# Supplementary material for: Selection of Machine Learning Models for Oil Price Forecasting: Based on the Dual Attributes of Oil
Source: Hindawi journal article supplement (doi:10.1155/2021/1566093), 2021-10-21
Supplement: f1 [file 1566093.f1.pdf]

| DATE      | FWTI  | SWTI  | PRO     | COM      | GAS  | RDL    | RUB  | GOLD  | SIL  |
|-----------|-------|-------|---------|----------|------|--------|------|-------|------|
| 1997/1/2  | 25.69 | 25.55 | 65180.2 | 41467.12 | 2.89 | 95.03  | 3.8  | 366.6 | 4.69 |
| 1997/1/3  | 25.59 | 25.55 | 65180.2 | 41467.12 | 3.11 | 95.44  | 3.8  | 362   | 4.65 |
| 1997/1/6  | 26.37 | 26.25 | 65180.2 | 41467.12 | 3.64 | 94.92  | 3.78 | 358.7 | 4.61 |
| 1997/1/7  | 26.23 | 26.25 | 65180.2 | 41467.12 | 3.33 | 95.05  | 3.78 | 359.7 | 4.67 |
| 1997/1/8  | 26.62 | 26.55 | 65180.2 | 41467.12 | 3.51 | 95.4   | 3.77 | 356.8 | 4.62 |
| 1997/1/9  | 26.37 | 26.3  | 65180.2 | 41467.12 | 3.48 | 94.7   | 3.78 | 358.8 | 4.7  |
| 1997/1/10 | 26.09 | 26.15 | 65180.2 | 41467.12 | 3.32 | 95.86  | 3.77 | 360.2 | 4.73 |
| 1997/1/13 | 25.19 | 25.2  | 65180.2 | 41467.12 | 3.25 | 96.14  | 3.82 | 359.7 | 4.68 |
| 1997/1/14 | 25.11 | 25.1  | 65180.2 | 41467.12 | 3.39 | 96.41  | 3.81 | 354.7 | 4.64 |
| 1997/1/15 | 25.95 | 25.95 | 65180.2 | 41467.12 | 3.61 | 95.71  | 3.82 | 353.2 | 4.65 |
| 1997/1/16 | 25.52 | 25.45 | 65180.2 | 41467.12 | 3.34 | 95.91  | 3.79 | 355   | 4.71 |
| 1997/1/17 | 25.41 | 25.4  | 65180.2 | 41467.12 | 3.26 | 96.52  | 3.8  | 356.4 | 4.74 |
| 1997/1/20 | 25.23 | 25.1  | 65180.2 | 41467.12 | 3.07 | 96.64  | 3.83 | 354.6 | 4.7  |
| 1997/1/21 | 24.8  | 24.8  | 65180.2 | 41467.12 | 2.92 | 96.75  | 3.82 | 353.8 | 4.69 |
| 1997/1/22 | 24.24 | 24.4  | 65180.2 | 41467.12 | 2.91 | 98.47  | 3.83 | 351.7 | 4.7  |
| 1997/1/23 | 24.18 | 23.85 | 65180.2 | 41467.12 | 2.79 | 98.69  | 3.91 | 352.5 | 4.85 |
| 1997/1/24 | 24.05 | 23.85 | 65180.2 | 41467.12 | 2.82 | 98.85  | 3.9  | 353.4 | 4.96 |
| 1997/1/27 | 23.94 | 23.85 | 65180.2 | 41467.12 | 2.99 | 99.28  | 3.91 | 357.3 | 5.03 |
| 1997/1/28 | 23.9  | 23.9  | 65180.2 | 41467.12 | 2.55 | 99.45  | 3.93 | 354   | 4.94 |
| 1997/1/29 | 24.47 | 24.5  | 65180.2 | 41467.12 | 2.44 | 99.55  | 3.94 | 351.8 | 4.92 |
| 1997/1/30 | 24.87 | 24.8  | 65180.2 | 41467.12 | 2.49 | 99.79  | 3.9  | 346.2 | 4.96 |
| 1997/1/31 | 24.15 | 24.15 | 65180.2 | 41467.12 | 2.39 | 100.52 | 3.89 | 344.9 | 4.92 |
| 1997/2/3  | 24.15 | 24.2  | 65540.1 | 41406.79 | 2.31 | 99.49  | 3.91 | 347.4 | 4.9  |
| 1997/2/4  | 24.02 | 24    | 65540.1 | 41406.79 | 2.5  | 99.33  | 3.85 | 345.6 | 4.86 |
| 1997/2/5  | 23.91 | 23.9  | 65540.1 | 41406.79 | 2.43 | 97.86  | 3.85 | 345.6 | 4.87 |
| 1997/2/6  | 23.1  | 23.05 | 65540.1 | 41406.79 | 2.36 | 98.41  | 3.81 | 344.3 | 4.86 |
| 1997/2/7  | 22.23 | 22.3  | 65540.1 | 41406.79 | 2.18 | 98.89  | 3.82 | 343.3 | 4.94 |
| 1997/2/10 | 22.46 | 22.45 | 65540.1 | 41406.79 | 2.17 | 98.15  | 3.83 | 342.5 | 4.96 |
| 1997/2/11 | 22.42 | 22.35 | 65540.1 | 41406.79 | 2.22 | 98.37  | 3.82 | 341.3 | 4.84 |
| 1997/2/12 | 21.86 | 21.75 | 65540.1 | 41406.79 | 2.09 | 98.64  | 3.81 | 344.9 | 5.14 |
| 1997/2/13 | 22.02 | 22.1  | 65540.1 | 41406.79 | 2    | 99.17  | 3.83 | 342.5 | 5.14 |
| 1997/2/14 | 22.41 | 22.4  | 65540.1 | 41406.79 | 1.97 | 99.18  | 3.86 | 346.4 | 5.25 |
| 1997/2/18 | 22.52 | 22.5  | 65540.1 | 41406.79 | 1.96 | 100.17 | 3.86 | 347.5 | 5.22 |
| 1997/2/19 | 22.79 | 22.65 | 65540.1 | 41406.79 | 2.02 | 99.6   | 3.88 | 347.5 | 5.19 |
| 1997/2/20 | 21.98 | 21.95 | 65540.1 | 41406.79 | 1.92 | 99.78  | 3.85 | 352.4 | 5.23 |
| 1997/2/21 | 21.39 | 21.6  | 65540.1 | 41406.79 | 1.94 | 99.51  | 3.85 | 354.1 | 5.19 |
| 1997/2/24 | 20.71 | 21    | 65540.1 | 41406.79 | 1.78 | 98.52  | 3.82 | 355.2 | 5.2  |
| 1997/2/25 | 21    | 20.95 | 65540.1 | 41406.79 | 1.87 | 98.44  | 3.81 | 356.1 | 5.23 |
| 1997/2/26 | 21.11 | 21.1  | 65540.1 | 41406.79 | 1.87 | 98.52  | 3.8  | 356   | 5.2  |
| 1997/2/27 | 20.89 | 20.8  | 65540.1 | 41406.79 | 1.84 | 99.06  | 3.8  | 361   | 5.24 |
| 1997/2/28 | 20.3  | 20.3  | 65540.1 | 41406.79 | 1.82 | 98.85  | 3.79 | 365.1 | 5.31 |
| 1997/3/3  | 20.25 | 20.25 | 65527.2 | 39981.81 | 1.8  | 99.45  | 3.77 | 363.8 | 5.29 |
| 1997/3/4  | 20.66 | 20.75 | 65527.2 | 39981.81 | 1.94 | 99.62  | 3.79 | 360.5 | 5.22 |
| 1997/3/5  | 20.49 | 20.5  | 65527.2 | 39981.81 | 1.84 | 99.6   | 3.79 | 354.4 | 5.2  |
| 1997/3/6  | 20.94 | 21    | 65527.2 | 39981.81 | 1.89 | 99.55  | 3.79 | 353.6 | 5.18 |
| 1997/3/7  | 21.28 | 21.35 | 65527.2 | 39981.81 | 1.95 | 100.33 | 3.79 | 349.9 | 5.14 |
| 1997/3/10 | 20.49 | 20.5  | 65527.2 | 39981.81 | 1.94 | 100.29 | 3.79 | 353.1 | 5.24 |
| 1997/3/11 | 20.11 | 20.15 | 65527.2 | 39981.81 | 1.92 | 100.03 | 3.82 | 355.1 | 5.25 |
| 1997/3/12 | 20.62 | 20.6  | 65527.2 | 39981.81 | 1.96 | 100.68 | 3.8  | 353.2 | 5.19 |
| 1997/3/13 | 20.7  | 20.65 | 65527.2 | 39981.81 | 1.94 | 100.73 | 3.82 | 354.5 | 5.28 |
| 1997/3/14 | 21.29 | 21.3  | 65527.2 | 39981.81 | 1.96 | 100.39 | 3.83 | 353   | 5.25 |
| 1997/3/17 | 20.92 | 20.9  | 65527.2 | 39981.81 | 1.91 | 101.25 | 3.81 | 348.3 | 5.21 |
| 1997/3/18 | 22.06 | 22    | 65527.2 | 39981.81 | 1.9  | 101.12 | 3.84 | 350.4 | 5.17 |

|           |       |       |         |          |      |        |      |       |      |
|-----------|-------|-------|---------|----------|------|--------|------|-------|------|
| 1997/3/19 | 22.04 | 22    | 65527.2 | 39981.81 | 1.9  | 100.66 | 3.83 | 352.9 | 5.21 |
| 1997/3/20 | 22.32 | 22    | 65527.2 | 39981.81 | 1.89 | 100.92 | 3.81 | 352.2 | 5.19 |
| 1997/3/21 | 21.51 | 21.7  | 65527.2 | 39981.81 | 1.84 | 100.24 | 3.83 | 353.5 | 5.14 |
| 1997/3/24 | 21.06 | 21    | 65527.2 | 39981.81 | 1.81 | 99.37  | 3.8  | 350.9 | 5.17 |
| 1997/3/25 | 20.99 | 20.95 | 65527.2 | 39981.81 | 1.88 | 99.38  | 3.76 | 348.2 | 5.09 |
| 1997/3/26 | 20.64 | 20.65 | 65527.2 | 39981.81 | 1.88 | 98.72  | 3.76 | 351.5 | 5.14 |
| 1997/3/27 | 20.7  | 20.7  | 65527.2 | 39981.81 | 1.93 | 98.45  | 3.73 | 350.2 | 5.15 |
| 1997/3/31 | 20.41 | 20.35 | 65527.2 | 39981.81 | 1.93 | 98.19  | 3.7  | 351   | 5.08 |
| 1997/4/1  | 20.28 | 20.3  | 66048.6 | 39843.31 | 1.88 | 97.69  | 3.69 | 351.6 | 5.01 |
| 1997/4/2  | 19.47 | 19.55 | 66048.6 | 39843.31 | 1.87 | 98.2   | 3.67 | 349.2 | 4.87 |
| 1997/4/3  | 19.47 | 19.45 | 66048.6 | 39843.31 | 1.91 | 98.19  | 3.68 | 348.5 | 4.73 |
| 1997/4/4  | 19.12 | 19.15 | 66048.6 | 39843.31 | 1.94 | 98.7   | 3.68 | 348.8 | 4.74 |
| 1997/4/7  | 19.23 | 19.25 | 66048.6 | 39843.31 | 1.95 | 99.12  | 3.7  | 348.4 | 4.79 |
| 1997/4/8  | 19.35 | 19.35 | 66048.6 | 39843.31 | 1.92 | 99.19  | 3.71 | 348.6 | 4.78 |
| 1997/4/9  | 19.27 | 19.25 | 66048.6 | 39843.31 | 1.9  | 99.56  | 3.71 | 348   | 4.78 |
| 1997/4/10 | 19.57 | 19.55 | 66048.6 | 39843.31 | 1.9  | 99.41  | 3.72 | 348.5 | 4.78 |
| 1997/4/11 | 19.53 | 19.5  | 66048.6 | 39843.31 | 1.93 | 99.12  | 3.71 | 347   | 4.72 |
| 1997/4/14 | 19.9  | 19.9  | 66048.6 | 39843.31 | 1.95 | 99.53  | 3.7  | 346.4 | 4.72 |
| 1997/4/15 | 19.83 | 19.6  | 66048.6 | 39843.31 | 1.94 | 99.07  | 3.71 | 341.7 | 4.71 |
| 1997/4/16 | 19.35 | 19.35 | 66048.6 | 39843.31 | 2.01 | 99.27  | 3.71 | 341.1 | 4.77 |
| 1997/4/17 | 19.42 | 19.5  | 66048.6 | 39843.31 | 2.07 | 98.97  | 3.71 | 342.1 | 4.7  |
| 1997/4/18 | 19.91 | 19.9  | 66048.6 | 39843.31 | 2.08 | 98.76  | 3.69 | 341.5 | 4.71 |
| 1997/4/21 | 20.38 | 20.35 | 66048.6 | 39843.31 | 2.06 | 98.66  | 3.68 | 343.3 | 4.74 |
| 1997/4/22 | 19.6  | 19.6  | 66048.6 | 39843.31 | 2.11 | 98.75  | 3.69 | 341.6 | 4.72 |
| 1997/4/23 | 19.73 | 19.65 | 66048.6 | 39843.31 | 2.06 | 99.42  | 3.68 | 341.5 | 4.73 |
| 1997/4/24 | 20.03 | 19.85 | 66048.6 | 39843.31 | 2.12 | 99.19  | 3.7  | 340.9 | 4.69 |
| 1997/4/25 | 19.99 | 19.8  | 66048.6 | 39843.31 | 2.13 | 99.37  | 3.7  | 342.4 | 4.72 |
| 1997/4/28 | 19.91 | 19.85 | 66048.6 | 39843.31 | 2.08 | 99.32  | 3.71 | 339.9 | 4.61 |
| 1997/4/29 | 20.44 | 20.4  | 66048.6 | 39843.31 | 2.14 | 98.89  | 3.7  | 341.6 | 4.62 |
| 1997/4/30 | 20.21 | 20.2  | 66048.6 | 39843.31 | 2.18 | 99.4   | 3.67 | 341.2 | 4.65 |
| 1997/5/1  | 19.91 | 19.9  | 65393.8 | 38321.84 | 2.24 | 99.62  | 3.67 | 341.7 | 4.72 |
| 1997/5/2  | 19.6  | 19.6  | 65393.8 | 38321.84 | 2.27 | 99.77  | 3.67 | 341.6 | 4.69 |
| 1997/5/5  | 19.63 | 19.6  | 65393.8 | 38321.84 | 2.22 | 99.68  | 3.68 | 344.3 | 4.73 |
| 1997/5/6  | 19.66 | 19.7  | 65393.8 | 38321.84 | 2.31 | 99.05  | 3.69 | 341.5 | 4.69 |
| 1997/5/7  | 19.62 | 19.6  | 65393.8 | 38321.84 | 2.35 | 100.16 | 3.65 | 342.4 | 4.72 |
| 1997/5/8  | 20.34 | 20.35 | 65393.8 | 38321.84 | 2.27 | 99.95  | 3.67 | 344.8 | 4.82 |
| 1997/5/9  | 20.43 | 20.45 | 65393.8 | 38321.84 | 2.24 | 99.74  | 3.67 | 349.3 | 4.84 |
| 1997/5/12 | 21.38 | 21.4  | 65393.8 | 38321.84 | 2.22 | 99.76  | 3.68 | 348.7 | 4.8  |
| 1997/5/13 | 21.37 | 21.1  | 65393.8 | 38321.84 | 2.19 | 99.18  | 3.68 | 350.5 | 4.84 |
| 1997/5/14 | 21.39 | 21.35 | 65393.8 | 38321.84 | 2.28 | 98.31  | 3.65 | 348.2 | 4.8  |
| 1997/5/15 | 21.3  | 21.3  | 65393.8 | 38321.84 | 2.2  | 98.58  | 3.63 | 348.4 | 4.82 |
| 1997/5/16 | 22.12 | 22.1  | 65393.8 | 38321.84 | 2.25 | 98.92  | 3.64 | 344.9 | 4.66 |
| 1997/5/19 | 21.59 | 21.5  | 65393.8 | 38321.84 | 2.22 | 98.82  | 3.64 | 342.2 | 4.68 |
| 1997/5/20 | 21.19 | 21.2  | 65393.8 | 38321.84 | 2.19 | 97.67  | 3.63 | 343.4 | 4.68 |
| 1997/5/21 | 21.86 | 21.6  | 65393.8 | 38321.84 | 2.21 | 98.28  | 3.61 | 343.7 | 4.67 |
| 1997/5/22 | 21.86 | 21.6  | 65393.8 | 38321.84 | 2.2  | 99.64  | 3.62 | 343.2 | 4.65 |
| 1997/5/23 | 21.63 | 21.25 | 65393.8 | 38321.84 | 2.29 | 98.98  | 3.66 | 343.1 | 4.71 |
| 1997/5/27 | 20.79 | 20.75 | 65393.8 | 38321.84 | 2.36 | 99.18  | 3.64 | 344.7 | 4.72 |
| 1997/5/28 | 20.79 | 20.7  | 65393.8 | 38321.84 | 2.35 | 98.65  | 3.65 | 345.3 | 4.71 |
| 1997/5/29 | 20.97 | 21.15 | 65393.8 | 38321.84 | 2.25 | 98.74  | 3.65 | 345.9 | 4.84 |
| 1997/5/30 | 20.88 | 21    | 65393.8 | 38321.84 | 2.24 | 98.65  | 3.64 | 344.8 | 4.68 |
| 1997/6/2  | 20.98 | 21.15 | 64622.2 | 39527.12 | 2.11 | 99.09  | 3.61 | 343.7 | 4.7  |
| 1997/6/3  | 20.33 | 20.35 | 64622.2 | 39527.12 | 2.1  | 99.25  | 3.62 | 343   | 4.73 |
| 1997/6/4  | 20.12 | 20.3  | 64622.2 | 39527.12 | 2.16 | 99.33  | 3.62 | 340.9 | 4.7  |

|           |       |       |         |          |      |        |      |       |      |
|-----------|-------|-------|---------|----------|------|--------|------|-------|------|
| 1997/6/5  | 19.66 | 19.8  | 64622.2 | 39527.12 | 2.18 | 99.27  | 3.62 | 343   | 4.77 |
| 1997/6/6  | 18.79 | 19    | 64622.2 | 39527.12 | 2.19 | 99.32  | 3.62 | 343.2 | 4.78 |
| 1997/6/9  | 18.68 | 18.85 | 64622.2 | 39527.12 | 2.14 | 98.93  | 3.62 | 343.9 | 4.74 |
| 1997/6/10 | 18.67 | 18.85 | 64622.2 | 39527.12 | 2.12 | 98.99  | 3.61 | 343.7 | 4.75 |
| 1997/6/11 | 18.53 | 18.75 | 64622.2 | 39527.12 | 2.07 | 99.03  | 3.6  | 343.6 | 4.75 |
| 1997/6/12 | 18.69 | 19    | 64622.2 | 39527.12 | 2.08 | 99.44  | 3.6  | 341.4 | 4.71 |
| 1997/6/13 | 18.83 | 18.95 | 64622.2 | 39527.12 | 2.15 | 99.2   | 3.62 | 340.9 | 4.68 |
| 1997/6/16 | 19.01 | 19.1  | 64622.2 | 39527.12 | 2.15 | 99.02  | 3.61 | 342.9 | 4.69 |
| 1997/6/17 | 19.23 | 19.3  | 64622.2 | 39527.12 | 2.16 | 98.86  | 3.61 | 341.8 | 4.76 |
| 1997/6/18 | 18.79 | 18.9  | 64622.2 | 39527.12 | 2.17 | 98.99  | 3.6  | 339.1 | 4.7  |
| 1997/6/19 | 18.67 | 18.75 | 64622.2 | 39527.12 | 2.22 | 98.39  | 3.6  | 340.5 | 4.75 |
| 1997/6/20 | 18.55 | 18.6  | 64622.2 | 39527.12 | 2.24 | 97.87  | 3.58 | 337.7 | 4.71 |
| 1997/6/23 | 19.14 | 18.9  | 64622.2 | 39527.12 | 2.25 | 97.18  | 3.57 | 339.4 | 4.81 |
| 1997/6/24 | 19.03 | 18.71 | 64622.2 | 39527.12 | 2.29 | 97.12  | 3.54 | 337.8 | 4.75 |
| 1997/6/25 | 19.52 | 19.12 | 64622.2 | 39527.12 | 2.21 | 97.57  | 3.54 | 337.3 | 4.76 |
| 1997/6/26 | 19.09 | 18.84 | 64622.2 | 39527.12 | 2.15 | 97.37  | 3.55 | 338.5 | 4.74 |
| 1997/6/27 | 19.46 | 19.42 | 64622.2 | 39527.12 | 2.14 | 97.5   | 3.55 | 335.9 | 4.68 |
| 1997/6/30 | 19.8  | 19.82 | 64622.2 | 39527.12 | 2.14 | 97.3   | 3.5  | 335.3 | 4.6  |
| 1997/7/1  | 20.12 | 20.11 | 65068.5 | 40969.09 | 2.11 | 97.23  | 3.5  | 335.1 | 4.63 |
| 1997/7/2  | 20.34 | 20.39 | 65068.5 | 40969.09 | 2.07 | 96.22  | 3.51 | 332.3 | 4.6  |
| 1997/7/3  | 19.56 | 19.48 | 65068.5 | 40969.09 | 2.1  | 95.41  | 3.48 | 325.2 | 4.53 |
| 1997/7/7  | 19.52 | 19.53 | 65068.5 | 40969.09 | 2.07 | 95.43  | 3.45 | 319   | 4.25 |
| 1997/7/8  | 19.73 | 19.67 | 65068.5 | 40969.09 | 2.12 | 95.67  | 3.46 | 321   | 4.3  |
| 1997/7/9  | 19.46 | 19.4  | 65068.5 | 40969.09 | 2.1  | 95.6   | 3.45 | 318.9 | 4.29 |
| 1997/7/10 | 19.22 | 19.22 | 65068.5 | 40969.09 | 2.12 | 95.58  | 3.46 | 320.8 | 4.35 |
| 1997/7/11 | 19.33 | 19.39 | 65068.5 | 40969.09 | 2.09 | 95.39  | 3.45 | 322.2 | 4.33 |
| 1997/7/14 | 18.99 | 18.92 | 65068.5 | 40969.09 | 2.15 | 95.54  | 3.44 | 320.8 | 4.24 |
| 1997/7/15 | 19.67 | 19.81 | 65068.5 | 40969.09 | 2.16 | 96.02  | 3.45 | 319   | 4.27 |
| 1997/7/16 | 19.65 | 19.57 | 65068.5 | 40969.09 | 2.17 | 96.13  | 3.48 | 318.7 | 4.16 |
| 1997/7/17 | 19.99 | 19.92 | 65068.5 | 40969.09 | 2.18 | 96.38  | 3.47 | 324.7 | 4.22 |
| 1997/7/18 | 19.27 | 19.22 | 65068.5 | 40969.09 | 2.17 | 96.1   | 3.48 | 329.6 | 4.24 |
| 1997/7/21 | 19.18 | 19.25 | 65068.5 | 40969.09 | 2.09 | 96.1   | 3.47 | 326.2 | 4.23 |
| 1997/7/22 | 19.08 | 19.25 | 65068.5 | 40969.09 | 2.12 | 96.09  | 3.47 | 326   | 4.28 |
| 1997/7/23 | 19.63 | 19.68 | 65068.5 | 40969.09 | 2.15 | 96.07  | 3.46 | 323.8 | 4.27 |
| 1997/7/24 | 19.77 | 19.71 | 65068.5 | 40969.09 | 2.18 | 96.33  | 3.47 | 323.8 | 4.25 |
| 1997/7/25 | 19.89 | 19.71 | 65068.5 | 40969.09 | 2.15 | 97.02  | 3.47 | 326.5 | 4.3  |
| 1997/7/28 | 19.81 | 19.67 | 65068.5 | 40969.09 | 2.18 | 98.68  | 3.5  | 329.5 | 4.33 |
| 1997/7/29 | 19.85 | 20.08 | 65068.5 | 40969.09 | 2.16 | 98.96  | 3.56 | 325.8 | 4.3  |
| 1997/7/30 | 20.3  | 20.43 | 65068.5 | 40969.09 | 2.16 | 98.65  | 3.56 | 326   | 4.37 |
| 1997/7/31 | 20.14 | 20.19 | 65068.5 | 40969.09 | 2.18 | 98.28  | 3.57 | 324.1 | 4.49 |
| 1997/8/1  | 20.28 | 20.27 | 65949.5 | 39510.05 | 2.16 | 99.22  | 3.56 | 324.7 | 4.47 |
| 1997/8/4  | 20.75 | 20.81 | 65949.5 | 39510.05 | 2.37 | 99.19  | 3.59 | 323.9 | 4.51 |
| 1997/8/5  | 20.81 | 20.79 | 65949.5 | 39510.05 | 2.37 | 99.67  | 3.59 | 320.4 | 4.32 |
| 1997/8/6  | 20.46 | 20.46 | 65949.5 | 39510.05 | 2.35 | 100.98 | 3.6  | 318.2 | 4.33 |
| 1997/8/7  | 20.09 | 20.09 | 65949.5 | 39510.05 | 2.44 | 101.87 | 3.65 | 321.5 | 4.38 |
| 1997/8/8  | 19.54 | 19.58 | 65949.5 | 39510.05 | 2.5  | 101.87 | 3.68 | 326.1 | 4.38 |
| 1997/8/11 | 19.69 | 19.73 | 65949.5 | 39510.05 | 2.59 | 101.79 | 3.67 | 328.2 | 4.44 |
| 1997/8/12 | 19.99 | 19.91 | 65949.5 | 39510.05 | 2.48 | 102.45 | 3.68 | 326.7 | 4.43 |
| 1997/8/13 | 20.19 | 20.19 | 65949.5 | 39510.05 | 2.47 | 102.26 | 3.7  | 326.8 | 4.51 |
| 1997/8/14 | 20.08 | 20.02 | 65949.5 | 39510.05 | 2.43 | 101.75 | 3.69 | 324.2 | 4.41 |
| 1997/8/15 | 20.07 | 20.08 | 65949.5 | 39510.05 | 2.43 | 100.51 | 3.67 | 325.7 | 4.56 |
| 1997/8/18 | 19.91 | 19.94 | 65949.5 | 39510.05 | 2.43 | 100.83 | 3.62 | 321.1 | 4.5  |
| 1997/8/19 | 20.12 | 20.04 | 65949.5 | 39510.05 | 2.53 | 100.95 | 3.63 | 323   | 4.51 |
| 1997/8/20 | 20.06 | 20.07 | 65949.5 | 39510.05 | 2.45 | 101.63 | 3.65 | 321.3 | 4.49 |

|            |       |       |         |          |      |        |      |       |      |
|------------|-------|-------|---------|----------|------|--------|------|-------|------|
| 1997/8/21  | 19.66 | 19.83 | 65949.5 | 39510.05 | 2.37 | 101.81 | 3.66 | 323.2 | 4.51 |
| 1997/8/22  | 19.7  | 19.7  | 65949.5 | 39510.05 | 2.45 | 100.63 | 3.67 | 326.2 | 4.68 |
| 1997/8/25  | 19.26 | 19.29 | 65949.5 | 39510.05 | 2.49 | 100.82 | 3.63 | 324.6 | 4.61 |
| 1997/8/26  | 19.28 | 19.31 | 65949.5 | 39510.05 | 2.51 | 100.57 | 3.63 | 325.7 | 4.66 |
| 1997/8/27  | 19.73 | 19.65 | 65949.5 | 39510.05 | 2.52 | 100.38 | 3.61 | 325.5 | 4.64 |
| 1997/8/28  | 19.58 | 19.59 | 65949.5 | 39510.05 | 2.66 | 100.04 | 3.61 | 325.1 | 4.64 |
| 1997/8/29  | 19.61 | 19.66 | 65949.5 | 39510.05 | 2.71 | 99.89  | 3.6  | 325.5 | 4.62 |
| 1997/9/2   | 19.65 | 19.73 | 66311.9 | 40414.87 | 2.79 | 101.99 | 3.64 | 324   | 4.6  |
| 1997/9/3   | 19.61 | 19.65 | 66311.9 | 40414.87 | 2.81 | 102.31 | 3.68 | 323.3 | 4.64 |
| 1997/9/4   | 19.4  | 19.46 | 66311.9 | 40414.87 | 2.68 | 102.4  | 3.7  | 322.6 | 4.65 |
| 1997/9/5   | 19.63 | 19.61 | 66311.9 | 40414.87 | 2.7  | 101.79 | 3.69 | 323.8 | 4.67 |
| 1997/9/8   | 19.45 | 19.43 | 66311.9 | 40414.87 | 2.69 | 102.57 | 3.68 | 323.1 | 4.65 |
| 1997/9/9   | 19.42 | 19.5  | 66311.9 | 40414.87 | 2.7  | 101.86 | 3.69 | 322.6 | 4.7  |
| 1997/9/10  | 19.42 | 19.5  | 66311.9 | 40414.87 | 2.7  | 102.21 | 3.68 | 322.6 | 4.69 |
| 1997/9/11  | 19.37 | 19.41 | 66311.9 | 40414.87 | 2.77 | 101.42 | 3.68 | 325.1 | 4.71 |
| 1997/9/12  | 19.32 | 19.37 | 66311.9 | 40414.87 | 2.8  | 100.93 | 3.66 | 324.8 | 4.72 |
| 1997/9/15  | 19.27 | 19.3  | 66311.9 | 40414.87 | 2.79 | 101.03 | 3.64 | 323.3 | 4.71 |
| 1997/9/16  | 19.61 | 19.67 | 66311.9 | 40414.87 | 2.72 | 101.44 | 3.65 | 321.4 | 4.57 |
| 1997/9/17  | 19.42 | 19.44 | 66311.9 | 40414.87 | 2.68 | 101.41 | 3.66 | 320.8 | 4.56 |
| 1997/9/18  | 19.38 | 19.41 | 66311.9 | 40414.87 | 2.89 | 100.72 | 3.65 | 321.3 | 4.64 |
| 1997/9/19  | 19.35 | 19.37 | 66311.9 | 40414.87 | 2.84 | 100.63 | 3.63 | 321.6 | 4.67 |
| 1997/9/22  | 19.6  | 19.61 | 66311.9 | 40414.87 | 2.99 | 101.08 | 3.63 | 321.6 | 4.63 |
| 1997/9/23  | 19.79 | 19.71 | 66311.9 | 40414.87 | 3.05 | 100.47 | 3.63 | 322.6 | 4.65 |
| 1997/9/24  | 19.94 | 20.03 | 66311.9 | 40414.87 | 3.02 | 100.5  | 3.61 | 324   | 4.71 |
| 1997/9/25  | 20.39 | 20.38 | 66311.9 | 40414.87 | 3.3  | 99.54  | 3.61 | 327.4 | 4.75 |
| 1997/9/26  | 20.87 | 20.87 | 66311.9 | 40414.87 | 3.35 | 100.91 | 3.6  | 326.9 | 4.78 |
| 1997/9/29  | 21.26 | 21.29 | 66311.9 | 40414.87 | 3.02 | 100.66 | 3.63 | 328.1 | 5.11 |
| 1997/9/30  | 21.18 | 21.13 | 66311.9 | 40414.87 | 3.08 | 100.18 | 3.61 | 334.3 | 5.23 |
| 1997/10/1  | 21.05 | 21.02 | 66828   | 41278.23 | 3.12 | 100.25 | 3.59 | 333.6 | 5.19 |
| 1997/10/2  | 21.77 | 21.82 | 66828   | 41278.23 | 3.11 | 100.1  | 3.6  | 331   | 5.17 |
| 1997/10/3  | 22.76 | 22.86 | 66828   | 41278.23 | 3.13 | 100.07 | 3.61 | 334.6 | 5.3  |
| 1997/10/6  | 21.93 | 21.97 | 66828   | 41278.23 | 2.98 | 100.19 | 3.6  | 332.3 | 5.21 |
| 1997/10/7  | 21.96 | 21.88 | 66828   | 41278.23 | 2.88 | 99.7   | 3.6  | 331   | 5.2  |
| 1997/10/8  | 22.18 | 22.19 | 66828   | 41278.23 | 2.92 | 99.77  | 3.58 | 332.9 | 5.23 |
| 1997/10/9  | 22.12 | 22.01 | 66828   | 41278.23 | 2.93 | 99.51  | 3.58 | 326.9 | 5.13 |
| 1997/10/10 | 22.1  | 22.01 | 66828   | 41278.23 | 3.08 | 99.48  | 3.57 | 328.9 | 5.2  |
| 1997/10/13 | 21.32 | 21.34 | 66828   | 41278.23 | 3.03 | 99.57  | 3.58 | 327.7 | 5.15 |
| 1997/10/14 | 20.7  | 20.75 | 66828   | 41278.23 | 3.01 | 99.79  | 3.58 | 327.2 | 5.08 |
| 1997/10/15 | 20.57 | 20.65 | 66828   | 41278.23 | 3.04 | 99.67  | 3.58 | 326.1 | 5.07 |
| 1997/10/16 | 20.97 | 20.98 | 66828   | 41278.23 | 3.25 | 99.94  | 3.57 | 324.9 | 4.91 |
| 1997/10/17 | 20.59 | 21.41 | 66828   | 41278.23 | 3.29 | 100.05 | 3.59 | 324.3 | 4.96 |
| 1997/10/20 | 20.7  | 20.69 | 66828   | 41278.23 | 3.39 | 99.05  | 3.56 | 323   | 4.94 |
| 1997/10/21 | 20.67 | 20.68 | 66828   | 41278.23 | 3.4  | 99.04  | 3.56 | 322.3 | 4.98 |
| 1997/10/22 | 21.42 | 21.44 | 66828   | 41278.23 | 3.54 | 99.12  | 3.55 | 322.1 | 5.03 |
| 1997/10/23 | 21.09 | 21.18 | 66828   | 41278.23 | 3.43 | 98.99  | 3.55 | 323   | 4.94 |
| 1997/10/24 | 20.97 | 20.99 | 66828   | 41278.23 | 3.55 | 99.09  | 3.56 | 307.3 | 4.79 |
| 1997/10/27 | 21.07 | 21.03 | 66828   | 41278.23 | 3.79 | 97.2   | 3.54 | 311.3 | 4.79 |
| 1997/10/28 | 20.46 | 20.4  | 66828   | 41278.23 | 3.47 | 97.06  | 3.47 | 315.6 | 4.81 |
| 1997/10/29 | 20.71 | 20.82 | 66828   | 41278.23 | 3.27 | 96.89  | 3.47 | 313.5 | 4.8  |
| 1997/10/30 | 21.22 | 21.26 | 66828   | 41278.23 | 3.48 | 96.89  | 3.47 | 317.2 | 4.87 |
| 1997/10/31 | 21.08 | 21.1  | 66828   | 41278.23 | 3.55 | 96.6   | 3.46 | 312.1 | 4.74 |
| 1997/11/3  | 20.96 | 20.91 | 66681   | 40663.97 | 3.37 | 96.45  | 3.44 | 314.4 | 4.85 |
| 1997/11/4  | 20.7  | 20.64 | 66681   | 40663.97 | 3.42 | 96.09  | 3.44 | 314.8 | 4.85 |
| 1997/11/5  | 20.31 | 20.44 | 66681   | 40663.97 | 3.47 | 96.29  | 3.42 | 314.5 | 4.87 |

|            |       |       |         |          |      |       |        |       |      |
|------------|-------|-------|---------|----------|------|-------|--------|-------|------|
| 1997/11/6  | 20.39 | 20.46 | 66681   | 40663.97 | 3.39 | 95.83 | 3.43   | 313.2 | 4.9  |
| 1997/11/7  | 20.77 | 20.8  | 66681   | 40663.97 | 3.26 | 95.86 | 3.43   | 311.2 | 4.85 |
| 1997/11/10 | 20.4  | 20.46 | 66681   | 40663.97 | 3.43 | 95    | 3.41   | 311.1 | 4.86 |
| 1997/11/11 | 20.51 | 20.54 | 66681   | 40663.97 | 3.5  | 94.91 | 3.38   | 310.6 | 4.91 |
| 1997/11/12 | 20.49 | 20.53 | 66681   | 40663.97 | 3.48 | 94.96 | 3.37   | 308.4 | 4.9  |
| 1997/11/13 | 20.7  | 20.76 | 66681   | 40663.97 | 3.25 | 95.32 | 3.38   | 308.8 | 5.14 |
| 1997/11/14 | 21    | 21.01 | 66681   | 40663.97 | 3.03 | 95.55 | 3.38   | 304.3 | 5.08 |
| 1997/11/17 | 20.26 | 20.29 | 66681   | 40663.97 | 2.97 | 95.38 | 3.41   | 304.7 | 5.12 |
| 1997/11/18 | 20.04 | 20.01 | 66681   | 40663.97 | 2.95 | 95.63 | 3.39   | 307.6 | 5.1  |
| 1997/11/19 | 19.8  | 19.82 | 66681   | 40663.97 | 2.86 | 95.72 | 3.39   | 305   | 5.22 |
| 1997/11/20 | 19.16 | 19.17 | 66681   | 40663.97 | 2.71 | 95.72 | 3.4    | 303.8 | 5.23 |
| 1997/11/21 | 19.76 | 19.76 | 66681   | 40663.97 | 2.76 | 95.58 | 3.4    | 305.9 | 5.42 |
| 1997/11/24 | 19.83 | 19.41 | 66681   | 40663.97 | 2.58 | 95.74 | 3.39   | 303.9 | 5.38 |
| 1997/11/25 | 19.73 | 19.35 | 66681   | 40663.97 | 2.66 | 96.64 | 3.4    | 300.5 | 5.22 |
| 1997/11/26 | 19.15 | 19.13 | 66681   | 40663.97 | 2.58 | 96.72 | 3.42   | 296.9 | 5.22 |
| 1997/12/1  | 18.66 | 18.76 | 66494.9 | 43159.65 | 2.77 | 96.28 | 3.37   | 294.3 | 5.27 |
| 1997/12/2  | 18.76 | 18.67 | 66494.9 | 43159.65 | 2.72 | 96.57 | 3.37   | 294.4 | 5.28 |
| 1997/12/3  | 18.8  | 18.81 | 66494.9 | 43159.65 | 2.61 | 96.46 | 3.37   | 292.6 | 5.25 |
| 1997/12/4  | 18.6  | 18.49 | 66494.9 | 43159.65 | 2.46 | 97.44 | 3.37   | 286.5 | 5.24 |
| 1997/12/5  | 18.71 | 18.72 | 66494.9 | 43159.65 | 2.45 | 97.79 | 3.41   | 288.4 | 5.37 |
| 1997/12/8  | 18.84 | 18.86 | 66494.9 | 43159.65 | 2.42 | 98.45 | 3.42   | 287.9 | 5.34 |
| 1997/12/9  | 18.67 | 18.79 | 66494.9 | 43159.65 | 2.53 | 98.3  | 3.44   | 282.8 | 5.4  |
| 1997/12/10 | 18.14 | 18.15 | 66494.9 | 43159.65 | 2.35 | 98.39 | 3.44   | 286.6 | 5.83 |
| 1997/12/11 | 18.15 | 18.18 | 66494.9 | 43159.65 | 2.34 | 97.79 | 3.43   | 284   | 5.77 |
| 1997/12/12 | 18.21 | 18.21 | 66494.9 | 43159.65 | 2.36 | 98.26 | 3.43   | 282.8 | 5.84 |
| 1997/12/15 | 18.17 | 18.18 | 66494.9 | 43159.65 | 2.31 | 99.37 | 3.44   | 284.5 | 5.87 |
| 1997/12/16 | 18.17 | 18.19 | 66494.9 | 43159.65 | 2.41 | 99.24 | 3.47   | 283.4 | 5.91 |
| 1997/12/17 | 18.19 | 18.22 | 66494.9 | 43159.65 | 2.44 | 98.34 | 3.45   | 289.1 | 5.93 |
| 1997/12/18 | 18.52 | 18.51 | 66494.9 | 43159.65 | 2.41 | 97.29 | 3.43   | 287.2 | 6.03 |
| 1997/12/19 | 18.39 | 18.46 | 66494.9 | 43159.65 | 2.47 | 97.18 | 3.39   | 289.5 | 6.01 |
| 1997/12/22 | 18.32 | 18.29 | 66494.9 | 43159.65 | 2.37 | 97.62 | 3.39   | 291.1 | 5.98 |
| 1997/12/23 | 18.33 | 18.39 | 66494.9 | 43159.65 | 2.22 | 97.32 | 3.4    | 294.3 | 6.2  |
| 1997/12/24 | 18.35 | 18.36 | 66494.9 | 43159.65 | 2.25 | 97.27 | 3.39   | 296.8 | 6.34 |
| 1997/12/26 | 18.2  | 18.19 | 66494.9 | 43159.65 | 2.25 | 96.69 | 3.38   | 295.2 | 6.31 |
| 1997/12/29 | 17.62 | 17.64 | 66494.9 | 43159.65 | 2.31 | 97.15 | 3.36   | 291.8 | 6.28 |
| 1997/12/30 | 17.6  | 17.6  | 66494.9 | 43159.65 | 2.24 | 98    | 3.36   | 291.6 | 6.13 |
| 1997/12/31 | 17.64 | 17.65 | 66494.9 | 43159.65 | 2.26 | 98.5  | 3296.2 | 289.9 | 5.93 |
| 1998/1/2   | 17.43 | 17.41 | 67710.7 | 39983.95 | 2.15 | 97.91 | 3296.2 | 289.4 | 5.9  |
| 1998/1/5   | 16.89 | 16.95 | 67710.7 | 39983.95 | 2.21 | 98.79 | 3357.8 | 282.7 | 5.87 |
| 1998/1/6   | 16.91 | 16.64 | 67710.7 | 39983.95 | 2.18 | 99.33 | 3389   | 282.3 | 6.02 |
| 1998/1/7   | 16.82 | 16.91 | 67710.7 | 39983.95 | 2.15 | 99.13 | 3389   | 284.7 | 5.97 |
| 1998/1/8   | 16.97 | 17.01 | 67710.7 | 39983.95 | 2.05 | 99.89 | 3400.1 | 281.8 | 5.73 |
| 1998/1/9   | 16.63 | 16.65 | 67710.7 | 39983.95 | 2.05 | 99.7  | 3409.2 | 279.1 | 5.59 |
| 1998/1/12  | 16.47 | 16.53 | 67710.7 | 39983.95 | 2    | 99.28 | 3414.4 | 278.9 | 5.44 |
| 1998/1/13  | 16.43 | 16.44 | 67710.7 | 39983.95 | 2.01 | 98.6  | 3386.1 | 283.8 | 5.65 |
| 1998/1/14  | 16.45 | 16.54 | 67710.7 | 39983.95 | 2.02 | 98.88 | 3379.2 | 282.4 | 5.66 |
| 1998/1/15  | 16.34 | 16.35 | 67710.7 | 39983.95 | 2.09 | 98.82 | 3374.3 | 286.4 | 5.78 |
| 1998/1/16  | 16.51 | 16.48 | 67710.7 | 39983.95 | 2.18 | 98.63 | 3369.4 | 291.1 | 5.76 |
| 1998/1/20  | 16.42 | 16.43 | 67710.7 | 39983.95 | 2.12 | 99.06 | 3355.1 | 291.3 | 5.64 |
| 1998/1/21  | 16.36 | 16.05 | 67710.7 | 39983.95 | 2.08 | 98.66 | 3367.7 | 293.3 | 5.77 |
| 1998/1/22  | 16.04 | 15.93 | 67710.7 | 39983.95 | 2.16 | 97.65 | 3338.5 | 291.3 | 5.69 |
| 1998/1/23  | 15.74 | 15.65 | 67710.7 | 39983.95 | 2.12 | 96.42 | 3318.5 | 300.3 | 5.86 |
| 1998/1/26  | 16.82 | 16.96 | 67710.7 | 39983.95 | 2.06 | 97.26 | 3261.2 | 297.1 | 5.91 |
| 1998/1/27  | 16.98 | 17.06 | 67710.7 | 39983.95 | 2.04 | 97.88 | 3294.2 | 300.7 | 6.07 |

|           |       |       |         |          |      |       |        |       |      |
|-----------|-------|-------|---------|----------|------|-------|--------|-------|------|
| 1998/1/28 | 17.31 | 17.35 | 67710.7 | 39983.95 | 2    | 98.21 | 3336.3 | 306   | 6.02 |
| 1998/1/29 | 17.82 | 17.93 | 67710.7 | 39983.95 | 2.1  | 98.24 | 3332.2 | 302.8 | 6.03 |
| 1998/1/30 | 17.21 | 17.21 | 67710.7 | 39983.95 | 2.26 | 98.51 | 3336.9 | 302.9 | 6.13 |
| 1998/2/2  | 17.05 | 17.07 | 68083.7 | 41267.31 | 2.33 | 98.25 | 3323.7 | 303.4 | 6.25 |
| 1998/2/3  | 16.5  | 16.43 | 68083.7 | 41267.31 | 2.31 | 97.99 | 3296.2 | 295.8 | 6.62 |
| 1998/2/4  | 16.37 | 16.42 | 68083.7 | 41267.31 | 2.3  | 97.35 | 3301.5 | 300   | 7.02 |
| 1998/2/5  | 16.58 | 16.63 | 68083.7 | 41267.31 | 2.38 | 97.6  | 3278.3 | 299.5 | 7.28 |
| 1998/2/6  | 16.7  | 16.72 | 68083.7 | 41267.31 | 2.36 | 98.22 | 3289.2 | 298.8 | 7.06 |
| 1998/2/9  | 16.63 | 16.59 | 68083.7 | 41267.31 | 2.22 | 99    | 3301.8 | 300.6 | 6.95 |
| 1998/2/10 | 16.43 | 16.48 | 68083.7 | 41267.31 | 2.27 | 99.24 | 3325.4 | 301.2 | 7.1  |
| 1998/2/11 | 16.15 | 16.17 | 68083.7 | 41267.31 | 2.24 | 98.84 | 3332.5 | 300.7 | 7    |
| 1998/2/12 | 15.96 | 15.97 | 68083.7 | 41267.31 | 2.29 | 98.4  | 3317.1 | 299.3 | 7    |
| 1998/2/13 | 16.02 | 16.03 | 68083.7 | 41267.31 | 2.21 | 98.22 | 3306.3 | 300.6 | 7.1  |
| 1998/2/17 | 15.66 | 15.64 | 68083.7 | 41267.31 | 2.17 | 98.74 | 3299.7 | 298.6 | 6.77 |
| 1998/2/18 | 16.25 | 16.24 | 68083.7 | 41267.31 | 2.24 | 98.46 | 3314.7 | 298.2 | 6.57 |
| 1998/2/19 | 16.16 | 16.12 | 68083.7 | 41267.31 | 2.22 | 98.55 | 3298   | 299.8 | 6.82 |
| 1998/2/20 | 16.15 | 16.13 | 68083.7 | 41267.31 | 2.2  | 98.41 | 3298.8 | 298.1 | 6.52 |
| 1998/2/23 | 15.37 | 15.23 | 68083.7 | 41267.31 | 2.18 | 98    | 3300.7 | 294.1 | 6.47 |
| 1998/2/24 | 15.31 | 15.14 | 68083.7 | 41267.31 | 2.22 | 97.77 | 3282.4 | 291.7 | 6.34 |
| 1998/2/25 | 15.45 | 15.28 | 68083.7 | 41267.31 | 2.29 | 98.16 | 3271.5 | 292.1 | 6.01 |
| 1998/2/26 | 15.35 | 15.41 | 68083.7 | 41267.31 | 2.28 | 98.14 | 3285.4 | 295.4 | 6.15 |
| 1998/2/27 | 15.44 | 15.44 | 68083.7 | 41267.31 | 2.32 | 98.01 | 3278.1 | 300.1 | 6.43 |
| 1998/3/2  | 15.34 | 15.32 | 67964.7 | 41421.35 | 2.29 | 97.99 | 3246   | 300.5 | 6.51 |
| 1998/3/3  | 15.27 | 15.28 | 67964.7 | 41421.35 | 2.24 | 97.81 | 3264.1 | 298.5 | 6.34 |
| 1998/3/4  | 15.32 | 15.33 | 67964.7 | 41421.35 | 2.23 | 97.87 | 3249.6 | 296.8 | 6.3  |
| 1998/3/5  | 15.33 | 15.34 | 67964.7 | 41421.35 | 2.14 | 98.83 | 3261   | 294.1 | 6.32 |
| 1998/3/6  | 14.91 | 14.9  | 67964.7 | 41421.35 | 2.13 | 98.5  | 3282.6 | 295.2 | 6.04 |
| 1998/3/9  | 14.33 | 14.58 | 67964.7 | 41421.35 | 2.17 | 98.47 | 3282.6 | 295   | 6.06 |
| 1998/3/10 | 14.26 | 14.54 | 67964.7 | 41421.35 | 2.14 | 98.35 | 3277.8 | 296.5 | 6.27 |
| 1998/3/11 | 14.18 | 14.3  | 67964.7 | 41421.35 | 2.17 | 97.9  | 3271.8 | 295.1 | 6.09 |
| 1998/3/12 | 14.2  | 14.4  | 67964.7 | 41421.35 | 2.13 | 97.48 | 3254.3 | 295.1 | 6.15 |
| 1998/3/13 | 14.06 | 14.19 | 67964.7 | 41421.35 | 2.14 | 96.52 | 3234.3 | 295.9 | 6.1  |
| 1998/3/16 | 13.28 | 13.41 | 67964.7 | 41421.35 | 2.16 | 96.78 | 3211.2 | 295.1 | 6.06 |
| 1998/3/17 | 13.21 | 13.67 | 67964.7 | 41421.35 | 2.16 | 96.24 | 3209.9 | 292.3 | 5.8  |
| 1998/3/18 | 14.34 | 14.36 | 67964.7 | 41421.35 | 2.24 | 96.54 | 3204.4 | 291.6 | 5.89 |
| 1998/3/19 | 14.31 | 14.43 | 67964.7 | 41421.35 | 2.3  | 96.87 | 3208.1 | 292.1 | 5.86 |
| 1998/3/20 | 14.32 | 14.31 | 67964.7 | 41421.35 | 2.34 | 96.78 | 3218.4 | 292.2 | 6.11 |
| 1998/3/23 | 16.51 | 16.14 | 67964.7 | 41421.35 | 2.35 | 96.21 | 3209.2 | 299.5 | 6.36 |
| 1998/3/24 | 15.92 | 15.52 | 67964.7 | 41421.35 | 2.33 | 96.41 | 3188.6 | 299.9 | 6.32 |
| 1998/3/25 | 16.48 | 16.69 | 67964.7 | 41421.35 | 2.37 | 96.35 | 3200.5 | 299.4 | 6.17 |
| 1998/3/26 | 16.83 | 16.92 | 67964.7 | 41421.35 | 2.34 | 95.72 | 3194.5 | 301.8 | 6.35 |
| 1998/3/27 | 16.76 | 16.84 | 67964.7 | 41421.35 | 2.3  | 95.89 | 3172.1 | 303.1 | 6.31 |
| 1998/3/30 | 16.21 | 16.32 | 67964.7 | 41421.35 | 2.41 | 96.28 | 3176.3 | 301.4 | 6.3  |
| 1998/3/31 | 15.61 | 15.75 | 67964.7 | 41421.35 | 2.52 | 96.51 | 3190.4 | 300.5 | 6.47 |
| 1998/4/1  | 15.54 | 15.69 | 67829.6 | 39788.57 | 2.5  | 97.05 | 3198.7 | 299.5 | 6.33 |
| 1998/4/2  | 15.74 | 16.04 | 67829.6 | 39788.57 | 2.56 | 97.33 | 3201.1 | 301.9 | 6.53 |
| 1998/4/3  | 15.99 | 16.08 | 67829.6 | 39788.57 | 2.56 | 97.67 | 3209.7 | 308   | 6.58 |
| 1998/4/6  | 15.45 | 15.48 | 67829.6 | 39788.57 | 2.54 | 97.13 | 3221.8 | 309   | 6.37 |
| 1998/4/7  | 15.22 | 15.39 | 67829.6 | 39788.57 | 2.67 | 97.2  | 3203.9 | 309.6 | 6.38 |
| 1998/4/8  | 15.55 | 15.71 | 67829.6 | 39788.57 | 2.69 | 96.81 | 3200.7 | 308.8 | 6.39 |
| 1998/4/9  | 15.56 | 15.61 | 67829.6 | 39788.57 | 2.66 | 97.04 | 3192   | 308   | 6.4  |
| 1998/4/13 | 15.32 | 15.35 | 67829.6 | 39788.57 | 2.48 | 97.19 | 3193.5 | 310.8 | 6.35 |
| 1998/4/14 | 15.12 | 15.18 | 67829.6 | 39788.57 | 2.5  | 96.11 | 3202.6 | 307.9 | 6.27 |
| 1998/4/15 | 15.46 | 15.64 | 67829.6 | 39788.57 | 2.52 | 96.17 | 3166.6 | 307.1 | 6.3  |

|           |       |       |         |          |      |        |        |       |      |
|-----------|-------|-------|---------|----------|------|--------|--------|-------|------|
| 1998/4/16 | 15.9  | 15.97 | 67829.6 | 39788.57 | 2.48 | 95.86  | 3169.4 | 308   | 6.29 |
| 1998/4/17 | 15.46 | 15.49 | 67829.6 | 39788.57 | 2.48 | 96.17  | 3152.8 | 307.6 | 6.24 |
| 1998/4/20 | 15.41 | 15.52 | 67829.6 | 39788.57 | 2.47 | 96.57  | 3165.6 | 307.9 | 6.22 |
| 1998/4/21 | 15.45 | 15.57 | 67829.6 | 39788.57 | 2.56 | 96.8   | 3176.6 | 311.2 | 6.29 |
| 1998/4/22 | 15.54 | 15.07 | 67829.6 | 39788.57 | 2.4  | 96.83  | 3177.1 | 313.6 | 6.26 |
| 1998/4/23 | 15.19 | 13.09 | 67829.6 | 39788.57 | 2.33 | 97.26  | 3192.7 | 314.5 | 6.29 |
| 1998/4/24 | 15.09 | 13.23 | 67829.6 | 39788.57 | 2.34 | 97.13  | 3200.4 | 312.9 | 6.23 |
| 1998/4/27 | 15.32 | 15.43 | 67829.6 | 39788.57 | 2.27 | 96.84  | 3195.6 | 309.9 | 6.15 |
| 1998/4/28 | 15.74 | 15.9  | 67829.6 | 39788.57 | 2.26 | 97.28  | 3185.1 | 308.3 | 6.12 |
| 1998/4/29 | 15.32 | 15.43 | 67829.6 | 39788.57 | 2.3  | 96.95  | 3200.9 | 311.6 | 6.19 |
| 1998/4/30 | 15.39 | 15.56 | 67829.6 | 39788.57 | 2.22 | 96.94  | 3187   | 307.9 | 6.19 |
| 1998/5/1  | 16.13 | 16.25 | 67296.3 | 38030.84 | 2.26 | 97.43  | 3187   | 303.6 | 6.11 |
| 1998/5/4  | 15.95 | 15.98 | 67296.3 | 38030.84 | 2.26 | 97.4   | 3187   | 305.4 | 6.21 |
| 1998/5/5  | 15.47 | 15.48 | 67296.3 | 38030.84 | 2.22 | 97.7   | 3194.3 | 304.6 | 6.07 |
| 1998/5/6  | 15.37 | 15.45 | 67296.3 | 38030.84 | 2.14 | 97.82  | 3210.1 | 301.6 | 5.88 |
| 1998/5/7  | 15.24 | 15.26 | 67296.3 | 38030.84 | 2.16 | 98.53  | 3203.1 | 299.6 | 5.94 |
| 1998/5/8  | 15.13 | 15.21 | 67296.3 | 38030.84 | 2.17 | 99.09  | 3230.3 | 300.7 | 5.93 |
| 1998/5/11 | 15.17 | 15.26 | 67296.3 | 38030.84 | 2.22 | 99.53  | 3230.3 | 301.2 | 5.7  |
| 1998/5/12 | 15.24 | 15.21 | 67296.3 | 38030.84 | 2.26 | 99.49  | 3254.2 | 298.9 | 5.54 |
| 1998/5/13 | 14.95 | 15.01 | 67296.3 | 38030.84 | 2.2  | 99.5   | 3254.2 | 299.2 | 5.52 |
| 1998/5/14 | 15.08 | 15.15 | 67296.3 | 38030.84 | 2.2  | 99.45  | 3269.7 | 299.7 | 5.55 |
| 1998/5/15 | 14.47 | 14.51 | 67296.3 | 38030.84 | 2.18 | 99.93  | 3256.3 | 301.9 | 5.56 |
| 1998/5/18 | 14.07 | 14.15 | 67296.3 | 38030.84 | 2.13 | 99.96  | 3275.8 | 300.2 | 5.26 |
| 1998/5/19 | 12.96 | 13.01 | 67296.3 | 38030.84 | 2.15 | 100.02 | 3268.3 | 299.3 | 5.15 |
| 1998/5/20 | 14.18 | 13.36 | 67296.3 | 38030.84 | 2.17 | 99.41  | 3264.1 | 299.9 | 5.21 |
| 1998/5/21 | 14.63 | 14.21 | 67296.3 | 38030.84 | 2.07 | 99.51  | 3247.5 | 301.1 | 5.26 |
| 1998/5/22 | 14.78 | 14.81 | 67296.3 | 38030.84 | 2.09 | 99.59  | 3257.2 | 300   | 5.23 |
| 1998/5/26 | 14.82 | 14.9  | 67296.3 | 38030.84 | 2.1  | 99.33  | 3255.2 | 295.6 | 5.09 |
| 1998/5/27 | 14.99 | 14.98 | 67296.3 | 38030.84 | 2.02 | 99.61  | 3244.6 | 293.7 | 5.16 |
| 1998/5/28 | 14.85 | 14.88 | 67296.3 | 38030.84 | 2.07 | 99.77  | 3245.4 | 292.7 | 5.05 |
| 1998/5/29 | 15.2  | 15.21 | 67296.3 | 38030.84 | 2.17 | 99.59  | 3259.1 | 292.3 | 5.09 |
| 1998/6/1  | 14.96 | 14.99 | 67017.6 | 39714.4  | 2.19 | 98.8   | 3244.4 | 287.9 | 5.06 |
| 1998/6/2  | 14.84 | 14.81 | 67017.6 | 39714.4  | 2.16 | 98.84  | 3226.8 | 290.6 | 5.17 |
| 1998/6/3  | 14.81 | 14.94 | 67017.6 | 39714.4  | 2.11 | 98.78  | 3228.8 | 292.7 | 5.18 |
| 1998/6/4  | 15.12 | 15.24 | 67017.6 | 39714.4  | 2.02 | 99     | 3226.1 | 293.2 | 5.22 |
| 1998/6/5  | 15.07 | 15.13 | 67017.6 | 39714.4  | 2.03 | 99.12  | 3227.6 | 291.2 | 5.27 |
| 1998/6/8  | 14.55 | 14.49 | 67017.6 | 39714.4  | 1.98 | 99.15  | 3235.6 | 296   | 5.42 |
| 1998/6/9  | 13.85 | 13.76 | 67017.6 | 39714.4  | 1.94 | 98.98  | 3233.1 | 293.2 | 5.32 |
| 1998/6/10 | 13.48 | 13.54 | 67017.6 | 39714.4  | 1.93 | 99.48  | 3226.8 | 292.9 | 5.32 |
| 1998/6/11 | 12.75 | 12.67 | 67017.6 | 39714.4  | 1.97 | 99.48  | 3242.1 | 286.7 | 5.16 |
| 1998/6/12 | 12.59 | 12.66 | 67017.6 | 39714.4  | 2.04 | 99.21  | 3242.1 | 285.3 | 5.1  |
| 1998/6/15 | 11.56 | 11.69 | 67017.6 | 39714.4  | 2.1  | 99.03  | 3233.7 | 284.6 | 5.08 |
| 1998/6/16 | 11.98 | 12.38 | 67017.6 | 39714.4  | 1.99 | 98.03  | 3217.4 | 288.1 | 5.18 |
| 1998/6/17 | 12.6  | 12.55 | 67017.6 | 39714.4  | 2.17 | 97.13  | 3188.9 | 293   | 5.37 |
| 1998/6/18 | 11.77 | 11.8  | 67017.6 | 39714.4  | 2.14 | 96.83  | 3163.7 | 292.8 | 5.26 |
| 1998/6/19 | 11.84 | 11.8  | 67017.6 | 39714.4  | 2.28 | 96.86  | 3152.4 | 299   | 5.35 |
| 1998/6/22 | 13.43 | 13.54 | 67017.6 | 39714.4  | 2.36 | 96.78  | 3160.9 | 295.4 | 5.33 |
| 1998/6/23 | 14.52 | 14.65 | 67017.6 | 39714.4  | 2.39 | 97.18  | 3147.4 | 294.8 | 5.34 |
| 1998/6/24 | 14.6  | 14.54 | 67017.6 | 39714.4  | 2.34 | 97.13  | 3162.1 | 292.7 | 5.26 |
| 1998/6/25 | 14.03 | 13.9  | 67017.6 | 39714.4  | 2.36 | 96.89  | 3148   | 293.8 | 5.34 |
| 1998/6/26 | 14.13 | 14.21 | 67017.6 | 39714.4  | 2.36 | 97.41  | 3143.3 | 293.7 | 5.29 |
| 1998/6/29 | 14.07 | 14.29 | 67017.6 | 39714.4  | 2.39 | 97.18  | 3164.6 | 294.9 | 5.31 |
| 1998/6/30 | 14.18 | 14.3  | 67017.6 | 39714.4  | 2.47 | 97.1   | 3135.8 | 298.1 | 5.51 |
| 1998/7/1  | 14.37 | 14.47 | 66879.6 | 40385.19 | 2.45 | 97.14  | 3133.5 | 297.4 | 5.45 |

|           |       |       |         |          |      |       |        |       |      |
|-----------|-------|-------|---------|----------|------|-------|--------|-------|------|
| 1998/7/2  | 14.5  | 14.58 | 66879.6 | 40385.19 | 2.44 | 97.17 | 3146.4 | 295   | 5.3  |
| 1998/7/6  | 13.92 | 13.87 | 66879.6 | 40385.19 | 2.37 | 98.16 | 3172.8 | 294.3 | 5.3  |
| 1998/7/7  | 13.62 | 13.83 | 66879.6 | 40385.19 | 2.37 | 98.32 | 3181.1 | 295.9 | 5.37 |
| 1998/7/8  | 13.85 | 14.01 | 66879.6 | 40385.19 | 2.37 | 98.36 | 3185   | 294.2 | 5.33 |
| 1998/7/9  | 13.88 | 14.01 | 66879.6 | 40385.19 | 2.35 | 98.7  | 3190   | 292.5 | 5.32 |
| 1998/7/10 | 13.87 | 13.96 | 66879.6 | 40385.19 | 2.31 | 98.66 | 3201.6 | 291.6 | 5.27 |
| 1998/7/13 | 13.91 | 14.06 | 66879.6 | 40385.19 | 2.25 | 98.19 | 3184.2 | 292.4 | 5.3  |
| 1998/7/14 | 14.55 | 14.87 | 66879.6 | 40385.19 | 2.27 | 98.56 | 3181.2 | 294   | 5.29 |
| 1998/7/15 | 14.87 | 14.9  | 66879.6 | 40385.19 | 2.23 | 98.46 | 3189.2 | 294.5 | 5.31 |
| 1998/7/16 | 14.52 | 14.54 | 66879.6 | 40385.19 | 2.13 | 98.29 | 3187.8 | 294   | 5.3  |
| 1998/7/17 | 13.98 | 14.02 | 66879.6 | 40385.19 | 2.17 | 97.9  | 3177   | 295.1 | 5.34 |
| 1998/7/20 | 13.34 | 13.44 | 66879.6 | 40385.19 | 2.1  | 97.87 | 3168   | 296.7 | 5.44 |
| 1998/7/21 | 13.79 | 13.83 | 66879.6 | 40385.19 | 1.95 | 98.04 | 3163.4 | 295.5 | 5.51 |
| 1998/7/22 | 14.16 | 14.29 | 66879.6 | 40385.19 | 1.93 | 97.95 | 3172   | 294.6 | 5.64 |
| 1998/7/23 | 13.88 | 13.97 | 66879.6 | 40385.19 | 1.95 | 97.43 | 3171.3 | 293.7 | 5.78 |
| 1998/7/24 | 13.87 | 13.93 | 66879.6 | 40385.19 | 2.03 | 97.06 | 3151   | 291.2 | 5.69 |
| 1998/7/27 | 14.22 | 14.37 | 66879.6 | 40385.19 | 1.97 | 97.27 | 3138.7 | 290.2 | 5.63 |
| 1998/7/28 | 14.27 | 14.2  | 66879.6 | 40385.19 | 1.95 | 97.75 | 3136.1 | 291.7 | 5.65 |
| 1998/7/29 | 14.09 | 14.13 | 66879.6 | 40385.19 | 1.94 | 97.94 | 3152.9 | 289.9 | 5.58 |
| 1998/7/30 | 14.21 | 14.25 | 66879.6 | 40385.19 | 1.91 | 98.42 | 3161.7 | 288.9 | 5.52 |
| 1998/7/31 | 14.21 | 14.27 | 66879.6 | 40385.19 | 1.84 | 98.58 | 3066.6 | 286.3 | 5.46 |
| 1998/8/3  | 13.7  | 13.93 | 65905.5 | 39748.06 | 1.87 | 99.2  | 3073.8 | 284   | 5.36 |
| 1998/8/4  | 13.75 | 13.69 | 65905.5 | 39748.06 | 1.9  | 98.49 | 3079.2 | 288.8 | 5.45 |
| 1998/8/5  | 13.68 | 13.8  | 65905.5 | 39748.06 | 1.87 | 98.6  | 3059   | 288.2 | 5.41 |
| 1998/8/6  | 13.76 | 13.87 | 65905.5 | 39748.06 | 1.83 | 98.86 | 3063.5 | 287.8 | 5.43 |
| 1998/8/7  | 13.8  | 13.85 | 65905.5 | 39748.06 | 1.83 | 99.04 | 3065.7 | 287   | 5.27 |
| 1998/8/10 | 13.05 | 13.11 | 65905.5 | 39748.06 | 1.9  | 98.68 | 3072.8 | 287.8 | 5.31 |
| 1998/8/11 | 12.76 | 12.87 | 65905.5 | 39748.06 | 1.81 | 98.9  | 3064.4 | 284.5 | 5.18 |
| 1998/8/12 | 12.71 | 12.76 | 65905.5 | 39748.06 | 1.82 | 99.26 | 3060.3 | 282.8 | 5.14 |
| 1998/8/13 | 13.21 | 13.44 | 65905.5 | 39748.06 | 1.82 | 99.31 | 3068.3 | 285.3 | 5.19 |
| 1998/8/14 | 13.35 | 13.4  | 65905.5 | 39748.06 | 1.88 | 99.7  | 3065.7 | 283.9 | 5.15 |
| 1998/8/17 | 13.2  | 13.26 | 65905.5 | 39748.06 | 2.04 | 99.92 | 3015.5 | 285.3 | 5.11 |
| 1998/8/18 | 12.92 | 13.13 | 65905.5 | 39748.06 | 1.98 | 99.67 | 2816.6 | 285.3 | 5.07 |
| 1998/8/19 | 13.16 | 13.21 | 65905.5 | 39748.06 | 1.92 | 99.44 | 2773.4 | 283.9 | 5.07 |
| 1998/8/20 | 13.54 | 13.62 | 65905.5 | 39748.06 | 1.95 | 99.07 | 2757.8 | 285.6 | 5.15 |
| 1998/8/21 | 13.37 | 13.44 | 65905.5 | 39748.06 | 1.95 | 98.66 | 2742.5 | 285.2 | 5.17 |
| 1998/8/24 | 13.64 | 13.78 | 65905.5 | 39748.06 | 1.93 | 98.28 | 2684.3 | 285   | 5.13 |
| 1998/8/25 | 13.77 | 13.9  | 65905.5 | 39748.06 | 1.83 | 98.45 | 2433.5 | 283.3 | 5.01 |
| 1998/8/26 | 13.58 | 13.67 | 65905.5 | 39748.06 | 1.76 | 98.49 | 2434.5 | 282.2 | 4.97 |
| 1998/8/27 | 13.23 | 13.35 | 65905.5 | 39748.06 | 1.67 | 97.6  | 2430.9 | 276.7 | 4.86 |
| 1998/8/28 | 13.5  | 13.54 | 65905.5 | 39748.06 | 1.66 | 96    | 2394.9 | 275.4 | 4.63 |
| 1998/8/31 | 13.34 | 13.29 | 65905.5 | 39748.06 | 1.75 | 96.16 | 1456.1 | 276.5 | 4.62 |
| 1998/9/1  | 13.73 | 13.62 | 65986.6 | 39862.82 | 1.79 | 96.64 | 1246.4 | 279.8 | 4.73 |
| 1998/9/2  | 13.67 | 13.72 | 65986.6 | 39862.82 | 1.65 | 97    | 1059.4 | 281.1 | 4.78 |
| 1998/9/3  | 14.67 | 14.7  | 65986.6 | 39862.82 | 1.71 | 96.58 | 1010.3 | 286   | 4.89 |
| 1998/9/4  | 14.59 | 14.59 | 65986.6 | 39862.82 | 1.78 | 96.87 | 799.83 | 287.8 | 4.97 |
| 1998/9/8  | 14.29 | 14.34 | 65986.6 | 39862.82 | 1.87 | 97.71 | 657.29 | 286.9 | 4.85 |
| 1998/9/9  | 14.12 | 14.37 | 65986.6 | 39862.82 | 1.83 | 96.86 | 869.42 | 285.1 | 4.89 |
| 1998/9/10 | 14.67 | 14.71 | 65986.6 | 39862.82 | 1.96 | 95.81 | 1055   | 291.4 | 5    |
| 1998/9/11 | 14.34 | 14.39 | 65986.6 | 39862.82 | 1.88 | 96.69 | 1175.8 | 294.4 | 4.97 |
| 1998/9/14 | 14.42 | 14.46 | 65986.6 | 39862.82 | 1.95 | 96.49 | 1565   | 291   | 4.91 |
| 1998/9/15 | 14.57 | 14.72 | 65986.6 | 39862.82 | 2.12 | 96.51 | 1410.4 | 290.5 | 4.91 |
| 1998/9/16 | 14.53 | 14.6  | 65986.6 | 39862.82 | 2.24 | 96.43 | 1091.2 | 288   | 4.87 |
| 1998/9/17 | 14.86 | 15.07 | 65986.6 | 39862.82 | 2.14 | 96.15 | 926.66 | 291.2 | 4.94 |



|            |       |       |         |          |      |       |        |       |      |
|------------|-------|-------|---------|----------|------|-------|--------|-------|------|
| 1998/9/18  | 15.49 | 15.53 | 65986.6 | 39862.82 | 2.26 | 96.06 | 825.33 | 291.4 | 4.93 |
| 1998/9/21  | 15.49 | 15.58 | 65986.6 | 39862.82 | 2.19 | 96.2  | 825.03 | 288.8 | 4.81 |
| 1998/9/22  | 15.67 | 15.73 | 65986.6 | 39862.82 | 2.19 | 96.2  | 836.05 | 287.7 | 4.85 |
| 1998/9/23  | 15.81 | 15.8  | 65986.6 | 39862.82 | 2.13 | 95.92 | 854.24 | 289.7 | 5    |
| 1998/9/24  | 15.98 | 15.99 | 65986.6 | 39862.82 | 2.18 | 95.4  | 863.37 | 293.9 | 5.11 |
| 1998/9/25  | 15.75 | 15.8  | 65986.6 | 39862.82 | 2.18 | 95.24 | 843.83 | 293.7 | 5.13 |
| 1998/9/28  | 15.64 | 15.74 | 65986.6 | 39862.82 | 2.03 | 94.6  | 835.3  | 295.3 | 5.25 |
| 1998/9/29  | 15.98 | 16.01 | 65986.6 | 39862.82 | 2.35 | 94.6  | 827.79 | 294.2 | 5.36 |
| 1998/9/30  | 16.14 | 16.19 | 65986.6 | 39862.82 | 2.43 | 95.22 | 800.78 | 296.4 | 5.36 |
| 1998/10/1  | 15.43 | 15.52 | 66101.6 | 40000.67 | 2.03 | 94.94 | 801.33 | 299.6 | 5.3  |
| 1998/10/2  | 15.64 | 15.71 | 66101.6 | 40000.67 | 2.43 | 95.01 | 800.1  | 300.5 | 5.21 |
| 1998/10/5  | 15.39 | 15.24 | 66101.6 | 40000.67 | 2.39 | 95.88 | 811.6  | 296.9 | 5.07 |
| 1998/10/6  | 15.5  | 15.6  | 66101.6 | 40000.67 | 2.35 | 95.88 | 816.9  | 296.1 | 5.09 |
| 1998/10/7  | 15.06 | 15.03 | 66101.6 | 40000.67 | 2.39 | 94.95 | 818.62 | 300.7 | 5.14 |
| 1998/10/8  | 14.42 | 14.57 | 66101.6 | 40000.67 | 2.25 | 94.16 | 809.15 | 299.8 | 5    |
| 1998/10/9  | 14.58 | 14.64 | 66101.6 | 40000.67 | 2.19 | 94.65 | 800.82 | 296.3 | 4.8  |
| 1998/10/12 | 14.44 | 14.47 | 66101.6 | 40000.67 | 2.09 | 95.49 | 810.3  | 296.3 | 4.84 |
| 1998/10/13 | 14.23 | 14.27 | 66101.6 | 40000.67 | 2.08 | 94.51 | 853.61 | 296.6 | 4.84 |
| 1998/10/14 | 14.05 | 14.09 | 66101.6 | 40000.67 | 2.04 | 94.53 | 980.69 | 296   | 4.83 |
| 1998/10/15 | 14.05 | 14.08 | 66101.6 | 40000.67 | 2.1  | 94.34 | 938.43 | 297.5 | 4.9  |
| 1998/10/16 | 14.15 | 14.16 | 66101.6 | 40000.67 | 2.11 | 94.81 | 821.26 | 300   | 4.95 |
| 1998/10/19 | 13.35 | 13.39 | 66101.6 | 40000.67 | 2.14 | 95.03 | 747.56 | 296.1 | 4.89 |
| 1998/10/20 | 13.43 | 13.45 | 66101.6 | 40000.67 | 2.2  | 94.45 | 757.3  | 296.2 | 4.89 |
| 1998/10/21 | 14.08 | 14.14 | 66101.6 | 40000.67 | 2.18 | 95.12 | 756.05 | 295.2 | 4.89 |
| 1998/10/22 | 13.97 | 14    | 66101.6 | 40000.67 | 2.18 | 95.15 | 764.94 | 292.1 | 4.88 |
| 1998/10/23 | 14.05 | 14.06 | 66101.6 | 40000.67 | 2.16 | 95.58 | 769.23 | 292.7 | 4.88 |
| 1998/10/26 | 14.23 | 14.39 | 66101.6 | 40000.67 | 2.3  | 96.92 | 775.23 | 292.2 | 4.98 |
| 1998/10/27 | 14.13 | 14.19 | 66101.6 | 40000.67 | 2.11 | 96.46 | 782.59 | 293.5 | 4.95 |
| 1998/10/28 | 14.29 | 14.35 | 66101.6 | 40000.67 | 1.97 | 96.37 | 795.35 | 293.2 | 5.05 |
| 1998/10/29 | 14.24 | 14.31 | 66101.6 | 40000.67 | 2.35 | 96.08 | 807.37 | 294.8 | 5.08 |
| 1998/10/30 | 14.42 | 14.48 | 66101.6 | 40000.67 | 2.28 | 96.34 | 810.04 | 293.7 | 5.04 |
| 1998/11/2  | 14.36 | 14.45 | 66946.6 | 40520.74 | 2.39 | 97.13 | 778.81 | 290.9 | 5.03 |
| 1998/11/3  | 14.2  | 14.24 | 66946.6 | 40520.74 | 2.44 | 97.47 | 796.85 | 289.7 | 4.92 |
| 1998/11/4  | 14.14 | 14.09 | 66946.6 | 40520.74 | 2.4  | 97.44 | 801.14 | 291.8 | 4.94 |
| 1998/11/5  | 13.97 | 13.93 | 66946.6 | 40520.74 | 2.55 | 97.23 | 816.02 | 294.8 | 5.05 |
| 1998/11/6  | 13.87 | 13.93 | 66946.6 | 40520.74 | 2.55 | 97.36 | 825.19 | 294   | 5.01 |
| 1998/11/9  | 13.38 | 13.39 | 66946.6 | 40520.74 | 2.44 | 97.26 | 825.19 | 293.4 | 5.04 |
| 1998/11/10 | 13.52 | 13.54 | 66946.6 | 40520.74 | 2.48 | 97.44 | 797.74 | 294.2 | 4.99 |
| 1998/11/11 | 13.55 | 13.63 | 66946.6 | 40520.74 | 2.43 | 97.29 | 798.6  | 293.7 | 5    |
| 1998/11/12 | 13.84 | 14.04 | 66946.6 | 40520.74 | 2.39 | 97.4  | 779.07 | 297.5 | 5.13 |
| 1998/11/13 | 13.57 | 13.57 | 66946.6 | 40520.74 | 2.46 | 97.2  | 752.25 | 296.5 | 5.03 |
| 1998/11/16 | 12.82 | 12.81 | 66946.6 | 40520.74 | 2.31 | 96.46 | 734.35 | 295.6 | 4.93 |
| 1998/11/17 | 12.45 | 12.46 | 66946.6 | 40520.74 | 2.28 | 96.53 | 722.63 | 294.9 | 4.93 |
| 1998/11/18 | 12.14 | 12.33 | 66946.6 | 40520.74 | 2.2  | 96.94 | 724.96 | 298.2 | 4.97 |
| 1998/11/19 | 12.15 | 12.21 | 66946.6 | 40520.74 | 2.21 | 97.28 | 718.09 | 296.1 | 4.95 |
| 1998/11/20 | 12.14 | 12.2  | 66946.6 | 40520.74 | 2.16 | 97.6  | 730.22 | 296.4 | 4.89 |
| 1998/11/23 | 12.45 | 12.51 | 66946.6 | 40520.74 | 2.1  | 97.61 | 724.86 | 297.1 | 4.89 |
| 1998/11/24 | 12.12 | 11.48 | 66946.6 | 40520.74 | 2.15 | 97.39 | 714.74 | 296.4 | 4.88 |
| 1998/11/25 | 11.86 | 10.86 | 66946.6 | 40520.74 | 2.2  | 97.38 | 710.74 | 296.5 | 4.9  |
| 1998/11/30 | 11.22 | 11.37 | 66946.6 | 40520.74 | 1.98 | 98.12 | 627.34 | 292.5 | 4.83 |
| 1998/12/1  | 11.13 | 11.27 | 66771.7 | 42770.72 | 1.96 | 98.1  | 615.71 | 293.4 | 4.85 |
| 1998/12/2  | 11.24 | 11.31 | 66771.7 | 42770.72 | 1.89 | 97.33 | 603.74 | 292.7 | 4.66 |
| 1998/12/3  | 11.19 | 11.25 | 66771.7 | 42770.72 | 1.96 | 97.24 | 590.29 | 291.3 | 4.74 |
| 1998/12/4  | 11.17 | 11.2  | 66771.7 | 42770.72 | 1.98 | 97.54 | 567.87 | 292   | 4.74 |

|            |       |       |         |          |      |        |        |       |      |
|------------|-------|-------|---------|----------|------|--------|--------|-------|------|
| 1998/12/7  | 11.47 | 11.61 | 66771.7 | 42770.72 | 2.1  | 98.24  | 546.8  | 294.8 | 4.76 |
| 1998/12/8  | 11.3  | 11.33 | 66771.7 | 42770.72 | 1.91 | 97.86  | 549.57 | 293.3 | 4.76 |
| 1998/12/9  | 11.16 | 11.2  | 66771.7 | 42770.72 | 1.85 | 98.02  | 556.59 | 293.6 | 4.74 |
| 1998/12/10 | 10.72 | 10.82 | 66771.7 | 42770.72 | 1.84 | 96.9   | 565.43 | 294.1 | 4.76 |
| 1998/12/11 | 10.79 | 10.86 | 66771.7 | 42770.72 | 1.86 | 96.06  | 551.18 | 290.8 | 4.75 |
| 1998/12/14 | 11.29 | 11.3  | 66771.7 | 42770.72 | 1.95 | 95.8   | 551.18 | 291   | 4.85 |
| 1998/12/15 | 11.55 | 11.64 | 66771.7 | 42770.72 | 1.95 | 96.35  | 541.44 | 292.5 | 4.84 |
| 1998/12/16 | 12.38 | 12.55 | 66771.7 | 42770.72 | 1.99 | 97.16  | 533.92 | 294.7 | 5.03 |
| 1998/12/17 | 11.03 | 11.05 | 66771.7 | 42770.72 | 2.06 | 96.86  | 534.08 | 291.2 | 4.91 |
| 1998/12/18 | 10.95 | 10.95 | 66771.7 | 42770.72 | 2.07 | 96.44  | 532    | 288.8 | 4.9  |
| 1998/12/21 | 10.81 | 10.86 | 66771.7 | 42770.72 | 1.95 | 96.31  | 526.33 | 288.8 | 4.86 |
| 1998/12/22 | 11.12 | 10.99 | 66771.7 | 42770.72 | 1.93 | 96.54  | 533.28 | 287.7 | 4.87 |
| 1998/12/23 | 11.33 | 11.12 | 66771.7 | 42770.72 | 1.91 | 96.66  | 536.98 | 286.7 | 4.86 |
| 1998/12/24 | 11.23 | 11.03 | 66771.7 | 42770.72 | 1.88 | 96.89  | 556.42 | 286.3 | 4.89 |
| 1998/12/28 | 11.46 | 11.59 | 66771.7 | 42770.72 | 1.79 | 96.74  | 526.45 | 286.8 | 4.9  |
| 1998/12/29 | 11.72 | 11.82 | 66771.7 | 42770.72 | 1.77 | 96.4   | 535.67 | 286.1 | 5.01 |
| 1998/12/30 | 11.75 | 11.75 | 66771.7 | 42770.72 | 1.89 | 97.68  | 533.69 | 288.1 | 5    |
| 1998/12/31 | 12.05 | 12.14 | 66771.7 | 42770.72 | 1.95 | 98.07  | 494.49 | 289.2 | 4.99 |
| 1999/1/4   | 12.34 | 12.42 | 66986.7 | 40734.67 | 2.07 | 97     | 494.49 | 288.3 | 4.9  |
| 1999/1/5   | 11.99 | 12.04 | 66986.7 | 40734.67 | 1.98 | 97.32  | 497.39 | 287.8 | 5    |
| 1999/1/6   | 12.8  | 12.84 | 66986.7 | 40734.67 | 1.93 | 97.28  | 468.7  | 288.5 | 5.13 |
| 1999/1/7   | 13.09 | 12.99 | 66986.7 | 40734.67 | 1.84 | 97.53  | 468.7  | 292.4 | 5.2  |
| 1999/1/8   | 13.07 | 13.06 | 66986.7 | 40734.67 | 1.83 | 98.02  | 468.7  | 292   | 5.25 |
| 1999/1/11  | 13.44 | 13.43 | 66986.7 | 40734.67 | 1.78 | 98.69  | 449.6  | 293.6 | 5.32 |
| 1999/1/12  | 12.89 | 12.91 | 66986.7 | 40734.67 | 1.82 | 98.5   | 461.82 | 289.3 | 5.21 |
| 1999/1/13  | 12.31 | 12.33 | 66986.7 | 40734.67 | 1.77 | 97.55  | 476.73 | 287   | 5.16 |
| 1999/1/14  | 12.15 | 12.23 | 66986.7 | 40734.67 | 1.81 | 97.17  | 479.96 | 287.4 | 5.15 |
| 1999/1/15  | 12.11 | 12.21 | 66986.7 | 40734.67 | 1.8  | 97.5   | 468.7  | 287.4 | 5.1  |
| 1999/1/19  | 12.08 | 12.13 | 66986.7 | 40734.67 | 1.82 | 97.13  | 448.18 | 286.8 | 5.11 |
| 1999/1/20  | 11.81 | 11.82 | 66986.7 | 40734.67 | 1.83 | 97.71  | 458.71 | 287.5 | 5.14 |
| 1999/1/21  | 12.46 | 12.45 | 66986.7 | 40734.67 | 1.89 | 97.4   | 453.44 | 288   | 5.1  |
| 1999/1/22  | 12.69 | 12.62 | 66986.7 | 40734.67 | 1.78 | 97.23  | 452.35 | 286.7 | 5.07 |
| 1999/1/25  | 12.44 | 12.41 | 66986.7 | 40734.67 | 1.71 | 97.02  | 447.11 | 288   | 5.16 |
| 1999/1/26  | 12.06 | 12.16 | 66986.7 | 40734.67 | 1.71 | 96.98  | 448.77 | 286.3 | 5.1  |
| 1999/1/27  | 12.32 | 12.4  | 66986.7 | 40734.67 | 1.81 | 97.63  | 452.23 | 283.4 | 5.08 |
| 1999/1/28  | 12.45 | 12.52 | 66986.7 | 40734.67 | 1.86 | 97.59  | 453.08 | 284.8 | 5.25 |
| 1999/1/29  | 12.75 | 12.81 | 66986.7 | 40734.67 | 1.78 | 97.78  | 456.49 | 286.3 | 5.24 |
| 1999/2/1   | 12.37 | 12.36 | 67312.6 | 42595.19 | 1.74 | 97.93  | 436.18 | 289.2 | 5.31 |
| 1999/2/2   | 12.3  | 12.21 | 67312.6 | 42595.19 | 1.82 | 98.18  | 433.52 | 289.3 | 5.47 |
| 1999/2/3   | 12.38 | 12.42 | 67312.6 | 42595.19 | 1.77 | 98.38  | 432.14 | 288   | 5.54 |
| 1999/2/4   | 12.02 | 11.94 | 67312.6 | 42595.19 | 1.83 | 97.91  | 431.34 | 290.2 | 5.76 |
| 1999/2/5   | 11.8  | 11.85 | 67312.6 | 42595.19 | 1.8  | 98.54  | 429.98 | 289.6 | 5.64 |
| 1999/2/8   | 11.67 | 11.65 | 67312.6 | 42595.19 | 1.82 | 98.24  | 433.87 | 290.4 | 5.62 |
| 1999/2/9   | 11.68 | 11.66 | 67312.6 | 42595.19 | 1.84 | 98.3   | 435.14 | 288.4 | 5.51 |
| 1999/2/10  | 11.75 | 11.88 | 67312.6 | 42595.19 | 1.78 | 98.94  | 439.35 | 288   | 5.49 |
| 1999/2/11  | 11.85 | 11.94 | 67312.6 | 42595.19 | 1.84 | 99.16  | 441.25 | 288.6 | 5.57 |
| 1999/2/12  | 11.88 | 11.9  | 67312.6 | 42595.19 | 1.81 | 98.43  | 439.59 | 290.5 | 5.66 |
| 1999/2/16  | 11.37 | 11.38 | 67312.6 | 42595.19 | 1.8  | 98.48  | 434.67 | 286.9 | 5.45 |
| 1999/2/17  | 11.53 | 11.49 | 67312.6 | 42595.19 | 1.78 | 98.46  | 436.07 | 285.9 | 5.41 |
| 1999/2/18  | 12.04 | 11.97 | 67312.6 | 42595.19 | 1.75 | 98.43  | 435.37 | 287.1 | 5.48 |
| 1999/2/19  | 11.76 | 11.79 | 67312.6 | 42595.19 | 1.75 | 99.13  | 437.58 | 289.5 | 5.6  |
| 1999/2/22  | 11.96 | 11.97 | 67312.6 | 42595.19 | 1.7  | 99.03  | 441.01 | 289   | 5.46 |
| 1999/2/23  | 12.48 | 12.44 | 67312.6 | 42595.19 | 1.71 | 99.71  | 440.89 | 289.7 | 5.46 |
| 1999/2/24  | 12.61 | 12.49 | 67312.6 | 42595.19 | 1.67 | 100.75 | 444.25 | 289.2 | 5.37 |

|           |       |       |         |          |      |        |        |       |      |
|-----------|-------|-------|---------|----------|------|--------|--------|-------|------|
| 1999/2/25 | 12.68 | 12.61 | 67312.6 | 42595.19 | 1.66 | 100.47 | 447.17 | 289.2 | 5.55 |
| 1999/2/26 | 12.27 | 12.31 | 67312.6 | 42595.19 | 1.63 | 100.5  | 446.92 | 288.3 | 5.64 |
| 1999/3/1  | 12.24 | 12.28 | 66988.7 | 43380.35 | 1.7  | 100.3  | 436.15 | 287.7 | 5.53 |
| 1999/3/2  | 12.51 | 12.66 | 66988.7 | 43380.35 | 1.7  | 99.83  | 433.9  | 288   | 5.33 |
| 1999/3/3  | 12.93 | 12.92 | 66988.7 | 43380.35 | 1.72 | 100.04 | 431.79 | 288.3 | 5.26 |
| 1999/3/4  | 13.35 | 13.32 | 66988.7 | 43380.35 | 1.76 | 100.24 | 431.09 | 289.5 | 5.28 |
| 1999/3/5  | 13.3  | 13.33 | 66988.7 | 43380.35 | 1.85 | 100.53 | 430.28 | 289.5 | 5.21 |
| 1999/3/8  | 13.63 | 13.63 | 66988.7 | 43380.35 | 1.86 | 100.24 | 430.28 | 292.7 | 5.3  |
| 1999/3/9  | 13.85 | 13.78 | 66988.7 | 43380.35 | 1.93 | 99.8   | 430.86 | 293.4 | 5.25 |
| 1999/3/10 | 14.69 | 14.74 | 66988.7 | 43380.35 | 1.94 | 99.23  | 430.28 | 294.2 | 5.28 |
| 1999/3/11 | 14.31 | 14.3  | 66988.7 | 43380.35 | 1.82 | 98.63  | 426.6  | 295.5 | 5.35 |
| 1999/3/12 | 14.49 | 14.51 | 66988.7 | 43380.35 | 1.76 | 98.69  | 422.99 | 293.4 | 5.32 |
| 1999/3/15 | 14.45 | 14.48 | 66988.7 | 43380.35 | 1.72 | 99.27  | 422.32 | 287.6 | 5.11 |
| 1999/3/16 | 14.46 | 14.6  | 66988.7 | 43380.35 | 1.72 | 98.96  | 422.54 | 283.9 | 5.06 |
| 1999/3/17 | 15.05 | 15.11 | 66988.7 | 43380.35 | 1.75 | 98.96  | 419.44 | 284.1 | 5.05 |
| 1999/3/18 | 15    | 15.11 | 66988.7 | 43380.35 | 1.69 | 99.05  | 414.43 | 283.5 | 5.02 |
| 1999/3/19 | 15.24 | 15.26 | 66988.7 | 43380.35 | 1.7  | 99.01  | 414.22 | 284.5 | 5.05 |
| 1999/3/22 | 15.5  | 15.39 | 66988.7 | 43380.35 | 1.77 | 99.08  | 410.81 | 284.8 | 5.11 |
| 1999/3/23 | 15.51 | 15.36 | 66988.7 | 43380.35 | 1.75 | 99.02  | 404.37 | 284.7 | 5.11 |
| 1999/3/24 | 15.34 | 15.18 | 66988.7 | 43380.35 | 1.76 | 98.74  | 403.14 | 284.1 | 5.08 |
| 1999/3/25 | 15.67 | 15.66 | 66988.7 | 43380.35 | 1.84 | 99.41  | 404.37 | 283.1 | 5.11 |
| 1999/3/26 | 16.17 | 16.16 | 66988.7 | 43380.35 | 1.85 | 99.41  | 406.53 | 279.7 | 5.1  |
| 1999/3/29 | 16.44 | 16.46 | 66988.7 | 43380.35 | 1.85 | 99.87  | 407.15 | 280.3 | 5.12 |
| 1999/3/30 | 16.8  | 16.66 | 66988.7 | 43380.35 | 1.98 | 100.05 | 409.02 | 279.2 | 5    |
| 1999/3/31 | 16.76 | 16.66 | 66988.7 | 43380.35 | 2.01 | 100.08 | 400.19 | 279.8 | 4.97 |
| 1999/4/1  | 16.64 | 16.65 | 65545.7 | 40215.49 | 1.85 | 100.34 | 397.53 | 279.9 | 5.03 |
| 1999/4/5  | 16.95 | 16.94 | 65545.7 | 40215.49 | 2.03 | 100.5  | 386.87 | 278.3 | 4.92 |
| 1999/4/6  | 16.81 | 16.79 | 65545.7 | 40215.49 | 2.01 | 100.98 | 387.35 | 279.8 | 4.95 |
| 1999/4/7  | 16.03 | 16.02 | 65545.7 | 40215.49 | 2.02 | 100.81 | 389.58 | 280.3 | 4.96 |
| 1999/4/8  | 15.83 | 15.92 | 65545.7 | 40215.49 | 2.07 | 100.2  | 387.83 | 280.7 | 4.89 |
| 1999/4/9  | 16.57 | 16.59 | 65545.7 | 40215.49 | 2.1  | 100.06 | 387.73 | 281.5 | 4.93 |
| 1999/4/12 | 16.4  | 16.44 | 65545.7 | 40215.49 | 2.13 | 99.77  | 387.06 | 282.8 | 4.9  |
| 1999/4/13 | 16.72 | 16.73 | 65545.7 | 40215.49 | 2.14 | 99.53  | 387.73 | 284.1 | 4.91 |
| 1999/4/14 | 16.47 | 16.51 | 65545.7 | 40215.49 | 2.1  | 99.81  | 388.22 | 281.6 | 4.86 |
| 1999/4/15 | 16.87 | 16.85 | 65545.7 | 40215.49 | 2.14 | 99.97  | 389.87 | 283.7 | 5.01 |
| 1999/4/16 | 17.33 | 17.34 | 65545.7 | 40215.49 | 2.12 | 99.7   | 391.24 | 284.1 | 5.04 |
| 1999/4/19 | 17.8  | 17.82 | 65545.7 | 40215.49 | 2.17 | 99.87  | 389.67 | 284.8 | 5.15 |
| 1999/4/20 | 17.78 | 17.79 | 65545.7 | 40215.49 | 2.14 | 99.94  | 390.16 | 284.4 | 5.13 |
| 1999/4/21 | 17.92 | 18.05 | 65545.7 | 40215.49 | 2.17 | 100.15 | 391.14 | 284   | 5.16 |
| 1999/4/22 | 18.18 | 18.02 | 65545.7 | 40215.49 | 2.23 | 99.54  | 393.12 | 283.9 | 5.17 |
| 1999/4/23 | 17.94 | 17.96 | 65545.7 | 40215.49 | 2.23 | 99.56  | 391.44 | 283.6 | 5.15 |
| 1999/4/26 | 17.66 | 17.67 | 65545.7 | 40215.49 | 2.3  | 99.84  | 393.22 | 281.3 | 5.1  |
| 1999/4/27 | 17.81 | 17.82 | 65545.7 | 40215.49 | 2.33 | 99.5   | 396.32 | 282.3 | 5.18 |
| 1999/4/28 | 18.45 | 18.43 | 65545.7 | 40215.49 | 2.35 | 99.69  | 396.32 | 282.9 | 5.25 |
| 1999/4/29 | 18.53 | 18.53 | 65545.7 | 40215.49 | 2.34 | 99.92  | 398.14 | 287.3 | 5.39 |
| 1999/4/30 | 18.66 | 18.69 | 65545.7 | 40215.49 | 2.25 | 99.98  | 392.68 | 287.8 | 5.41 |
| 1999/5/3  | 18.85 | 18.83 | 65352.7 | 38692.54 | 2.31 | 100.27 | 392.68 | 287.6 | 5.36 |
| 1999/5/4  | 18.92 | 18.94 | 65352.7 | 38692.54 | 2.36 | 99.1   | 392.68 | 286.9 | 5.3  |
| 1999/5/5  | 18.98 | 18.89 | 65352.7 | 38692.54 | 2.36 | 98.62  | 389.68 | 288.5 | 5.37 |
| 1999/5/6  | 18.32 | 18.23 | 65352.7 | 38692.54 | 2.3  | 98.47  | 388.49 | 290.7 | 5.35 |
| 1999/5/7  | 18.22 | 18.23 | 65352.7 | 38692.54 | 2.27 | 98.97  | 387.99 | 283.7 | 5.41 |
| 1999/5/10 | 18.5  | 18.57 | 65352.7 | 38692.54 | 2.3  | 99.22  | 387.99 | 278.4 | 5.39 |
| 1999/5/11 | 18.06 | 17.84 | 65352.7 | 38692.54 | 2.24 | 99.41  | 391.67 | 278.8 | 5.38 |
| 1999/5/12 | 17.57 | 17.44 | 65352.7 | 38692.54 | 2.19 | 99.72  | 392.68 | 277.8 | 5.36 |

|           |       |       |         |          |      |        |        |       |      |
|-----------|-------|-------|---------|----------|------|--------|--------|-------|------|
| 1999/5/13 | 18.03 | 18.11 | 65352.7 | 38692.54 | 2.28 | 99.51  | 382.46 | 278.1 | 5.54 |
| 1999/5/14 | 18.04 | 18.04 | 65352.7 | 38692.54 | 2.29 | 99.62  | 378.76 | 276.2 | 5.36 |
| 1999/5/17 | 17.94 | 17.76 | 65352.7 | 38692.54 | 2.34 | 99.72  | 379.8  | 274.8 | 5.36 |
| 1999/5/18 | 17.11 | 17.09 | 65352.7 | 38692.54 | 2.26 | 99.42  | 380.36 | 274.2 | 5.31 |
| 1999/5/19 | 16.88 | 16.77 | 65352.7 | 38692.54 | 2.25 | 99.6   | 381.31 | 273.5 | 5.26 |
| 1999/5/20 | 17.03 | 17.04 | 65352.7 | 38692.54 | 2.22 | 100.36 | 383.13 | 274.7 | 5.29 |
| 1999/5/21 | 17.41 | 17.22 | 65352.7 | 38692.54 | 2.23 | 100.72 | 385.74 | 273.3 | 5.18 |
| 1999/5/24 | 17.06 | 16.77 | 65352.7 | 38692.54 | 2.18 | 100.96 | 388.19 | 272.9 | 5.03 |
| 1999/5/25 | 17.14 | 17.25 | 65352.7 | 38692.54 | 2.2  | 100.49 | 389.68 | 270.8 | 5.04 |
| 1999/5/26 | 17.35 | 17.32 | 65352.7 | 38692.54 | 2.23 | 101.19 | 389.18 | 269.5 | 5.04 |
| 1999/5/27 | 17.17 | 17.18 | 65352.7 | 38692.54 | 2.28 | 100.96 | 391.67 | 270.5 | 4.94 |
| 1999/5/28 | 16.84 | 16.85 | 65352.7 | 38692.54 | 2.36 | 100.73 | 391.37 | 270.4 | 4.9  |
| 1999/6/1  | 16.34 | 16.31 | 64307.9 | 40550.79 | 2.34 | 100.04 | 383.21 | 268.2 | 4.99 |
| 1999/6/2  | 16.65 | 16.61 | 64307.9 | 40550.79 | 2.41 | 100.46 | 380.97 | 265.9 | 4.98 |
| 1999/6/3  | 16.74 | 16.81 | 64307.9 | 40550.79 | 2.4  | 100.35 | 382.82 | 266.4 | 4.94 |
| 1999/6/4  | 17.32 | 17.36 | 64307.9 | 40550.79 | 2.44 | 99.97  | 383.41 | 266   | 4.94 |
| 1999/6/7  | 17.86 | 17.91 | 64307.9 | 40550.79 | 2.44 | 100.67 | 382.63 | 266.1 | 4.98 |
| 1999/6/8  | 17.66 | 17.66 | 64307.9 | 40550.79 | 2.39 | 100.35 | 384.39 | 262.8 | 4.94 |
| 1999/6/9  | 17.99 | 17.98 | 64307.9 | 40550.79 | 2.46 | 100.56 | 384    | 260.2 | 5.03 |
| 1999/6/10 | 17.85 | 17.82 | 64307.9 | 40550.79 | 2.36 | 100.42 | 384.99 | 259.3 | 5.1  |
| 1999/6/11 | 18.43 | 18.45 | 64307.9 | 40550.79 | 2.38 | 99.63  | 383.51 | 261.5 | 5.12 |
| 1999/6/14 | 18.33 | 18.24 | 64307.9 | 40550.79 | 2.37 | 100.23 | 383.51 | 261.1 | 5.11 |
| 1999/6/15 | 18.55 | 18.61 | 64307.9 | 40550.79 | 2.37 | 101.01 | 384    | 260.1 | 5.05 |
| 1999/6/16 | 17.94 | 17.92 | 64307.9 | 40550.79 | 2.33 | 101.41 | 387.68 | 259.1 | 5.03 |
| 1999/6/17 | 18.19 | 18.25 | 64307.9 | 40550.79 | 2.29 | 101.1  | 388.89 | 259.3 | 5.07 |
| 1999/6/18 | 17.99 | 18.01 | 64307.9 | 40550.79 | 2.31 | 100.87 | 387.78 | 260.3 | 4.96 |
| 1999/6/21 | 17.7  | 17.79 | 64307.9 | 40550.79 | 2.24 | 101.2  | 387.68 | 259.8 | 5.02 |
| 1999/6/22 | 17.61 | 17.62 | 64307.9 | 40550.79 | 2.24 | 101.22 | 388.69 | 259.4 | 5.04 |
| 1999/6/23 | 18.45 | 18.42 | 64307.9 | 40550.79 | 2.26 | 101.92 | 388.48 | 261.4 | 5.11 |
| 1999/6/24 | 18.29 | 18.26 | 64307.9 | 40550.79 | 2.3  | 101.51 | 391.84 | 262   | 5.13 |
| 1999/6/25 | 18.39 | 18.17 | 64307.9 | 40550.79 | 2.26 | 101.48 | 389.19 | 260.4 | 5.07 |
| 1999/6/28 | 18.23 | 18.22 | 64307.9 | 40550.79 | 2.26 | 101.84 | 390.1  | 261.5 | 5.15 |
| 1999/6/29 | 18.44 | 18.56 | 64307.9 | 40550.79 | 2.4  | 102.39 | 391.02 | 262   | 5.21 |
| 1999/6/30 | 19.29 | 19.33 | 64307.9 | 40550.79 | 2.39 | 102.03 | 379.88 | 263.6 | 5.29 |
| 1999/7/1  | 19.39 | 19.39 | 65819   | 40776.97 | 2.26 | 101.52 | 378.79 | 264.4 | 5.3  |
| 1999/7/2  | 19.69 | 19.7  | 65819   | 40776.97 | 2.29 | 101.16 | 378.29 | 264.6 | 5.36 |
| 1999/7/6  | 19.78 | 19.78 | 65819   | 40776.97 | 2.19 | 102.19 | 375.54 | 257.8 | 5.23 |
| 1999/7/7  | 19.77 | 19.98 | 65819   | 40776.97 | 2.14 | 102.58 | 378.98 | 258   | 5.25 |
| 1999/7/8  | 19.71 | 19.76 | 65819   | 40776.97 | 2.16 | 102.47 | 380.58 | 257.7 | 5.27 |
| 1999/7/9  | 19.94 | 19.94 | 65819   | 40776.97 | 2.16 | 103.14 | 380.38 | 258.1 | 5.26 |
| 1999/7/12 | 19.91 | 19.92 | 65819   | 40776.97 | 2.14 | 102.6  | 382.39 | 256.5 | 5.25 |
| 1999/7/13 | 20.15 | 20.33 | 65819   | 40776.97 | 2.18 | 102.47 | 381.68 | 256.7 | 5.15 |
| 1999/7/14 | 19.92 | 19.89 | 65819   | 40776.97 | 2.15 | 102.17 | 381.58 | 255   | 5.1  |
| 1999/7/15 | 20.16 | 20.26 | 65819   | 40776.97 | 2.18 | 102.07 | 380.38 | 254.8 | 5.12 |
| 1999/7/16 | 20.62 | 20.66 | 65819   | 40776.97 | 2.19 | 102.2  | 379.98 | 254.5 | 5.09 |
| 1999/7/19 | 20.44 | 20.28 | 65819   | 40776.97 | 2.21 | 101.05 | 381.78 | 253.9 | 5.06 |
| 1999/7/20 | 19.37 | 19.38 | 65819   | 40776.97 | 2.2  | 101.62 | 378.29 | 254.1 | 5.06 |
| 1999/7/21 | 19.65 | 19.54 | 65819   | 40776.97 | 2.25 | 101.17 | 379.88 | 256.3 | 5.12 |
| 1999/7/22 | 19.94 | 19.84 | 65819   | 40776.97 | 2.4  | 100.93 | 378.69 | 256.7 | 5.14 |
| 1999/7/23 | 20.63 | 20.41 | 65819   | 40776.97 | 2.53 | 101.17 | 377.7  | 255.4 | 5.15 |
| 1999/7/26 | 20.52 | 20.49 | 65819   | 40776.97 | 2.54 | 100.45 | 377.99 | 254.7 | 5.14 |
| 1999/7/27 | 20.38 | 20.4  | 65819   | 40776.97 | 2.57 | 100.39 | 375.74 | 254.5 | 5.17 |
| 1999/7/28 | 20.54 | 20.61 | 65819   | 40776.97 | 2.6  | 99.98  | 375.25 | 254.5 | 5.24 |
| 1999/7/29 | 20.97 | 21.09 | 65819   | 40776.97 | 2.57 | 98.74  | 374.28 | 257.3 | 5.44 |

|            |       |       |       |          |      |        |        |       |      |
|------------|-------|-------|-------|----------|------|--------|--------|-------|------|
| 1999/7/30  | 20.53 | 20.52 | 65819 | 40776.97 | 2.54 | 98.49  | 370.55 | 256.9 | 5.47 |
| 1999/8/2   | 20.45 | 20.46 | 65706 | 41404.47 | 2.58 | 98.77  | 367.13 | 256.2 | 5.39 |
| 1999/8/3   | 20.3  | 20.21 | 65706 | 41404.47 | 2.6  | 98.58  | 366.57 | 257   | 5.46 |
| 1999/8/4   | 20.44 | 20.49 | 65706 | 41404.47 | 2.64 | 98.66  | 364.33 | 257.3 | 5.51 |
| 1999/8/5   | 20.56 | 20.67 | 65706 | 41404.47 | 2.65 | 99.07  | 363.32 | 256.7 | 5.44 |
| 1999/8/6   | 20.88 | 20.89 | 65706 | 41404.47 | 2.7  | 99.21  | 362.04 | 257.1 | 5.41 |
| 1999/8/9   | 21.27 | 21.26 | 65706 | 41404.47 | 2.72 | 99.46  | 353.04 | 257.5 | 5.34 |
| 1999/8/10  | 21.3  | 21.31 | 65706 | 41404.47 | 2.75 | 98.9   | 357.53 | 258.7 | 5.34 |
| 1999/8/11  | 21.52 | 21.54 | 65706 | 41404.47 | 2.7  | 99.02  | 356.02 | 260.2 | 5.42 |
| 1999/8/12  | 21.48 | 21.42 | 65706 | 41404.47 | 2.72 | 99.11  | 358.24 | 261.7 | 5.37 |
| 1999/8/13  | 21.67 | 21.67 | 65706 | 41404.47 | 2.75 | 99.41  | 357.44 | 261.7 | 5.32 |
| 1999/8/16  | 21.36 | 21.34 | 65706 | 41404.47 | 2.7  | 99.77  | 359.41 | 260.9 | 5.26 |
| 1999/8/17  | 21.74 | 21.7  | 65706 | 41404.47 | 2.71 | 99.64  | 362.31 | 262.1 | 5.27 |
| 1999/8/18  | 21.52 | 21.54 | 65706 | 41404.47 | 2.79 | 99.7   | 363.41 | 260.3 | 5.24 |
| 1999/8/19  | 21.77 | 21.86 | 65706 | 41404.47 | 2.9  | 98.85  | 364.33 | 259.4 | 5.22 |
| 1999/8/20  | 21.65 | 21.66 | 65706 | 41404.47 | 2.94 | 99.01  | 357.8  | 258.3 | 5.26 |
| 1999/8/23  | 21.84 | 21.61 | 65706 | 41404.47 | 3.06 | 99.7   | 358.06 | 255   | 5.15 |
| 1999/8/24  | 21.47 | 21.36 | 65706 | 41404.47 | 3.06 | 100.25 | 362.31 | 253.5 | 5.15 |
| 1999/8/25  | 20.58 | 20.66 | 65706 | 41404.47 | 3.03 | 100.76 | 364.33 | 253   | 5.1  |
| 1999/8/26  | 20.95 | 21.09 | 65706 | 41404.47 | 2.95 | 100.62 | 365.26 | 253.2 | 5.13 |
| 1999/8/27  | 21.27 | 21.31 | 65706 | 41404.47 | 2.91 | 100.6  | 364.7  | 253.9 | 5.1  |
| 1999/8/30  | 22.01 | 21.93 | 65706 | 41404.47 | 2.97 | 100.53 | 365.07 | 255.1 | 5.09 |
| 1999/8/31  | 22.11 | 22.15 | 65706 | 41404.47 | 2.83 | 99.52  | 359.51 | 256.7 | 5.15 |
| 1999/9/1   | 21.99 | 21.79 | 65748 | 41653.94 | 2.74 | 99.53  | 350.64 | 255   | 5.12 |
| 1999/9/2   | 21.49 | 21.54 | 65748 | 41653.94 | 2.47 | 99.26  | 342.93 | 256.1 | 5.19 |
| 1999/9/3   | 22    | 22    | 65748 | 41653.94 | 2.56 | 99.49  | 342.11 | 255   | 5.12 |
| 1999/9/7   | 22.61 | 22.58 | 65748 | 41653.94 | 2.68 | 99.38  | 343.76 | 256.6 | 5.17 |
| 1999/9/8   | 22.66 | 22.64 | 65748 | 41653.94 | 2.61 | 98.52  | 343.85 | 257   | 5.18 |
| 1999/9/9   | 23.2  | 23.24 | 65748 | 41653.94 | 2.85 | 97.73  | 340.38 | 257.9 | 5.19 |
| 1999/9/10  | 23.55 | 23.55 | 65748 | 41653.94 | 2.8  | 98.63  | 338.76 | 257.1 | 5.18 |
| 1999/9/13  | 24.21 | 24.18 | 65748 | 41653.94 | 2.78 | 99.25  | 343.18 | 257   | 5.14 |
| 1999/9/14  | 23.86 | 23.86 | 65748 | 41653.94 | 2.64 | 99.41  | 345.77 | 257.4 | 5.11 |
| 1999/9/15  | 24.13 | 24.1  | 65748 | 41653.94 | 2.63 | 98.87  | 347.46 | 256.6 | 5.07 |
| 1999/9/16  | 24.51 | 24.52 | 65748 | 41653.94 | 2.55 | 98.3   | 345.43 | 256.7 | 5.09 |
| 1999/9/17  | 24.72 | 24.72 | 65748 | 41653.94 | 2.61 | 98.39  | 345.69 | 255.1 | 5.09 |
| 1999/9/20  | 24.29 | 24.32 | 65748 | 41653.94 | 2.52 | 98.49  | 344.51 | 255   | 5.09 |
| 1999/9/21  | 24.46 | 24.48 | 65748 | 41653.94 | 2.43 | 97.77  | 345.69 | 260.8 | 5.25 |
| 1999/9/22  | 24.12 | 24.26 | 65748 | 41653.94 | 2.43 | 97.99  | 343.93 | 264.3 | 5.26 |
| 1999/9/23  | 24.87 | 24.76 | 65748 | 41653.94 | 2.7  | 97.39  | 344.43 | 265.5 | 5.25 |
| 1999/9/24  | 24.76 | 24.81 | 65748 | 41653.94 | 2.63 | 97.19  | 341.53 | 267.9 | 5.23 |
| 1999/9/27  | 24.61 | 24.63 | 65748 | 41653.94 | 2.63 | 96.93  | 341.94 | 281.9 | 5.33 |
| 1999/9/28  | 24.33 | 24.52 | 65748 | 41653.94 | 2.56 | 96.71  | 342.19 | 308.1 | 5.74 |
| 1999/9/29  | 24.69 | 24.69 | 65748 | 41653.94 | 2.82 | 97.13  | 343.85 | 300.6 | 5.61 |
| 1999/9/30  | 24.51 | 24.54 | 65748 | 41653.94 | 2.74 | 96.99  | 339.8  | 297.9 | 5.62 |
| 1999/10/1  | 24.54 | 24.51 | 66254 | 41174.91 | 2.79 | 96.2   | 336.85 | 303.7 | 5.58 |
| 1999/10/4  | 23.76 | 23.71 | 66254 | 41174.91 | 2.63 | 96.13  | 331.66 | 316.4 | 5.63 |
| 1999/10/5  | 23.45 | 23.37 | 66254 | 41174.91 | 2.59 | 96.13  | 326.78 | 324.4 | 5.56 |
| 1999/10/6  | 23.27 | 23.24 | 66254 | 41174.91 | 2.6  | 96.19  | 328.16 | 324.5 | 5.53 |
| 1999/10/7  | 22.45 | 22.46 | 66254 | 41174.91 | 2.64 | 96.33  | 328.86 | 322.8 | 5.6  |
| 1999/10/8  | 20.9  | 20.81 | 66254 | 41174.91 | 2.69 | 96.3   | 329.25 | 320.2 | 5.55 |
| 1999/10/11 | 21.27 | 21.58 | 66254 | 41174.91 | 2.83 | 96.22  | 329.17 | 318.8 | 5.53 |
| 1999/10/12 | 22.3  | 22.93 | 66254 | 41174.91 | 2.93 | 96.09  | 328.63 | 316.7 | 5.57 |
| 1999/10/13 | 23.06 | 22.93 | 66254 | 41174.91 | 2.97 | 96.24  | 328.55 | 320.3 | 5.6  |
| 1999/10/14 | 22.45 | 22.46 | 66254 | 41174.91 | 2.83 | 95.74  | 329.32 | 312.7 | 5.34 |

|            |       |       |          |          |      |       |        |       |      |
|------------|-------|-------|----------|----------|------|-------|--------|-------|------|
| 1999/10/15 | 22.82 | 22.81 | 66254    | 41174.91 | 2.98 | 95.33 | 325.95 | 314.9 | 5.34 |
| 1999/10/18 | 22.53 | 22.44 | 66254    | 41174.91 | 2.92 | 95.36 | 323.99 | 310.2 | 5.24 |
| 1999/10/19 | 22.22 | 22.36 | 66254    | 41174.91 | 3.01 | 95.17 | 324.89 | 308   | 5.22 |
| 1999/10/20 | 22.2  | 22.21 | 66254    | 41174.91 | 2.98 | 95.65 | 324.36 | 305.8 | 5.21 |
| 1999/10/21 | 22.61 | 22.74 | 66254    | 41174.91 | 3.06 | 94.93 | 325.64 | 304   | 5.23 |
| 1999/10/22 | 23.45 | 23.48 | 66254    | 41174.91 | 3.07 | 96.02 | 324.21 | 301.8 | 5.25 |
| 1999/10/25 | 23.35 | 23.22 | 66254    | 41174.91 | 3.02 | 95.68 | 328.01 | 299   | 5.26 |
| 1999/10/26 | 23.19 | 23.17 | 66254    | 41174.91 | 3.01 | 96.29 | 327.78 | 288.9 | 5.21 |
| 1999/10/27 | 22.92 | 22.71 | 66254    | 41174.91 | 3.09 | 96.81 | 328.09 | 292.7 | 5.21 |
| 1999/10/28 | 21.68 | 21.59 | 66254    | 41174.91 | 2.97 | 97.12 | 325.95 | 300.4 | 5.28 |
| 1999/10/29 | 21.75 | 21.79 | 66254    | 41174.91 | 2.96 | 96.8  | 327.7  | 300.3 | 5.18 |
| 1999/11/1  | 22.51 | 22.44 | 66236    | 42190.71 | 2.91 | 97.04 | 323.03 | 291.5 | 5.22 |
| 1999/11/2  | 22.39 | 22.49 | 66236    | 42190.71 | 2.84 | 96.76 | 319.23 | 292.4 | 5.23 |
| 1999/11/3  | 22.56 | 22.59 | 66236    | 42190.71 | 2.87 | 96.87 | 320.05 | 293.3 | 5.23 |
| 1999/11/4  | 23.14 | 23.17 | 66236    | 42190.71 | 2.83 | 98.06 | 320.71 | 293.7 | 5.23 |
| 1999/11/5  | 23    | 22.93 | 66236    | 42190.71 | 2.88 | 98.29 | 325.08 | 291   | 5.09 |
| 1999/11/8  | 23.27 | 23.28 | 66236    | 42190.71 | 2.67 | 98.43 | 325.08 | 291.1 | 5.05 |
| 1999/11/9  | 24.03 | 24.21 | 66236    | 42190.71 | 2.64 | 98.14 | 326.54 | 293.1 | 5.09 |
| 1999/11/10 | 24.47 | 24.37 | 66236    | 42190.71 | 2.66 | 97.9  | 326.69 | 299.1 | 5.13 |
| 1999/11/11 | 24.33 | 24.33 | 66236    | 42190.71 | 2.52 | 98.17 | 326.08 | 294.9 | 5.1  |
| 1999/11/12 | 24.91 | 24.91 | 66236    | 42190.71 | 2.65 | 98.52 | 324.55 | 292.1 | 5.06 |
| 1999/11/15 | 25.13 | 25.31 | 66236    | 42190.71 | 2.52 | 98.24 | 326.62 | 292.5 | 5.1  |
| 1999/11/16 | 25.7  | 26.04 | 66236    | 42190.71 | 2.45 | 98.42 | 325.24 | 295.3 | 5.17 |
| 1999/11/17 | 26.6  | 26.57 | 66236    | 42190.71 | 2.46 | 98.01 | 325.01 | 295.7 | 5.11 |
| 1999/11/18 | 25.8  | 25.71 | 66236    | 42190.71 | 2.5  | 98.58 | 322.66 | 295.1 | 5.15 |
| 1999/11/19 | 26.56 | 26.61 | 66236    | 42190.71 | 2.43 | 98.41 | 324.32 | 295.7 | 5.13 |
| 1999/11/22 | 27.07 | 28.03 | 66236    | 42190.71 | 2.2  | 98.28 | 322.51 | 295.6 | 5.2  |
| 1999/11/23 | 26.44 | 26.91 | 66236    | 42190.71 | 2.19 | 98.06 | 322.81 | 298.7 | 5.29 |
| 1999/11/24 | 26.87 | 27.22 | 66236    | 42190.71 | 2.12 | 99.1  | 322.58 | 299.4 | 5.24 |
| 1999/11/29 | 25.96 | 25.84 | 66236    | 42190.71 | 2.35 | 99.28 | 326.15 | 290.6 | 5.16 |
| 1999/11/30 | 24.59 | 24.87 | 66236    | 42190.71 | 2.3  | 99.64 | 322.68 | 290.1 | 5.18 |
| 1999/12/1  | 25    | 25.01 | 65428.2  | 44335.8  | 2.39 | 99.8  | 320.79 | 288.9 | 5.16 |
| 1999/12/2  | 25.82 | 25.88 | 65428.2  | 44335.8  | 2.46 | 99.8  | 320.79 | 284.7 | 5.08 |
| 1999/12/3  | 25.81 | 25.71 | 65428.2  | 44335.8  | 2.33 | 99.75 | 320.72 | 280   | 5.08 |
| 1999/12/6  | 26.66 | 26.67 | 65428.2  | 44335.8  | 2.22 | 98.62 | 319    | 276.4 | 5.1  |
| 1999/12/7  | 26.22 | 26.36 | 65428.2  | 44335.8  | 2.27 | 98.32 | 315.19 | 283.7 | 5.14 |
| 1999/12/8  | 26.54 | 26.69 | 65428.2  | 44335.8  | 2.29 | 98.14 | 313.6  | 282.3 | 5.11 |
| 1999/12/9  | 26.15 | 26    | 65428.2  | 44335.8  | 2.29 | 98.18 | 313.32 | 278.4 | 5.1  |
| 1999/12/10 | 25.23 | 25.21 | 65428.2  | 44335.8  | 2.45 | 98.49 | 314.54 | 278.9 | 5.11 |
| 1999/12/13 | 25.38 | 25.37 | 65428.2  | 44335.8  | 2.51 | 98.37 | 314.54 | 280.1 | 5.11 |
| 1999/12/14 | 25.73 | 25.87 | 65428.2  | 44335.8  | 2.59 | 99.12 | 314.47 | 280   | 5.18 |
| 1999/12/15 | 26.36 | 26.28 | 65428.2  | 44335.8  | 2.49 | 99.49 | 317.6  | 282.6 | 5.17 |
| 1999/12/16 | 26.83 | 26.74 | 65428.2  | 44335.8  | 2.64 | 99.26 | 318.71 | 281.8 | 5.2  |
| 1999/12/17 | 26.74 | 26.76 | 65428.2  | 44335.8  | 2.66 | 99.54 | 317.67 | 283.4 | 5.22 |
| 1999/12/20 | 26.54 | 26.55 | 65428.2  | 44335.8  | 2.63 | 99.49 | 319.3  | 283.9 | 5.19 |
| 1999/12/21 | 26.26 | 26.34 | 65428.2  | 44335.8  | 2.52 | 99.12 | 318.48 | 286.9 | 5.15 |
| 1999/12/22 | 25.5  | 25.51 | 65428.2  | 44335.8  | 2.44 | 99.39 | 318.04 | 286.7 | 5.21 |
| 1999/12/23 | 25.87 | 25.86 | 65428.2  | 44335.8  | 2.4  | 98.79 | 318.93 | 286.7 | 5.19 |
| 1999/12/27 | 26.33 | 26.36 | 65428.2  | 44335.8  | 2.27 | 98.78 | 314.54 | 288   | 5.2  |
| 1999/12/28 | 26.82 | 26.81 | 65428.2  | 44335.8  | 2.34 | 98.89 | 314.25 | 290   | 5.18 |
| 1999/12/29 | 26.47 | 26.41 | 65428.2  | 44335.8  | 2.39 | 98.76 | 314.18 | 290   | 5.18 |
| 1999/12/30 | 25.6  | 25.76 | 65428.2  | 44335.8  | 2.33 | 98.94 | 314.18 | 289.6 | 5.41 |
| 2000/1/4   | 25.55 | 25.56 | 66449.89 | 40882.95 | 2.18 | 96.32 | 304.06 | 283.7 | 5.34 |
| 2000/1/5   | 24.91 | 24.65 | 66449.89 | 40882.95 | 2.17 | 96.02 | 300.14 | 282.1 | 5.17 |

|           |       |       |          |          |      |       |        |       |      |
|-----------|-------|-------|----------|----------|------|-------|--------|-------|------|
| 2000/1/6  | 24.78 | 24.79 | 66449.89 | 40882.95 | 2.2  | 95.75 | 296.25 | 282.4 | 5.13 |
| 2000/1/7  | 24.22 | 24.79 | 66449.89 | 40882.95 | 2.17 | 96.33 | 296.25 | 282.9 | 5.15 |
| 2000/1/10 | 24.67 | 24.71 | 66449.89 | 40882.95 | 2.22 | 96.36 | 292.53 | 282.7 | 5.15 |
| 2000/1/11 | 25.77 | 25.69 | 66449.89 | 40882.95 | 2.26 | 95.77 | 284.81 | 284.4 | 5.15 |
| 2000/1/12 | 26.28 | 26.3  | 66449.89 | 40882.95 | 2.24 | 95.77 | 278.94 | 283.7 | 5.1  |
| 2000/1/13 | 26.69 | 26.63 | 66449.89 | 40882.95 | 2.25 | 95.77 | 281.42 | 285.1 | 5.12 |
| 2000/1/14 | 28.02 | 28.01 | 66449.89 | 40882.95 | 2.32 | 96.32 | 282.08 | 284.9 | 5.11 |
| 2000/1/18 | 28.85 | 28.98 | 66449.89 | 40882.95 | 2.38 | 96.24 | 284.5  | 289.6 | 5.13 |
| 2000/1/19 | 29.54 | 29.11 | 66449.89 | 40882.95 | 2.42 | 95.92 | 284.01 | 290.3 | 5.14 |
| 2000/1/20 | 29.66 | 29.67 | 66449.89 | 40882.95 | 2.56 | 95.34 | 283.1  | 289.3 | 5.22 |
| 2000/1/21 | 28.2  | 29.71 | 66449.89 | 40882.95 | 2.49 | 95.56 | 281.96 | 289.7 | 5.22 |
| 2000/1/24 | 27.83 | 29.25 | 66449.89 | 40882.95 | 2.53 | 95.61 | 282.56 | 288.1 | 5.26 |
| 2000/1/25 | 28.28 | 30.28 | 66449.89 | 40882.95 | 2.62 | 95.77 | 282.08 | 286.6 | 5.28 |
| 2000/1/26 | 27.84 | 27.66 | 66449.89 | 40882.95 | 2.52 | 96.28 | 282.98 | 286.5 | 5.25 |
| 2000/1/27 | 27.32 | 27.22 | 66449.89 | 40882.95 | 2.61 | 96.24 | 283.83 | 287.1 | 5.38 |
| 2000/1/28 | 27.22 | 27.27 | 66449.89 | 40882.95 | 2.53 | 97.22 | 284.07 | 283   | 5.33 |
| 2000/1/31 | 27.64 | 27.65 | 66449.89 | 40882.95 | 2.66 | 97.59 | 284.95 | 283.2 | 5.32 |
| 2000/2/1  | 28.22 | 28.28 | 67065.69 | 43732.07 | 2.7  | 97.51 | 285.19 | 282.5 | 5.25 |
| 2000/2/2  | 27.55 | 27.52 | 67065.69 | 43732.07 | 2.76 | 98    | 285.38 | 284.9 | 5.24 |
| 2000/2/3  | 28.03 | 28.26 | 67065.69 | 43732.07 | 2.66 | 98.65 | 285.26 | 287.2 | 5.29 |
| 2000/2/4  | 28.82 | 28.67 | 67065.69 | 43732.07 | 2.74 | 98.92 | 286.31 | 310.4 | 5.57 |
| 2000/2/7  | 28.45 | 28.4  | 67065.69 | 43732.07 | 2.56 | 98.66 | 288    | 301.9 | 5.29 |
| 2000/2/8  | 28.02 | 28.05 | 67065.69 | 43732.07 | 2.5  | 97.77 | 286.56 | 299.2 | 5.34 |
| 2000/2/9  | 28.77 | 28.71 | 67065.69 | 43732.07 | 2.54 | 97.54 | 286    | 306.1 | 5.43 |
| 2000/2/10 | 29.43 | 29.49 | 67065.69 | 43732.07 | 2.59 | 97.89 | 284.95 | 316.2 | 5.43 |
| 2000/2/11 | 29.44 | 29.51 | 67065.69 | 43732.07 | 2.57 | 98.83 | 284.82 | 311.1 | 5.35 |
| 2000/2/14 | 30.25 | 30.3  | 67065.69 | 43732.07 | 2.54 | 99.2  | 287.18 | 308.5 | 5.27 |
| 2000/2/15 | 30.06 | 30.17 | 67065.69 | 43732.07 | 2.62 | 98.64 | 289.07 | 301.7 | 5.26 |
| 2000/2/16 | 30.05 | 30.01 | 67065.69 | 43732.07 | 2.56 | 98    | 287.62 | 302.5 | 5.31 |
| 2000/2/17 | 29.46 | 29.37 | 67065.69 | 43732.07 | 2.67 | 98.03 | 285.13 | 301.4 | 5.27 |
| 2000/2/18 | 29.51 | 29.51 | 67065.69 | 43732.07 | 2.63 | 98.54 | 285.38 | 305.2 | 5.28 |
| 2000/2/22 | 29.62 | 29.63 | 67065.69 | 43732.07 | 2.52 | 97.43 | 284.46 | 305.6 | 5.29 |
| 2000/2/23 | 29.39 | 30.19 | 67065.69 | 43732.07 | 2.53 | 98.24 | 283.54 | 300.4 | 5.26 |
| 2000/2/24 | 29.97 | 30.23 | 67065.69 | 43732.07 | 2.55 | 98.38 | 285.44 | 299.1 | 5.17 |
| 2000/2/25 | 30.35 | 30.34 | 67065.69 | 43732.07 | 2.6  | 98.85 | 287.37 | 293   | 5.04 |
| 2000/2/28 | 30.13 | 30.11 | 67065.69 | 43732.07 | 2.69 | 98.8  | 288.88 | 294.2 | 5.05 |
| 2000/2/29 | 30.43 | 30.57 | 67065.69 | 43732.07 | 2.76 | 99.45 | 286.88 | 294.2 | 5.05 |
| 2000/3/1  | 31.77 | 31.71 | 67098.94 | 43099.92 | 2.82 | 98.42 | 289.79 | 293.3 | 5.07 |
| 2000/3/2  | 31.69 | 31.51 | 67098.94 | 43099.92 | 2.78 | 99.16 | 289.41 | 289.7 | 5.01 |
| 2000/3/3  | 31.51 | 31.46 | 67098.94 | 43099.92 | 2.83 | 98.88 | 290.69 | 290.3 | 5.1  |
| 2000/3/6  | 32.18 | 32.19 | 67098.94 | 43099.92 | 2.85 | 99.39 | 290.3  | 289.4 | 5.05 |
| 2000/3/7  | 34.13 | 33.9  | 67098.94 | 43099.92 | 2.8  | 99.13 | 291.85 | 293.7 | 5.07 |
| 2000/3/8  | 31.26 | 31.22 | 67098.94 | 43099.92 | 2.71 | 98.85 | 291.85 | 290.4 | 5.08 |
| 2000/3/9  | 31.69 | 31.61 | 67098.94 | 43099.92 | 2.79 | 98.89 | 291.14 | 292.7 | 5.1  |
| 2000/3/10 | 31.76 | 31.76 | 67098.94 | 43099.92 | 2.77 | 98.98 | 290.82 | 290   | 5.06 |
| 2000/3/13 | 32.02 | 32.11 | 67098.94 | 43099.92 | 2.86 | 99.08 | 291.85 | 291.5 | 5.06 |
| 2000/3/14 | 31.69 | 31.93 | 67098.94 | 43099.92 | 2.81 | 99.15 | 292.77 | 289.7 | 5.09 |
| 2000/3/15 | 30.72 | 30.47 | 67098.94 | 43099.92 | 2.87 | 99.42 | 292.96 | 289.6 | 5.13 |
| 2000/3/16 | 31.09 | 31.1  | 67098.94 | 43099.92 | 2.85 | 99.28 | 293.42 | 287   | 5.09 |
| 2000/3/17 | 30.91 | 30.86 | 67098.94 | 43099.92 | 2.79 | 99.48 | 293.16 | 285   | 5.09 |
| 2000/3/20 | 29.43 | 29.33 | 67098.94 | 43099.92 | 2.71 | 99.64 | 293.95 | 286.5 | 5.03 |
| 2000/3/21 | 28    | 28.01 | 67098.94 | 43099.92 | 2.75 | 99.4  | 294.67 | 290.4 | 5.12 |
| 2000/3/22 | 27.46 | 27.28 | 67098.94 | 43099.92 | 2.79 | 99.14 | 294.61 | 288.3 | 5.13 |
| 2000/3/23 | 27.31 | 27.47 | 67098.94 | 43099.92 | 2.85 | 98.51 | 293.29 | 285.4 | 5.09 |

|           |       |       |          |          |      |        |        |       |      |
|-----------|-------|-------|----------|----------|------|--------|--------|-------|------|
| 2000/3/24 | 28.02 | 27.86 | 67098.94 | 43099.92 | 2.84 | 98.16  | 291.85 | 285.1 | 5.12 |
| 2000/3/27 | 27.79 | 27.59 | 67098.94 | 43099.92 | 2.91 | 98.58  | 290.82 | 280.5 | 5.09 |
| 2000/3/28 | 27.09 | 27.1  | 67098.94 | 43099.92 | 2.96 | 98.42  | 291.72 | 279.5 | 5.08 |
| 2000/3/29 | 26.45 | 26.36 | 67098.94 | 43099.92 | 2.9  | 98     | 291.79 | 275.9 | 4.96 |
| 2000/3/30 | 26.7  | 26.67 | 67098.94 | 43099.92 | 2.87 | 97.97  | 289.34 | 276.1 | 4.98 |
| 2000/3/31 | 26.9  | 26.86 | 67098.94 | 43099.92 | 2.95 | 98.13  | 286.46 | 278.4 | 5.05 |
| 2000/4/3  | 26.43 | 26.28 | 67757.84 | 40312.73 | 2.89 | 98.28  | 285.59 | 277.6 | 5.06 |
| 2000/4/4  | 25.45 | 25.46 | 67757.84 | 40312.73 | 2.82 | 98.13  | 284.16 | 283.9 | 5.17 |
| 2000/4/5  | 25.83 | 25.76 | 67757.84 | 40312.73 | 2.89 | 99.11  | 285.15 | 281   | 5.14 |
| 2000/4/6  | 25.69 | 25.51 | 67757.84 | 40312.73 | 2.96 | 99.35  | 287.03 | 279.9 | 5.13 |
| 2000/4/7  | 25.04 | 24.97 | 67757.84 | 40312.73 | 2.97 | 99.24  | 288.36 | 279.8 | 5.12 |
| 2000/4/10 | 23.85 | 23.91 | 67757.84 | 40312.73 | 2.97 | 99.11  | 288.74 | 281.4 | 5.17 |
| 2000/4/11 | 24.14 | 24.17 | 67757.84 | 40312.73 | 2.95 | 98.99  | 288.23 | 281.2 | 5.15 |
| 2000/4/12 | 25.41 | 25.49 | 67757.84 | 40312.73 | 3.02 | 98.96  | 288.11 | 281.2 | 5.15 |
| 2000/4/13 | 25.38 | 25.29 | 67757.84 | 40312.73 | 3.09 | 98.8   | 288.17 | 281.1 | 5.18 |
| 2000/4/14 | 25.57 | 25.48 | 67757.84 | 40312.73 | 3.08 | 98.9   | 288.87 | 282.6 | 5.18 |
| 2000/4/17 | 25.89 | 26.06 | 67757.84 | 40312.73 | 3.16 | 98.99  | 287.16 | 282.1 | 5.14 |
| 2000/4/18 | 26.11 | 25.92 | 67757.84 | 40312.73 | 3.1  | 99.44  | 287.47 | 281   | 5.14 |
| 2000/4/19 | 27.35 | 27.38 | 67757.84 | 40312.73 | 3.06 | 99.35  | 289.26 | 280.5 | 5.13 |
| 2000/4/20 | 25.88 | 27.29 | 67757.84 | 40312.73 | 3.07 | 99.33  | 288.94 | 279.7 | 5    |
| 2000/4/24 | 26.04 | 27.41 | 67757.84 | 40312.73 | 3.14 | 99.35  | 290.35 | 279.4 | 4.95 |
| 2000/4/25 | 25.33 | 26.41 | 67757.84 | 40312.73 | 3.11 | 99.3   | 290.09 | 278.1 | 5.02 |
| 2000/4/26 | 24.65 | 24.69 | 67757.84 | 40312.73 | 3.09 | 99.52  | 290.61 | 275.5 | 4.95 |
| 2000/4/27 | 25.42 | 25.53 | 67757.84 | 40312.73 | 3.06 | 99.57  | 291.39 | 278.4 | 4.96 |
| 2000/4/28 | 25.74 | 25.71 | 67757.84 | 40312.73 | 3.14 | 100.95 | 292.5  | 274.7 | 4.96 |
| 2000/5/1  | 25.87 | 25.84 | 68276.19 | 40516.49 | 3.22 | 101.17 | 292.5  | 274.8 | 5.03 |
| 2000/5/2  | 26.89 | 26.86 | 68276.19 | 40516.49 | 3.22 | 100.81 | 292.5  | 277   | 5.03 |
| 2000/5/3  | 26.75 | 26.6  | 68276.19 | 40516.49 | 3.13 | 100.7  | 290.6  | 279.1 | 5.03 |
| 2000/5/4  | 26.98 | 27.08 | 68276.19 | 40516.49 | 3.11 | 101.96 | 290.6  | 281.2 | 5.12 |
| 2000/5/5  | 27.29 | 27.37 | 68276.19 | 40516.49 | 3.03 | 102.99 | 294.46 | 280.1 | 5.01 |
| 2000/5/8  | 28.09 | 28.05 | 68276.19 | 40516.49 | 3.17 | 102.64 | 294.46 | 277.6 | 5.02 |
| 2000/5/9  | 28.65 | 28.46 | 68276.19 | 40516.49 | 3.18 | 102.58 | 294.46 | 278.2 | 5.04 |
| 2000/5/10 | 28.1  | 28.1  | 68276.19 | 40516.49 | 3.32 | 103.97 | 296.43 | 278.7 | 5.04 |
| 2000/5/11 | 29.11 | 29.25 | 68276.19 | 40516.49 | 3.35 | 104.58 | 300.72 | 276.5 | 5.02 |
| 2000/5/12 | 29.62 | 29.64 | 68276.19 | 40516.49 | 3.35 | 103.75 | 302.2  | 276.9 | 5.02 |
| 2000/5/15 | 29.92 | 29.95 | 68276.19 | 40516.49 | 3.4  | 104.25 | 299.67 | 276.4 | 5.02 |
| 2000/5/16 | 29.73 | 29.76 | 68276.19 | 40516.49 | 3.45 | 104.86 | 302.42 | 276.2 | 5.11 |
| 2000/5/17 | 29.32 | 29.38 | 68276.19 | 40516.49 | 3.69 | 105.23 | 303.99 | 273.8 | 5    |
| 2000/5/18 | 30.33 | 30.28 | 68276.19 | 40516.49 | 3.71 | 106.07 | 304.2  | 273.7 | 5.02 |
| 2000/5/19 | 29.89 | 30.02 | 68276.19 | 40516.49 | 3.83 | 105.73 | 307.11 | 274.6 | 5    |
| 2000/5/22 | 28.61 | 28.62 | 68276.19 | 40516.49 | 3.75 | 105.31 | 306.45 | 276.2 | 5.02 |
| 2000/5/23 | 28.78 | 28.61 | 68276.19 | 40516.49 | 3.81 | 106.58 | 305.07 | 274.7 | 5.02 |
| 2000/5/24 | 29.93 | 29.89 | 68276.19 | 40516.49 | 4.07 | 106.45 | 309.03 | 273.8 | 4.99 |
| 2000/5/25 | 30.51 | 30.43 | 68276.19 | 40516.49 | 4.24 | 107.12 | 308.36 | 270.7 | 4.92 |
| 2000/5/26 | 30    | 29.76 | 68276.19 | 40516.49 | 4.41 | 105.57 | 309.03 | 272.2 | 4.94 |
| 2000/5/30 | 30.35 | 30.36 | 68276.19 | 40516.49 | 4.35 | 104.97 | 305    | 272.3 | 4.95 |
| 2000/5/31 | 29.01 | 29.03 | 68276.19 | 40516.49 | 4.36 | 104.93 | 297.26 | 271.7 | 4.97 |
| 2000/6/1  | 30.14 | 30.19 | 68074.39 | 41208.61 | 4.06 | 104.81 | 296.42 | 272.5 | 4.97 |
| 2000/6/2  | 30.35 | 30.34 | 68074.39 | 41208.61 | 4.04 | 103.97 | 296.63 | 281.4 | 5.05 |
| 2000/6/5  | 29.7  | 29.87 | 68074.39 | 41208.61 | 4.4  | 103.08 | 293.58 | 285.4 | 5.08 |
| 2000/6/6  | 29.75 | 29.78 | 68074.39 | 41208.61 | 4.29 | 102.28 | 292.55 | 289   | 5.11 |
| 2000/6/7  | 29.95 | 29.29 | 68074.39 | 41208.61 | 3.95 | 102.8  | 290.99 | 287.2 | 5.12 |
| 2000/6/8  | 29.78 | 29.78 | 68074.39 | 41208.61 | 4.13 | 103.66 | 292.55 | 284   | 5.1  |
| 2000/6/9  | 30.2  | 30.22 | 68074.39 | 41208.61 | 4.16 | 103.8  | 294.75 | 283.6 | 5.06 |



|           |       |       |          |          |      |        |        |       |      |
|-----------|-------|-------|----------|----------|------|--------|--------|-------|------|
| 2000/6/12 | 31.74 | 31.76 | 68074.39 | 41208.61 | 4.21 | 103.55 | 294.75 | 286.5 | 5.04 |
| 2000/6/13 | 32.56 | 32.73 | 68074.39 | 41208.61 | 4.16 | 103.79 | 292.28 | 285.5 | 5.03 |
| 2000/6/14 | 32.85 | 32.72 | 68074.39 | 41208.61 | 4.26 | 104.29 | 293.78 | 291.6 | 5.09 |
| 2000/6/15 | 32.95 | 32.7  | 68074.39 | 41208.61 | 4.46 | 103.59 | 296.35 | 289.6 | 5.08 |
| 2000/6/16 | 32.33 | 32.35 | 68074.39 | 41208.61 | 4.49 | 103.31 | 294.06 | 288.7 | 5.09 |
| 2000/6/19 | 31.69 | 31.57 | 68074.39 | 41208.61 | 4.06 | 103.48 | 293.85 | 285.6 | 5.04 |
| 2000/6/20 | 33.05 | 33.07 | 68074.39 | 41208.61 | 4.11 | 103.11 | 294.4  | 285.7 | 5.04 |
| 2000/6/21 | 31.37 | 33.64 | 68074.39 | 41208.61 | 4.38 | 104.42 | 294.2  | 285.8 | 4.97 |
| 2000/6/22 | 32.19 | 34.72 | 68074.39 | 41208.61 | 4.55 | 103.44 | 297.12 | 285.1 | 4.98 |
| 2000/6/23 | 32.25 | 34.76 | 68074.39 | 41208.61 | 4.45 | 104.01 | 295.51 | 282.7 | 4.96 |
| 2000/6/26 | 31.63 | 31.56 | 68074.39 | 41208.61 | 4.56 | 104.42 | 297.4  | 283.6 | 4.99 |
| 2000/6/27 | 32.06 | 32.01 | 68074.39 | 41208.61 | 4.69 | 104.05 | 298.32 | 285.6 | 4.96 |
| 2000/6/28 | 31.9  | 31.86 | 68074.39 | 41208.61 | 4.37 | 103.57 | 297.26 | 292.5 | 4.99 |
| 2000/6/29 | 32.72 | 32.73 | 68074.39 | 41208.61 | 4.42 | 103.15 | 296.07 | 290.7 | 5    |
| 2000/6/30 | 32.5  | 32.44 | 68074.39 | 41208.61 | 4.48 | 103.32 | 288.04 | 291.5 | 5.03 |
| 2000/7/5  | 30.67 | 30.76 | 68695.12 | 41173.8  | 4.11 | 102.89 | 289.88 | 285.3 | 4.99 |
| 2000/7/6  | 29.99 | 30.19 | 68695.12 | 41173.8  | 4.07 | 103.02 | 290.63 | 284.6 | 5    |
| 2000/7/7  | 30.28 | 30.26 | 68695.12 | 41173.8  | 4.26 | 102.65 | 290.84 | 284.6 | 4.99 |
| 2000/7/10 | 29.69 | 29.51 | 68695.12 | 41173.8  | 4.23 | 102.76 | 289.54 | 284.9 | 5.01 |
| 2000/7/11 | 29.7  | 29.61 | 68695.12 | 41173.8  | 4.26 | 102.47 | 290.15 | 283.3 | 4.96 |
| 2000/7/12 | 30.32 | 30.34 | 68695.12 | 41173.8  | 4.03 | 103.05 | 290.22 | 281.4 | 4.98 |
| 2000/7/13 | 31.47 | 31.41 | 68695.12 | 41173.8  | 4.17 | 103.4  | 292.85 | 280.9 | 4.98 |
| 2000/7/14 | 31.4  | 31.31 | 68695.12 | 41173.8  | 4.15 | 103.71 | 293.41 | 281.9 | 5    |
| 2000/7/17 | 30.83 | 30.71 | 68695.12 | 41173.8  | 4    | 104    | 294.47 | 284.2 | 5.02 |
| 2000/7/18 | 31.94 | 31.94 | 68695.12 | 41173.8  | 4.04 | 103.8  | 295.67 | 283.1 | 5.02 |
| 2000/7/19 | 31.42 | 31.1  | 68695.12 | 41173.8  | 3.88 | 103.75 | 295.89 | 279.6 | 4.98 |
| 2000/7/20 | 30.93 | 30.94 | 68695.12 | 41173.8  | 3.86 | 102.72 | 296.39 | 280.4 | 5    |
| 2000/7/21 | 28.56 | 28.56 | 68695.12 | 41173.8  | 3.83 | 102.27 | 294.26 | 280.6 | 4.93 |
| 2000/7/24 | 28.02 | 27.97 | 68695.12 | 41173.8  | 3.72 | 102.57 | 292.57 | 279.3 | 4.95 |
| 2000/7/25 | 27.95 | 27.89 | 68695.12 | 41173.8  | 3.66 | 102.37 | 292.99 | 279.3 | 4.99 |
| 2000/7/26 | 27.81 | 27.81 | 68695.12 | 41173.8  | 3.76 | 102.57 | 292.43 | 279.7 | 4.95 |
| 2000/7/27 | 28.02 | 28.21 | 68695.12 | 41173.8  | 3.82 | 102.62 | 292.57 | 278.6 | 4.97 |
| 2000/7/28 | 28.18 | 28.22 | 68695.12 | 41173.8  | 3.85 | 103.16 | 292.02 | 277.7 | 5    |
| 2000/7/31 | 27.43 | 27.5  | 68695.12 | 41173.8  | 3.77 | 103.6  | 290.57 | 276.8 | 5.04 |
| 2000/8/1  | 27.79 | 27.85 | 69526.13 | 43319.59 | 3.99 | 103.79 | 291.68 | 276.9 | 5.03 |
| 2000/8/2  | 28.26 | 28.27 | 69526.13 | 43319.59 | 4.21 | 104.13 | 292.38 | 276.5 | 5.02 |
| 2000/8/3  | 28.66 | 28.92 | 69526.13 | 43319.59 | 4.25 | 103.87 | 292.45 | 273.4 | 5.01 |
| 2000/8/4  | 29.96 | 29.94 | 69526.13 | 43319.59 | 4.3  | 103.46 | 292.73 | 272.6 | 4.94 |
| 2000/8/7  | 28.91 | 28.93 | 69526.13 | 43319.59 | 4.35 | 102.83 | 291.68 | 273.1 | 4.97 |
| 2000/8/8  | 29.12 | 29.26 | 69526.13 | 43319.59 | 4.41 | 103.29 | 290.08 | 272.8 | 4.94 |
| 2000/8/9  | 30.35 | 30.38 | 69526.13 | 43319.59 | 4.42 | 103.52 | 291.96 | 271.6 | 4.92 |
| 2000/8/10 | 31.34 | 31.09 | 69526.13 | 43319.59 | 4.47 | 103.82 | 292.45 | 272   | 4.93 |
| 2000/8/11 | 31.02 | 31.02 | 69526.13 | 43319.59 | 4.48 | 103.41 | 293.23 | 275.1 | 4.95 |
| 2000/8/14 | 31.94 | 31.92 | 69526.13 | 43319.59 | 4.32 | 103.28 | 292.52 | 274.4 | 4.91 |
| 2000/8/15 | 31.67 | 31.43 | 69526.13 | 43319.59 | 4.23 | 103.25 | 290.43 | 274.6 | 4.88 |
| 2000/8/16 | 31.8  | 31.91 | 69526.13 | 43319.59 | 4.41 | 103.63 | 291.26 | 277.3 | 4.88 |
| 2000/8/17 | 31.94 | 31.88 | 69526.13 | 43319.59 | 4.41 | 103.68 | 292.31 | 277.7 | 4.88 |
| 2000/8/18 | 31.99 | 31.97 | 69526.13 | 43319.59 | 4.44 | 104.22 | 293.3  | 276.8 | 4.86 |
| 2000/8/21 | 32.47 | 32.42 | 69526.13 | 43319.59 | 4.75 | 104.36 | 294.22 | 275.1 | 4.87 |
| 2000/8/22 | 31.22 | 31.24 | 69526.13 | 43319.59 | 4.52 | 104.75 | 294.94 | 273.5 | 4.85 |
| 2000/8/23 | 32.02 | 31.23 | 69526.13 | 43319.59 | 4.61 | 104.62 | 296.74 | 271.1 | 4.8  |
| 2000/8/24 | 31.63 | 33.41 | 69526.13 | 43319.59 | 4.54 | 104.83 | 296.16 | 272.9 | 4.86 |
| 2000/8/25 | 32.03 | 34.01 | 69526.13 | 43319.59 | 4.63 | 105.57 | 296.95 | 274.1 | 4.9  |
| 2000/8/28 | 32.87 | 32.92 | 69526.13 | 43319.59 | 4.69 | 105.68 | 298.26 | 274   | 4.94 |

|            |       |       |          |          |      |        |        |       |      |
|------------|-------|-------|----------|----------|------|--------|--------|-------|------|
| 2000/8/29  | 32.74 | 32.73 | 69526.13 | 43319.59 | 4.62 | 106.67 | 297.9  | 273.4 | 4.95 |
| 2000/8/30  | 33.32 | 33.25 | 69526.13 | 43319.59 | 4.8  | 106.49 | 302.04 | 275.4 | 4.93 |
| 2000/8/31  | 33.12 | 33.09 | 69526.13 | 43319.59 | 4.78 | 107.08 | 299.31 | 279.6 | 5    |
| 2000/9/1   | 33.38 | 33.42 | 69542.82 | 42615.7  | 4.62 | 106.64 | 301.17 | 278.3 | 5    |
| 2000/9/5   | 33.83 | 33.92 | 69542.82 | 42615.7  | 4.95 | 107.21 | 298.35 | 277.1 | 5    |
| 2000/9/6   | 34.9  | 34.97 | 69542.82 | 42615.7  | 5.07 | 108.31 | 298.57 | 275.3 | 4.98 |
| 2000/9/7   | 35.39 | 35.18 | 69542.82 | 42615.7  | 5    | 108.4  | 302.3  | 275.1 | 4.94 |
| 2000/9/8   | 33.63 | 33.62 | 69542.82 | 42615.7  | 4.88 | 109.72 | 302.68 | 274.2 | 4.92 |
| 2000/9/11  | 35.14 | 35.14 | 69542.82 | 42615.7  | 5.01 | 110.64 | 305.97 | 274   | 4.89 |
| 2000/9/12  | 34.28 | 34.25 | 69542.82 | 42615.7  | 5.01 | 110.83 | 309.89 | 273.8 | 4.91 |
| 2000/9/13  | 33.82 | 33.87 | 69542.82 | 42615.7  | 5.06 | 110.61 | 309.73 | 273.7 | 4.89 |
| 2000/9/14  | 34.07 | 34.37 | 69542.82 | 42615.7  | 5.2  | 110.82 | 309.42 | 273.2 | 4.89 |
| 2000/9/15  | 35.92 | 35.87 | 69542.82 | 42615.7  | 5.21 | 111.4  | 310.21 | 273   | 4.87 |
| 2000/9/18  | 36.88 | 36.75 | 69542.82 | 42615.7  | 5.3  | 110.85 | 311.49 | 272.1 | 4.88 |
| 2000/9/19  | 36.51 | 36.96 | 69542.82 | 42615.7  | 5.36 | 110.54 | 310.69 | 272.6 | 4.88 |
| 2000/9/20  | 37.2  | 37.22 | 69542.82 | 42615.7  | 5.32 | 110.57 | 309.26 | 269.7 | 4.83 |
| 2000/9/21  | 34    | 33.84 | 69542.82 | 42615.7  | 5.29 | 108.55 | 307.84 | 270.8 | 4.87 |
| 2000/9/22  | 32.68 | 32.66 | 69542.82 | 42615.7  | 5.13 | 106.83 | 302.91 | 272.3 | 4.91 |
| 2000/9/25  | 31.57 | 31.5  | 69542.82 | 42615.7  | 5.28 | 107.45 | 296.96 | 274.4 | 4.92 |
| 2000/9/26  | 31.5  | 31.78 | 69542.82 | 42615.7  | 5.32 | 106.55 | 299.24 | 274.2 | 4.93 |
| 2000/9/27  | 31.46 | 31.23 | 69542.82 | 42615.7  | 5.31 | 106.51 | 296.74 | 278.4 | 4.97 |
| 2000/9/28  | 30.34 | 30.26 | 69542.82 | 42615.7  | 5.12 | 106.5  | 297.91 | 275.6 | 5    |
| 2000/9/29  | 30.84 | 30.87 | 69542.82 | 42615.7  | 5.19 | 105.75 | 297.91 | 273.6 | 4.95 |
| 2000/10/2  | 32.18 | 32.05 | 69980.34 | 40893.66 | 5.35 | 105.92 | 289.62 | 273.1 | 4.96 |
| 2000/10/3  | 32.07 | 31.86 | 69980.34 | 40893.66 | 5.35 | 106.79 | 290.97 | 271.6 | 4.96 |
| 2000/10/4  | 31.43 | 30.91 | 69980.34 | 40893.66 | 5.29 | 106.61 | 292.4  | 270.3 | 4.92 |
| 2000/10/5  | 30.53 | 30.66 | 69980.34 | 40893.66 | 5.15 | 107.57 | 291.47 | 270.6 | 4.94 |
| 2000/10/6  | 30.86 | 30.86 | 69980.34 | 40893.66 | 5.01 | 107.51 | 293.93 | 269.3 | 4.93 |
| 2000/10/9  | 31.86 | 31.98 | 69980.34 | 40893.66 | 5.15 | 107.42 | 293.63 | 270.1 | 4.93 |
| 2000/10/10 | 33.18 | 33.29 | 69980.34 | 40893.66 | 5.13 | 107.08 | 292.76 | 272.4 | 4.96 |
| 2000/10/11 | 33.25 | 33.2  | 69980.34 | 40893.66 | 5.51 | 106.47 | 291.83 | 270.5 | 4.92 |
| 2000/10/12 | 36.06 | 36.06 | 69980.34 | 40893.66 | 5.63 | 105.83 | 290.4  | 276.4 | 4.97 |
| 2000/10/13 | 34.99 | 34.96 | 69980.34 | 40893.66 | 5.54 | 107.16 | 288.7  | 272.4 | 4.93 |
| 2000/10/16 | 32.92 | 33.18 | 69980.34 | 40893.66 | 5.36 | 107.5  | 293.27 | 271.5 | 4.92 |
| 2000/10/17 | 32.99 | 33.36 | 69980.34 | 40893.66 | 5.44 | 107.33 | 294.88 | 271.1 | 4.89 |
| 2000/10/18 | 33.48 | 33.51 | 69980.34 | 40893.66 | 5.23 | 107.83 | 293.27 | 270.3 | 4.89 |
| 2000/10/19 | 32.91 | 33.06 | 69980.34 | 40893.66 | 4.95 | 107.71 | 293.71 | 270.1 | 4.87 |
| 2000/10/20 | 33.75 | 34.31 | 69980.34 | 40893.66 | 4.94 | 107.32 | 292.69 | 271.2 | 4.87 |
| 2000/10/23 | 33.76 | 34.9  | 69980.34 | 40893.66 | 5.07 | 107.11 | 291.68 | 270.1 | 4.82 |
| 2000/10/24 | 33.37 | 34.53 | 69980.34 | 40893.66 | 4.82 | 107.27 | 291.83 | 270.1 | 4.83 |
| 2000/10/25 | 32.96 | 33.62 | 69980.34 | 40893.66 | 4.66 | 108.46 | 293.2  | 266.2 | 4.8  |
| 2000/10/26 | 33.71 | 33.75 | 69980.34 | 40893.66 | 4.66 | 108.52 | 295.91 | 264.9 | 4.77 |
| 2000/10/27 | 32.74 | 32.78 | 69980.34 | 40893.66 | 4.54 | 107.02 | 296.43 | 264.4 | 4.78 |
| 2000/10/30 | 32.81 | 32.86 | 69980.34 | 40893.66 | 4.49 | 107.11 | 292.91 | 265.8 | 4.77 |
| 2000/10/31 | 32.7  | 32.7  | 69980.34 | 40893.66 | 4.49 | 107.34 | 290.43 | 266.4 | 4.78 |
| 2000/11/1  | 33.25 | 33.14 | 70536.25 | 42373.92 | 4.69 | 107.45 | 289.28 | 265.4 | 4.8  |
| 2000/11/2  | 32.54 | 32.59 | 70536.25 | 42373.92 | 4.76 | 107.69 | 289.92 | 265.9 | 4.74 |
| 2000/11/3  | 32.71 | 32.62 | 70536.25 | 42373.92 | 4.93 | 107.37 | 290.93 | 266.1 | 4.77 |
| 2000/11/6  | 32.86 | 33.02 | 70536.25 | 42373.92 | 4.85 | 108.97 | 290.93 | 266   | 4.79 |
| 2000/11/7  | 33.4  | 33.44 | 70536.25 | 42373.92 | 5.08 | 108.54 | 290.93 | 265.4 | 4.75 |
| 2000/11/8  | 33.24 | 32.92 | 70536.25 | 42373.92 | 5.34 | 109.47 | 294.67 | 266.1 | 4.76 |
| 2000/11/9  | 33.92 | 33.87 | 70536.25 | 42373.92 | 5.45 | 108.76 | 297.52 | 266.9 | 4.77 |
| 2000/11/10 | 34.02 | 34.05 | 70536.25 | 42373.92 | 5.46 | 109.02 | 293.93 | 265.5 | 4.72 |
| 2000/11/13 | 34.47 | 34.3  | 70536.25 | 42373.92 | 5.7  | 108.17 | 294.45 | 265.3 | 4.69 |

|            |       |       |          |          |      |        |        |       |      |
|------------|-------|-------|----------|----------|------|--------|--------|-------|------|
| 2000/11/14 | 34.87 | 34.72 | 70536.25 | 42373.92 | 6.02 | 108.91 | 292.9  | 265.4 | 4.7  |
| 2000/11/15 | 35.58 | 35.54 | 70536.25 | 42373.92 | 6.27 | 109.16 | 295.19 | 265.6 | 4.69 |
| 2000/11/16 | 35.12 | 34.84 | 70536.25 | 42373.92 | 5.8  | 109.36 | 295.27 | 266.3 | 4.67 |
| 2000/11/17 | 35.45 | 35.62 | 70536.25 | 42373.92 | 6.1  | 109.46 | 295.05 | 266.2 | 4.66 |
| 2000/11/20 | 35.22 | 35.98 | 70536.25 | 42373.92 | 6.25 | 109.4  | 294.75 | 266.8 | 4.66 |
| 2000/11/21 | 35.16 | 35.54 | 70536.25 | 42373.92 | 6.41 | 109.81 | 294.97 | 266.1 | 4.63 |
| 2000/11/22 | 35.4  | 36.06 | 70536.25 | 42373.92 | 6.58 | 110.66 | 295.79 | 266.7 | 4.63 |
| 2000/11/27 | 35.38 | 36.24 | 70536.25 | 42373.92 | 6.37 | 109.73 | 298.89 | 270.3 | 4.7  |
| 2000/11/28 | 34.22 | 34.02 | 70536.25 | 42373.92 | 6.02 | 109.84 | 295.64 | 269.8 | 4.7  |
| 2000/11/29 | 34.63 | 34.58 | 70536.25 | 42373.92 | 6.18 | 109.39 | 295.94 | 266.4 | 4.62 |
| 2000/11/30 | 33.82 | 33.61 | 70536.25 | 42373.92 | 6.59 | 109.27 | 289.99 | 270.1 | 4.67 |
| 2000/12/1  | 32.02 | 32.06 | 69280.21 | 44185.5  | 6.02 | 108.35 | 288.46 | 268.7 | 4.64 |
| 2000/12/4  | 31.22 | 31.28 | 69280.21 | 44185.5  | 7.43 | 107.19 | 285.88 | 270.7 | 4.71 |
| 2000/12/5  | 29.53 | 29.25 | 69280.21 | 44185.5  | 7.38 | 108.64 | 284.12 | 270.4 | 4.7  |
| 2000/12/6  | 29.85 | 30.24 | 69280.21 | 44185.5  | 8.49 | 108.05 | 287.24 | 274.3 | 4.75 |
| 2000/12/7  | 29.35 | 29.36 | 69280.21 | 44185.5  | 8.37 | 107.95 | 284.89 | 273.2 | 4.72 |
| 2000/12/8  | 28.44 | 28.31 | 69280.21 | 44185.5  | 8.58 | 107.78 | 284.96 | 272.2 | 4.65 |
| 2000/12/11 | 29.5  | 29.75 | 69280.21 | 44185.5  | 9.41 | 106.93 | 284.96 | 270.2 | 4.66 |
| 2000/12/12 | 29.68 | 29.81 | 69280.21 | 44185.5  | 8.15 | 107.51 | 284.96 | 270.3 | 4.66 |
| 2000/12/13 | 28.74 | 28.75 | 69280.21 | 44185.5  | 7.54 | 107.15 | 283.56 | 268.6 | 4.62 |
| 2000/12/14 | 27.99 | 28.06 | 69280.21 | 44185.5  | 7.41 | 105.89 | 282.09 | 269   | 4.6  |
| 2000/12/15 | 28.87 | 28.86 | 69280.21 | 44185.5  | 8.4  | 105.65 | 278.81 | 270.4 | 4.56 |
| 2000/12/18 | 29.76 | 29.52 | 69280.21 | 44185.5  | 8.53 | 105.77 | 278.54 | 269.7 | 4.58 |
| 2000/12/19 | 29.33 | 29.34 | 69280.21 | 44185.5  | 9.1  | 106.21 | 279.01 | 269.7 | 4.59 |
| 2000/12/20 | 25.77 | 25.83 | 69280.21 | 44185.5  | 9.33 | 105.47 | 279.9  | 272.5 | 4.6  |
| 2000/12/21 | 25.98 | 26.06 | 69280.21 | 44185.5  | 9.83 | 105.87 | 279.69 | 273.7 | 4.6  |
| 2000/12/22 | 26.18 | 26.16 | 69280.21 | 44185.5  | 9.58 | 105.13 | 278.95 | 273.7 | 4.61 |
| 2000/12/26 | 26.64 | 27    | 69280.21 | 44185.5  | 9.81 | 104.97 | 277.33 | 274.1 | 4.62 |
| 2000/12/27 | 26.47 | 26.55 | 69280.21 | 44185.5  | 9.98 | 104.24 | 274.81 | 275.2 | 4.58 |
| 2000/12/28 | 25.85 | 25.82 | 69280.21 | 44185.5  | 9.26 | 104.39 | 273.12 | 273.7 | 4.59 |
| 2000/12/29 | 26.8  | 26.72 | 69280.21 | 44185.5  | 9.78 | 104.29 | 273.7  | 273.6 | 4.59 |
| 2001/1/2   | 27.21 | 27.29 | 69197.45 | 42809.08 | 8.36 | 102.42 | 273.7  | 270   | 4.55 |
| 2001/1/3   | 28    | 27.93 | 69197.45 | 42809.08 | 8.19 | 102.86 | 262.29 | 269.3 | 4.49 |
| 2001/1/4   | 28.14 | 27.95 | 69197.45 | 42809.08 | 8.97 | 102.36 | 261.37 | 268.4 | 4.53 |
| 2001/1/5   | 27.95 | 28.02 | 69197.45 | 42809.08 | 9.26 | 102.19 | 259.41 | 269   | 4.56 |
| 2001/1/8   | 27.32 | 27.44 | 69197.45 | 42809.08 | 9.69 | 102.54 | 259.41 | 269   | 4.55 |
| 2001/1/9   | 27.64 | 27.72 | 69197.45 | 42809.08 | 9.82 | 102.95 | 261.31 | 268.5 | 4.55 |
| 2001/1/10  | 29.48 | 29.42 | 69197.45 | 42809.08 | 9.13 | 103.02 | 262.67 | 265.6 | 4.54 |
| 2001/1/11  | 29.41 | 29.42 | 69197.45 | 42809.08 | 8.71 | 102.7  | 262.67 | 264.8 | 4.56 |
| 2001/1/12  | 30.05 | 30.07 | 69197.45 | 42809.08 | 8.47 | 103.77 | 261.18 | 264.6 | 4.62 |
| 2001/1/16  | 30.29 | 30.19 | 69197.45 | 42809.08 | 8.1  | 104.47 | 265.18 | 263.9 | 4.68 |
| 2001/1/17  | 29.6  | 29.77 | 69197.45 | 42809.08 | 6.91 | 104.18 | 265.56 | 263.8 | 4.71 |
| 2001/1/18  | 30.45 | 30.42 | 69197.45 | 42809.08 | 7.14 | 104.22 | 265.24 | 264.8 | 4.79 |
| 2001/1/19  | 32.19 | 32.12 | 69197.45 | 42809.08 | 7.46 | 104.87 | 265.62 | 264.9 | 4.75 |
| 2001/1/22  | 32.19 | 32.21 | 69197.45 | 42809.08 | 7.46 | 104.84 | 266.83 | 267   | 4.77 |
| 2001/1/23  | 29.57 | 31.66 | 69197.45 | 42809.08 | 6.95 | 104.44 | 266.26 | 266.7 | 4.78 |
| 2001/1/24  | 29.05 | 31.46 | 69197.45 | 42809.08 | 7.12 | 105.25 | 266.71 | 264.6 | 4.77 |
| 2001/1/25  | 29.36 | 31.61 | 69197.45 | 42809.08 | 7.27 | 105.2  | 268.64 | 264.8 | 4.79 |
| 2001/1/26  | 29.77 | 29.79 | 69197.45 | 42809.08 | 7.26 | 105.21 | 268.19 | 262.9 | 4.81 |
| 2001/1/29  | 29.06 | 29.07 | 69197.45 | 42809.08 | 6.29 | 105.23 | 267.86 | 262.8 | 4.8  |
| 2001/1/30  | 29.06 | 29.12 | 69197.45 | 42809.08 | 6.1  | 104.98 | 268.25 | 265.5 | 4.82 |
| 2001/1/31  | 28.66 | 28.62 | 69197.45 | 42809.08 | 5.71 | 104.97 | 261.94 | 265.6 | 4.82 |
| 2001/2/1   | 29.82 | 29.88 | 68718.72 | 43333.45 | 6.29 | 103.56 | 260.12 | 268.5 | 4.81 |
| 2001/2/2   | 31.19 | 31.27 | 68718.72 | 43333.45 | 6.74 | 104.49 | 258.2  | 267.1 | 4.79 |

|           |       |       |          |          |      |        |        |       |      |
|-----------|-------|-------|----------|----------|------|--------|--------|-------|------|
| 2001/2/5  | 30.55 | 30.55 | 68718.72 | 43333.45 | 5.71 | 103.79 | 259.75 | 265.2 | 4.7  |
| 2001/2/6  | 30.35 | 30.27 | 68718.72 | 43333.45 | 5.76 | 105.03 | 259.62 | 263.3 | 4.67 |
| 2001/2/7  | 31.27 | 31.27 | 68718.72 | 43333.45 | 6.24 | 105.21 | 261.87 | 262.8 | 4.63 |
| 2001/2/8  | 31.59 | 31.57 | 68718.72 | 43333.45 | 6.16 | 106.07 | 262.32 | 260.1 | 4.57 |
| 2001/2/9  | 31.03 | 30.93 | 68718.72 | 43333.45 | 6.21 | 105.84 | 263.08 | 259.9 | 4.56 |
| 2001/2/12 | 30.51 | 30.52 | 68718.72 | 43333.45 | 5.82 | 105.4  | 261.12 | 260.7 | 4.56 |
| 2001/2/13 | 30.36 | 30.12 | 68718.72 | 43333.45 | 6.02 | 105.44 | 260.87 | 260.3 | 4.55 |
| 2001/2/14 | 29.71 | 29.55 | 68718.72 | 43333.45 | 5.52 | 105.09 | 260.74 | 259.4 | 4.52 |
| 2001/2/15 | 28.8  | 28.96 | 68718.72 | 43333.45 | 5.59 | 105.71 | 259.87 | 255.1 | 4.52 |
| 2001/2/16 | 29.16 | 29.22 | 68718.72 | 43333.45 | 5.57 | 105.76 | 260.93 | 258.2 | 4.49 |
| 2001/2/20 | 28.58 | 28.6  | 68718.72 | 43333.45 | 5.28 | 105.9  | 261.75 | 256.1 | 4.42 |
| 2001/2/21 | 28.53 | 28.64 | 68718.72 | 43333.45 | 5.15 | 106.2  | 262.44 | 258.2 | 4.41 |
| 2001/2/22 | 28.82 | 28.52 | 68718.72 | 43333.45 | 5.14 | 105.97 | 263.27 | 258.5 | 4.42 |
| 2001/2/23 | 29.04 | 28.83 | 68718.72 | 43333.45 | 5.13 | 105.29 | 262.06 | 260.9 | 4.43 |
| 2001/2/26 | 28.42 | 28.27 | 68718.72 | 43333.45 | 5    | 106.03 | 259.56 | 265.8 | 4.45 |
| 2001/2/27 | 28.13 | 28.26 | 68718.72 | 43333.45 | 5.28 | 106.09 | 261.56 | 268.4 | 4.41 |
| 2001/2/28 | 27.39 | 27.35 | 68718.72 | 43333.45 | 5.24 | 105.92 | 259.59 | 267.8 | 4.47 |
| 2001/3/1  | 27.62 | 27.78 | 69380.85 | 42421.81 | 5    | 105.3  | 258.9  | 266.2 | 4.4  |
| 2001/3/2  | 27.84 | 27.89 | 69380.85 | 42421.81 | 5.27 | 104.35 | 256.98 | 263.1 | 4.42 |
| 2001/3/5  | 28.6  | 28.61 | 69380.85 | 42421.81 | 5.34 | 104.56 | 254.41 | 263.5 | 4.42 |
| 2001/3/6  | 28.32 | 28.4  | 69380.85 | 42421.81 | 5.32 | 104.58 | 255.2  | 260.9 | 4.41 |
| 2001/3/7  | 29    | 28.95 | 69380.85 | 42421.81 | 5.35 | 105.09 | 254.41 | 262.4 | 4.43 |
| 2001/3/8  | 28.39 | 28.31 | 69380.85 | 42421.81 | 5.29 | 104.47 | 254.41 | 266.1 | 4.48 |
| 2001/3/9  | 28.01 | 27.97 | 69380.85 | 42421.81 | 5.07 | 104.55 | 254.41 | 271.5 | 4.49 |
| 2001/3/12 | 28    | 27.91 | 69380.85 | 42421.81 | 5.16 | 104.85 | 254.78 | 272.3 | 4.41 |
| 2001/3/13 | 27.59 | 27.45 | 69380.85 | 42421.81 | 5.01 | 105.92 | 255.93 | 267.5 | 4.42 |
| 2001/3/14 | 26.41 | 26.49 | 69380.85 | 42421.81 | 4.91 | 106.16 | 258.09 | 262.9 | 4.43 |
| 2001/3/15 | 26.55 | 26.56 | 69380.85 | 42421.81 | 4.93 | 106.63 | 258.78 | 260.3 | 4.33 |
| 2001/3/16 | 26.74 | 26.68 | 69380.85 | 42421.81 | 5.04 | 107.38 | 260.1  | 258.4 | 4.29 |
| 2001/3/19 | 26.15 | 26.17 | 69380.85 | 42421.81 | 5.06 | 107.8  | 261.88 | 260.1 | 4.3  |
| 2001/3/20 | 25.96 | 25.99 | 69380.85 | 42421.81 | 5.29 | 107.06 | 262.01 | 260.8 | 4.33 |
| 2001/3/21 | 26.8  | 26.43 | 69380.85 | 42421.81 | 5.04 | 107.24 | 260.35 | 262.2 | 4.32 |
| 2001/3/22 | 26.54 | 26.19 | 69380.85 | 42421.81 | 5.21 | 108.04 | 261.3  | 261.4 | 4.33 |
| 2001/3/23 | 27.3  | 27.31 | 69380.85 | 42421.81 | 5.27 | 107.57 | 261.49 | 261.7 | 4.34 |
| 2001/3/26 | 27.48 | 27.4  | 69380.85 | 42421.81 | 5.32 | 106.96 | 260.73 | 262.1 | 4.36 |
| 2001/3/27 | 27.75 | 27.62 | 69380.85 | 42421.81 | 5.62 | 107.12 | 259.72 | 261.1 | 4.41 |
| 2001/3/28 | 26.31 | 26.43 | 69380.85 | 42421.81 | 5.38 | 106.79 | 259.72 | 259.7 | 4.35 |
| 2001/3/29 | 26.32 | 26.47 | 69380.85 | 42421.81 | 5.27 | 107.49 | 259.22 | 258.8 | 4.34 |
| 2001/3/30 | 26.29 | 26.37 | 69380.85 | 42421.81 | 5.03 | 108.24 | 260.92 | 257.9 | 4.3  |
| 2001/4/2  | 25.59 | 25.7  | 68451.23 | 41630.48 | 5.1  | 108.47 | 259.51 | 255.6 | 4.32 |
| 2001/4/3  | 26.19 | 26.65 | 68451.23 | 41630.48 | 5.12 | 107.22 | 258.11 | 256.8 | 4.31 |
| 2001/4/4  | 27.12 | 27.16 | 68451.23 | 41630.48 | 5.18 | 107.23 | 256.18 | 258.4 | 4.34 |
| 2001/4/5  | 27.26 | 27.24 | 68451.23 | 41630.48 | 5.42 | 107.6  | 255.25 | 258.1 | 4.35 |
| 2001/4/6  | 27.06 | 27.07 | 68451.23 | 41630.48 | 5.39 | 106.91 | 256.92 | 260   | 4.34 |
| 2001/4/9  | 27.28 | 27.45 | 68451.23 | 41630.48 | 5.48 | 106.27 | 255    | 258.3 | 4.32 |
| 2001/4/10 | 28.48 | 28.47 | 68451.23 | 41630.48 | 5.56 | 107.19 | 254.21 | 257.3 | 4.33 |
| 2001/4/11 | 28.18 | 28.42 | 68451.23 | 41630.48 | 5.39 | 106.95 | 255.37 | 258.7 | 4.36 |
| 2001/4/12 | 28.25 | 28.75 | 68451.23 | 41630.48 | 5.38 | 106.77 | 255.25 | 260.1 | 4.37 |
| 2001/4/16 | 28.79 | 28.81 | 68451.23 | 41630.48 | 5.52 | 107.08 | 255.31 | 263.3 | 4.44 |
| 2001/4/17 | 28.24 | 27.89 | 68451.23 | 41630.48 | 5.25 | 107.51 | 254.57 | 261.1 | 4.37 |
| 2001/4/18 | 27.95 | 27.83 | 68451.23 | 41630.48 | 5.15 | 106.58 | 256.24 | 261.3 | 4.37 |
| 2001/4/19 | 27.82 | 27.92 | 68451.23 | 41630.48 | 5.1  | 106.21 | 256.49 | 265.3 | 4.43 |
| 2001/4/20 | 27.28 | 27    | 68451.23 | 41630.48 | 5.13 | 106.49 | 253.66 | 264.8 | 4.44 |
| 2001/4/23 | 27.61 | 26.97 | 68451.23 | 41630.48 | 5.13 | 107.21 | 254.02 | 263.7 | 4.44 |

|           |       |       |          |          |      |        |        |       |      |
|-----------|-------|-------|----------|----------|------|--------|--------|-------|------|
| 2001/4/24 | 26.86 | 25.24 | 68451.23 | 41630.48 | 5.08 | 107.13 | 254.88 | 264.1 | 4.45 |
| 2001/4/25 | 27.29 | 25.93 | 68451.23 | 41630.48 | 4.98 | 106.6  | 255.31 | 262.4 | 4.37 |
| 2001/4/26 | 28.44 | 28.47 | 68451.23 | 41630.48 | 4.89 | 106.74 | 254.64 | 264.4 | 4.38 |
| 2001/4/27 | 28.27 | 28.35 | 68451.23 | 41630.48 | 4.87 | 107.21 | 254.82 | 264.3 | 4.36 |
| 2001/4/30 | 28.46 | 28.48 | 68451.23 | 41630.48 | 4.7  | 107.42 | 254.82 | 264.4 | 4.32 |
| 2001/5/1  | 28.94 | 28.37 | 67760.76 | 40679.77 | 4.64 | 107.55 | 254.82 | 264.8 | 4.35 |
| 2001/5/2  | 27.8  | 27.89 | 67760.76 | 40679.77 | 4.48 | 107.63 | 254.82 | 265.8 | 4.36 |
| 2001/5/3  | 28.45 | 28.66 | 67760.76 | 40679.77 | 4.53 | 107.45 | 252.59 | 266.7 | 4.33 |
| 2001/5/4  | 28.36 | 28.41 | 67760.76 | 40679.77 | 4.49 | 107.21 | 252.05 | 266.5 | 4.33 |
| 2001/5/7  | 27.77 | 27.79 | 67760.76 | 40679.77 | 4.24 | 107.18 | 251.92 | 266.5 | 4.29 |
| 2001/5/8  | 27.39 | 27.35 | 67760.76 | 40679.77 | 4.28 | 108.11 | 251.86 | 265.5 | 4.3  |
| 2001/5/9  | 28.23 | 28.39 | 67760.76 | 40679.77 | 4.2  | 108.49 | 251.86 | 270.4 | 4.39 |
| 2001/5/10 | 28.52 | 28.5  | 67760.76 | 40679.77 | 4.35 | 108.37 | 254.31 | 269.5 | 4.32 |
| 2001/5/11 | 28.55 | 28.59 | 67760.76 | 40679.77 | 4.28 | 108.6  | 254.49 | 268.3 | 4.31 |
| 2001/5/14 | 28.71 | 28.83 | 67760.76 | 40679.77 | 4.39 | 108.6  | 255.18 | 268.7 | 4.33 |
| 2001/5/15 | 28.98 | 28.9  | 67760.76 | 40679.77 | 4.65 | 107.82 | 254.31 | 268.5 | 4.3  |
| 2001/5/16 | 28.86 | 28.77 | 67760.76 | 40679.77 | 4.3  | 107.81 | 254.06 | 272.4 | 4.44 |
| 2001/5/17 | 28.91 | 29.02 | 67760.76 | 40679.77 | 4.25 | 107.79 | 252.41 | 274   | 4.47 |
| 2001/5/18 | 29.91 | 29.9  | 67760.76 | 40679.77 | 4.29 | 107.17 | 251.86 | 287.8 | 4.55 |
| 2001/5/21 | 29.98 | 29.96 | 67760.76 | 40679.77 | 4.11 | 107.17 | 249.88 | 285.8 | 4.53 |
| 2001/5/22 | 29.74 | 29.75 | 67760.76 | 40679.77 | 4.12 | 108.09 | 250.6  | 285.5 | 4.54 |
| 2001/5/23 | 29.58 | 28.85 | 67760.76 | 40679.77 | 4.11 | 109.49 | 252.59 | 284   | 4.56 |
| 2001/5/24 | 28.41 | 27.97 | 67760.76 | 40679.77 | 4.05 | 109.54 | 254.37 | 279.4 | 4.6  |
| 2001/5/25 | 28.38 | 28.08 | 67760.76 | 40679.77 | 3.97 | 108.49 | 255.42 | 278.2 | 4.56 |
| 2001/5/29 | 28.66 | 28.76 | 67760.76 | 40679.77 | 3.74 | 108.77 | 253.75 | 273.9 | 4.52 |
| 2001/5/30 | 28.55 | 28.71 | 67760.76 | 40679.77 | 3.98 | 108.14 | 253.69 | 265.7 | 4.45 |
| 2001/5/31 | 28.37 | 28.39 | 67760.76 | 40679.77 | 3.91 | 108.76 | 249.02 | 265.3 | 4.41 |
| 2001/6/1  | 27.93 | 27.88 | 66206.98 | 41303.16 | 3.74 | 108.67 | 249.5  | 266.4 | 4.42 |
| 2001/6/4  | 28.13 | 28.14 | 66206.98 | 41303.16 | 4.13 | 109    | 249.32 | 264.9 | 4.34 |
| 2001/6/5  | 28.24 | 27.84 | 66206.98 | 41303.16 | 3.89 | 109.06 | 250.96 | 265.7 | 4.34 |
| 2001/6/6  | 27.72 | 27.56 | 66206.98 | 41303.16 | 3.8  | 110.74 | 250.96 | 265.7 | 4.34 |
| 2001/6/7  | 27.75 | 27.91 | 66206.98 | 41303.16 | 3.79 | 110.91 | 254.55 | 266   | 4.34 |
| 2001/6/8  | 28.33 | 28.43 | 66206.98 | 41303.16 | 3.92 | 111.64 | 254.8  | 273.4 | 4.37 |
| 2001/6/11 | 29.04 | 28.94 | 66206.98 | 41303.16 | 4.18 | 112.15 | 254.8  | 267.9 | 4.34 |
| 2001/6/12 | 29.18 | 29.13 | 66206.98 | 41303.16 | 4.3  | 112.28 | 254.8  | 271.5 | 4.38 |
| 2001/6/13 | 28.84 | 28.81 | 66206.98 | 41303.16 | 4.11 | 110.85 | 258.3  | 272   | 4.42 |
| 2001/6/14 | 29.04 | 29.12 | 66206.98 | 41303.16 | 4.04 | 109.99 | 255.36 | 275.3 | 4.47 |
| 2001/6/15 | 28.51 | 28.52 | 66206.98 | 41303.16 | 3.98 | 109.88 | 253.55 | 271.2 | 4.4  |
| 2001/6/18 | 27.55 | 27.55 | 66206.98 | 41303.16 | 3.94 | 109.67 | 253.11 | 272.4 | 4.42 |
| 2001/6/19 | 27.48 | 27.49 | 66206.98 | 41303.16 | 3.98 | 110    | 253.17 | 273.4 | 4.4  |
| 2001/6/20 | 26.5  | 26.52 | 66206.98 | 41303.16 | 3.73 | 110.45 | 253.67 | 272.4 | 4.35 |
| 2001/6/21 | 26.56 | 26.85 | 66206.98 | 41303.16 | 3.75 | 108.89 | 254.17 | 272.6 | 4.32 |
| 2001/6/22 | 26.83 | 27.02 | 66206.98 | 41303.16 | 3.74 | 109.24 | 250.59 | 272.3 | 4.3  |
| 2001/6/25 | 27.25 | 27.11 | 66206.98 | 41303.16 | 3.45 | 109.04 | 250.71 | 273.7 | 4.3  |
| 2001/6/26 | 26.98 | 26.97 | 66206.98 | 41303.16 | 3.4  | 108.9  | 251.26 | 276.2 | 4.35 |
| 2001/6/27 | 25.61 | 25.67 | 66206.98 | 41303.16 | 3.18 | 108.77 | 250.35 | 272.1 | 4.31 |
| 2001/6/28 | 25.56 | 25.75 | 66206.98 | 41303.16 | 3.28 | 109.49 | 250.29 | 270   | 4.29 |
| 2001/6/29 | 26.25 | 26.37 | 66206.98 | 41303.16 | 3.1  | 108.89 | 252.25 | 271.3 | 4.29 |
| 2001/7/2  | 25.95 | 26.02 | 68146.13 | 41659.19 | 3.12 | 108.35 | 247.49 | 270.1 | 4.28 |
| 2001/7/3  | 26.24 | 26.28 | 68146.13 | 41659.19 | 3.2  | 109.12 | 247.07 | 268.3 | 4.24 |
| 2001/7/5  | 27.02 | 27.07 | 68146.13 | 41659.19 | 3.14 | 109.68 | 248.99 | 265.8 | 4.21 |
| 2001/7/6  | 28.21 | 28.1  | 68146.13 | 41659.19 | 3.22 | 108.73 | 249.91 | 266.6 | 4.24 |
| 2001/7/9  | 27.59 | 27.63 | 68146.13 | 41659.19 | 3.15 | 109.04 | 247.55 | 267   | 4.21 |
| 2001/7/10 | 27.49 | 27.22 | 68146.13 | 41659.19 | 3.28 | 108.81 | 247.85 | 266.7 | 4.24 |

|           |       |       |          |          |      |        |        |       |      |
|-----------|-------|-------|----------|----------|------|--------|--------|-------|------|
| 2001/7/11 | 27.11 | 27.07 | 68146.13 | 41659.19 | 3.34 | 109.04 | 247.85 | 268.8 | 4.23 |
| 2001/7/12 | 26.8  | 26.85 | 68146.13 | 41659.19 | 3.43 | 109.08 | 248.09 | 267.1 | 4.24 |
| 2001/7/13 | 26.59 | 26.57 | 68146.13 | 41659.19 | 3.25 | 109.55 | 249.3  | 267.6 | 4.28 |
| 2001/7/16 | 26.06 | 26.02 | 68146.13 | 41659.19 | 3.07 | 109.59 | 249.54 | 267.4 | 4.19 |
| 2001/7/17 | 25.57 | 25.33 | 68146.13 | 41659.19 | 3.17 | 109.71 | 250.28 | 268.6 | 4.23 |
| 2001/7/18 | 24.89 | 24.65 | 68146.13 | 41659.19 | 3.09 | 108.38 | 249.42 | 270.8 | 4.27 |
| 2001/7/19 | 24.7  | 24.65 | 68146.13 | 41659.19 | 2.94 | 107.56 | 245.7  | 269.7 | 4.22 |
| 2001/7/20 | 25.59 | 25.67 | 68146.13 | 41659.19 | 2.96 | 107.31 | 244.17 | 270.2 | 4.22 |
| 2001/7/23 | 26.12 | 25.88 | 68146.13 | 41659.19 | 2.98 | 108.24 | 245.05 | 269.1 | 4.24 |
| 2001/7/24 | 26.31 | 26.18 | 68146.13 | 41659.19 | 2.97 | 107.83 | 245.7  | 270   | 4.24 |
| 2001/7/25 | 26.84 | 26.71 | 68146.13 | 41659.19 | 3.28 | 107.58 | 245.58 | 267.8 | 4.21 |
| 2001/7/26 | 26.73 | 26.74 | 68146.13 | 41659.19 | 3.13 | 107.51 | 244.46 | 266.3 | 4.22 |
| 2001/7/27 | 27.02 | 26.98 | 68146.13 | 41659.19 | 3.17 | 107.82 | 244.58 | 267.4 | 4.2  |
| 2001/7/30 | 26.63 | 26.6  | 68146.13 | 41659.19 | 3.35 | 107.68 | 245.17 | 264.6 | 4.21 |
| 2001/7/31 | 26.35 | 26.7  | 68146.13 | 41659.19 | 3.3  | 107.71 | 244.85 | 266.2 | 4.23 |
| 2001/8/1  | 26.77 | 26.83 | 68319.83 | 42497.1  | 3.17 | 107.48 | 244.91 | 267.4 | 4.23 |
| 2001/8/2  | 27.71 | 27.86 | 68319.83 | 42497.1  | 3.17 | 107.71 | 243.63 | 267.4 | 4.24 |
| 2001/8/3  | 27.62 | 27.51 | 68319.83 | 42497.1  | 3.17 | 107.9  | 244.15 | 267.9 | 4.23 |
| 2001/8/6  | 27.74 | 27.7  | 68319.83 | 42497.1  | 3.03 | 108.62 | 244.91 | 267.1 | 4.19 |
| 2001/8/7  | 27.94 | 28.17 | 68319.83 | 42497.1  | 2.97 | 108.8  | 246.56 | 267.2 | 4.17 |
| 2001/8/8  | 27.54 | 27.62 | 68319.83 | 42497.1  | 3.04 | 108.89 | 246.8  | 267.9 | 4.15 |
| 2001/8/9  | 27.64 | 27.72 | 68319.83 | 42497.1  | 2.96 | 108.11 | 246.85 | 273.4 | 4.22 |
| 2001/8/10 | 28.05 | 28.12 | 68319.83 | 42497.1  | 3.04 | 108.3  | 245.26 | 273.9 | 4.15 |
| 2001/8/13 | 27.82 | 27.85 | 68319.83 | 42497.1  | 3    | 108.42 | 245.5  | 275.7 | 4.15 |
| 2001/8/14 | 28.01 | 28.1  | 68319.83 | 42497.1  | 3.09 | 107.9  | 246.32 | 276.3 | 4.2  |
| 2001/8/15 | 27.56 | 27.51 | 68319.83 | 42497.1  | 3.47 | 107.06 | 244.5  | 275.7 | 4.16 |
| 2001/8/16 | 27.4  | 27.47 | 68319.83 | 42497.1  | 3.37 | 106.59 | 241.9  | 275.2 | 4.2  |
| 2001/8/17 | 26.68 | 26.65 | 68319.83 | 42497.1  | 3.3  | 106.67 | 242.13 | 279.3 | 4.27 |
| 2001/8/20 | 27.18 | 27.2  | 68319.83 | 42497.1  | 3.19 | 106.74 | 241.5  | 276.1 | 4.15 |
| 2001/8/21 | 27.91 | 27.93 | 68319.83 | 42497.1  | 3.17 | 106.35 | 241.96 | 275   | 4.19 |
| 2001/8/22 | 26.37 | 27.17 | 68319.83 | 42497.1  | 2.85 | 106.37 | 240.37 | 274.9 | 4.21 |
| 2001/8/23 | 26.63 | 25.63 | 68319.83 | 42497.1  | 2.81 | 106.53 | 240.94 | 275.3 | 4.22 |
| 2001/8/24 | 26.9  | 28.34 | 68319.83 | 42497.1  | 2.71 | 106.85 | 241.11 | 272.5 | 4.19 |
| 2001/8/27 | 26.67 | 26.69 | 68319.83 | 42497.1  | 2.54 | 106.74 | 242.36 | 272.6 | 4.2  |
| 2001/8/28 | 27.17 | 27.16 | 68319.83 | 42497.1  | 2.42 | 106.29 | 242.76 | 272.3 | 4.18 |
| 2001/8/29 | 27.05 | 27.07 | 68319.83 | 42497.1  | 2.3  | 106.17 | 240.37 | 273.7 | 4.19 |
| 2001/8/30 | 26.55 | 26.65 | 68319.83 | 42497.1  | 2.4  | 105.72 | 240.94 | 276.1 | 4.16 |
| 2001/8/31 | 27.2  | 26.65 | 68319.83 | 42497.1  | 2.38 | 105.88 | 238.13 | 275.1 | 4.16 |
| 2001/9/4  | 26.93 | 26.94 | 67852.78 | 41005.53 | 2.36 | 106.71 | 239.59 | 272.3 | 4.14 |
| 2001/9/5  | 26.95 | 27.03 | 67852.78 | 41005.53 | 2.42 | 105.57 | 240.66 | 272.7 | 4.15 |
| 2001/9/6  | 27.58 | 27.54 | 67852.78 | 41005.53 | 2.44 | 105.71 | 238.36 | 273.7 | 4.15 |
| 2001/9/7  | 28.03 | 27.99 | 67852.78 | 41005.53 | 2.5  | 105.33 | 238.47 | 273.8 | 4.14 |
| 2001/9/10 | 27.63 | 27.66 | 67852.78 | 41005.53 | 2.39 | 105.5  | 237.47 | 272.3 | 4.16 |
| 2001/9/14 | 28.03 | 29.59 | 67852.78 | 41005.53 | 2.39 | 104.53 | 236.04 | 291.1 | 4.29 |
| 2001/9/17 | 28.81 | 28.84 | 67852.78 | 41005.53 | 2.37 | 105.01 | 235.23 | 290.3 | 4.38 |
| 2001/9/18 | 27.7  | 27.81 | 67852.78 | 41005.53 | 2.23 | 104.77 | 237.14 | 288.6 | 4.44 |
| 2001/9/19 | 26.72 | 26.73 | 67852.78 | 41005.53 | 2.1  | 104.7  | 236.86 | 291.5 | 4.72 |
| 2001/9/20 | 26.59 | 26.6  | 67852.78 | 41005.53 | 2.14 | 105.01 | 236.7  | 289   | 4.51 |
| 2001/9/21 | 25.97 | 25.46 | 67852.78 | 41005.53 | 2.1  | 105.74 | 237.69 | 291.9 | 4.59 |
| 2001/9/24 | 22.01 | 21.46 | 67852.78 | 41005.53 | 1.91 | 105.18 | 238.69 | 289.7 | 4.57 |
| 2001/9/25 | 21.81 | 21.63 | 67852.78 | 41005.53 | 1.93 | 105.2  | 237.41 | 290.5 | 4.52 |
| 2001/9/26 | 22.38 | 22.4  | 67852.78 | 41005.53 | 1.83 | 104.68 | 236.15 | 293.3 | 4.6  |
| 2001/9/27 | 22.74 | 22.8  | 67852.78 | 41005.53 | 2.25 | 104.42 | 235.99 | 291.7 | 4.61 |
| 2001/9/28 | 23.43 | 23.44 | 67852.78 | 41005.53 | 2.24 | 104.5  | 236.21 | 292.4 | 4.68 |

|            |       |       |          |          |      |        |        |       |      |
|------------|-------|-------|----------|----------|------|--------|--------|-------|------|
| 2001/10/1  | 23.28 | 23.12 | 67750.04 | 41320.94 | 2.21 | 104.17 | 232.76 | 292.2 | 4.67 |
| 2001/10/2  | 22.79 | 22.7  | 67750.04 | 41320.94 | 2.27 | 104.85 | 231.58 | 289.9 | 4.65 |
| 2001/10/3  | 22.08 | 22.17 | 67750.04 | 41320.94 | 2.32 | 104.41 | 232.65 | 290.5 | 4.64 |
| 2001/10/4  | 22.63 | 22.7  | 67750.04 | 41320.94 | 2.41 | 104.33 | 231.85 | 290.5 | 4.66 |
| 2001/10/5  | 22.39 | 22.32 | 67750.04 | 41320.94 | 2.23 | 104.1  | 231.27 | 291.4 | 4.69 |
| 2001/10/8  | 22.45 | 22.25 | 67750.04 | 41320.94 | 2.27 | 104.41 | 230.63 | 292.5 | 4.67 |
| 2001/10/9  | 22.48 | 22.55 | 67750.04 | 41320.94 | 2.39 | 105.54 | 231.9  | 288.9 | 4.55 |
| 2001/10/10 | 22.53 | 22.51 | 67750.04 | 41320.94 | 2.48 | 106.16 | 234.11 | 285.7 | 4.44 |
| 2001/10/11 | 23.34 | 23.49 | 67750.04 | 41320.94 | 2.53 | 106.65 | 235.26 | 281.8 | 4.43 |
| 2001/10/12 | 22.5  | 22.49 | 67750.04 | 41320.94 | 2.43 | 106.21 | 236.25 | 284.9 | 4.47 |
| 2001/10/15 | 22.29 | 22.37 | 67750.04 | 41320.94 | 2.38 | 106.32 | 235.15 | 282.1 | 4.39 |
| 2001/10/16 | 22    | 22.01 | 67750.04 | 41320.94 | 2.59 | 106.37 | 235.92 | 282.3 | 4.35 |
| 2001/10/17 | 21.81 | 21.89 | 67750.04 | 41320.94 | 2.42 | 106.45 | 235.75 | 283.4 | 4.37 |
| 2001/10/18 | 21.31 | 21.33 | 67750.04 | 41320.94 | 2.49 | 106.54 | 235.59 | 279.2 | 4.26 |
| 2001/10/19 | 21.83 | 21.99 | 67750.04 | 41320.94 | 2.68 | 107.32 | 236.64 | 280.1 | 4.27 |
| 2001/10/22 | 21.76 | 21.78 | 67750.04 | 41320.94 | 2.81 | 108.11 | 237.87 | 275.5 | 4.24 |
| 2001/10/23 | 21.85 | 21.28 | 67750.04 | 41320.94 | 2.68 | 108.08 | 239.51 | 276.1 | 4.24 |
| 2001/10/24 | 22.33 | 22    | 67750.04 | 41320.94 | 2.98 | 107.83 | 238.71 | 275.9 | 4.22 |
| 2001/10/25 | 22.01 | 21.75 | 67750.04 | 41320.94 | 2.94 | 107.75 | 238.83 | 277.8 | 4.22 |
| 2001/10/26 | 22.03 | 22.07 | 67750.04 | 41320.94 | 3.04 | 107.16 | 238.09 | 277.9 | 4.22 |
| 2001/10/29 | 22.15 | 22.1  | 67750.04 | 41320.94 | 3.2  | 106.03 | 236.25 | 279.1 | 4.24 |
| 2001/10/30 | 21.87 | 21.83 | 67750.04 | 41320.94 | 3.18 | 106.01 | 233.25 | 281.2 | 4.26 |
| 2001/10/31 | 21.18 | 21.2  | 67750.04 | 41320.94 | 3.29 | 105.83 | 230.28 | 280.5 | 4.23 |
| 2001/11/1  | 20.39 | 20.47 | 68100.41 | 41952.59 | 3.2  | 105.35 | 230.02 | 280.7 | 4.21 |
| 2001/11/2  | 20.18 | 20.24 | 68100.41 | 41952.59 | 3.25 | 105.37 | 228.01 | 280.8 | 4.11 |
| 2001/11/5  | 20.02 | 20    | 68100.41 | 41952.59 | 2.92 | 105.57 | 229.33 | 279.5 | 4.1  |
| 2001/11/6  | 19.92 | 19.93 | 68100.41 | 41952.59 | 2.88 | 105.49 | 229.33 | 280.2 | 4.12 |
| 2001/11/7  | 20.09 | 20.11 | 68100.41 | 41952.59 | 2.87 | 105.38 | 229.33 | 281.3 | 4.13 |
| 2001/11/8  | 21.17 | 21.21 | 68100.41 | 41952.59 | 2.96 | 105.97 | 228.59 | 277.1 | 4.08 |
| 2001/11/9  | 22.22 | 22.23 | 68100.41 | 41952.59 | 2.93 | 105.75 | 230.07 | 277.7 | 4.08 |
| 2001/11/12 | 21.23 | 21.26 | 68100.41 | 41952.59 | 2.73 | 105.99 | 229.43 | 278.6 | 4.12 |
| 2001/11/13 | 21.67 | 21.56 | 68100.41 | 41952.59 | 2.8  | 106.77 | 230.07 | 278   | 4.14 |
| 2001/11/14 | 19.74 | 19.63 | 68100.41 | 41952.59 | 2.68 | 106.88 | 231.68 | 278   | 4.14 |
| 2001/11/15 | 17.45 | 17.5  | 68100.41 | 41952.59 | 2.55 | 107.57 | 231.57 | 275.3 | 4.11 |
| 2001/11/16 | 18.03 | 18.09 | 68100.41 | 41952.59 | 2.64 | 107.92 | 232.88 | 274.9 | 4.1  |
| 2001/11/19 | 17.72 | 17.74 | 68100.41 | 41952.59 | 2.79 | 108.96 | 233.81 | 272.9 | 4.06 |
| 2001/11/20 | 19.15 | 18.71 | 68100.41 | 41952.59 | 2.85 | 108.54 | 234.41 | 273.2 | 4.05 |
| 2001/11/21 | 18.96 | 18.38 | 68100.41 | 41952.59 | 2.81 | 108.75 | 234.19 | 273.1 | 4.04 |
| 2001/11/26 | 18.69 | 18.69 | 68100.41 | 41952.59 | 2.7  | 109.07 | 234.41 | 272.5 | 4.03 |
| 2001/11/27 | 19.48 | 19.57 | 68100.41 | 41952.59 | 2.61 | 108.94 | 234.8  | 273.4 | 4.04 |
| 2001/11/28 | 19.22 | 19.37 | 68100.41 | 41952.59 | 2.32 | 108.12 | 234.08 | 274.1 | 4.12 |
| 2001/11/29 | 18.62 | 18.55 | 68100.41 | 41952.59 | 2.56 | 107.97 | 233.04 | 273.5 | 4.06 |
| 2001/11/30 | 19.44 | 19.46 | 68100.41 | 41952.59 | 2.7  | 108.17 | 230.21 | 273.9 | 4.13 |
| 2001/12/3  | 20.09 | 20.27 | 67692.72 | 41929.82 | 2.63 | 108.8  | 230.21 | 276.9 | 4.2  |
| 2001/12/4  | 19.65 | 19.71 | 67692.72 | 41929.82 | 2.56 | 109.1  | 230.48 | 275.4 | 4.13 |
| 2001/12/5  | 19.49 | 19.62 | 67692.72 | 41929.82 | 2.49 | 109.56 | 230.04 | 273.7 | 4.18 |
| 2001/12/6  | 18.54 | 18.69 | 67692.72 | 41929.82 | 2.57 | 108.58 | 231.4  | 274.2 | 4.22 |
| 2001/12/7  | 19.04 | 19.08 | 67692.72 | 41929.82 | 2.57 | 108.23 | 229.35 | 273.9 | 4.25 |
| 2001/12/10 | 18.37 | 18.32 | 67692.72 | 41929.82 | 2.75 | 108.2  | 227.22 | 272.2 | 4.23 |
| 2001/12/11 | 18.08 | 18.04 | 67692.72 | 41929.82 | 2.8  | 107.9  | 227.11 | 272.2 | 4.26 |
| 2001/12/12 | 18.36 | 18.38 | 67692.72 | 41929.82 | 2.72 | 107.16 | 227.11 | 273.8 | 4.25 |
| 2001/12/13 | 18.12 | 18.2  | 67692.72 | 41929.82 | 2.76 | 107.54 | 224.67 | 273.9 | 4.27 |
| 2001/12/14 | 19.23 | 19.31 | 67692.72 | 41929.82 | 2.85 | 106.64 | 225.03 | 278   | 4.36 |
| 2001/12/17 | 19.22 | 19.28 | 67692.72 | 41929.82 | 2.69 | 106.26 | 222.73 | 277.7 | 4.36 |

|            |       |       |          |          |      |        |        |       |      |
|------------|-------|-------|----------|----------|------|--------|--------|-------|------|
| 2001/12/18 | 19.36 | 19.38 | 67692.72 | 41929.82 | 2.66 | 106.49 | 222.12 | 280.4 | 4.42 |
| 2001/12/19 | 19.8  | 19.37 | 67692.72 | 41929.82 | 2.62 | 106.97 | 222.47 | 275.5 | 4.3  |
| 2001/12/20 | 19.28 | 18.67 | 67692.72 | 41929.82 | 2.69 | 107.11 | 223.64 | 276   | 4.39 |
| 2001/12/21 | 19.62 | 19.3  | 67692.72 | 41929.82 | 2.9  | 107.88 | 224.36 | 278   | 4.47 |
| 2001/12/26 | 21.27 | 21.32 | 67692.72 | 41929.82 | 2.91 | 106.69 | 224.77 | 279.7 | 4.54 |
| 2001/12/27 | 20.9  | 21.07 | 67692.72 | 41929.82 | 2.56 | 106.91 | 224.67 | 277.4 | 4.46 |
| 2001/12/28 | 20.41 | 20.42 | 67692.72 | 41929.82 | 2.77 | 106.94 | 224.67 | 276.8 | 4.49 |
| 2001/12/31 | 19.84 | 19.96 | 67692.72 | 41929.82 | 2.57 | 106.5  | 216.77 | 279   | 4.58 |
| 2002/1/2   | 21.01 | 21.13 | 66957.16 | 42254.11 | 2.47 | 106.66 | 216.77 | 279.2 | 4.53 |
| 2002/1/3   | 20.37 | 20.65 | 66957.16 | 42254.11 | 2.27 | 107.22 | 217.1  | 278.5 | 4.6  |
| 2002/1/4   | 21.62 | 21.47 | 66957.16 | 42254.11 | 2.28 | 106.56 | 218.02 | 279.2 | 4.64 |
| 2002/1/7   | 21.48 | 21.42 | 66957.16 | 42254.11 | 2.27 | 107.1  | 218.02 | 278.9 | 4.66 |
| 2002/1/8   | 21.25 | 20.82 | 66957.16 | 42254.11 | 2.28 | 107.06 | 218.38 | 279.2 | 4.63 |
| 2002/1/9   | 20.18 | 20.32 | 66957.16 | 42254.11 | 2.23 | 107.22 | 215.29 | 283.7 | 4.7  |
| 2002/1/10  | 20.38 | 20.48 | 66957.16 | 42254.11 | 2.19 | 106.92 | 215.75 | 287.4 | 4.69 |
| 2002/1/11  | 19.68 | 19.67 | 66957.16 | 42254.11 | 2.2  | 106.47 | 215.83 | 287.7 | 4.69 |
| 2002/1/14  | 18.89 | 18.88 | 66957.16 | 42254.11 | 2.25 | 106.29 | 214.64 | 285.7 | 4.51 |
| 2002/1/15  | 18.9  | 18.99 | 66957.16 | 42254.11 | 2.29 | 107.04 | 214.57 | 284.7 | 4.55 |
| 2002/1/16  | 18.86 | 18.96 | 66957.16 | 42254.11 | 2.39 | 107.28 | 215.65 | 287.6 | 4.56 |
| 2002/1/17  | 17.97 | 18.2  | 66957.16 | 42254.11 | 2.25 | 107.31 | 215.65 | 284.7 | 4.44 |
| 2002/1/18  | 18    | 18.02 | 66957.16 | 42254.11 | 2.24 | 107.16 | 215.4  | 283.4 | 4.34 |
| 2002/1/22  | 18.34 | 18.36 | 66957.16 | 42254.11 | 2.11 | 107.83 | 216.46 | 281.8 | 4.28 |
| 2002/1/23  | 19.5  | 19.1  | 66957.16 | 42254.11 | 2.08 | 108.23 | 216.4  | 278.9 | 4.25 |
| 2002/1/24  | 19.7  | 19.57 | 66957.16 | 42254.11 | 2.05 | 108.37 | 217.61 | 278.4 | 4.27 |
| 2002/1/25  | 19.99 | 19.8  | 66957.16 | 42254.11 | 2.04 | 109.42 | 217.56 | 279.1 | 4.3  |
| 2002/1/28  | 20.05 | 20.05 | 66957.16 | 42254.11 | 1.91 | 109.48 | 219.01 | 278.5 | 4.24 |
| 2002/1/29  | 19.58 | 19.3  | 66957.16 | 42254.11 | 2.01 | 109.09 | 219.16 | 281.4 | 4.29 |
| 2002/1/30  | 19.08 | 19.11 | 66957.16 | 42254.11 | 2.08 | 108.98 | 218.16 | 281.9 | 4.29 |
| 2002/1/31  | 19.48 | 19.71 | 66957.16 | 42254.11 | 2.14 | 109.28 | 216.1  | 282.1 | 4.22 |
| 2002/2/1   | 20.38 | 20.4  | 67028.49 | 42498.69 | 2.01 | 108.54 | 216.68 | 286   | 4.31 |
| 2002/2/4   | 20.07 | 20.02 | 67028.49 | 42498.69 | 2.12 | 108.08 | 215.47 | 289.3 | 4.3  |
| 2002/2/5   | 20.07 | 20.06 | 67028.49 | 42498.69 | 2.07 | 108.66 | 214.45 | 298.2 | 4.4  |
| 2002/2/6   | 19.78 | 19.77 | 67028.49 | 42498.69 | 2.1  | 108.8  | 215.67 | 297.5 | 4.37 |
| 2002/2/7   | 19.64 | 19.75 | 67028.49 | 42498.69 | 2.15 | 108.72 | 215.94 | 299.7 | 4.35 |
| 2002/2/8   | 20.26 | 20.25 | 67028.49 | 42498.69 | 2.19 | 108.62 | 215.46 | 303.5 | 4.46 |
| 2002/2/11  | 21.41 | 21.29 | 67028.49 | 42498.69 | 2.29 | 108.1  | 214.72 | 300.1 | 4.42 |
| 2002/2/12  | 20.73 | 20.76 | 67028.49 | 42498.69 | 2.31 | 107.2  | 213.47 | 300.7 | 4.49 |
| 2002/2/13  | 21.18 | 21.19 | 67028.49 | 42498.69 | 2.25 | 107.58 | 212.29 | 299.4 | 4.51 |
| 2002/2/14  | 21.23 | 21.19 | 67028.49 | 42498.69 | 2.19 | 107.45 | 212.92 | 299.7 | 4.53 |
| 2002/2/15  | 21.5  | 21.47 | 67028.49 | 42498.69 | 2.21 | 107.32 | 212.75 | 298.4 | 4.54 |
| 2002/2/19  | 20.88 | 20.77 | 67028.49 | 42498.69 | 2.4  | 107.36 | 212.55 | 293.2 | 4.47 |
| 2002/2/20  | 20.29 | 20.31 | 67028.49 | 42498.69 | 2.39 | 107.63 | 212    | 292.3 | 4.4  |
| 2002/2/21  | 20.95 | 20.81 | 67028.49 | 42498.69 | 2.43 | 107.92 | 212.8  | 293.2 | 4.42 |
| 2002/2/22  | 21.07 | 20.92 | 67028.49 | 42498.69 | 2.45 | 107.31 | 213.21 | 293.2 | 4.4  |
| 2002/2/25  | 20.48 | 20.24 | 67028.49 | 42498.69 | 2.31 | 107.87 | 213.21 | 292.7 | 4.37 |
| 2002/2/26  | 21.41 | 21.37 | 67028.49 | 42498.69 | 2.39 | 108.52 | 212.51 | 298   | 4.42 |
| 2002/2/27  | 21.29 | 21.4  | 67028.49 | 42498.69 | 2.43 | 108.29 | 213.88 | 296.6 | 4.42 |
| 2002/2/28  | 21.74 | 21.78 | 67028.49 | 42498.69 | 2.36 | 108.45 | 212.06 | 297.1 | 4.5  |
| 2002/3/1   | 22.4  | 22.37 | 66824.85 | 42069.11 | 2.39 | 108.19 | 212.47 | 298.4 | 4.55 |
| 2002/3/4   | 22.45 | 22.55 | 66824.85 | 42069.11 | 2.49 | 107.91 | 211.5  | 297.1 | 4.59 |
| 2002/3/5   | 23.17 | 23.18 | 66824.85 | 42069.11 | 2.47 | 107.8  | 211.19 | 294.4 | 4.54 |
| 2002/3/6   | 23.15 | 23.32 | 66824.85 | 42069.11 | 2.57 | 107.93 | 211.08 | 293.9 | 4.52 |
| 2002/3/7   | 23.71 | 23.62 | 66824.85 | 42069.11 | 2.76 | 107.49 | 210.85 | 290.5 | 4.47 |
| 2002/3/8   | 23.84 | 23.87 | 66824.85 | 42069.11 | 2.8  | 108.03 | 210.85 | 290.3 | 4.49 |



|           |       |       |          |          |      |        |        |       |      |
|-----------|-------|-------|----------|----------|------|--------|--------|-------|------|
| 2002/3/11 | 24.31 | 24.36 | 66824.85 | 42069.11 | 3.02 | 108.1  | 210.83 | 291.3 | 4.47 |
| 2002/3/12 | 24.2  | 24.55 | 66824.85 | 42069.11 | 3.02 | 108.42 | 211.31 | 293.8 | 4.49 |
| 2002/3/13 | 24.16 | 24.14 | 66824.85 | 42069.11 | 2.87 | 108.43 | 212    | 293.8 | 4.52 |
| 2002/3/14 | 24.56 | 24.48 | 66824.85 | 42069.11 | 2.92 | 108.02 | 211.95 | 291.2 | 4.49 |
| 2002/3/15 | 24.51 | 24.47 | 66824.85 | 42069.11 | 3.08 | 107.82 | 210.7  | 290.1 | 4.48 |
| 2002/3/18 | 25.11 | 25.03 | 66824.85 | 42069.11 | 3.31 | 107.59 | 210.5  | 292.3 | 4.49 |
| 2002/3/19 | 24.88 | 25.02 | 66824.85 | 42069.11 | 3.26 | 107.76 | 209.82 | 293   | 4.51 |
| 2002/3/20 | 24.9  | 24.92 | 66824.85 | 42069.11 | 3.11 | 107.49 | 210.02 | 292.4 | 4.52 |
| 2002/3/21 | 25.61 | 25.74 | 66824.85 | 42069.11 | 3.43 | 107.69 | 209.39 | 293.1 | 4.5  |
| 2002/3/22 | 25.35 | 25.56 | 66824.85 | 42069.11 | 3.33 | 107.71 | 209.61 | 297.6 | 4.53 |
| 2002/3/25 | 24.99 | 25.69 | 66824.85 | 42069.11 | 3.46 | 107.66 | 209.57 | 297.4 | 4.57 |
| 2002/3/26 | 25.36 | 25.75 | 66824.85 | 42069.11 | 3.47 | 107.57 | 209.58 | 296.8 | 4.58 |
| 2002/3/27 | 25.87 | 25.79 | 66824.85 | 42069.11 | 3.29 | 107.75 | 209.79 | 302.2 | 4.68 |
| 2002/3/28 | 26.31 | 26.21 | 66824.85 | 42069.11 | 3.28 | 107.66 | 210.26 | 302.6 | 4.65 |
| 2002/4/1  | 26.88 | 26.82 | 66288.45 | 41369.82 | 3.53 | 106.32 | 207.75 | 303.2 | 4.7  |
| 2002/4/2  | 27.71 | 27.75 | 66288.45 | 41369.82 | 3.65 | 106.69 | 206.08 | 305.9 | 4.75 |
| 2002/4/3  | 27.56 | 27.55 | 66288.45 | 41369.82 | 3.51 | 106.71 | 206.24 | 302.6 | 4.67 |
| 2002/4/4  | 26.58 | 26.64 | 66288.45 | 41369.82 | 3.33 | 106.85 | 206.46 | 301.1 | 4.63 |
| 2002/4/5  | 26.21 | 26.21 | 66288.45 | 41369.82 | 3.28 | 106.93 | 206.64 | 300.1 | 4.58 |
| 2002/4/8  | 26.54 | 26.16 | 66288.45 | 41369.82 | 3.33 | 107.12 | 206.78 | 300.5 | 4.57 |
| 2002/4/9  | 25.82 | 25.45 | 66288.45 | 41369.82 | 3.2  | 106.73 | 207.19 | 298.8 | 4.56 |
| 2002/4/10 | 26.13 | 26.15 | 66288.45 | 41369.82 | 3.18 | 106.66 | 206.26 | 301.7 | 4.63 |
| 2002/4/11 | 24.99 | 24.93 | 66288.45 | 41369.82 | 3.1  | 106.51 | 206.31 | 302.2 | 4.58 |
| 2002/4/12 | 23.47 | 23.51 | 66288.45 | 41369.82 | 3.13 | 106.68 | 206.34 | 302.1 | 4.59 |
| 2002/4/15 | 24.57 | 24.53 | 66288.45 | 41369.82 | 3.43 | 106.55 | 206.48 | 300   | 4.45 |
| 2002/4/16 | 24.75 | 24.92 | 66288.45 | 41369.82 | 3.29 | 106.49 | 206.37 | 298.8 | 4.41 |
| 2002/4/17 | 25.94 | 25.94 | 66288.45 | 41369.82 | 3.48 | 106.1  | 205.75 | 302.1 | 4.45 |
| 2002/4/18 | 26.18 | 25.86 | 66288.45 | 41369.82 | 3.49 | 105.79 | 205.13 | 304.5 | 4.5  |
| 2002/4/19 | 26.38 | 26.43 | 66288.45 | 41369.82 | 3.53 | 105.81 | 204.66 | 302.3 | 4.5  |
| 2002/4/22 | 26.27 | 26.28 | 66288.45 | 41369.82 | 3.6  | 105.68 | 205.06 | 303   | 4.54 |
| 2002/4/23 | 26.62 | 26.28 | 66288.45 | 41369.82 | 3.59 | 105.88 | 204.74 | 304   | 4.57 |
| 2002/4/24 | 26.38 | 26.28 | 66288.45 | 41369.82 | 3.42 | 105.8  | 204.93 | 304.3 | 4.56 |
| 2002/4/25 | 26.73 | 26.36 | 66288.45 | 41369.82 | 3.3  | 105.33 | 204.28 | 308.1 | 4.62 |
| 2002/4/26 | 27.11 | 27.12 | 66288.45 | 41369.82 | 3.32 | 105.18 | 203.66 | 311.6 | 4.65 |
| 2002/4/29 | 27.57 | 27.45 | 66288.45 | 41369.82 | 3.56 | 105.05 | 203.09 | 311.5 | 4.64 |
| 2002/4/30 | 27.29 | 27.32 | 66288.45 | 41369.82 | 3.8  | 105.17 | 200.51 | 309.2 | 4.53 |
| 2002/5/1  | 26.75 | 26.58 | 66859.48 | 40323.96 | 3.74 | 105.01 | 200.51 | 309.4 | 4.53 |
| 2002/5/2  | 26.24 | 26.31 | 66859.48 | 40323.96 | 3.68 | 105    | 200.51 | 308.6 | 4.54 |
| 2002/5/3  | 26.62 | 26.75 | 66859.48 | 40323.96 | 3.75 | 104.72 | 200.51 | 312.5 | 4.6  |
| 2002/5/6  | 26.12 | 26.11 | 66859.48 | 40323.96 | 3.6  | 104.69 | 199.05 | 311.5 | 4.6  |
| 2002/5/7  | 26.63 | 26.79 | 66859.48 | 40323.96 | 3.67 | 104.71 | 199.04 | 311.9 | 4.62 |
| 2002/5/8  | 27.85 | 27.76 | 66859.48 | 40323.96 | 3.75 | 105.56 | 199.2  | 308.5 | 4.57 |
| 2002/5/9  | 27.68 | 27.78 | 66859.48 | 40323.96 | 3.72 | 105.31 | 199.2  | 309.8 | 4.62 |
| 2002/5/10 | 27.99 | 27.92 | 66859.48 | 40323.96 | 3.75 | 105.09 | 199.2  | 311.3 | 4.66 |
| 2002/5/13 | 28.38 | 28.62 | 66859.48 | 40323.96 | 3.78 | 105.44 | 199.22 | 310.9 | 4.6  |
| 2002/5/14 | 29.36 | 29.17 | 66859.48 | 40323.96 | 3.86 | 106.03 | 200.53 | 307.6 | 4.6  |
| 2002/5/15 | 28.15 | 28.17 | 66859.48 | 40323.96 | 3.64 | 105.25 | 201.21 | 309   | 4.63 |
| 2002/5/16 | 27.95 | 28    | 66859.48 | 40323.96 | 3.61 | 105.49 | 199.97 | 310.1 | 4.64 |
| 2002/5/17 | 28.18 | 28.19 | 66859.48 | 40323.96 | 3.6  | 105.27 | 200.18 | 310.9 | 4.65 |
| 2002/5/20 | 28.33 | 28.24 | 66859.48 | 40323.96 | 3.49 | 105.26 | 199.35 | 316   | 4.77 |
| 2002/5/21 | 27.33 | 27.35 | 66859.48 | 40323.96 | 3.4  | 105.27 | 199.77 | 316.1 | 4.83 |
| 2002/5/22 | 26.37 | 27.01 | 66859.48 | 40323.96 | 3.46 | 105.36 | 199.72 | 318.3 | 4.83 |
| 2002/5/23 | 26.15 | 26.6  | 66859.48 | 40323.96 | 3.44 | 105.66 | 200    | 322.8 | 4.9  |
| 2002/5/24 | 25.88 | 26.69 | 66859.48 | 40323.96 | 3.35 | 105.47 | 200.24 | 320.7 | 4.86 |

|           |       |       |          |          |      |        |        |       |      |
|-----------|-------|-------|----------|----------|------|--------|--------|-------|------|
| 2002/5/28 | 25.27 | 25.08 | 66859.48 | 40323.96 | 3.28 | 105.29 | 199.81 | 324.1 | 4.87 |
| 2002/5/29 | 25.76 | 25.64 | 66859.48 | 40323.96 | 3.42 | 105.06 | 199.57 | 325.5 | 4.93 |
| 2002/5/30 | 24.67 | 24.78 | 66859.48 | 40323.96 | 3.22 | 104.86 | 198.95 | 325.5 | 4.99 |
| 2002/5/31 | 25.31 | 25.37 | 66859.48 | 40323.96 | 3.22 | 105.54 | 197.6  | 326.5 | 5.04 |
| 2002/6/3  | 25.08 | 25.1  | 66705.97 | 41448.21 | 3.24 | 105.02 | 198.62 | 326.7 | 5.08 |
| 2002/6/4  | 25.33 | 25.32 | 66705.97 | 41448.21 | 3.33 | 105.2  | 197.66 | 327.8 | 5.13 |
| 2002/6/5  | 24.89 | 25.02 | 66705.97 | 41448.21 | 3.26 | 105.25 | 198.13 | 321.2 | 4.95 |
| 2002/6/6  | 24.79 | 24.89 | 66705.97 | 41448.21 | 3.18 | 105.2  | 198.49 | 324.9 | 5    |
| 2002/6/7  | 24.75 | 24.72 | 66705.97 | 41448.21 | 3.2  | 105.2  | 197.8  | 324.6 | 4.98 |
| 2002/6/10 | 24.29 | 24.24 | 66705.97 | 41448.21 | 3.14 | 105.19 | 198.08 | 318.7 | 4.91 |
| 2002/6/11 | 24.12 | 24.21 | 66705.97 | 41448.21 | 3.13 | 104.33 | 197.55 | 319.7 | 4.88 |
| 2002/6/12 | 24.64 | 24.79 | 66705.97 | 41448.21 | 3.06 | 104.4  | 197.55 | 320.3 | 4.92 |
| 2002/6/13 | 25.64 | 25.54 | 66705.97 | 41448.21 | 3.21 | 104.39 | 196.44 | 317.7 | 4.83 |
| 2002/6/14 | 25.94 | 25.9  | 66705.97 | 41448.21 | 3.34 | 103.94 | 195.9  | 319.1 | 4.85 |
| 2002/6/17 | 26.09 | 25.98 | 66705.97 | 41448.21 | 3.38 | 103.82 | 195.57 | 317.4 | 4.82 |
| 2002/6/18 | 25.43 | 25.36 | 66705.97 | 41448.21 | 3.31 | 102.97 | 194.82 | 319.2 | 4.85 |
| 2002/6/19 | 25.31 | 25.57 | 66705.97 | 41448.21 | 3.31 | 102.97 | 193.04 | 319.8 | 4.84 |
| 2002/6/20 | 25.53 | 25.62 | 66705.97 | 41448.21 | 3.22 | 102.47 | 193.24 | 323.2 | 4.87 |
| 2002/6/21 | 25.82 | 25.51 | 66705.97 | 41448.21 | 3.24 | 102.64 | 192.12 | 324.6 | 4.86 |
| 2002/6/24 | 26.47 | 26.31 | 66705.97 | 41448.21 | 3.43 | 101.91 | 192.07 | 324.3 | 4.87 |
| 2002/6/25 | 26.32 | 26.06 | 66705.97 | 41448.21 | 3.45 | 102.02 | 191.91 | 320.2 | 4.83 |
| 2002/6/26 | 26.76 | 26.67 | 66705.97 | 41448.21 | 3.28 | 100.46 | 189.65 | 320.5 | 4.85 |
| 2002/6/27 | 26.86 | 26.77 | 66705.97 | 41448.21 | 3.24 | 100.56 | 188.98 | 319.6 | 4.88 |
| 2002/6/28 | 26.86 | 26.79 | 66705.97 | 41448.21 | 3.25 | 100.3  | 188.82 | 313.9 | 4.83 |
| 2002/7/1  | 26.81 | 26.79 | 67186.75 | 42318.9  | 3.19 | 99.96  | 185.91 | 314.4 | 4.87 |
| 2002/7/2  | 26.77 | 26.83 | 67186.75 | 42318.9  | 3.15 | 99.79  | 186.29 | 313.2 | 4.93 |
| 2002/7/3  | 26.8  | 26.82 | 67186.75 | 42318.9  | 3.14 | 100.24 | 186.24 | 311.3 | 4.94 |
| 2002/7/8  | 26.07 | 26.14 | 67186.75 | 42318.9  | 2.94 | 99.49  | 185.58 | 312.5 | 4.96 |
| 2002/7/9  | 26.09 | 26.16 | 67186.75 | 42318.9  | 2.99 | 98.75  | 184.58 | 316.5 | 5.04 |
| 2002/7/10 | 26.77 | 26.73 | 67186.75 | 42318.9  | 2.86 | 98.91  | 183.39 | 315.1 | 5.03 |
| 2002/7/11 | 26.83 | 27.01 | 67186.75 | 42318.9  | 2.83 | 98.23  | 183.68 | 317.6 | 5.07 |
| 2002/7/12 | 27.48 | 27.48 | 67186.75 | 42318.9  | 2.79 | 98.66  | 183.4  | 315.9 | 5.05 |
| 2002/7/15 | 27.07 | 27.23 | 67186.75 | 42318.9  | 2.78 | 97.4   | 183.26 | 319.9 | 5.1  |
| 2002/7/16 | 27.75 | 27.68 | 67186.75 | 42318.9  | 2.86 | 97.38  | 181.48 | 317.5 | 5.02 |
| 2002/7/17 | 27.88 | 27.88 | 67186.75 | 42318.9  | 2.84 | 97.32  | 180.75 | 317.7 | 4.99 |
| 2002/7/18 | 27.57 | 27.5  | 67186.75 | 42318.9  | 2.94 | 97.35  | 181.5  | 317.1 | 4.99 |
| 2002/7/19 | 27.83 | 27.83 | 67186.75 | 42318.9  | 2.93 | 96.92  | 179.94 | 323.9 | 5.06 |
| 2002/7/22 | 26.6  | 26.61 | 67186.75 | 42318.9  | 2.95 | 97.02  | 180.66 | 323.4 | 5.03 |
| 2002/7/23 | 26.31 | 26.61 | 67186.75 | 42318.9  | 2.89 | 98.24  | 181.31 | 312.6 | 4.87 |
| 2002/7/24 | 26.87 | 26.78 | 67186.75 | 42318.9  | 3.04 | 97.06  | 182.21 | 311.5 | 4.85 |
| 2002/7/25 | 26.77 | 26.67 | 67186.75 | 42318.9  | 2.9  | 96.71  | 180.33 | 309.7 | 4.85 |
| 2002/7/26 | 26.54 | 26.55 | 67186.75 | 42318.9  | 2.94 | 97.8   | 180.4  | 303.3 | 4.66 |
| 2002/7/29 | 26.55 | 26.54 | 67186.75 | 42318.9  | 2.98 | 97.96  | 182.14 | 301.5 | 4.64 |
| 2002/7/30 | 27.36 | 27.43 | 67186.75 | 42318.9  | 2.89 | 97.3   | 182.74 | 303.7 | 4.66 |
| 2002/7/31 | 27.02 | 27.02 | 67186.75 | 42318.9  | 2.95 | 97.93  | 181.88 | 303.2 | 4.6  |
| 2002/8/1  | 26.47 | 26.51 | 66914.73 | 42225.97 | 2.84 | 98.03  | 182.64 | 304   | 4.58 |
| 2002/8/2  | 26.84 | 26.87 | 66914.73 | 42225.97 | 2.86 | 97.44  | 182.54 | 307   | 4.59 |
| 2002/8/5  | 26.58 | 26.55 | 66914.73 | 42225.97 | 2.68 | 97.93  | 181.94 | 307.8 | 4.63 |
| 2002/8/6  | 27.17 | 27.18 | 66914.73 | 42225.97 | 2.72 | 99.51  | 183.11 | 305.5 | 4.61 |
| 2002/8/7  | 26.5  | 26.58 | 66914.73 | 42225.97 | 2.66 | 99.41  | 184.98 | 314.3 | 4.68 |
| 2002/8/8  | 26.67 | 26.67 | 66914.73 | 42225.97 | 2.75 | 99.92  | 185.15 | 310.4 | 4.64 |
| 2002/8/9  | 26.86 | 26.87 | 66914.73 | 42225.97 | 2.76 | 100.31 | 185.61 | 314.2 | 4.67 |
| 2002/8/12 | 27.86 | 27.84 | 66914.73 | 42225.97 | 2.97 | 99.84  | 186.57 | 314.1 | 4.59 |
| 2002/8/13 | 27.9  | 28.35 | 66914.73 | 42225.97 | 2.98 | 99.62  | 186.25 | 314.2 | 4.58 |

|            |       |       |          |          |      |        |        |       |      |
|------------|-------|-------|----------|----------|------|--------|--------|-------|------|
| 2002/8/14  | 28.15 | 28.19 | 66914.73 | 42225.97 | 2.91 | 99.37  | 185.27 | 311.8 | 4.46 |
| 2002/8/15  | 29.06 | 28.99 | 66914.73 | 42225.97 | 3.13 | 99.44  | 185.69 | 314.3 | 4.48 |
| 2002/8/16  | 29.33 | 29.24 | 66914.73 | 42225.97 | 3.15 | 99.53  | 185.63 | 313.7 | 4.49 |
| 2002/8/19  | 29.84 | 29.86 | 66914.73 | 42225.97 | 3.27 | 100.17 | 184.93 | 306   | 4.41 |
| 2002/8/20  | 30.11 | 30.12 | 66914.73 | 42225.97 | 3.17 | 99.99  | 186.35 | 308.7 | 4.44 |
| 2002/8/21  | 29.24 | 30.37 | 66914.73 | 42225.97 | 3.27 | 99.81  | 185.75 | 307.6 | 4.42 |
| 2002/8/22  | 28.84 | 30.11 | 66914.73 | 42225.97 | 3.52 | 100.49 | 186.59 | 306.6 | 4.47 |
| 2002/8/23  | 28.63 | 29.99 | 66914.73 | 42225.97 | 3.49 | 100.67 | 187.42 | 306.7 | 4.42 |
| 2002/8/26  | 29.28 | 29.23 | 66914.73 | 42225.97 | 3.62 | 100.49 | 187.29 | 309.4 | 4.44 |
| 2002/8/27  | 28.83 | 28.84 | 66914.73 | 42225.97 | 3.48 | 99.61  | 186.63 | 312.3 | 4.5  |
| 2002/8/28  | 28.34 | 28.31 | 66914.73 | 42225.97 | 3.29 | 99.55  | 185.84 | 309.4 | 4.5  |
| 2002/8/29  | 28.92 | 28.83 | 66914.73 | 42225.97 | 3.25 | 98.78  | 185.36 | 313.3 | 4.53 |
| 2002/8/30  | 28.98 | 28.97 | 66914.73 | 42225.97 | 3.3  | 98.68  | 183.8  | 312.8 | 4.44 |
| 2002/9/3   | 27.79 | 27.76 | 67465.25 | 41571.42 | 3.13 | 97.94  | 182.9  | 313.9 | 4.45 |
| 2002/9/4   | 28.27 | 28.28 | 67465.25 | 41571.42 | 3.19 | 97.83  | 181.52 | 315.4 | 4.47 |
| 2002/9/5   | 28.98 | 29.06 | 67465.25 | 41571.42 | 3.34 | 97.64  | 181.09 | 318.7 | 4.52 |
| 2002/9/6   | 29.61 | 29.51 | 67465.25 | 41571.42 | 3.27 | 98.27  | 181.1  | 320.4 | 4.51 |
| 2002/9/9   | 29.73 | 29.8  | 67465.25 | 41571.42 | 3.4  | 98.37  | 181.99 | 321.7 | 4.58 |
| 2002/9/10  | 29.73 | 29.62 | 67465.25 | 41571.42 | 3.36 | 98.4   | 182.81 | 318.3 | 4.56 |
| 2002/9/11  | 29.77 | 29.77 | 67465.25 | 41571.42 | 3.25 | 98.65  | 182.46 | 317   | 4.54 |
| 2002/9/12  | 28.85 | 28.95 | 67465.25 | 41571.42 | 3.33 | 98.1   | 182.83 | 319.3 | 4.59 |
| 2002/9/13  | 29.81 | 29.83 | 67465.25 | 41571.42 | 3.47 | 98.61  | 181.9  | 317   | 4.55 |
| 2002/9/16  | 29.67 | 29.14 | 67465.25 | 41571.42 | 3.51 | 99.16  | 183.17 | 317.5 | 4.55 |
| 2002/9/17  | 29.08 | 29.08 | 67465.25 | 41571.42 | 3.68 | 99.46  | 184.86 | 317.3 | 4.58 |
| 2002/9/18  | 29.48 | 29.57 | 67465.25 | 41571.42 | 3.79 | 98.79  | 184.7  | 320.9 | 4.62 |
| 2002/9/19  | 29.5  | 29.49 | 67465.25 | 41571.42 | 3.86 | 98.39  | 183.1  | 322.9 | 4.64 |
| 2002/9/20  | 29.61 | 29.65 | 67465.25 | 41571.42 | 3.76 | 98.51  | 182.71 | 322.2 | 4.63 |
| 2002/9/23  | 30.71 | 30.85 | 67465.25 | 41571.42 | 3.98 | 98.69  | 182.71 | 323.1 | 4.63 |
| 2002/9/24  | 30.77 | 30.79 | 67465.25 | 41571.42 | 3.74 | 98.2   | 182.85 | 326   | 4.65 |
| 2002/9/25  | 30.64 | 30.69 | 67465.25 | 41571.42 | 3.49 | 98.22  | 181.83 | 322.3 | 4.58 |
| 2002/9/26  | 30.41 | 30.31 | 67465.25 | 41571.42 | 3.69 | 98.23  | 181.92 | 320.4 | 4.51 |
| 2002/9/27  | 30.54 | 30.53 | 67465.25 | 41571.42 | 4.04 | 98.09  | 182.28 | 319.7 | 4.51 |
| 2002/9/30  | 30.45 | 30.59 | 67465.25 | 41571.42 | 4.14 | 97.59  | 179.4  | 323.9 | 4.55 |
| 2002/10/1  | 30.83 | 30.71 | 68876.21 | 41969.5  | 4.07 | 97.65  | 178.38 | 320.9 | 4.49 |
| 2002/10/2  | 30.49 | 30.59 | 68876.21 | 41969.5  | 4.16 | 97.65  | 179.52 | 321.5 | 4.49 |
| 2002/10/3  | 29.76 | 29.73 | 68876.21 | 41969.5  | 3.72 | 97.51  | 178.85 | 321.1 | 4.49 |
| 2002/10/4  | 29.62 | 29.65 | 68876.21 | 41969.5  | 3.74 | 97.67  | 179.01 | 322.1 | 4.49 |
| 2002/10/7  | 29.64 | 29.65 | 68876.21 | 41969.5  | 3.74 | 97.79  | 179.34 | 321.9 | 4.45 |
| 2002/10/8  | 29.48 | 29.56 | 68876.21 | 41969.5  | 3.86 | 98.48  | 179.32 | 318.2 | 4.37 |
| 2002/10/9  | 29.35 | 29.31 | 68876.21 | 41969.5  | 3.92 | 97.77  | 180.52 | 319.6 | 4.35 |
| 2002/10/10 | 28.97 | 28.96 | 68876.21 | 41969.5  | 3.83 | 97.77  | 179.46 | 316.5 | 4.29 |
| 2002/10/11 | 29.37 | 29.36 | 68876.21 | 41969.5  | 4.15 | 97.97  | 179.54 | 316.3 | 4.32 |
| 2002/10/14 | 30.03 | 30.06 | 68876.21 | 41969.5  | 4.3  | 98.25  | 179.79 | 317.8 | 4.31 |
| 2002/10/15 | 29.72 | 29.73 | 68876.21 | 41969.5  | 4.25 | 98.6   | 180.52 | 312.6 | 4.32 |
| 2002/10/16 | 29.47 | 29.28 | 68876.21 | 41969.5  | 4.23 | 98.46  | 180.57 | 314   | 4.37 |
| 2002/10/17 | 29.62 | 29.61 | 68876.21 | 41969.5  | 4.3  | 98.6   | 181.15 | 311.6 | 4.35 |
| 2002/10/18 | 29.6  | 29.56 | 68876.21 | 41969.5  | 4.24 | 98.97  | 181.59 | 312.7 | 4.36 |
| 2002/10/21 | 28.37 | 28.31 | 68876.21 | 41969.5  | 4.16 | 99.11  | 181.21 | 310.9 | 4.35 |
| 2002/10/22 | 27.92 | 27.93 | 68876.21 | 41969.5  | 4.11 | 98.86  | 181.65 | 313   | 4.41 |
| 2002/10/23 | 28.18 | 28.19 | 68876.21 | 41969.5  | 4.26 | 98.86  | 181.51 | 312   | 4.41 |
| 2002/10/24 | 28.2  | 27.87 | 68876.21 | 41969.5  | 4.13 | 98.61  | 181.3  | 310.7 | 4.36 |
| 2002/10/25 | 27.05 | 27.09 | 68876.21 | 41969.5  | 4.03 | 98.65  | 180.47 | 313.4 | 4.41 |
| 2002/10/28 | 27.29 | 27.25 | 68876.21 | 41969.5  | 4.18 | 98.11  | 181.13 | 315.2 | 4.41 |
| 2002/10/29 | 26.86 | 26.81 | 68876.21 | 41969.5  | 4.13 | 98.17  | 180.06 | 317.7 | 4.51 |

|            |       |       |          |          |      |       |        |       |      |
|------------|-------|-------|----------|----------|------|-------|--------|-------|------|
| 2002/10/30 | 26.81 | 26.85 | 68876.21 | 41969.5  | 4.39 | 98.2  | 180.15 | 316.9 | 4.49 |
| 2002/10/31 | 27.22 | 27.18 | 68876.21 | 41969.5  | 4.16 | 97.8  | 176.67 | 318.4 | 4.51 |
| 2002/11/1  | 27.13 | 27.04 | 69006.41 | 43427.37 | 4.06 | 97.85 | 176.17 | 319.2 | 4.49 |
| 2002/11/4  | 26.95 | 26.89 | 69006.41 | 43427.37 | 3.86 | 98.34 | 176.26 | 318.7 | 4.49 |
| 2002/11/5  | 26.14 | 26.06 | 69006.41 | 43427.37 | 3.88 | 97.89 | 176.88 | 318.6 | 4.5  |
| 2002/11/6  | 25.77 | 25.72 | 69006.41 | 43427.37 | 3.85 | 97.8  | 176.9  | 317.9 | 4.48 |
| 2002/11/7  | 25.38 | 25.36 | 69006.41 | 43427.37 | 3.83 | 96.76 | 176.9  | 320.9 | 4.55 |
| 2002/11/8  | 25.78 | 25.83 | 69006.41 | 43427.37 | 3.9  | 96.16 | 176.9  | 321.7 | 4.53 |
| 2002/11/11 | 25.94 | 26.02 | 69006.41 | 43427.37 | 3.78 | 96.45 | 173.21 | 321.6 | 4.57 |
| 2002/11/12 | 25.9  | 26.19 | 69006.41 | 43427.37 | 3.87 | 96.31 | 173.56 | 324.7 | 4.6  |
| 2002/11/13 | 25.19 | 25.28 | 69006.41 | 43427.37 | 3.88 | 96.54 | 173.22 | 318.9 | 4.56 |
| 2002/11/14 | 25.29 | 25.4  | 69006.41 | 43427.37 | 3.87 | 96.8  | 173.73 | 318.1 | 4.56 |
| 2002/11/15 | 25.51 | 25.5  | 69006.41 | 43427.37 | 3.98 | 96.84 | 174.17 | 320.9 | 4.58 |
| 2002/11/18 | 26.71 | 26.71 | 69006.41 | 43427.37 | 4.26 | 96.76 | 174.21 | 319.4 | 4.54 |
| 2002/11/19 | 26.42 | 26.41 | 69006.41 | 43427.37 | 4.26 | 96.84 | 173.91 | 318.8 | 4.55 |
| 2002/11/20 | 26.98 | 27    | 69006.41 | 43427.37 | 4.25 | 97.22 | 174.21 | 317.6 | 4.54 |
| 2002/11/21 | 26.35 | 27.07 | 69006.41 | 43427.37 | 4.35 | 96.92 | 174.76 | 317.6 | 4.47 |
| 2002/11/22 | 26.76 | 27.73 | 69006.41 | 43427.37 | 4.26 | 96.89 | 173.99 | 320.9 | 4.54 |
| 2002/11/25 | 26.11 | 27.01 | 69006.41 | 43427.37 | 4.26 | 97.85 | 174.58 | 317.9 | 4.47 |
| 2002/11/26 | 26.4  | 26.6  | 69006.41 | 43427.37 | 4.14 | 98.64 | 175.59 | 317.7 | 4.43 |
| 2002/11/27 | 26.89 | 26.87 | 69006.41 | 43427.37 | 4.2  | 98.95 | 177.13 | 316.8 | 4.41 |
| 2002/12/2  | 27.24 | 27.27 | 67352.85 | 42944.62 | 4.32 | 98.74 | 174.46 | 317.6 | 4.42 |
| 2002/12/3  | 27.3  | 27.34 | 67352.85 | 42944.62 | 4.23 | 98.11 | 174.51 | 320.2 | 4.53 |
| 2002/12/4  | 26.71 | 26.8  | 67352.85 | 42944.62 | 4.3  | 98.17 | 172.87 | 322.2 | 4.56 |
| 2002/12/5  | 27.29 | 27.27 | 67352.85 | 42944.62 | 4.41 | 97.98 | 173.31 | 324.8 | 4.62 |
| 2002/12/6  | 26.93 | 27.03 | 67352.85 | 42944.62 | 4.38 | 97.76 | 172.7  | 326.3 | 4.63 |
| 2002/12/9  | 27.2  | 27.29 | 67352.85 | 42944.62 | 4.36 | 97.56 | 172.11 | 325.8 | 4.6  |
| 2002/12/10 | 27.74 | 27.73 | 67352.85 | 42944.62 | 4.64 | 97.95 | 171.67 | 323.5 | 4.61 |
| 2002/12/11 | 27.4  | 27.49 | 67352.85 | 42944.62 | 4.71 | 97.62 | 172.68 | 324.8 | 4.63 |
| 2002/12/12 | 28.01 | 28.2  | 67352.85 | 42944.62 | 5.09 | 97.32 | 172.68 | 331.4 | 4.74 |
| 2002/12/13 | 28.44 | 28.39 | 67352.85 | 42944.62 | 5.28 | 96.84 | 172.68 | 333.2 | 4.7  |
| 2002/12/16 | 30.1  | 30.15 | 67352.85 | 42944.62 | 5.34 | 96.69 | 170.76 | 337   | 4.7  |
| 2002/12/17 | 30.1  | 30.04 | 67352.85 | 42944.62 | 5.24 | 96.3  | 170.15 | 337.4 | 4.64 |
| 2002/12/18 | 30.44 | 30.41 | 67352.85 | 42944.62 | 5.28 | 96.17 | 170.17 | 342.1 | 4.67 |
| 2002/12/19 | 30.56 | 30.57 | 67352.85 | 42944.62 | 5.05 | 95.99 | 169.57 | 345.9 | 4.73 |
| 2002/12/20 | 30.3  | 30.57 | 67352.85 | 42944.62 | 5.18 | 96.04 | 169.74 | 340.5 | 4.63 |
| 2002/12/23 | 31.75 | 32.09 | 67352.85 | 42944.62 | 5.12 | 96.7  | 169.72 | 345.1 | 4.65 |
| 2002/12/24 | 31.97 | 32.13 | 67352.85 | 42944.62 | 5.15 | 96.52 | 171.03 | 346.8 | 4.66 |
| 2002/12/26 | 32.49 | 32.61 | 67352.85 | 42944.62 | 4.96 | 96.23 | 170.53 | 348.9 | 4.7  |
| 2002/12/27 | 32.72 | 32.68 | 67352.85 | 42944.62 | 4.99 | 96    | 170.15 | 349.2 | 4.71 |
| 2002/12/30 | 31.37 | 31.41 | 67352.85 | 42944.62 | 4.8  | 95.9  | 169.97 | 344.1 | 4.66 |
| 2002/12/31 | 31.2  | 31.21 | 67352.85 | 42944.62 | 4.79 | 95.55 | 164.8  | 348.2 | 4.8  |
| 2003/1/2   | 31.85 | 31.97 | 67750.17 | 43837.49 | 5.25 | 95.58 | 164.8  | 346.5 | 4.81 |
| 2003/1/3   | 33.08 | 33.26 | 67750.17 | 43837.49 | 5.34 | 94.73 | 164.8  | 351.6 | 4.89 |
| 2003/1/6   | 32.1  | 32.29 | 67750.17 | 43837.49 | 4.94 | 94.67 | 164.8  | 352.1 | 4.9  |
| 2003/1/7   | 31.08 | 31.2  | 67750.17 | 43837.49 | 5.13 | 94.91 | 164.8  | 347.7 | 4.8  |
| 2003/1/8   | 30.56 | 30.66 | 67750.17 | 43837.49 | 5.16 | 94.45 | 164.26 | 354.3 | 4.86 |
| 2003/1/9   | 31.99 | 31.95 | 67750.17 | 43837.49 | 5.3  | 94.82 | 163.29 | 353.7 | 4.84 |
| 2003/1/10  | 31.68 | 31.59 | 67750.17 | 43837.49 | 5.14 | 94.6  | 164.21 | 354.9 | 4.86 |
| 2003/1/13  | 32.26 | 32.08 | 67750.17 | 43837.49 | 5.25 | 95.13 | 164.18 | 355.1 | 4.83 |
| 2003/1/14  | 32.37 | 32.42 | 67750.17 | 43837.49 | 5.11 | 94.82 | 164.62 | 352.4 | 4.75 |
| 2003/1/15  | 33.21 | 33.23 | 67750.17 | 43837.49 | 5.43 | 94.91 | 164.59 | 351.1 | 4.77 |
| 2003/1/16  | 33.66 | 33.58 | 67750.17 | 43837.49 | 5.65 | 94.46 | 164.64 | 358.1 | 4.82 |
| 2003/1/17  | 33.91 | 33.88 | 67750.17 | 43837.49 | 5.54 | 94.35 | 163.73 | 356.8 | 4.8  |

|           |       |       |          |          |      |       |        |       |      |
|-----------|-------|-------|----------|----------|------|-------|--------|-------|------|
| 2003/1/21 | 34.61 | 34.62 | 67750.17 | 43837.49 | 5.43 | 94.22 | 164.68 | 357.5 | 4.81 |
| 2003/1/22 | 32.85 | 34.32 | 67750.17 | 43837.49 | 5.67 | 94.11 | 163.37 | 359.9 | 4.84 |
| 2003/1/23 | 32.25 | 33.9  | 67750.17 | 43837.49 | 5.46 | 93.85 | 163.1  | 364.7 | 4.78 |
| 2003/1/24 | 33.28 | 34.98 | 67750.17 | 43837.49 | 5.52 | 93.16 | 162.11 | 368.4 | 4.88 |
| 2003/1/27 | 32.29 | 32.43 | 67750.17 | 43837.49 | 5.4  | 93.05 | 161.68 | 369.4 | 4.83 |
| 2003/1/28 | 32.67 | 32.7  | 67750.17 | 43837.49 | 5.44 | 92.84 | 161.75 | 370   | 4.87 |
| 2003/1/29 | 33.63 | 33.54 | 67750.17 | 43837.49 | 5.66 | 92.44 | 160.49 | 366.3 | 4.8  |
| 2003/1/30 | 33.85 | 33.78 | 67750.17 | 43837.49 | 5.58 | 92.14 | 160.35 | 368.6 | 4.87 |
| 2003/1/31 | 33.51 | 33.51 | 67750.17 | 43837.49 | 5.61 | 92.44 | 157.6  | 368.3 | 4.86 |
| 2003/2/3  | 32.76 | 32.84 | 69368.13 | 45108.14 | 5.77 | 92.44 | 158.32 | 370.8 | 4.84 |
| 2003/2/4  | 33.58 | 33.61 | 69368.13 | 45108.14 | 5.76 | 92.01 | 158.22 | 379   | 4.92 |
| 2003/2/5  | 33.93 | 33.91 | 69368.13 | 45108.14 | 5.64 | 92.28 | 157.71 | 376.4 | 4.77 |
| 2003/2/6  | 34.16 | 34.36 | 69368.13 | 45108.14 | 5.83 | 92.65 | 158.77 | 370.1 | 4.68 |
| 2003/2/7  | 35.12 | 35.05 | 69368.13 | 45108.14 | 6.04 | 92.97 | 159.73 | 369.9 | 4.65 |
| 2003/2/10 | 34.48 | 34.46 | 69368.13 | 45108.14 | 5.85 | 93.18 | 159.85 | 363.7 | 4.6  |
| 2003/2/11 | 35.44 | 35.43 | 69368.13 | 45108.14 | 5.98 | 93.73 | 160.45 | 362.5 | 4.57 |
| 2003/2/12 | 35.77 | 35.83 | 69368.13 | 45108.14 | 5.79 | 93.87 | 161.64 | 352.6 | 4.51 |
| 2003/2/13 | 36.36 | 36.63 | 69368.13 | 45108.14 | 5.74 | 93.58 | 161.44 | 357.4 | 4.53 |
| 2003/2/14 | 36.8  | 36.61 | 69368.13 | 45108.14 | 5.85 | 94.12 | 161.74 | 351.9 | 4.54 |
| 2003/2/18 | 36.96 | 36.88 | 69368.13 | 45108.14 | 5.91 | 95.32 | 164.04 | 344.2 | 4.56 |
| 2003/2/19 | 37.16 | 37.02 | 69368.13 | 45108.14 | 6.13 | 94.94 | 164.83 | 349.9 | 4.63 |
| 2003/2/20 | 36.79 | 36.45 | 69368.13 | 45108.14 | 6.16 | 95.17 | 164.26 | 353.1 | 4.66 |
| 2003/2/21 | 35.58 | 36.76 | 69368.13 | 45108.14 | 6.61 | 96.05 | 165.04 | 351.8 | 4.67 |
| 2003/2/24 | 36.48 | 37.29 | 69368.13 | 45108.14 | 9.14 | 95.69 | 165.04 | 356.3 | 4.72 |
| 2003/2/25 | 36.06 | 36.06 | 69368.13 | 45108.14 | 9.58 | 96.35 | 165.46 | 352.3 | 4.64 |
| 2003/2/26 | 37.7  | 37.96 | 69368.13 | 45108.14 | 9.13 | 96.02 | 166.8  | 354   | 4.66 |
| 2003/2/27 | 37.2  | 36.83 | 69368.13 | 45108.14 | 7.49 | 95.98 | 165.81 | 346.2 | 4.56 |
| 2003/2/28 | 36.6  | 36.76 | 69368.13 | 45108.14 | 8.1  | 96.4  | 165.42 | 350.3 | 4.59 |
| 2003/3/3  | 35.88 | 36.1  | 69883.66 | 43108.48 | 7.16 | 95.9  | 165.9  | 349.3 | 4.66 |
| 2003/3/4  | 36.89 | 36.95 | 69883.66 | 43108.48 | 7.04 | 95.74 | 165.01 | 353.3 | 4.66 |
| 2003/3/5  | 36.69 | 36.86 | 69883.66 | 43108.48 | 7.02 | 94.46 | 164.23 | 353.2 | 4.62 |
| 2003/3/6  | 37    | 37.21 | 69883.66 | 43108.48 | 6.84 | 94.47 | 162.85 | 356.9 | 4.66 |
| 2003/3/7  | 37.78 | 37.76 | 69883.66 | 43108.48 | 6.99 | 94.55 | 162.86 | 350.9 | 4.68 |
| 2003/3/10 | 37.27 | 37.18 | 69883.66 | 43108.48 | 6.52 | 94.6  | 162.86 | 354.8 | 4.67 |
| 2003/3/11 | 36.72 | 36.81 | 69883.66 | 43108.48 | 5.94 | 94.27 | 163.7  | 350.6 | 4.68 |
| 2003/3/12 | 37.83 | 37.87 | 69883.66 | 43108.48 | 5.87 | 93.92 | 162.62 | 346.6 | 4.62 |
| 2003/3/13 | 36.01 | 36.05 | 69883.66 | 43108.48 | 5.36 | 94.54 | 163.65 | 336   | 4.53 |
| 2003/3/14 | 35.38 | 35.41 | 69883.66 | 43108.48 | 5.43 | 95.58 | 164.12 | 336.6 | 4.53 |
| 2003/3/17 | 34.93 | 34.92 | 69883.66 | 43108.48 | 5.51 | 96.38 | 165.31 | 337.2 | 4.44 |
| 2003/3/18 | 31.67 | 31.55 | 69883.66 | 43108.48 | 5.34 | 96.61 | 167.39 | 337.7 | 4.45 |
| 2003/3/19 | 29.88 | 30.01 | 69883.66 | 43108.48 | 5.28 | 96.93 | 167.84 | 336.2 | 4.41 |
| 2003/3/20 | 28.61 | 28.62 | 69883.66 | 43108.48 | 5.31 | 96.67 | 167.53 | 333   | 4.41 |
| 2003/3/21 | 26.91 | 27.18 | 69883.66 | 43108.48 | 5.13 | 96.83 | 167.87 | 326.1 | 4.35 |
| 2003/3/24 | 28.66 | 29.51 | 69883.66 | 43108.48 | 5.25 | 96.17 | 167.61 | 329.5 | 4.36 |
| 2003/3/25 | 27.97 | 33.42 | 69883.66 | 43108.48 | 5.08 | 96.31 | 166.48 | 328.3 | 4.39 |
| 2003/3/26 | 28.63 | 28.71 | 69883.66 | 43108.48 | 5.1  | 96.17 | 167    | 330.1 | 4.39 |
| 2003/3/27 | 30.37 | 30.31 | 69883.66 | 43108.48 | 5.15 | 96.79 | 166.56 | 328.4 | 4.39 |
| 2003/3/28 | 30.16 | 30.21 | 69883.66 | 43108.48 | 5.15 | 96    | 167.84 | 331.5 | 4.43 |
| 2003/3/31 | 31.04 | 31.14 | 69883.66 | 43108.48 | 5.06 | 95.8  | 165.28 | 335.9 | 4.47 |
| 2003/4/1  | 29.78 | 29.48 | 68809.99 | 42262.64 | 5.13 | 96.44 | 165.46 | 334.3 | 4.44 |
| 2003/4/2  | 28.56 | 28.55 | 68809.99 | 42262.64 | 5.07 | 97.14 | 165.96 | 329.6 | 4.4  |
| 2003/4/3  | 28.97 | 29.05 | 68809.99 | 42262.64 | 4.92 | 96.9  | 166.71 | 324.9 | 4.41 |
| 2003/4/4  | 28.62 | 28.41 | 68809.99 | 42262.64 | 4.94 | 97.46 | 166.69 | 325.3 | 4.42 |
| 2003/4/7  | 27.96 | 27.76 | 68809.99 | 42262.64 | 5.13 | 98.05 | 168.15 | 321.5 | 4.42 |

|           |       |       |          |          |      |       |        |       |      |
|-----------|-------|-------|----------|----------|------|-------|--------|-------|------|
| 2003/4/8  | 28    | 27.97 | 68809.99 | 42262.64 | 5.11 | 97.79 | 168.26 | 322.2 | 4.48 |
| 2003/4/9  | 28.85 | 28.93 | 68809.99 | 42262.64 | 5.2  | 97.3  | 168.19 | 325.6 | 4.48 |
| 2003/4/10 | 27.46 | 27.2  | 68809.99 | 42262.64 | 5.42 | 96.74 | 167.11 | 326.7 | 4.49 |
| 2003/4/11 | 28.14 | 28.28 | 68809.99 | 42262.64 | 5.41 | 96.83 | 166.33 | 327.9 | 4.49 |
| 2003/4/14 | 28.63 | 28.41 | 68809.99 | 42262.64 | 5.55 | 96.71 | 166.44 | 324.2 | 4.54 |
| 2003/4/15 | 29.29 | 29.46 | 68809.99 | 42262.64 | 5.65 | 96.83 | 166.84 | 324.9 | 4.52 |
| 2003/4/16 | 29.18 | 29.16 | 68809.99 | 42262.64 | 5.68 | 96.27 | 166.93 | 325.8 | 4.49 |
| 2003/4/17 | 30.55 | 30.1  | 68809.99 | 42262.64 | 5.71 | 96.83 | 165.94 | 327.2 | 4.47 |
| 2003/4/21 | 30.87 | 30.76 | 68809.99 | 42262.64 | 5.71 | 97.42 | 167.17 | 333.5 | 4.54 |
| 2003/4/22 | 29.91 | 29.92 | 68809.99 | 42262.64 | 5.65 | 96.47 | 168.21 | 334.4 | 4.6  |
| 2003/4/23 | 26.65 | 28.04 | 68809.99 | 42262.64 | 5.57 | 95.89 | 166.88 | 331.5 | 4.63 |
| 2003/4/24 | 26.64 | 27.52 | 68809.99 | 42262.64 | 5.47 | 95.47 | 165.51 | 334.8 | 4.65 |
| 2003/4/25 | 26.26 | 25.92 | 68809.99 | 42262.64 | 5.48 | 95.77 | 164.93 | 333.4 | 4.63 |
| 2003/4/28 | 25.49 | 25.25 | 68809.99 | 42262.64 | 5.12 | 95.73 | 164.72 | 334.5 | 4.58 |
| 2003/4/29 | 25.24 | 25.32 | 68809.99 | 42262.64 | 5.24 | 95.41 | 165.34 | 334   | 4.55 |
| 2003/4/30 | 25.8  | 26.09 | 68809.99 | 42262.64 | 5.39 | 95.15 | 163.61 | 339.4 | 4.64 |
| 2003/5/1  | 26.03 | 26.05 | 68772.78 | 41110.23 | 5.27 | 94.67 | 163.61 | 342.4 | 4.76 |
| 2003/5/2  | 25.67 | 25.74 | 68772.78 | 41110.23 | 5.26 | 95.02 | 163.61 | 341.3 | 4.78 |
| 2003/5/5  | 26.49 | 26.43 | 68772.78 | 41110.23 | 5.69 | 94.84 | 162.77 | 342.6 | 4.8  |
| 2003/5/6  | 25.72 | 25.65 | 68772.78 | 41110.23 | 5.57 | 94.26 | 162.36 | 342.8 | 4.79 |
| 2003/5/7  | 26.23 | 26.24 | 68772.78 | 41110.23 | 5.66 | 95.38 | 161.72 | 342.2 | 4.73 |
| 2003/5/8  | 26.98 | 26.94 | 68772.78 | 41110.23 | 5.77 | 95.21 | 163.33 | 348.7 | 4.79 |
| 2003/5/9  | 27.72 | 27.65 | 68772.78 | 41110.23 | 5.81 | 94.97 | 163.33 | 348.9 | 4.79 |
| 2003/5/12 | 27.35 | 27.34 | 68772.78 | 41110.23 | 5.98 | 94.68 | 162.74 | 351.9 | 4.86 |
| 2003/5/13 | 28.5  | 28.51 | 68772.78 | 41110.23 | 6.31 | 94.69 | 162.77 | 350.2 | 4.81 |
| 2003/5/14 | 29.17 | 29.21 | 68772.78 | 41110.23 | 6.31 | 94.18 | 162.86 | 352.5 | 4.86 |
| 2003/5/15 | 28.74 | 28.57 | 68772.78 | 41110.23 | 6.13 | 94    | 162.22 | 352.8 | 4.77 |
| 2003/5/16 | 29.14 | 29.07 | 68772.78 | 41110.23 | 6.12 | 93.8  | 162.19 | 354.9 | 4.78 |
| 2003/5/19 | 28.83 | 28.84 | 68772.78 | 41110.23 | 6.02 | 93.36 | 161.1  | 364.4 | 4.81 |
| 2003/5/20 | 29.28 | 29.29 | 68772.78 | 41110.23 | 6.06 | 92.87 | 160.88 | 366.5 | 4.76 |
| 2003/5/21 | 29.03 | 29.51 | 68772.78 | 41110.23 | 6.2  | 93.15 | 159.99 | 372.2 | 4.72 |
| 2003/5/22 | 28.85 | 29.09 | 68772.78 | 41110.23 | 6.04 | 93.12 | 161.1  | 368.1 | 4.65 |
| 2003/5/23 | 29.16 | 29.74 | 68772.78 | 41110.23 | 6.12 | 93.07 | 161.27 | 368.8 | 4.64 |
| 2003/5/27 | 29.35 | 29.24 | 68772.78 | 41110.23 | 5.9  | 92.91 | 161.22 | 367.8 | 4.62 |
| 2003/5/28 | 28.58 | 28.46 | 68772.78 | 41110.23 | 5.95 | 93.08 | 161.38 | 365.2 | 4.63 |
| 2003/5/29 | 29.1  | 29.15 | 68772.78 | 41110.23 | 6.07 | 92.25 | 161.82 | 369.6 | 4.58 |
| 2003/5/30 | 29.56 | 29.56 | 68772.78 | 41110.23 | 6.25 | 92.98 | 160.05 | 364.5 | 4.53 |
| 2003/6/2  | 30.71 | 30.72 | 67977.17 | 42275.51 | 6.41 | 92.77 | 160.85 | 366   | 4.51 |
| 2003/6/3  | 30.67 | 30.78 | 67977.17 | 42275.51 | 6.36 | 93.34 | 159.8  | 365.2 | 4.51 |
| 2003/6/4  | 30.05 | 29.81 | 67977.17 | 42275.51 | 6.38 | 93.06 | 160.55 | 362.6 | 4.5  |
| 2003/6/5  | 30.74 | 30.84 | 67977.17 | 42275.51 | 6.52 | 91.53 | 160.85 | 368.6 | 4.5  |
| 2003/6/6  | 31.28 | 31.26 | 67977.17 | 42275.51 | 6.51 | 91.48 | 158.12 | 363.7 | 4.55 |
| 2003/6/9  | 31.45 | 31.36 | 67977.17 | 42275.51 | 6.31 | 92.37 | 158.72 | 361.8 | 4.52 |
| 2003/6/10 | 31.73 | 31.72 | 67977.17 | 42275.51 | 6.33 | 92.03 | 159.57 | 352.2 | 4.47 |
| 2003/6/11 | 32.36 | 32.17 | 67977.17 | 42275.51 | 6.21 | 91.16 | 159.19 | 355.5 | 4.5  |
| 2003/6/12 | 31.51 | 31.41 | 67977.17 | 42275.51 | 5.61 | 91.12 | 159.19 | 353.3 | 4.51 |
| 2003/6/13 | 30.65 | 30.63 | 67977.17 | 42275.51 | 5.68 | 90.89 | 159.19 | 356.6 | 4.58 |
| 2003/6/16 | 31.18 | 31.14 | 67977.17 | 42275.51 | 5.71 | 90.57 | 157.66 | 359   | 4.61 |
| 2003/6/17 | 31.07 | 31.08 | 67977.17 | 42275.51 | 5.71 | 90.23 | 157.25 | 363.2 | 4.61 |
| 2003/6/18 | 30.36 | 30.28 | 67977.17 | 42275.51 | 5.58 | 90.53 | 157.23 | 357.2 | 4.56 |
| 2003/6/19 | 29.96 | 29.86 | 67977.17 | 42275.51 | 5.94 | 90.6  | 158.04 | 361.3 | 4.57 |
| 2003/6/20 | 30.82 | 30.63 | 67977.17 | 42275.51 | 5.81 | 91.54 | 157.55 | 356.3 | 4.53 |
| 2003/6/23 | 29.17 | 30.22 | 67977.17 | 42275.51 | 5.86 | 91.28 | 159.04 | 353   | 4.56 |
| 2003/6/24 | 28.78 | 30.05 | 67977.17 | 42275.51 | 5.7  | 91.34 | 158.91 | 346.3 | 4.52 |

|           |       |       |          |          |      |       |        |       |      |
|-----------|-------|-------|----------|----------|------|-------|--------|-------|------|
| 2003/6/25 | 29.95 | 31.65 | 67977.17 | 42275.51 | 5.76 | 91    | 159.33 | 349.3 | 4.57 |
| 2003/6/26 | 29.01 | 28.97 | 67977.17 | 42275.51 | 5.29 | 91.46 | 158.72 | 343.9 | 4.52 |
| 2003/6/27 | 29.27 | 29.18 | 67977.17 | 42275.51 | 5.36 | 92.3  | 159.61 | 345.5 | 4.51 |
| 2003/6/30 | 30.19 | 30.15 | 67977.17 | 42275.51 | 5.41 | 91.83 | 158.93 | 346.3 | 4.56 |
| 2003/7/1  | 30.4  | 30.41 | 68603.8  | 42191.46 | 5.32 | 91.17 | 158.84 | 351.7 | 4.57 |
| 2003/7/2  | 30.15 | 30.29 | 68603.8  | 42191.46 | 5.2  | 91.12 | 158.19 | 351.6 | 4.63 |
| 2003/7/3  | 30.42 | 30.39 | 68603.8  | 42191.46 | 5.23 | 90.82 | 158.27 | 351.3 | 4.68 |
| 2003/7/7  | 30.13 | 30.08 | 68603.8  | 42191.46 | 5.38 | 91.92 | 157.95 | 348.4 | 4.73 |
| 2003/7/8  | 30.22 | 30.32 | 68603.8  | 42191.46 | 5.5  | 92.8  | 159.3  | 344.4 | 4.74 |
| 2003/7/9  | 30.88 | 30.87 | 68603.8  | 42191.46 | 5.52 | 92.76 | 160.37 | 343.9 | 4.82 |
| 2003/7/10 | 31.06 | 31.04 | 68603.8  | 42191.46 | 5.26 | 92.68 | 160.68 | 344.6 | 4.81 |
| 2003/7/11 | 31.28 | 31.33 | 68603.8  | 42191.46 | 5.15 | 93.02 | 160.66 | 345.1 | 4.8  |
| 2003/7/14 | 31.27 | 31.2  | 68603.8  | 42191.46 | 5.1  | 93.76 | 160.6  | 347.8 | 4.79 |
| 2003/7/15 | 31.62 | 31.6  | 68603.8  | 42191.46 | 5.02 | 95.28 | 161.87 | 342.2 | 4.65 |
| 2003/7/16 | 31.05 | 31.2  | 68603.8  | 42191.46 | 4.93 | 95.05 | 164.24 | 343.2 | 4.66 |
| 2003/7/17 | 31.41 | 31.44 | 68603.8  | 42191.46 | 5.05 | 95.09 | 163.72 | 344.3 | 4.67 |
| 2003/7/18 | 31.96 | 31.96 | 68603.8  | 42191.46 | 5.02 | 95.35 | 164.26 | 347.3 | 4.72 |
| 2003/7/21 | 31.78 | 31.67 | 68603.8  | 42191.46 | 5.11 | 94.73 | 165.98 | 351   | 4.74 |
| 2003/7/22 | 30.19 | 30.2  | 68603.8  | 42191.46 | 4.87 | 94.95 | 164.78 | 350.7 | 4.78 |
| 2003/7/23 | 29.67 | 30.13 | 68603.8  | 42191.46 | 4.88 | 94.28 | 164.49 | 358.7 | 5.06 |
| 2003/7/24 | 30.22 | 30.72 | 68603.8  | 42191.46 | 4.73 | 93.91 | 163.19 | 362.3 | 5.11 |
| 2003/7/25 | 30.17 | 30.31 | 68603.8  | 42191.46 | 4.71 | 93.58 | 162.92 | 362.8 | 5.07 |
| 2003/7/28 | 30.11 | 29.98 | 68603.8  | 42191.46 | 4.7  | 93.24 | 162.9  | 364.9 | 5.19 |
| 2003/7/29 | 30.24 | 30.21 | 68603.8  | 42191.46 | 4.69 | 93.34 | 161.88 | 361.7 | 5.16 |
| 2003/7/30 | 30.68 | 30.69 | 68603.8  | 42191.46 | 4.67 | 93.73 | 162.33 | 356.2 | 5.06 |
| 2003/7/31 | 30.54 | 30.56 | 68603.8  | 42191.46 | 4.72 | 94.18 | 164.58 | 354   | 5.12 |
| 2003/8/1  | 32.31 | 32.23 | 69058.9  | 42128.38 | 4.87 | 94.3  | 165.03 | 346.1 | 5.1  |
| 2003/8/4  | 31.84 | 31.8  | 69058.9  | 42128.38 | 4.63 | 94.23 | 164.43 | 349.2 | 5.02 |
| 2003/8/5  | 32.22 | 32.34 | 69058.9  | 42128.38 | 4.68 | 94.26 | 164.65 | 349.6 | 4.94 |
| 2003/8/6  | 31.7  | 31.77 | 69058.9  | 42128.38 | 4.75 | 94.33 | 164.1  | 350.8 | 4.97 |
| 2003/8/7  | 32.39 | 32.41 | 69058.9  | 42128.38 | 5.08 | 93.73 | 164.99 | 352.5 | 5.04 |
| 2003/8/8  | 32.18 | 32.23 | 69058.9  | 42128.38 | 5.04 | 94.65 | 163.56 | 356.3 | 4.99 |
| 2003/8/11 | 32.01 | 31.91 | 69058.9  | 42128.38 | 5.13 | 94.33 | 165.26 | 361.7 | 5    |
| 2003/8/12 | 31.92 | 31.91 | 69058.9  | 42128.38 | 5.22 | 94.57 | 164.7  | 358.5 | 4.86 |
| 2003/8/13 | 30.78 | 30.85 | 69058.9  | 42128.38 | 5.18 | 94.4  | 165.47 | 362.1 | 5.03 |
| 2003/8/14 | 31.09 | 30.85 | 69058.9  | 42128.38 | 4.89 | 94.79 | 164.79 | 366   | 5.04 |
| 2003/8/15 | 31.05 | 31.01 | 69058.9  | 42128.38 | 4.85 | 94.98 | 165.37 | 363.2 | 4.93 |
| 2003/8/18 | 30.89 | 30.81 | 69058.9  | 42128.38 | 4.88 | 95.46 | 166.11 | 358.4 | 4.93 |
| 2003/8/19 | 30.7  | 30.76 | 69058.9  | 42128.38 | 4.96 | 95.46 | 167.02 | 361.6 | 5    |
| 2003/8/20 | 30.95 | 30.96 | 69058.9  | 42128.38 | 5.12 | 95.04 | 167.12 | 365.6 | 5.02 |
| 2003/8/21 | 31.88 | 31.78 | 69058.9  | 42128.38 | 5.28 | 96.2  | 166.54 | 360.6 | 4.95 |
| 2003/8/22 | 31.84 | 31.64 | 69058.9  | 42128.38 | 5.28 | 96.26 | 168.24 | 363.1 | 5    |
| 2003/8/25 | 31.56 | 31.43 | 69058.9  | 42128.38 | 5.08 | 96.5  | 168.48 | 361.3 | 4.99 |
| 2003/8/26 | 31.95 | 32.01 | 69058.9  | 42128.38 | 5.04 | 96.47 | 168.71 | 365.8 | 5    |
| 2003/8/27 | 31.21 | 31.18 | 69058.9  | 42128.38 | 4.93 | 96.46 | 168.34 | 373.5 | 5.13 |
| 2003/8/28 | 31.5  | 31.41 | 69058.9  | 42128.38 | 4.94 | 96.31 | 168.15 | 370.6 | 5.13 |
| 2003/8/29 | 31.57 | 31.76 | 69058.9  | 42128.38 | 4.73 | 96.26 | 167.03 | 375.8 | 5.11 |
| 2003/9/2  | 29.41 | 29.57 | 69660.75 | 42968.23 | 4.64 | 96.7  | 168.01 | 373.3 | 4.99 |
| 2003/9/3  | 29.49 | 29.43 | 69660.75 | 42968.23 | 4.69 | 96.58 | 167.77 | 374   | 5.06 |
| 2003/9/4  | 28.98 | 28.87 | 69660.75 | 42968.23 | 4.81 | 96.01 | 167.13 | 373   | 5.02 |
| 2003/9/5  | 28.88 | 28.93 | 69660.75 | 42968.23 | 4.77 | 95.48 | 165.38 | 377.7 | 5.13 |
| 2003/9/8  | 28.85 | 28.85 | 69660.75 | 42968.23 | 4.66 | 95.78 | 165.18 | 375.2 | 5.09 |
| 2003/9/9  | 29.18 | 29.22 | 69660.75 | 42968.23 | 4.73 | 95.48 | 165.5  | 381.8 | 5.25 |
| 2003/9/10 | 29.35 | 29.41 | 69660.75 | 42968.23 | 4.97 | 95.41 | 164.93 | 380.1 | 5.25 |

|            |       |       |          |          |      |       |        |       |      |
|------------|-------|-------|----------|----------|------|-------|--------|-------|------|
| 2003/9/11  | 28.82 | 28.86 | 69660.75 | 42968.23 | 4.74 | 95.19 | 164.68 | 379.8 | 5.33 |
| 2003/9/12  | 28.27 | 28.26 | 69660.75 | 42968.23 | 4.77 | 94.64 | 164.51 | 375.9 | 5.2  |
| 2003/9/15  | 28.14 | 28.15 | 69660.75 | 42968.23 | 4.69 | 94.75 | 163.28 | 374.6 | 5.19 |
| 2003/9/16  | 27.56 | 27.6  | 69660.75 | 42968.23 | 4.66 | 95.69 | 163.58 | 373.6 | 5.21 |
| 2003/9/17  | 27.03 | 27    | 69660.75 | 42968.23 | 4.64 | 94.3  | 165.02 | 376.3 | 5.28 |
| 2003/9/18  | 27.17 | 27.26 | 69660.75 | 42968.23 | 4.47 | 94    | 163.18 | 376.7 | 5.26 |
| 2003/9/19  | 27.03 | 26.93 | 69660.75 | 42968.23 | 4.48 | 92.93 | 162.86 | 381.9 | 5.28 |
| 2003/9/22  | 26.96 | 26.97 | 69660.75 | 42968.23 | 4.49 | 91.93 | 160.36 | 387.2 | 5.27 |
| 2003/9/23  | 27.13 | 27    | 69660.75 | 42968.23 | 4.51 | 91.82 | 160    | 385.9 | 5.24 |
| 2003/9/24  | 28.24 | 28.19 | 69660.75 | 42968.23 | 4.59 | 91.51 | 160.28 | 387.5 | 5.3  |
| 2003/9/25  | 28.29 | 28.29 | 69660.75 | 42968.23 | 4.54 | 91.49 | 159.25 | 385   | 5.21 |
| 2003/9/26  | 28.16 | 28.21 | 69660.75 | 42968.23 | 4.43 | 91.51 | 158.98 | 380.8 | 5.14 |
| 2003/9/29  | 28.4  | 28.35 | 69660.75 | 42968.23 | 4.9  | 91.13 | 158.41 | 382.4 | 5.08 |
| 2003/9/30  | 29.2  | 29.19 | 69660.75 | 42968.23 | 4.83 | 91.35 | 155.88 | 385.4 | 5.14 |
| 2003/10/1  | 29.39 | 29.43 | 70623.51 | 43160.19 | 4.68 | 91.29 | 156.91 | 384.3 | 5.11 |
| 2003/10/2  | 29.84 | 29.83 | 70623.51 | 43160.19 | 4.69 | 91.03 | 156.7  | 383.1 | 5.1  |
| 2003/10/3  | 30.4  | 30.37 | 70623.51 | 43160.19 | 4.77 | 91.44 | 156.87 | 369.4 | 4.84 |
| 2003/10/6  | 30.47 | 30.4  | 70623.51 | 43160.19 | 4.9  | 91.2  | 157.84 | 372.7 | 4.82 |
| 2003/10/7  | 30.41 | 30.48 | 70623.51 | 43160.19 | 5.14 | 91.5  | 156.77 | 377.2 | 4.88 |
| 2003/10/8  | 29.81 | 29.6  | 70623.51 | 43160.19 | 5.15 | 91.52 | 157.72 | 375.4 | 4.87 |
| 2003/10/9  | 31.01 | 30.97 | 70623.51 | 43160.19 | 5.49 | 91.36 | 158.2  | 369.2 | 4.84 |
| 2003/10/10 | 31.97 | 32.01 | 70623.51 | 43160.19 | 5.65 | 91.38 | 158.62 | 373.6 | 4.91 |
| 2003/10/13 | 31.95 | 31.91 | 70623.51 | 43160.19 | 5.55 | 91.46 | 159.87 | 375.2 | 4.98 |
| 2003/10/14 | 31.82 | 31.68 | 70623.51 | 43160.19 | 5.48 | 90.98 | 159.36 | 375.7 | 4.93 |
| 2003/10/15 | 31.77 | 31.74 | 70623.51 | 43160.19 | 5.43 | 91.24 | 158.29 | 372.6 | 4.95 |
| 2003/10/16 | 31.54 | 31.51 | 70623.51 | 43160.19 | 5.41 | 90.94 | 158.68 | 372.7 | 4.92 |
| 2003/10/17 | 30.68 | 30.61 | 70623.51 | 43160.19 | 5.04 | 90.66 | 158.59 | 371.8 | 4.94 |
| 2003/10/20 | 30.35 | 30.37 | 70623.51 | 43160.19 | 4.77 | 91.05 | 158.55 | 374   | 5.01 |
| 2003/10/21 | 30.18 | 30.19 | 70623.51 | 43160.19 | 4.88 | 90.88 | 159.4  | 381.7 | 5.07 |
| 2003/10/22 | 29.92 | 30    | 70623.51 | 43160.19 | 4.92 | 89.88 | 158.94 | 386.5 | 5.14 |
| 2003/10/23 | 30.3  | 30.31 | 70623.51 | 43160.19 | 4.91 | 89.64 | 157.48 | 384.7 | 5.17 |
| 2003/10/24 | 30.16 | 29.99 | 70623.51 | 43160.19 | 4.79 | 89.65 | 157.34 | 388.9 | 5.17 |
| 2003/10/27 | 29.92 | 29.95 | 70623.51 | 43160.19 | 4.51 | 89.83 | 156.46 | 387.9 | 5.19 |
| 2003/10/28 | 29.56 | 29.57 | 70623.51 | 43160.19 | 4.49 | 89.62 | 157.39 | 383.2 | 5.1  |
| 2003/10/29 | 28.91 | 28.95 | 70623.51 | 43160.19 | 4.46 | 89.62 | 157.14 | 386.8 | 5.14 |
| 2003/10/30 | 28.47 | 28.67 | 70623.51 | 43160.19 | 4.71 | 89.77 | 157.21 | 384.4 | 5.14 |
| 2003/10/31 | 29.11 | 29.24 | 70623.51 | 43160.19 | 4.89 | 89.79 | 155.38 | 384.6 | 5.07 |
| 2003/11/3  | 28.9  | 28.81 | 70860.66 | 42756.64 | 4.71 | 90.85 | 155.41 | 377.1 | 4.93 |
| 2003/11/4  | 28.75 | 28.86 | 70860.66 | 42756.64 | 4.73 | 90.48 | 157.8  | 380   | 5.03 |
| 2003/11/5  | 30.3  | 30.29 | 70860.66 | 42756.64 | 4.9  | 91.13 | 156.94 | 382.7 | 4.99 |
| 2003/11/6  | 30.26 | 30.25 | 70860.66 | 42756.64 | 4.66 | 91.35 | 157.75 | 380.7 | 4.96 |
| 2003/11/7  | 30.85 | 30.73 | 70860.66 | 42756.64 | 4.71 | 90.87 | 157.75 | 383.4 | 5.06 |
| 2003/11/10 | 30.88 | 31.01 | 70860.66 | 42756.64 | 4.71 | 91.11 | 158.02 | 386.7 | 5.09 |
| 2003/11/11 | 31.15 | 31.21 | 70860.66 | 42756.64 | 4.87 | 91.49 | 158.72 | 388.2 | 5.07 |
| 2003/11/12 | 31.33 | 31.37 | 70860.66 | 42756.64 | 4.74 | 90.98 | 158.32 | 395   | 5.34 |
| 2003/11/13 | 31.9  | 31.89 | 70860.66 | 42756.64 | 4.8  | 90.32 | 157.5  | 394.3 | 5.3  |
| 2003/11/14 | 32.37 | 32.31 | 70860.66 | 42756.64 | 5.11 | 90.32 | 156.65 | 398   | 5.42 |
| 2003/11/17 | 31.73 | 31.75 | 70860.66 | 42756.64 | 4.76 | 90.05 | 156.89 | 391.5 | 5.23 |
| 2003/11/18 | 33.28 | 33.16 | 70860.66 | 42756.64 | 4.87 | 89.46 | 156.34 | 397.6 | 5.37 |
| 2003/11/19 | 32.92 | 32.84 | 70860.66 | 42756.64 | 4.74 | 89.75 | 155.27 | 394.9 | 5.27 |
| 2003/11/20 | 32.86 | 32.87 | 70860.66 | 42756.64 | 4.9  | 89.37 | 155.78 | 393.7 | 5.26 |
| 2003/11/21 | 31.61 | 32.26 | 70860.66 | 42756.64 | 4.92 | 89.43 | 155.51 | 396   | 5.3  |
| 2003/11/24 | 29.74 | 29.99 | 70860.66 | 42756.64 | 4.93 | 89.79 | 155.57 | 391.5 | 5.25 |
| 2003/11/25 | 29.77 | 30.02 | 70860.66 | 42756.64 | 5.05 | 89.63 | 156.27 | 391.1 | 5.3  |



|            |       |       |          |          |      |       |        |       |      |
|------------|-------|-------|----------|----------|------|-------|--------|-------|------|
| 2003/11/26 | 30.41 | 30.33 | 70860.66 | 42756.64 | 4.93 | 89.05 | 155.88 | 396.8 | 5.36 |
| 2003/12/1  | 29.95 | 29.89 | 72127.32 | 45392.08 | 5.28 | 89.06 | 152.97 | 402.7 | 5.45 |
| 2003/12/2  | 30.78 | 30.74 | 72127.32 | 45392.08 | 5.58 | 88.49 | 153.48 | 403.7 | 5.5  |
| 2003/12/3  | 31.1  | 30.61 | 72127.32 | 45392.08 | 5.76 | 88.59 | 152.42 | 403.9 | 5.47 |
| 2003/12/4  | 31.26 | 31.24 | 72127.32 | 45392.08 | 6.34 | 88.93 | 152.87 | 403.3 | 5.45 |
| 2003/12/5  | 30.73 | 30.68 | 72127.32 | 45392.08 | 6.14 | 88.52 | 153.46 | 406.4 | 5.47 |
| 2003/12/8  | 32.1  | 32.08 | 72127.32 | 45392.08 | 6.9  | 88.29 | 153.31 | 406.6 | 5.54 |
| 2003/12/9  | 31.76 | 31.72 | 72127.32 | 45392.08 | 6.72 | 87.69 | 152.71 | 408.2 | 5.64 |
| 2003/12/10 | 31.88 | 31.92 | 72127.32 | 45392.08 | 6.71 | 87.86 | 152.29 | 406.2 | 5.6  |
| 2003/12/11 | 31.85 | 32.01 | 72127.32 | 45392.08 | 6.62 | 87.67 | 152.93 | 404.6 | 5.58 |
| 2003/12/12 | 33.04 | 33.06 | 72127.32 | 45392.08 | 7.22 | 87.72 | 152.93 | 409.4 | 5.62 |
| 2003/12/15 | 33.18 | 33.17 | 72127.32 | 45392.08 | 6.95 | 87.64 | 152.87 | 409.2 | 5.64 |
| 2003/12/16 | 32.89 | 32.94 | 72127.32 | 45392.08 | 6.75 | 87.25 | 153.07 | 407.7 | 5.63 |
| 2003/12/17 | 33.35 | 33.36 | 72127.32 | 45392.08 | 6.99 | 86.73 | 152.87 | 412   | 5.69 |
| 2003/12/18 | 33.71 | 33.72 | 72127.32 | 45392.08 | 7.12 | 86.44 | 151.63 | 410.4 | 5.71 |
| 2003/12/19 | 33.02 | 32.81 | 72127.32 | 45392.08 | 6.98 | 86.75 | 151.27 | 409.2 | 5.72 |
| 2003/12/22 | 31.87 | 31.71 | 72127.32 | 45392.08 | 6.32 | 86.83 | 151.51 | 410.6 | 5.71 |
| 2003/12/23 | 31.95 | 32.03 | 72127.32 | 45392.08 | 6.14 | 86.83 | 151.82 | 411   | 5.74 |
| 2003/12/24 | 32.86 | 32.99 | 72127.32 | 45392.08 | 6.39 | 86.27 | 151.76 | 412.3 | 5.78 |
| 2003/12/29 | 32.4  | 32.51 | 72127.32 | 45392.08 | 6.15 | 86.32 | 149.9  | 414.8 | 5.92 |
| 2003/12/30 | 32.79 | 33.01 | 72127.32 | 45392.08 | 6.6  | 86.18 | 149.83 | 417.2 | 5.98 |
| 2003/12/31 | 32.52 | 32.51 | 72127.32 | 45392.08 | 6.19 | 85.76 | 145.95 | 416.1 | 5.95 |
| 2004/1/5   | 33.78 | 33.71 | 71908.24 | 44513.81 | 6.83 | 83.83 | 144.73 | 424.8 | 6.23 |
| 2004/1/6   | 33.7  | 33.54 | 71908.24 | 44513.81 | 7.08 | 83.24 | 144.49 | 423.2 | 6.32 |
| 2004/1/7   | 33.62 | 33.57 | 71908.24 | 44513.81 | 6.88 | 83.4  | 144.49 | 422.3 | 6.25 |
| 2004/1/8   | 33.98 | 34.27 | 71908.24 | 44513.81 | 7.09 | 82.62 | 144.71 | 424.4 | 6.26 |
| 2004/1/9   | 34.31 | 34.38 | 71908.24 | 44513.81 | 7.29 | 82.04 | 144.19 | 426.8 | 6.49 |
| 2004/1/12  | 34.72 | 34.92 | 71908.24 | 44513.81 | 6.91 | 82.1  | 143.42 | 426.6 | 6.61 |
| 2004/1/13  | 34.43 | 34.26 | 71908.24 | 44513.81 | 6.33 | 82.03 | 143.45 | 424   | 6.59 |
| 2004/1/14  | 34.5  | 34.62 | 71908.24 | 44513.81 | 6.39 | 82.64 | 143.76 | 422   | 6.42 |
| 2004/1/15  | 33.44 | 33.61 | 71908.24 | 44513.81 | 5.85 | 83.08 | 144.83 | 408.7 | 6.21 |
| 2004/1/16  | 35.07 | 35.16 | 71908.24 | 44513.81 | 5.94 | 84.3  | 145.56 | 407   | 6.32 |
| 2004/1/20  | 36.2  | 36.21 | 71908.24 | 44513.81 | 6.29 | 83.23 | 148.89 | 412.9 | 6.32 |
| 2004/1/21  | 34.58 | 35.53 | 71908.24 | 44513.81 | 6.15 | 82.75 | 145.79 | 411.2 | 6.2  |
| 2004/1/22  | 34.93 | 35.12 | 71908.24 | 44513.81 | 5.83 | 82.11 | 145.49 | 410.1 | 6.34 |
| 2004/1/23  | 34.94 | 34.94 | 71908.24 | 44513.81 | 6.06 | 83    | 145.35 | 408   | 6.36 |
| 2004/1/26  | 34.47 | 34.41 | 71908.24 | 44513.81 | 5.73 | 83.57 | 147.49 | 406.7 | 6.31 |
| 2004/1/27  | 34.12 | 33.99 | 71908.24 | 44513.81 | 5.72 | 82.9  | 148.43 | 410.1 | 6.55 |
| 2004/1/28  | 33.62 | 33.63 | 71908.24 | 44513.81 | 5.78 | 83.47 | 147.15 | 414.6 | 6.63 |
| 2004/1/29  | 32.81 | 32.86 | 71908.24 | 44513.81 | 5.66 | 83.41 | 147.71 | 398.5 | 6.23 |
| 2004/1/30  | 33.05 | 33.16 | 71908.24 | 44513.81 | 5.4  | 83.07 | 148.05 | 402.2 | 6.25 |
| 2004/2/2   | 34.98 | 34.02 | 71883.68 | 45712.3  | 5.57 | 82.94 | 146.24 | 398.7 | 6.04 |
| 2004/2/3   | 34.1  | 34.2  | 71883.68 | 45712.3  | 5.65 | 82.19 | 145.24 | 399.2 | 6.12 |
| 2004/2/4   | 33.1  | 33.06 | 71883.68 | 45712.3  | 5.65 | 82.5  | 144.93 | 401   | 6.15 |
| 2004/2/5   | 33.08 | 33.26 | 71883.68 | 45712.3  | 5.4  | 82.4  | 145.72 | 398.1 | 6.12 |
| 2004/2/6   | 32.48 | 32.49 | 71883.68 | 45712.3  | 5.35 | 81.85 | 145.13 | 403.6 | 6.28 |
| 2004/2/9   | 32.83 | 32.91 | 71883.68 | 45712.3  | 5.35 | 81.24 | 143.81 | 406.8 | 6.43 |
| 2004/2/10  | 33.87 | 34.03 | 71883.68 | 45712.3  | 5.4  | 80.92 | 142.79 | 406.4 | 6.39 |
| 2004/2/11  | 34    | 33.93 | 71883.68 | 45712.3  | 5.26 | 79.85 | 142.7  | 410.2 | 6.56 |
| 2004/2/12  | 33.98 | 34.03 | 71883.68 | 45712.3  | 5.45 | 79.79 | 140.96 | 413.7 | 6.62 |
| 2004/2/13  | 34.56 | 34.51 | 71883.68 | 45712.3  | 5.54 | 80.19 | 140.74 | 410.3 | 6.58 |
| 2004/2/17  | 35.19 | 35.13 | 71883.68 | 45712.3  | 5.32 | 79.41 | 140.97 | 416   | 6.78 |
| 2004/2/18  | 35.45 | 35.42 | 71883.68 | 45712.3  | 5.36 | 80.09 | 139.69 | 412.3 | 6.7  |
| 2004/2/19  | 36    | 35.81 | 71883.68 | 45712.3  | 5.24 | 79.77 | 141.25 | 409.8 | 6.66 |

|           |       |       |          |          |      |       |        |       |      |
|-----------|-------|-------|----------|----------|------|-------|--------|-------|------|
| 2004/2/20 | 35.6  | 35.8  | 71883.68 | 45712.3  | 5.19 | 81.3  | 141.3  | 397.5 | 6.53 |
| 2004/2/23 | 34.35 | 35.75 | 71883.68 | 45712.3  | 5.13 | 80.89 | 141.3  | 399   | 6.49 |
| 2004/2/24 | 34.58 | 35.85 | 71883.68 | 45712.3  | 5.08 | 79.98 | 143.09 | 404.5 | 6.62 |
| 2004/2/25 | 35.68 | 37.28 | 71883.68 | 45712.3  | 5.15 | 80.77 | 140.94 | 395.8 | 6.54 |
| 2004/2/26 | 35.51 | 35.45 | 71883.68 | 45712.3  | 5.39 | 81.17 | 142.33 | 395.5 | 6.71 |
| 2004/2/27 | 36.16 | 36.08 | 71883.68 | 45712.3  | 5.42 | 80.91 | 143.25 | 396.8 | 6.7  |
| 2004/3/1  | 36.86 | 36.85 | 71812.53 | 44690.23 | 5.55 | 80.43 | 141.45 | 399.6 | 6.93 |
| 2004/3/2  | 36.66 | 36.6  | 71812.53 | 44690.23 | 5.57 | 81.74 | 142.06 | 393.8 | 6.71 |
| 2004/3/3  | 35.8  | 35.8  | 71812.53 | 44690.23 | 5.38 | 82.16 | 144.12 | 392.7 | 6.74 |
| 2004/3/4  | 36.64 | 36.81 | 71812.53 | 44690.23 | 5.46 | 82.58 | 144    | 393.2 | 6.76 |
| 2004/3/5  | 37.26 | 37.31 | 71812.53 | 44690.23 | 5.44 | 81.45 | 144.75 | 401.6 | 6.98 |
| 2004/3/8  | 36.57 | 36.53 | 71812.53 | 44690.23 | 5.39 | 81.3  | 144.75 | 400.9 | 6.97 |
| 2004/3/9  | 36.28 | 36.29 | 71812.53 | 44690.23 | 5.44 | 82.39 | 142.71 | 404.5 | 7.17 |
| 2004/3/10 | 36.1  | 36.21 | 71812.53 | 44690.23 | 5.4  | 83.41 | 145.07 | 400.3 | 7.17 |
| 2004/3/11 | 36.78 | 36.95 | 71812.53 | 44690.23 | 5.64 | 83.07 | 146.91 | 401   | 7.18 |
| 2004/3/12 | 36.19 | 36.21 | 71812.53 | 44690.23 | 5.6  | 83.46 | 147.52 | 395.6 | 7.05 |
| 2004/3/15 | 37.44 | 37.44 | 71812.53 | 44690.23 | 5.72 | 83.34 | 146.76 | 399.6 | 7.13 |
| 2004/3/16 | 37.48 | 37.36 | 71812.53 | 44690.23 | 5.69 | 82.98 | 146.45 | 402.6 | 7.16 |
| 2004/3/17 | 38.18 | 38.21 | 71812.53 | 44690.23 | 5.72 | 82.78 | 145.87 | 407.1 | 7.25 |
| 2004/3/18 | 37.93 | 37.81 | 71812.53 | 44690.23 | 5.63 | 81.91 | 145.22 | 411.3 | 7.45 |
| 2004/3/19 | 38.08 | 38.09 | 71812.53 | 44690.23 | 5.58 | 82.03 | 144.55 | 412.7 | 7.55 |
| 2004/3/22 | 37.11 | 37.12 | 71812.53 | 44690.23 | 5.55 | 82.05 | 144.52 | 417.6 | 7.62 |
| 2004/3/23 | 37.45 | 37.81 | 71812.53 | 44690.23 | 5.53 | 81.15 | 143.4  | 420   | 7.7  |
| 2004/3/24 | 37.01 | 37.06 | 71812.53 | 44690.23 | 5.43 | 82.45 | 143.56 | 417.4 | 7.64 |
| 2004/3/25 | 35.51 | 35.67 | 71812.53 | 44690.23 | 5.34 | 83.24 | 145.91 | 416.9 | 7.59 |
| 2004/3/26 | 35.73 | 35.61 | 71812.53 | 44690.23 | 5.4  | 82.81 | 147.16 | 422.2 | 7.71 |
| 2004/3/29 | 35.45 | 35.41 | 71812.53 | 44690.23 | 5.37 | 82.66 | 146.67 | 417.1 | 7.62 |
| 2004/3/30 | 36.25 | 36.15 | 71812.53 | 44690.23 | 5.75 | 82.32 | 145.45 | 421.7 | 7.78 |
| 2004/3/31 | 35.76 | 35.75 | 71812.53 | 44690.23 | 5.93 | 81.61 | 143.57 | 427.3 | 7.95 |
| 2004/4/1  | 34.27 | 34.47 | 71780.99 | 43789.29 | 5.77 | 81.04 | 143.25 | 427.8 | 8.15 |
| 2004/4/2  | 34.39 | 34.39 | 71780.99 | 43789.29 | 5.81 | 82.33 | 142.36 | 421.6 | 8.16 |
| 2004/4/5  | 34.38 | 34.29 | 71780.99 | 43789.29 | 5.8  | 82.52 | 144.12 | 415.4 | 8.12 |
| 2004/4/6  | 34.97 | 35.09 | 71780.99 | 43789.29 | 5.81 | 81.65 | 144.42 | 418.9 | 8.22 |
| 2004/4/7  | 36.15 | 36.28 | 71780.99 | 43789.29 | 5.87 | 81.84 | 143.36 | 422.8 | 8.19 |
| 2004/4/8  | 37.14 | 37.14 | 71780.99 | 43789.29 | 5.94 | 82.19 | 142.84 | 419.9 | 8.09 |
| 2004/4/12 | 37.84 | 37.79 | 71780.99 | 43789.29 | 6.01 | 81.9  | 143.57 | 420.1 | 8.03 |
| 2004/4/13 | 37.21 | 37.09 | 71780.99 | 43789.29 | 5.79 | 82.8  | 143.06 | 407   | 7.45 |
| 2004/4/14 | 36.72 | 36.62 | 71780.99 | 43789.29 | 5.74 | 84.06 | 145.02 | 399.8 | 7.01 |
| 2004/4/15 | 37.57 | 37.74 | 71780.99 | 43789.29 | 5.73 | 84    | 146.79 | 397.7 | 7.08 |
| 2004/4/16 | 37.74 | 37.7  | 71780.99 | 43789.29 | 5.61 | 83.8  | 146.53 | 401   | 7.15 |
| 2004/4/19 | 37.42 | 37.46 | 71780.99 | 43789.29 | 5.51 | 83.28 | 145.19 | 400.6 | 7.21 |
| 2004/4/20 | 37.6  | 37.61 | 71780.99 | 43789.29 | 5.55 | 84.35 | 145.15 | 397.7 | 6.95 |
| 2004/4/21 | 35.73 | 36.61 | 71780.99 | 43789.29 | 5.58 | 84.85 | 145.52 | 390.8 | 6.17 |
| 2004/4/22 | 36.71 | 37.7  | 71780.99 | 43789.29 | 5.62 | 84.78 | 146.28 | 393.3 | 6.03 |
| 2004/4/23 | 36.46 | 37.22 | 71780.99 | 43789.29 | 5.57 | 84.86 | 146.15 | 395.1 | 6.16 |
| 2004/4/26 | 36.97 | 37.02 | 71780.99 | 43789.29 | 5.76 | 84.28 | 146.2  | 396   | 6.17 |
| 2004/4/27 | 37.53 | 37.49 | 71780.99 | 43789.29 | 5.87 | 84    | 145.65 | 398.6 | 6.24 |
| 2004/4/28 | 37.46 | 37.23 | 71780.99 | 43789.29 | 5.94 | 84.99 | 145.49 | 385.4 | 5.87 |
| 2004/4/29 | 37.31 | 37.5  | 71780.99 | 43789.29 | 5.92 | 84.86 | 147.08 | 387.1 | 5.82 |
| 2004/4/30 | 37.38 | 37.31 | 71780.99 | 43789.29 | 5.86 | 84.61 | 145.52 | 387.5 | 6.08 |
| 2004/5/3  | 38.21 | 38.26 | 71415.97 | 42024.33 | 6.23 | 84.69 | 145.52 | 387.5 | 6.02 |
| 2004/5/4  | 38.98 | 38.86 | 71415.97 | 42024.33 | 6.27 | 83.7  | 145.52 | 391.8 | 6.04 |
| 2004/5/5  | 39.57 | 39.69 | 71415.97 | 42024.33 | 6.31 | 83.67 | 144.17 | 393.8 | 6.1  |
| 2004/5/6  | 39.37 | 39.41 | 71415.97 | 42024.33 | 6.22 | 83.6  | 144.28 | 388.4 | 5.82 |

|           |       |       |          |          |      |       |        |       |      |
|-----------|-------|-------|----------|----------|------|-------|--------|-------|------|
| 2004/5/7  | 39.93 | 39.98 | 71415.97 | 42024.33 | 6.29 | 83.91 | 144.14 | 379.1 | 5.59 |
| 2004/5/10 | 38.93 | 38.9  | 71415.97 | 42024.33 | 6.18 | 84.41 | 144.14 | 378.7 | 5.76 |
| 2004/5/11 | 40.06 | 40.3  | 71415.97 | 42024.33 | 6.39 | 85.39 | 145.17 | 377.2 | 5.51 |
| 2004/5/12 | 40.77 | 40.3  | 71415.97 | 42024.33 | 6.41 | 84.58 | 146.23 | 377.7 | 5.56 |
| 2004/5/13 | 41.08 | 40.94 | 71415.97 | 42024.33 | 6.48 | 85.14 | 145.56 | 374.9 | 5.61 |
| 2004/5/14 | 41.38 | 41.42 | 71415.97 | 42024.33 | 6.4  | 85.26 | 146.01 | 377.1 | 5.72 |
| 2004/5/17 | 41.55 | 41.53 | 71415.97 | 42024.33 | 6.42 | 84.86 | 145.78 | 379.6 | 5.67 |
| 2004/5/18 | 40.54 | 40.32 | 71415.97 | 42024.33 | 6.15 | 84.93 | 146.1  | 375.9 | 5.67 |
| 2004/5/19 | 41.5  | 41.61 | 71415.97 | 42024.33 | 6.46 | 84.1  | 145.47 | 383   | 5.92 |
| 2004/5/20 | 40.92 | 40.92 | 71415.97 | 42024.33 | 6.32 | 84.45 | 145.74 | 378.5 | 5.77 |
| 2004/5/21 | 39.93 | 39.83 | 71415.97 | 42024.33 | 6.35 | 83.86 | 144.75 | 384.9 | 5.86 |
| 2004/5/24 | 41.72 | 42.03 | 71415.97 | 42024.33 | 6.71 | 83.73 | 144.37 | 385.7 | 5.99 |
| 2004/5/25 | 41.14 | 41.45 | 71415.97 | 42024.33 | 6.68 | 82.86 | 143.43 | 388.4 | 6.08 |
| 2004/5/26 | 40.7  | 40.6  | 71415.97 | 42024.33 | 6.68 | 82.67 | 142.25 | 388.3 | 6.05 |
| 2004/5/27 | 39.44 | 39.25 | 71415.97 | 42024.33 | 6.57 | 81.67 | 141.27 | 394.9 | 6.2  |
| 2004/5/28 | 39.88 | 39.9  | 71415.97 | 42024.33 | 6.44 | 81.86 | 140.13 | 394   | 6.11 |
| 2004/6/1  | 42.33 | 42.33 | 72973.42 | 43988.92 | 6.68 | 81.29 | 139.05 | 394.6 | 6.06 |
| 2004/6/2  | 39.96 | 39.96 | 72973.42 | 43988.92 | 6.52 | 81.49 | 138.34 | 391.6 | 5.84 |
| 2004/6/3  | 39.28 | 39.29 | 72973.42 | 43988.92 | 6.36 | 81.31 | 139.16 | 388.1 | 5.74 |
| 2004/6/4  | 38.49 | 38.44 | 72973.42 | 43988.92 | 6.26 | 81.25 | 138.88 | 390.9 | 5.81 |
| 2004/6/7  | 38.66 | 38.72 | 72973.42 | 43988.92 | 6.21 | 81.25 | 138.41 | 393.7 | 5.9  |
| 2004/6/8  | 37.28 | 37.18 | 72973.42 | 43988.92 | 6.12 | 81.51 | 138.72 | 391   | 5.77 |
| 2004/6/9  | 37.54 | 37.6  | 72973.42 | 43988.92 | 6.08 | 81.76 | 139.15 | 384.5 | 5.63 |
| 2004/6/10 | 38.45 | 38.45 | 72973.42 | 43988.92 | 6.18 | 81.14 | 139.74 | 385.9 | 5.75 |
| 2004/6/14 | 37.59 | 37.58 | 72973.42 | 43988.92 | 6.24 | 82.51 | 139.6  | 383.6 | 5.66 |
| 2004/6/15 | 37.19 | 37.18 | 72973.42 | 43988.92 | 6.3  | 81.64 | 141.05 | 388.1 | 5.74 |
| 2004/6/16 | 37.32 | 37.33 | 72973.42 | 43988.92 | 6.49 | 81.83 | 139.45 | 384.6 | 5.73 |
| 2004/6/17 | 38.46 | 38.51 | 72973.42 | 43988.92 | 6.58 | 81.42 | 139.58 | 388.9 | 5.93 |
| 2004/6/18 | 38.75 | 38.68 | 72973.42 | 43988.92 | 6.52 | 81.3  | 139.73 | 395.1 | 5.98 |
| 2004/6/21 | 37.63 | 37.69 | 72973.42 | 43988.92 | 6.34 | 81.71 | 139.06 | 394   | 5.86 |
| 2004/6/22 | 38.11 | 38.11 | 72973.42 | 43988.92 | 6.41 | 82.2  | 139.92 | 395   | 5.87 |
| 2004/6/23 | 37.57 | 37.56 | 72973.42 | 43988.92 | 6.42 | 82.32 | 139.85 | 395   | 5.88 |
| 2004/6/24 | 37.93 | 37.81 | 72973.42 | 43988.92 | 6.54 | 81.9  | 140.86 | 403.1 | 6.18 |
| 2004/6/25 | 37.55 | 37.34 | 72973.42 | 43988.92 | 6.35 | 81.91 | 140.2  | 402.9 | 6.13 |
| 2004/6/28 | 36.24 | 36.25 | 72973.42 | 43988.92 | 6.14 | 81.72 | 139.87 | 401   | 5.9  |
| 2004/6/29 | 35.66 | 35.6  | 72973.42 | 43988.92 | 6.12 | 82.67 | 139.95 | 392.8 | 5.85 |
| 2004/6/30 | 37.05 | 36.92 | 72973.42 | 43988.92 | 6.16 | 82.46 | 139.97 | 393   | 5.78 |
| 2004/7/1  | 38.74 | 38.56 | 73514.84 | 44006.28 | 6.22 | 82.08 | 138.93 | 396.4 | 5.94 |
| 2004/7/2  | 38.39 | 38.37 | 73514.84 | 44006.28 | 6.15 | 81.48 | 138.8  | 398.7 | 6    |
| 2004/7/6  | 39.65 | 39.56 | 73514.84 | 44006.28 | 6.42 | 81.07 | 137.68 | 393   | 5.96 |
| 2004/7/7  | 39.08 | 39.18 | 73514.84 | 44006.28 | 6.37 | 80.51 | 136.49 | 402.7 | 6.11 |
| 2004/7/8  | 40.33 | 40.27 | 73514.84 | 44006.28 | 6.19 | 80.67 | 135.82 | 408.2 | 6.42 |
| 2004/7/9  | 39.96 | 39.9  | 73514.84 | 44006.28 | 6.14 | 80.41 | 135.87 | 407.9 | 6.46 |
| 2004/7/12 | 39.5  | 39.3  | 73514.84 | 44006.28 | 5.86 | 80.12 | 135.38 | 408.4 | 6.53 |
| 2004/7/13 | 39.44 | 39.55 | 73514.84 | 44006.28 | 5.91 | 80.42 | 135.69 | 402.3 | 6.38 |
| 2004/7/14 | 40.97 | 40.98 | 73514.84 | 44006.28 | 5.98 | 80.47 | 135.68 | 405.6 | 6.6  |
| 2004/7/15 | 40.77 | 40.7  | 73514.84 | 44006.28 | 5.85 | 80.63 | 136.11 | 404.4 | 6.65 |
| 2004/7/16 | 41.25 | 41.1  | 73514.84 | 44006.28 | 5.89 | 79.77 | 136.12 | 406.8 | 6.71 |
| 2004/7/19 | 41.64 | 41.55 | 73514.84 | 44006.28 | 5.82 | 79.96 | 134.6  | 405.8 | 6.59 |
| 2004/7/20 | 40.86 | 40.86 | 73514.84 | 44006.28 | 5.94 | 80.66 | 135.15 | 402.1 | 6.6  |
| 2004/7/21 | 40.58 | 40.63 | 73514.84 | 44006.28 | 5.93 | 81.05 | 136.09 | 397.3 | 6.4  |
| 2004/7/22 | 41.36 | 41.51 | 73514.84 | 44006.28 | 6.15 | 80.98 | 137.02 | 395.3 | 6.42 |
| 2004/7/23 | 41.71 | 41.82 | 73514.84 | 44006.28 | 6.13 | 81.58 | 136.88 | 390.5 | 6.33 |
| 2004/7/26 | 41.44 | 41.45 | 73514.84 | 44006.28 | 5.96 | 81.1  | 137.36 | 390.3 | 6.23 |

|            |       |       |          |          |      |       |        |       |      |
|------------|-------|-------|----------|----------|------|-------|--------|-------|------|
| 2004/7/27  | 41.84 | 41.83 | 73514.84 | 44006.28 | 6.02 | 81.97 | 136.97 | 387   | 6.24 |
| 2004/7/28  | 42.9  | 42.81 | 73514.84 | 44006.28 | 6.14 | 81.88 | 138.19 | 389   | 6.36 |
| 2004/7/29  | 42.75 | 42.69 | 73514.84 | 44006.28 | 6.18 | 82.22 | 137.82 | 387   | 6.36 |
| 2004/7/30  | 43.8  | 43.72 | 73514.84 | 44006.28 | 6.11 | 82.06 | 138.77 | 391   | 6.56 |
| 2004/8/2   | 43.82 | 43.83 | 72484.39 | 43933.97 | 5.81 | 81.98 | 137.73 | 391.7 | 6.62 |
| 2004/8/3   | 44.15 | 44.13 | 72484.39 | 43933.97 | 5.82 | 82.04 | 137.52 | 394   | 6.69 |
| 2004/8/4   | 42.83 | 42.73 | 72484.39 | 43933.97 | 5.66 | 82.01 | 137.76 | 392.2 | 6.74 |
| 2004/8/5   | 44.41 | 44.39 | 72484.39 | 43933.97 | 5.71 | 82.08 | 137.39 | 392.3 | 6.75 |
| 2004/8/6   | 43.95 | 43.95 | 72484.39 | 43933.97 | 5.59 | 81.3  | 137.42 | 399.8 | 6.78 |
| 2004/8/9   | 44.84 | 44.86 | 72484.39 | 43933.97 | 5.69 | 81.33 | 135.75 | 400.7 | 6.74 |
| 2004/8/10  | 44.52 | 44.51 | 72484.39 | 43933.97 | 5.79 | 81.94 | 135.8  | 400   | 6.72 |
| 2004/8/11  | 44.8  | 44.72 | 72484.39 | 43933.97 | 5.61 | 81.81 | 136.91 | 395.5 | 6.53 |
| 2004/8/12  | 45.5  | 45.52 | 72484.39 | 43933.97 | 5.44 | 82.1  | 136.53 | 394.3 | 6.56 |
| 2004/8/13  | 46.58 | 46.61 | 72484.39 | 43933.97 | 5.53 | 81.25 | 137.62 | 398.9 | 6.63 |
| 2004/8/16  | 46.05 | 46.02 | 72484.39 | 43933.97 | 5.38 | 81.33 | 136.02 | 402.9 | 6.74 |
| 2004/8/17  | 46.75 | 46.75 | 72484.39 | 43933.97 | 5.37 | 81.92 | 136.13 | 404.4 | 6.73 |
| 2004/8/18  | 47.27 | 47.36 | 72484.39 | 43933.97 | 5.38 | 82.13 | 136.93 | 404.3 | 6.84 |
| 2004/8/19  | 48.7  | 48.66 | 72484.39 | 43933.97 | 5.51 | 81.69 | 137.31 | 407.1 | 6.82 |
| 2004/8/20  | 47.86 | 47.6  | 72484.39 | 43933.97 | 5.55 | 82.34 | 136.7  | 413.2 | 6.87 |
| 2004/8/23  | 46.05 | 46    | 72484.39 | 43933.97 | 5.31 | 82.82 | 137.85 | 410.5 | 6.75 |
| 2004/8/24  | 45.21 | 45.68 | 72484.39 | 43933.97 | 5.34 | 83.5  | 138.57 | 403   | 6.58 |
| 2004/8/25  | 43.47 | 43.83 | 72484.39 | 43933.97 | 5.3  | 83.35 | 139.59 | 407.9 | 6.61 |
| 2004/8/26  | 43.1  | 43.06 | 72484.39 | 43933.97 | 5.19 | 83.35 | 139.49 | 407.4 | 6.68 |
| 2004/8/27  | 43.18 | 43.11 | 72484.39 | 43933.97 | 5.08 | 83.65 | 138.95 | 403.3 | 6.59 |
| 2004/8/30  | 42.28 | 42.32 | 72484.39 | 43933.97 | 5.23 | 83.35 | 139.88 | 408.4 | 6.71 |
| 2004/8/31  | 42.12 | 42.23 | 72484.39 | 43933.97 | 5.07 | 83.05 | 138.68 | 410.9 | 6.77 |
| 2004/9/1   | 44    | 43.89 | 73112.26 | 44299.58 | 4.97 | 83.42 | 138.69 | 409.3 | 6.79 |
| 2004/9/2   | 44.06 | 44.04 | 73112.26 | 44299.58 | 4.77 | 83.49 | 139.3  | 406.5 | 6.77 |
| 2004/9/3   | 43.99 | 43.94 | 73112.26 | 44299.58 | 4.68 | 84.13 | 139.54 | 401   | 6.55 |
| 2004/9/7   | 43.31 | 43.18 | 73112.26 | 44299.58 | 4.79 | 84.33 | 139.99 | 397.9 | 6.2  |
| 2004/9/8   | 42.77 | 42.77 | 73112.26 | 44299.58 | 4.63 | 83.75 | 140.88 | 399.9 | 6.18 |
| 2004/9/9   | 44.61 | 44.53 | 73112.26 | 44299.58 | 4.66 | 83.56 | 139.74 | 398.9 | 6.15 |
| 2004/9/10  | 42.81 | 42.84 | 73112.26 | 44299.58 | 4.57 | 83.26 | 139.67 | 402.3 | 6.13 |
| 2004/9/13  | 43.87 | 43.86 | 73112.26 | 44299.58 | 4.85 | 83.22 | 139.12 | 404.5 | 6.18 |
| 2004/9/14  | 44.39 | 44.62 | 73112.26 | 44299.58 | 4.93 | 83.21 | 138.85 | 406   | 6.2  |
| 2004/9/15  | 43.58 | 43.83 | 73112.26 | 44299.58 | 4.82 | 84.19 | 139.31 | 405.3 | 6.27 |
| 2004/9/16  | 43.88 | 44.03 | 73112.26 | 44299.58 | 4.72 | 83.42 | 140.4  | 405   | 6.29 |
| 2004/9/17  | 45.59 | 45.63 | 73112.26 | 44299.58 | 5.11 | 83.42 | 139.09 | 406.1 | 6.26 |
| 2004/9/20  | 46.35 | 46.33 | 73112.26 | 44299.58 | 5.25 | 83.72 | 139.52 | 405.5 | 6.25 |
| 2004/9/21  | 47.1  | 47.11 | 73112.26 | 44299.58 | 5.61 | 83.25 | 139.89 | 408.5 | 6.35 |
| 2004/9/22  | 48.35 | 48.41 | 73112.26 | 44299.58 | 5.63 | 83.39 | 139.06 | 407.4 | 6.35 |
| 2004/9/23  | 48.46 | 48.37 | 73112.26 | 44299.58 | 5.56 | 83.26 | 139.26 | 411   | 6.45 |
| 2004/9/24  | 48.88 | 48.86 | 73112.26 | 44299.58 | 5.39 | 82.89 | 139.04 | 408.1 | 6.41 |
| 2004/9/27  | 49.64 | 49.56 | 73112.26 | 44299.58 | 5.26 | 82.66 | 138.25 | 409.1 | 6.53 |
| 2004/9/28  | 49.9  | 49.76 | 73112.26 | 44299.58 | 5.72 | 82.49 | 138.09 | 412.5 | 6.59 |
| 2004/9/29  | 49.51 | 49.53 | 73112.26 | 44299.58 | 6.91 | 83.12 | 138.04 | 413   | 6.7  |
| 2004/9/30  | 49.64 | 49.56 | 73112.26 | 44299.58 | 6.8  | 82.53 | 137.58 | 418.7 | 6.94 |
| 2004/10/1  | 50.12 | 50.16 | 73726.3  | 44102.28 | 6.77 | 82.96 | 136.68 | 419.5 | 6.94 |
| 2004/10/4  | 49.91 | 49.85 | 73726.3  | 44102.28 | 6.73 | 83.61 | 137.89 | 414   | 6.77 |
| 2004/10/5  | 51.09 | 51.08 | 73726.3  | 44102.28 | 7.16 | 83.67 | 138.53 | 418.2 | 7.1  |
| 2004/10/6  | 52.02 | 51.98 | 73726.3  | 44102.28 | 7.05 | 83.84 | 138.83 | 418.4 | 7.25 |
| 2004/10/7  | 52.67 | 52.56 | 73726.3  | 44102.28 | 7.26 | 83.7  | 138.95 | 418   | 7.22 |
| 2004/10/8  | 53.31 | 53.4  | 73726.3  | 44102.28 | 7.16 | 83.2  | 138.62 | 423.1 | 7.3  |
| 2004/10/11 | 53.64 | 53.65 | 73726.3  | 44102.28 | 6.99 | 82.93 | 139.15 | 422   | 7.25 |

|            |       |       |          |          |      |       |        |       |      |
|------------|-------|-------|----------|----------|------|-------|--------|-------|------|
| 2004/10/12 | 52.51 | 53.49 | 73726.3  | 44102.28 | 6.64 | 83.29 | 138.65 | 415.1 | 7.06 |
| 2004/10/13 | 53.64 | 53.86 | 73726.3  | 44102.28 | 6.85 | 83.2  | 138.67 | 413.2 | 6.9  |
| 2004/10/14 | 54.76 | 54.69 | 73726.3  | 44102.28 | 6.8  | 83.04 | 138.39 | 418.1 | 7.06 |
| 2004/10/15 | 54.93 | 54.89 | 73726.3  | 44102.28 | 6.71 | 82.71 | 138.23 | 418.7 | 7.11 |
| 2004/10/18 | 53.67 | 53.59 | 73726.3  | 44102.28 | 6.81 | 82.99 | 137.8  | 416.2 | 6.99 |
| 2004/10/19 | 53.29 | 53.28 | 73726.3  | 44102.28 | 7.12 | 82.71 | 138.41 | 420.3 | 7.2  |
| 2004/10/20 | 54.92 | 54.93 | 73726.3  | 44102.28 | 7.62 | 82.11 | 137.84 | 423.5 | 7.35 |
| 2004/10/21 | 54.47 | 54.51 | 73726.3  | 44102.28 | 7.7  | 81.63 | 136.66 | 424.4 | 7.31 |
| 2004/10/22 | 55.17 | 55.83 | 73726.3  | 44102.28 | 8.11 | 81.73 | 136.2  | 424.6 | 7.33 |
| 2004/10/25 | 54.54 | 55.52 | 73726.3  | 44102.28 | 7.89 | 80.99 | 136.39 | 429   | 7.38 |
| 2004/10/26 | 55.17 | 56.37 | 73726.3  | 44102.28 | 8.4  | 81.28 | 136.63 | 426.8 | 7.34 |
| 2004/10/27 | 52.46 | 52.52 | 73726.3  | 44102.28 | 7.63 | 81.65 | 136.82 | 424.8 | 7.2  |
| 2004/10/28 | 50.92 | 50.95 | 73726.3  | 44102.28 | 8.68 | 81.54 | 137.26 | 426.1 | 7.19 |
| 2004/10/29 | 51.76 | 51.78 | 73726.3  | 44102.28 | 8.73 | 81.21 | 137.43 | 429.4 | 7.31 |
| 2004/11/1  | 50.13 | 50.1  | 73419.8  | 45062.55 | 8.72 | 81.4  | 135.68 | 428.2 | 7.33 |
| 2004/11/2  | 49.62 | 49.6  | 73419.8  | 45062.55 | 8.57 | 81.1  | 135.94 | 420.8 | 7.02 |
| 2004/11/3  | 50.88 | 50.9  | 73419.8  | 45062.55 | 8.75 | 80.72 | 135.43 | 425.4 | 7.16 |
| 2004/11/4  | 48.82 | 48.8  | 73419.8  | 45062.55 | 8.2  | 80.96 | 134.75 | 430.8 | 7.38 |
| 2004/11/5  | 49.61 | 49.65 | 73419.8  | 45062.55 | 7.95 | 80.52 | 135.46 | 434.3 | 7.51 |
| 2004/11/8  | 49.09 | 49.1  | 73419.8  | 45062.55 | 7.6  | 80.42 | 135.46 | 433.4 | 7.49 |
| 2004/11/9  | 47.37 | 47.4  | 73419.8  | 45062.55 | 7.47 | 80.37 | 134.68 | 436.2 | 7.54 |
| 2004/11/10 | 48.86 | 48.7  | 73419.8  | 45062.55 | 7.68 | 80.84 | 134.61 | 434.5 | 7.42 |
| 2004/11/11 | 47.42 | 47.5  | 73419.8  | 45062.55 | 7.24 | 81.06 | 135.2  | 435.4 | 7.48 |
| 2004/11/12 | 47.32 | 47.3  | 73419.8  | 45062.55 | 7.18 | 80.33 | 135.29 | 438.3 | 7.62 |
| 2004/11/15 | 46.87 | 46.95 | 73419.8  | 45062.55 | 7.44 | 80.84 | 134.55 | 437.3 | 7.57 |
| 2004/11/16 | 46.11 | 46.1  | 73419.8  | 45062.55 | 7.12 | 80.58 | 135.17 | 440.5 | 7.59 |
| 2004/11/17 | 46.84 | 46.85 | 73419.8  | 45062.55 | 7.28 | 80.28 | 134.71 | 445.1 | 7.67 |
| 2004/11/18 | 46.22 | 46.3  | 73419.8  | 45062.55 | 6.87 | 80.72 | 134.88 | 442.9 | 7.55 |
| 2004/11/19 | 48.44 | 48.9  | 73419.8  | 45062.55 | 7.12 | 80.43 | 135.62 | 447   | 7.6  |
| 2004/11/22 | 48.64 | 48.48 | 73419.8  | 45062.55 | 6.76 | 80.27 | 135.26 | 449   | 7.57 |
| 2004/11/23 | 48.94 | 48.74 | 73419.8  | 45062.55 | 6.79 | 79.9  | 135.32 | 447.9 | 7.56 |
| 2004/11/24 | 49.44 | 49.14 | 73419.8  | 45062.55 | 7.98 | 79.35 | 134.83 | 449.3 | 7.61 |
| 2004/11/29 | 49.76 | 49.71 | 73419.8  | 45062.55 | 7.84 | 78.87 | 134.15 | 453.7 | 7.77 |
| 2004/11/30 | 49.13 | 49.16 | 73419.8  | 45062.55 | 7.62 | 78.17 | 133.73 | 451.3 | 7.72 |
| 2004/12/1  | 45.49 | 45.56 | 73093.08 | 46804.77 | 7.41 | 77.86 | 132.78 | 454   | 8.03 |
| 2004/12/2  | 43.25 | 43.31 | 73093.08 | 46804.77 | 6.81 | 78.27 | 131.43 | 450.4 | 7.91 |
| 2004/12/3  | 42.54 | 42.56 | 73093.08 | 46804.77 | 6.8  | 77.57 | 132.74 | 456   | 8    |
| 2004/12/6  | 42.98 | 42.96 | 73093.08 | 46804.77 | 6.92 | 77.69 | 131.69 | 454.2 | 7.92 |
| 2004/12/7  | 41.46 | 41.51 | 73093.08 | 46804.77 | 6.62 | 77.42 | 131.12 | 452   | 7.84 |
| 2004/12/8  | 41.94 | 41.96 | 73093.08 | 46804.77 | 6.68 | 77.86 | 131.5  | 437.2 | 7.1  |
| 2004/12/9  | 42.53 | 42.41 | 73093.08 | 46804.77 | 6.89 | 78.22 | 131.91 | 435.8 | 6.76 |
| 2004/12/10 | 40.71 | 40.71 | 73093.08 | 46804.77 | 6.84 | 78.59 | 132.07 | 433.9 | 6.71 |
| 2004/12/13 | 41.01 | 41.06 | 73093.08 | 46804.77 | 7.17 | 78.23 | 132.07 | 438.9 | 6.79 |
| 2004/12/14 | 41.82 | 41.76 | 73093.08 | 46804.77 | 7.33 | 78.11 | 132.29 | 435.9 | 6.72 |
| 2004/12/15 | 44.19 | 44.21 | 73093.08 | 46804.77 | 7.24 | 77.52 | 132.18 | 440.8 | 6.84 |
| 2004/12/16 | 44.18 | 44.16 | 73093.08 | 46804.77 | 7    | 77.97 | 131.67 | 436.9 | 6.69 |
| 2004/12/17 | 46.28 | 46.31 | 73093.08 | 46804.77 | 7.46 | 77.68 | 132.27 | 441.6 | 6.77 |
| 2004/12/20 | 45.64 | 45.57 | 73093.08 | 46804.77 | 6.95 | 77.4  | 131.41 | 442.4 | 6.83 |
| 2004/12/21 | 45.76 | 45.76 | 73093.08 | 46804.77 | 6.86 | 78.14 | 131.24 | 441.8 | 6.9  |
| 2004/12/22 | 44.24 | 44.05 | 73093.08 | 46804.77 | 6.82 | 78.58 | 132.75 | 440.3 | 6.8  |
| 2004/12/23 | 44.18 | 42.19 | 73093.08 | 46804.77 | 6.67 | 78.3  | 133.35 | 441.9 | 6.88 |
| 2004/12/27 | 41.32 | 41.26 | 73093.08 | 46804.77 | 6.16 | 77.86 | 133.14 | 445.2 | 6.97 |
| 2004/12/28 | 41.77 | 41.78 | 73093.08 | 46804.77 | 6.21 | 78.12 | 132.43 | 444.3 | 7.03 |
| 2004/12/29 | 43.64 | 43.69 | 73093.08 | 46804.77 | 6.4  | 78.53 | 132.83 | 437   | 6.8  |

|            |       |       |          |          |      |       |        |       |      |
|------------|-------|-------|----------|----------|------|-------|--------|-------|------|
| 2004/12/30 | 43.45 | 43.36 | 73093.08 | 46804.77 | 6.15 | 78.2  | 133.63 | 438.4 | 6.81 |
| 2005/1/3   | 42.12 | 42.16 | 73353.77 | 44508.73 | 5.79 | 78.52 | 129.04 | 429.7 | 6.48 |
| 2005/1/4   | 43.91 | 43.96 | 73353.77 | 44508.73 | 5.9  | 79.39 | 129.04 | 429.2 | 6.43 |
| 2005/1/5   | 43.39 | 43.41 | 73353.77 | 44508.73 | 5.83 | 79.42 | 129.04 | 427.3 | 6.51 |
| 2005/1/6   | 45.56 | 45.51 | 73353.77 | 44508.73 | 6.05 | 79.72 | 129.04 | 421.6 | 6.43 |
| 2005/1/7   | 45.43 | 45.32 | 73353.77 | 44508.73 | 6    | 79.9  | 129.04 | 419.5 | 6.43 |
| 2005/1/10  | 45.33 | 45.31 | 73353.77 | 44508.73 | 6.16 | 79.72 | 129.04 | 419.7 | 6.43 |
| 2005/1/11  | 45.68 | 45.66 | 73353.77 | 44508.73 | 6.1  | 79.6  | 131.28 | 422.4 | 6.62 |
| 2005/1/12  | 46.37 | 46.46 | 73353.77 | 44508.73 | 5.94 | 79.09 | 131.82 | 426.6 | 6.73 |
| 2005/1/13  | 48.04 | 48.11 | 73353.77 | 44508.73 | 6.45 | 79.44 | 130.93 | 425.1 | 6.73 |
| 2005/1/14  | 48.38 | 48.41 | 73353.77 | 44508.73 | 6.4  | 79.94 | 131.88 | 423   | 6.58 |
| 2005/1/18  | 48.38 | 48.46 | 73353.77 | 44508.73 | 6.14 | 80.09 | 132.1  | 423.5 | 6.64 |
| 2005/1/19  | 47.55 | 47.61 | 73353.77 | 44508.73 | 6.29 | 79.92 | 131.45 | 423.3 | 6.61 |
| 2005/1/20  | 46.91 | 47.01 | 73353.77 | 44508.73 | 6.31 | 79.88 | 130.9  | 422.6 | 6.54 |
| 2005/1/21  | 48.53 | 48.31 | 73353.77 | 44508.73 | 6.24 | 79.63 | 131.22 | 426.9 | 6.8  |
| 2005/1/24  | 48.81 | 48.61 | 73353.77 | 44508.73 | 6.48 | 79.53 | 131.17 | 427.1 | 6.85 |
| 2005/1/25  | 49.64 | 49.43 | 73353.77 | 44508.73 | 6.4  | 80.21 | 131.45 | 422.1 | 6.67 |
| 2005/1/26  | 48.78 | 48.8  | 73353.77 | 44508.73 | 6.39 | 79.39 | 131.44 | 426.9 | 6.79 |
| 2005/1/27  | 48.84 | 48.8  | 73353.77 | 44508.73 | 6.29 | 79.14 | 130.83 | 426.3 | 6.81 |
| 2005/1/28  | 47.18 | 47.15 | 73353.77 | 44508.73 | 6.26 | 79.18 | 130.28 | 425.8 | 6.8  |
| 2005/1/31  | 48.2  | 48.25 | 73353.77 | 44508.73 | 6.32 | 79.41 | 129.06 | 421.8 | 6.75 |
| 2005/2/1   | 47.12 | 47.1  | 73662.45 | 46518.88 | 6.32 | 79.11 | 129.92 | 420.8 | 6.73 |
| 2005/2/2   | 46.69 | 46.65 | 73662.45 | 46518.88 | 6.38 | 79    | 129.73 | 421.1 | 6.75 |
| 2005/2/3   | 46.45 | 46.4  | 73662.45 | 46518.88 | 6.15 | 79.22 | 129.53 | 416.6 | 6.68 |
| 2005/2/4   | 46.48 | 46.45 | 73662.45 | 46518.88 | 6.1  | 79.5  | 129.9  | 414   | 6.64 |
| 2005/2/7   | 45.28 | 45.35 | 73662.45 | 46518.88 | 5.97 | 80.18 | 129.89 | 413.6 | 6.56 |
| 2005/2/8   | 45.4  | 45.4  | 73662.45 | 46518.88 | 6.16 | 80.34 | 130.66 | 412.6 | 6.56 |
| 2005/2/9   | 45.46 | 45.45 | 73662.45 | 46518.88 | 6.17 | 80.2  | 130.82 | 412.9 | 6.59 |
| 2005/2/10  | 47.1  | 47.05 | 73662.45 | 46518.88 | 6.16 | 79.76 | 130.78 | 417.2 | 6.97 |
| 2005/2/11  | 47.16 | 47.15 | 73662.45 | 46518.88 | 6.09 | 79.81 | 130.39 | 420.5 | 7.21 |
| 2005/2/14  | 47.44 | 47.5  | 73662.45 | 46518.88 | 6.09 | 78.92 | 130.02 | 425.8 | 7.34 |
| 2005/2/15  | 47.26 | 47.3  | 73662.45 | 46518.88 | 6.18 | 78.63 | 129.24 | 425.9 | 7.36 |
| 2005/2/16  | 48.33 | 48.35 | 73662.45 | 46518.88 | 6.11 | 79.08 | 129.02 | 425.5 | 7.26 |
| 2005/2/17  | 47.54 | 47.5  | 73662.45 | 46518.88 | 5.92 | 78.65 | 129.45 | 427.3 | 7.37 |
| 2005/2/18  | 48.35 | 48.45 | 73662.45 | 46518.88 | 5.91 | 78.69 | 129.25 | 427.1 | 7.39 |
| 2005/2/22  | 51.15 | 51    | 73662.45 | 46518.88 | 6.1  | 77.96 | 128.76 | 434.5 | 7.52 |
| 2005/2/23  | 51.17 | 51.73 | 73662.45 | 46518.88 | 6.31 | 78.12 | 128.76 | 434.9 | 7.44 |
| 2005/2/24  | 51.39 | 52.05 | 73662.45 | 46518.88 | 6.3  | 78.05 | 128.99 | 434.5 | 7.38 |
| 2005/2/25  | 51.49 | 52.2  | 73662.45 | 46518.88 | 6.72 | 77.66 | 128.95 | 436.1 | 7.29 |
| 2005/2/28  | 51.75 | 51.75 | 73662.45 | 46518.88 | 6.73 | 77.58 | 127.19 | 437.6 | 7.36 |
| 2005/3/1   | 51.68 | 51.67 | 73961.18 | 46232.38 | 6.68 | 77.26 | 127.37 | 433.9 | 7.23 |
| 2005/3/2   | 53.05 | 53    | 73961.18 | 46232.38 | 6.72 | 77.58 | 127.5  | 433.8 | 7.31 |
| 2005/3/3   | 53.57 | 53.6  | 73961.18 | 46232.38 | 6.66 | 77.86 | 127.82 | 430.8 | 7.23 |
| 2005/3/4   | 53.78 | 53.7  | 73961.18 | 46232.38 | 6.74 | 77.21 | 127.97 | 435.1 | 7.35 |
| 2005/3/7   | 53.89 | 53.9  | 73961.18 | 46232.38 | 6.71 | 77.55 | 127.97 | 435.8 | 7.36 |
| 2005/3/8   | 54.59 | 54.55 | 73961.18 | 46232.38 | 6.85 | 76.97 | 127.97 | 441.1 | 7.5  |
| 2005/3/9   | 54.77 | 54.75 | 73961.18 | 46232.38 | 6.88 | 77.12 | 127.46 | 442.9 | 7.6  |
| 2005/3/10  | 53.54 | 53.52 | 73961.18 | 46232.38 | 6.77 | 77.21 | 127.83 | 443.4 | 7.49 |
| 2005/3/11  | 54.43 | 54.4  | 73961.18 | 46232.38 | 6.77 | 77.08 | 128.2  | 446.8 | 7.54 |
| 2005/3/14  | 54.95 | 54.9  | 73961.18 | 46232.38 | 7.14 | 77.59 | 128.2  | 441.6 | 7.38 |
| 2005/3/15  | 55.05 | 55.05 | 73961.18 | 46232.38 | 7.18 | 77.61 | 128.74 | 441.4 | 7.38 |
| 2005/3/16  | 56.46 | 56.5  | 73961.18 | 46232.38 | 7.19 | 77.08 | 128.49 | 444.2 | 7.43 |
| 2005/3/17  | 56.4  | 56.4  | 73961.18 | 46232.38 | 7.24 | 77.13 | 128.13 | 439.1 | 7.39 |
| 2005/3/18  | 56.72 | 56.8  | 73961.18 | 46232.38 | 7.27 | 77.25 | 128.32 | 439.7 | 7.38 |

|           |       |       |          |          |      |       |        |       |      |
|-----------|-------|-------|----------|----------|------|-------|--------|-------|------|
| 2005/3/21 | 56.62 | 56.7  | 73961.18 | 46232.38 | 7.32 | 78.29 | 128.34 | 431.4 | 7.1  |
| 2005/3/22 | 56.03 | 55.95 | 73961.18 | 46232.38 | 7.25 | 78.72 | 129.51 | 431.6 | 7.07 |
| 2005/3/23 | 53.81 | 49.43 | 73961.18 | 46232.38 | 7.14 | 79.44 | 129.81 | 425.4 | 6.98 |
| 2005/3/24 | 54.84 | 49.7  | 73961.18 | 46232.38 | 7.06 | 79.43 | 130.56 | 424.8 | 6.93 |
| 2005/3/28 | 54.05 | 54.06 | 73961.18 | 46232.38 | 7    | 79.54 | 130.75 | 426   | 6.91 |
| 2005/3/29 | 54.23 | 54.26 | 73961.18 | 46232.38 | 7.32 | 79.22 | 130.15 | 426   | 7.01 |
| 2005/3/30 | 53.99 | 53.96 | 73961.18 | 46232.38 | 7.46 | 79.04 | 129.51 | 426.9 | 7.15 |
| 2005/3/31 | 55.4  | 55.31 | 73961.18 | 46232.38 | 7.65 | 78.54 | 128.58 | 428.7 | 7.18 |
| 2005/4/1  | 57.27 | 57.26 | 74274.68 | 43728.06 | 7.75 | 78.67 | 127.73 | 425.9 | 7    |
| 2005/4/4  | 57.01 | 56.86 | 74274.68 | 43728.06 | 7.59 | 78.9  | 128.44 | 423.9 | 7.02 |
| 2005/4/5  | 56.04 | 55.83 | 74274.68 | 43728.06 | 7.57 | 78.76 | 128.27 | 424.5 | 7.04 |
| 2005/4/6  | 55.85 | 55.88 | 74274.68 | 43728.06 | 7.56 | 78.69 | 128.07 | 427.1 | 7.12 |
| 2005/4/7  | 54.11 | 54.16 | 74274.68 | 43728.06 | 7.37 | 79.14 | 128.26 | 426.5 | 7.08 |
| 2005/4/8  | 53.32 | 53.46 | 74274.68 | 43728.06 | 7.24 | 78.56 | 129.01 | 426.9 | 7.17 |
| 2005/4/11 | 53.71 | 53.71 | 74274.68 | 43728.06 | 7.31 | 78.3  | 128.41 | 428.6 | 7.26 |
| 2005/4/12 | 51.86 | 51.54 | 74274.68 | 43728.06 | 7.09 | 78.25 | 127.92 | 427.6 | 7.16 |
| 2005/4/13 | 50.22 | 50.21 | 74274.68 | 43728.06 | 6.98 | 78.14 | 127.76 | 429.3 | 7.23 |
| 2005/4/14 | 51.13 | 51.11 | 74274.68 | 43728.06 | 7.07 | 78.68 | 127.98 | 424   | 7.06 |
| 2005/4/15 | 50.49 | 50.61 | 74274.68 | 43728.06 | 7    | 78.19 | 128.28 | 424.9 | 7.02 |
| 2005/4/18 | 50.37 | 50.52 | 74274.68 | 43728.06 | 6.95 | 77.75 | 127.79 | 427.5 | 7.05 |
| 2005/4/19 | 52.29 | 52.33 | 74274.68 | 43728.06 | 7.05 | 77.21 | 127.17 | 432.9 | 7.25 |
| 2005/4/20 | 52.44 | 52.45 | 74274.68 | 43728.06 | 7.06 | 77.12 | 126.47 | 435.3 | 7.34 |
| 2005/4/21 | 54.2  | 52.49 | 74274.68 | 43728.06 | 7.03 | 77.61 | 126.46 | 433   | 7.22 |
| 2005/4/22 | 55.39 | 54.16 | 74274.68 | 43728.06 | 7.2  | 77.33 | 126.99 | 434.3 | 7.28 |
| 2005/4/25 | 54.57 | 53.16 | 74274.68 | 43728.06 | 7.15 | 77.46 | 126.59 | 434.6 | 7.26 |
| 2005/4/26 | 54.2  | 54.33 | 74274.68 | 43728.06 | 7.12 | 77.69 | 126.67 | 437.9 | 7.26 |
| 2005/4/27 | 51.61 | 51.37 | 74274.68 | 43728.06 | 6.75 | 77.68 | 127.17 | 433   | 7.14 |
| 2005/4/28 | 51.77 | 51.92 | 74274.68 | 43728.06 | 6.75 | 77.62 | 127.01 | 432.4 | 6.91 |
| 2005/4/29 | 49.72 | 49.2  | 74274.68 | 43728.06 | 6.59 | 77.59 | 126.42 | 436.1 | 6.9  |
| 2005/5/2  | 50.92 | 50.94 | 74362.34 | 43213.65 | 6.7  | 78.51 | 126.42 | 430.5 | 6.84 |
| 2005/5/3  | 49.5  | 49.6  | 74362.34 | 43213.65 | 6.52 | 78.61 | 127.08 | 427.7 | 6.85 |
| 2005/5/4  | 50.13 | 50.22 | 74362.34 | 43213.65 | 6.63 | 78.2  | 126.78 | 430   | 6.98 |
| 2005/5/5  | 50.83 | 51.12 | 74362.34 | 43213.65 | 6.69 | 78.17 | 126.5  | 430.7 | 7.05 |
| 2005/5/6  | 50.96 | 51.3  | 74362.34 | 43213.65 | 6.62 | 78.7  | 126.82 | 426.9 | 6.95 |
| 2005/5/9  | 52.03 | 52.04 | 74362.34 | 43213.65 | 6.67 | 78.89 | 126.82 | 426.9 | 7.07 |
| 2005/5/10 | 52.07 | 51.76 | 74362.34 | 43213.65 | 6.69 | 79.04 | 126.82 | 427.9 | 7.1  |
| 2005/5/11 | 50.45 | 50.39 | 74362.34 | 43213.65 | 6.68 | 79.47 | 127.94 | 427.9 | 7.08 |
| 2005/5/12 | 48.54 | 48.83 | 74362.34 | 43213.65 | 6.51 | 79.8  | 128.46 | 422.2 | 6.95 |
| 2005/5/13 | 48.67 | 48.65 | 74362.34 | 43213.65 | 6.54 | 80.52 | 128.62 | 420.7 | 6.93 |
| 2005/5/16 | 48.61 | 48.64 | 74362.34 | 43213.65 | 6.45 | 80.95 | 129.56 | 419.3 | 6.94 |
| 2005/5/17 | 48.97 | 48.97 | 74362.34 | 43213.65 | 6.48 | 81.05 | 130.12 | 419.8 | 7.03 |
| 2005/5/18 | 47.25 | 46.99 | 74362.34 | 43213.65 | 6.39 | 80.89 | 130.47 | 421.9 | 7.19 |
| 2005/5/19 | 46.92 | 47    | 74362.34 | 43213.65 | 6.36 | 81.06 | 130.12 | 420.8 | 7.12 |
| 2005/5/20 | 46.8  | 47.25 | 74362.34 | 43213.65 | 6.34 | 81.4  | 130.34 | 417.7 | 6.94 |
| 2005/5/23 | 49.16 | 48.68 | 74362.34 | 43213.65 | 6.41 | 81.33 | 130.47 | 416.9 | 6.95 |
| 2005/5/24 | 49.67 | 49.14 | 74362.34 | 43213.65 | 6.35 | 81.39 | 130.41 | 417.7 | 6.99 |
| 2005/5/25 | 50.98 | 50.37 | 74362.34 | 43213.65 | 6.32 | 81.23 | 130.51 | 418.9 | 7.12 |
| 2005/5/26 | 51.01 | 50.89 | 74362.34 | 43213.65 | 6.12 | 81.72 | 130.62 | 418   | 7.15 |
| 2005/5/27 | 51.85 | 51.65 | 74362.34 | 43213.65 | 6.37 | 81.55 | 130.8  | 419.8 | 7.31 |
| 2005/5/31 | 51.97 | 52.08 | 74362.34 | 43213.65 | 6.38 | 81.86 | 129.94 | 416.3 | 7.45 |
| 2005/6/1  | 54.6  | 54.4  | 73968.61 | 44667.97 | 6.79 | 82.06 | 129.18 | 415.3 | 7.52 |
| 2005/6/2  | 53.63 | 53.46 | 73968.61 | 44667.97 | 6.82 | 81.87 | 129.25 | 422.7 | 7.55 |
| 2005/6/3  | 55.03 | 55.08 | 73968.61 | 44667.97 | 6.88 | 81.96 | 129.07 | 423.7 | 7.51 |
| 2005/6/6  | 54.49 | 54.46 | 73968.61 | 44667.97 | 7.12 | 81.52 | 128.92 | 426.5 | 7.54 |

|           |       |       |          |          |      |       |        |       |      |
|-----------|-------|-------|----------|----------|------|-------|--------|-------|------|
| 2005/6/7  | 53.76 | 53.84 | 73968.61 | 44667.97 | 7.13 | 81.04 | 128.08 | 424.8 | 7.45 |
| 2005/6/8  | 52.54 | 52.51 | 73968.61 | 44667.97 | 7    | 81.54 | 127.76 | 424.7 | 7.48 |
| 2005/6/9  | 54.28 | 54.36 | 73968.61 | 44667.97 | 7.05 | 81.69 | 128.08 | 424.2 | 7.27 |
| 2005/6/10 | 53.54 | 53.55 | 73968.61 | 44667.97 | 6.93 | 81.97 | 128.44 | 427.4 | 7.29 |
| 2005/6/13 | 55.62 | 55.47 | 73968.61 | 44667.97 | 7.26 | 82.25 | 128.44 | 429.3 | 7.27 |
| 2005/6/14 | 55    | 55.03 | 73968.61 | 44667.97 | 7.23 | 82.32 | 128.96 | 427.5 | 7.28 |
| 2005/6/15 | 55.57 | 55.53 | 73968.61 | 44667.97 | 7.44 | 81.57 | 128.54 | 429.1 | 7.33 |
| 2005/6/16 | 56.58 | 56.48 | 73968.61 | 44667.97 | 7.61 | 81.55 | 127.83 | 436.2 | 7.37 |
| 2005/6/17 | 58.47 | 58.4  | 73968.61 | 44667.97 | 7.69 | 81.24 | 127.89 | 438.3 | 7.34 |
| 2005/6/20 | 59.37 | 59.19 | 73968.61 | 44667.97 | 7.67 | 81.56 | 127.83 | 438.4 | 7.3  |
| 2005/6/21 | 58.9  | 58.9  | 73968.61 | 44667.97 | 7.47 | 81.31 | 127.79 | 438.9 | 7.29 |
| 2005/6/22 | 58.09 | 58.27 | 73968.61 | 44667.97 | 7.44 | 81.62 | 127.36 | 438.1 | 7.26 |
| 2005/6/23 | 59.42 | 59.23 | 73968.61 | 44667.97 | 7.47 | 81.93 | 127.66 | 441.7 | 7.27 |
| 2005/6/24 | 59.84 | 59.63 | 73968.61 | 44667.97 | 7.36 | 81.52 | 127.69 | 440.5 | 7.28 |
| 2005/6/27 | 60.54 | 59.78 | 73968.61 | 44667.97 | 7.14 | 81.29 | 127.54 | 440.3 | 7.24 |
| 2005/6/28 | 58.2  | 58.32 | 73968.61 | 44667.97 | 6.98 | 81.85 | 127.62 | 436.4 | 7.1  |
| 2005/6/29 | 57.26 | 57.23 | 73968.61 | 44667.97 | 7.09 | 82.3  | 127.86 | 438.6 | 7.06 |
| 2005/6/30 | 56.5  | 56.63 | 73968.61 | 44667.97 | 6.98 | 83.03 | 127.98 | 437.1 | 7.03 |
| 2005/7/1  | 58.75 | 59.11 | 73835.87 | 44090.59 | 7.17 | 83.82 | 129.72 | 428.8 | 6.85 |
| 2005/7/5  | 59.59 | 59.71 | 73835.87 | 44090.59 | 7.48 | 84.38 | 130.83 | 423.9 | 6.83 |
| 2005/7/6  | 61.28 | 61.24 | 73835.87 | 44090.59 | 7.69 | 84.58 | 130.76 | 424.5 | 6.92 |
| 2005/7/7  | 60.73 | 60.76 | 73835.87 | 44090.59 | 7.4  | 84.98 | 131.37 | 424.2 | 6.95 |
| 2005/7/8  | 59.63 | 59.71 | 73835.87 | 44090.59 | 7.47 | 85.25 | 132.06 | 423.8 | 6.99 |
| 2005/7/11 | 58.92 | 59.23 | 73835.87 | 44090.59 | 7.5  | 84.31 | 132.45 | 426.3 | 7.07 |
| 2005/7/12 | 60.62 | 60.49 | 73835.87 | 44090.59 | 7.89 | 83.35 | 131.57 | 427.1 | 7.05 |
| 2005/7/13 | 60.01 | 60    | 73835.87 | 44090.59 | 7.9  | 84.04 | 130.83 | 424.6 | 7.03 |
| 2005/7/14 | 57.8  | 57.83 | 73835.87 | 44090.59 | 7.84 | 84.36 | 131.11 | 420.2 | 6.96 |
| 2005/7/15 | 58.09 | 58.36 | 73835.87 | 44090.59 | 7.85 | 84.65 | 131.56 | 421.3 | 6.96 |
| 2005/7/18 | 57.32 | 57.12 | 73835.87 | 44090.59 | 7.65 | 84.78 | 131.77 | 421   | 6.97 |
| 2005/7/19 | 57.46 | 57.61 | 73835.87 | 44090.59 | 7.59 | 85.17 | 132.48 | 420.2 | 6.95 |
| 2005/7/20 | 56.72 | 56.73 | 73835.87 | 44090.59 | 7.55 | 85.16 | 133.11 | 422.1 | 7.04 |
| 2005/7/21 | 57.13 | 57.31 | 73835.87 | 44090.59 | 7.3  | 84.56 | 133.09 | 425.7 | 7.11 |
| 2005/7/22 | 58.65 | 57.75 | 73835.87 | 44090.59 | 7.38 | 85.17 | 132.17 | 425   | 7.09 |
| 2005/7/25 | 59    | 58.16 | 73835.87 | 44090.59 | 7.28 | 84.84 | 133.06 | 425.9 | 7.11 |
| 2005/7/26 | 59.2  | 59.05 | 73835.87 | 44090.59 | 7.43 | 85.28 | 132.55 | 423.5 | 6.99 |
| 2005/7/27 | 59.11 | 59.12 | 73835.87 | 44090.59 | 7.65 | 85    | 132.9  | 424.8 | 7.02 |
| 2005/7/28 | 59.94 | 59.91 | 73835.87 | 44090.59 | 7.69 | 84.41 | 132.67 | 427.4 | 7.2  |
| 2005/7/29 | 60.57 | 60.71 | 73835.87 | 44090.59 | 7.89 | 84.38 | 131.88 | 429.9 | 7.26 |
| 2005/8/1  | 61.57 | 61.51 | 73831.89 | 44822.71 | 8.15 | 83.67 | 132.2  | 431.9 | 7.31 |
| 2005/8/2  | 61.89 | 61.87 | 73831.89 | 44822.71 | 8.38 | 83.45 | 131.52 | 431.9 | 7.26 |
| 2005/8/3  | 60.86 | 60.76 | 73831.89 | 44822.71 | 8.35 | 83.17 | 131.64 | 436.9 | 7.31 |
| 2005/8/4  | 61.38 | 61.6  | 73831.89 | 44822.71 | 8.47 | 83.02 | 131.51 | 437.9 | 7.25 |
| 2005/8/5  | 62.31 | 62.44 | 73831.89 | 44822.71 | 8.7  | 83.11 | 131.8  | 437.2 | 7.16 |
| 2005/8/8  | 63.94 | 63.92 | 73831.89 | 44822.71 | 8.68 | 82.84 | 131.94 | 434.7 | 7.02 |
| 2005/8/9  | 63.07 | 63.13 | 73831.89 | 44822.71 | 8.65 | 82.71 | 131.22 | 434.2 | 7.04 |
| 2005/8/10 | 64.9  | 64.8  | 73831.89 | 44822.71 | 9.07 | 82.27 | 131    | 436.5 | 7.08 |
| 2005/8/11 | 65.8  | 65.67 | 73831.89 | 44822.71 | 9.3  | 81.61 | 130.07 | 445.5 | 7.18 |
| 2005/8/12 | 66.86 | 66.71 | 73831.89 | 44822.71 | 9.59 | 81.51 | 129.84 | 445.9 | 7.09 |
| 2005/8/15 | 66.27 | 66.21 | 73831.89 | 44822.71 | 9.54 | 81.6  | 129.38 | 442.2 | 6.97 |
| 2005/8/16 | 66.08 | 66.11 | 73831.89 | 44822.71 | 9.75 | 81.68 | 129.53 | 446.1 | 7.04 |
| 2005/8/17 | 63.25 | 63.29 | 73831.89 | 44822.71 | 9.39 | 81.84 | 129.69 | 439.9 | 6.99 |
| 2005/8/18 | 63.27 | 63.47 | 73831.89 | 44822.71 | 8.93 | 82.43 | 129.38 | 439.5 | 7    |
| 2005/8/19 | 65.35 | 65.51 | 73831.89 | 44822.71 | 9.11 | 82.28 | 129.88 | 437.2 | 7.01 |
| 2005/8/22 | 65.45 | 65.46 | 73831.89 | 44822.71 | 9.56 | 82.12 | 129.48 | 438.1 | 7.06 |



|            |       |       |          |          |       |       |        |       |      |
|------------|-------|-------|----------|----------|-------|-------|--------|-------|------|
| 2005/8/23  | 65.71 | 65.81 | 73831.89 | 44822.71 | 9.68  | 82.1  | 129.61 | 439.4 | 6.97 |
| 2005/8/24  | 67.32 | 67.1  | 73831.89 | 44822.71 | 9.98  | 82.1  | 129.86 | 437.3 | 6.92 |
| 2005/8/25  | 67.49 | 67.29 | 73831.89 | 44822.71 | 9.77  | 82.02 | 129.5  | 438.4 | 6.83 |
| 2005/8/26  | 66.13 | 66.05 | 73831.89 | 44822.71 | 9.79  | 82.07 | 129.78 | 437.4 | 6.74 |
| 2005/8/29  | 67.2  | 67.41 | 73831.89 | 44822.71 | 10.85 | 82.32 | 129.61 | 437   | 6.73 |
| 2005/8/30  | 69.81 | 69.91 | 73831.89 | 44822.71 | 11.66 | 82.78 | 130.04 | 432.5 | 6.69 |
| 2005/8/31  | 68.94 | 68.63 | 73831.89 | 44822.71 | 11.47 | 81.95 | 130.64 | 435.1 | 6.78 |
| 2005/9/1   | 69.47 | 69.5  | 73409.44 | 44005.46 | 11.76 | 79.84 | 129.71 | 443.5 | 6.97 |
| 2005/9/2   | 67.57 | 66.91 | 73409.44 | 44005.46 | 11.69 | 79.41 | 128.2  | 445.4 | 7.01 |
| 2005/9/6   | 65.96 | 65.83 | 73409.44 | 44005.46 | 11.66 | 79.49 | 128.23 | 445.5 | 7.03 |
| 2005/9/7   | 64.37 | 64.38 | 73409.44 | 44005.46 | 11.2  | 79.74 | 128.24 | 446   | 7.05 |
| 2005/9/8   | 64.49 | 64.8  | 73409.44 | 44005.46 | 11.35 | 79.75 | 128.23 | 447.7 | 6.97 |
| 2005/9/9   | 64.08 | 64.21 | 73409.44 | 44005.46 | 11.26 | 79.61 | 128.13 | 450   | 7    |
| 2005/9/12  | 63.34 | 63.29 | 73409.44 | 44005.46 | 11.03 | 80.48 | 127.95 | 450.7 | 7    |
| 2005/9/13  | 63.11 | 63.18 | 73409.44 | 44005.46 | 10.76 | 80.34 | 128.8  | 447   | 6.94 |
| 2005/9/14  | 65.09 | 65.2  | 73409.44 | 44005.46 | 11.17 | 80.33 | 128.74 | 450.7 | 6.99 |
| 2005/9/15  | 64.75 | 64.64 | 73409.44 | 44005.46 | 11.34 | 81.07 | 129.08 | 456.3 | 7.02 |
| 2005/9/16  | 63    | 62.91 | 73409.44 | 44005.46 | 11.14 | 80.97 | 129.9  | 460.3 | 7.23 |
| 2005/9/19  | 67.39 | 67.21 | 73409.44 | 44005.46 | 12.66 | 81.24 | 129.94 | 467.3 | 7.34 |
| 2005/9/20  | 66.23 | 66.24 | 73409.44 | 44005.46 | 12.49 | 81.38 | 129.85 | 466.8 | 7.32 |
| 2005/9/21  | 66.8  | 66.96 | 73409.44 | 44005.46 | 12.59 | 80.83 | 129.93 | 469.4 | 7.36 |
| 2005/9/22  | 66.5  | 67.07 | 73409.44 | 44005.46 | 12.79 | 81.79 | 129.84 | 467   | 7.35 |
| 2005/9/23  | 64.19 | 64.67 | 73409.44 | 44005.46 | 12.32 | 82.35 | 130.8  | 463.9 | 7.27 |
| 2005/9/26  | 65.82 | 65.98 | 73409.44 | 44005.46 | 12.44 | 82.32 | 131.44 | 466.2 | 7.31 |
| 2005/9/27  | 65.07 | 64.94 | 73409.44 | 44005.46 | 12.66 | 82.83 | 131.8  | 462.9 | 7.27 |
| 2005/9/28  | 66.35 | 66.36 | 73409.44 | 44005.46 | 13.91 | 82.8  | 131.76 | 469.8 | 7.35 |
| 2005/9/29  | 66.79 | 66.83 | 73409.44 | 44005.46 | 14.2  | 83.13 | 132.14 | 472.3 | 7.56 |
| 2005/9/30  | 66.24 | 66.21 | 73409.44 | 44005.46 | 13.92 | 83.01 | 131.94 | 469   | 7.51 |
| 2005/10/3  | 65.47 | 65.36 | 73469.56 | 43282.77 | 14.02 | 83.4  | 131.76 | 466.1 | 7.46 |
| 2005/10/4  | 63.9  | 63.74 | 73469.56 | 43282.77 | 14.22 | 83.17 | 131.71 | 466.1 | 7.43 |
| 2005/10/5  | 62.79 | 62.56 | 73469.56 | 43282.77 | 14.18 | 82.93 | 131.49 | 466.1 | 7.48 |
| 2005/10/6  | 61.36 | 61.81 | 73469.56 | 43282.77 | 13.38 | 82.23 | 131.04 | 471.9 | 7.6  |
| 2005/10/7  | 61.84 | 61.81 | 73469.56 | 43282.77 | 13.23 | 83.09 | 131.22 | 474.7 | 7.77 |
| 2005/10/10 | 61.8  | 60.71 | 73469.56 | 43282.77 | 12.98 | 83.33 | 132.29 | 475.1 | 7.85 |
| 2005/10/11 | 63.53 | 63.84 | 73469.56 | 43282.77 | 13.52 | 83.77 | 132.8  | 477.1 | 7.88 |
| 2005/10/12 | 64.12 | 64.13 | 73469.56 | 43282.77 | 13.52 | 83.47 | 132.98 | 473.9 | 7.84 |
| 2005/10/13 | 63.08 | 63.05 | 73469.56 | 43282.77 | 13.1  | 83.31 | 132.65 | 471.1 | 7.74 |
| 2005/10/14 | 62.63 | 62.61 | 73469.56 | 43282.77 | 13.22 | 82.65 | 132.2  | 469.2 | 7.86 |
| 2005/10/17 | 64.36 | 64.26 | 73469.56 | 43282.77 | 13.89 | 83.43 | 131.52 | 474.1 | 7.88 |
| 2005/10/18 | 63.2  | 62.94 | 73469.56 | 43282.77 | 13.42 | 83.55 | 132.42 | 472.1 | 7.84 |
| 2005/10/19 | 62.41 | 62.11 | 73469.56 | 43282.77 | 13.55 | 82.92 | 132.35 | 463.5 | 7.64 |
| 2005/10/20 | 61.03 | 61.04 | 73469.56 | 43282.77 | 12.98 | 82.47 | 131.49 | 461   | 7.66 |
| 2005/10/21 | 60.63 | 61.05 | 73469.56 | 43282.77 | 12.87 | 82.76 | 130.69 | 467   | 7.7  |
| 2005/10/24 | 60.32 | 60.63 | 73469.56 | 43282.77 | 13    | 82.68 | 131.09 | 465   | 7.71 |
| 2005/10/25 | 62.44 | 62.83 | 73469.56 | 43282.77 | 14.34 | 82.02 | 131.32 | 472.8 | 7.83 |
| 2005/10/26 | 60.66 | 60.85 | 73469.56 | 43282.77 | 14.04 | 82.4  | 130.4  | 471.2 | 7.86 |
| 2005/10/27 | 61.09 | 61.03 | 73469.56 | 43282.77 | 13.83 | 82.06 | 130.79 | 473.8 | 7.84 |
| 2005/10/28 | 61.22 | 61.3  | 73469.56 | 43282.77 | 13.06 | 82.51 | 130.75 | 474.8 | 7.82 |
| 2005/10/31 | 59.76 | 59.8  | 73469.56 | 43282.77 | 12.21 | 82.65 | 129.94 | 466.9 | 7.58 |
| 2005/11/1  | 59.85 | 59.85 | 74044.8  | 44809.56 | 11.86 | 83.54 | 130.15 | 460.6 | 7.47 |
| 2005/11/2  | 59.75 | 59.75 | 74044.8  | 44809.56 | 11.6  | 83    | 130.32 | 464.6 | 7.56 |
| 2005/11/3  | 61.78 | 61.7  | 74044.8  | 44809.56 | 11.69 | 83.28 | 129.87 | 461.9 | 7.62 |
| 2005/11/4  | 60.58 | 60.6  | 74044.8  | 44809.56 | 11.42 | 84.22 | 129.87 | 457.9 | 7.57 |
| 2005/11/7  | 59.47 | 59.4  | 74044.8  | 44809.56 | 11.87 | 84.56 | 130.76 | 460.4 | 7.61 |

|            |       |       |          |          |       |       |        |       |      |
|------------|-------|-------|----------|----------|-------|-------|--------|-------|------|
| 2005/11/8  | 59.71 | 59.7  | 74044.8  | 44809.56 | 11.79 | 84.55 | 131.33 | 462.3 | 7.63 |
| 2005/11/9  | 58.93 | 59.65 | 74044.8  | 44809.56 | 11.67 | 84.56 | 130.89 | 467.5 | 7.68 |
| 2005/11/10 | 57.8  | 57.8  | 74044.8  | 44809.56 | 11.38 | 84.67 | 131.07 | 467.7 | 7.71 |
| 2005/11/11 | 57.53 | 57.45 | 74044.8  | 44809.56 | 11.71 | 84.8  | 130.76 | 469.4 | 7.76 |
| 2005/11/14 | 57.69 | 57.6  | 74044.8  | 44809.56 | 11.61 | 84.91 | 130.96 | 469.1 | 7.78 |
| 2005/11/15 | 56.98 | 57.05 | 74044.8  | 44809.56 | 11.56 | 84.98 | 131.19 | 469   | 7.79 |
| 2005/11/16 | 57.88 | 57.85 | 74044.8  | 44809.56 | 12.33 | 85.84 | 131.54 | 479.1 | 8    |
| 2005/11/17 | 56.34 | 56.2  | 74044.8  | 44809.56 | 11.94 | 85.71 | 132.58 | 486.9 | 8.1  |
| 2005/11/18 | 56.14 | 56.3  | 74044.8  | 44809.56 | 11.41 | 85.89 | 132.89 | 486.2 | 8.07 |
| 2005/11/21 | 57.7  | 57.75 | 74044.8  | 44809.56 | 11.33 | 85.83 | 133.1  | 489.5 | 8.13 |
| 2005/11/22 | 58.84 | 58.3  | 74044.8  | 44809.56 | 11.61 | 85.65 | 133.13 | 492.9 | 8.17 |
| 2005/11/23 | 58.71 | 58.35 | 74044.8  | 44809.56 | 11.62 | 85.58 | 132.91 | 492.3 | 8.13 |
| 2005/11/28 | 57.36 | 57.36 | 74044.8  | 44809.56 | 11.18 | 85.1  | 133.25 | 498.3 | 8.35 |
| 2005/11/29 | 56.5  | 56.46 | 74044.8  | 44809.56 | 11.74 | 85.74 | 132.79 | 499.1 | 8.3  |
| 2005/11/30 | 57.32 | 57.33 | 74044.8  | 44809.56 | 12.59 | 85.27 | 132.13 | 494.6 | 8.28 |
| 2005/12/1  | 58.47 | 58.46 | 74243.08 | 46572.49 | 13.03 | 85.69 | 131.39 | 502.5 | 8.5  |
| 2005/12/2  | 59.32 | 59.31 | 74243.08 | 46572.49 | 13.93 | 85.63 | 130.6  | 503.3 | 8.54 |
| 2005/12/5  | 59.91 | 59.91 | 74243.08 | 46572.49 | 13.66 | 85.2  | 130.51 | 508.9 | 8.63 |
| 2005/12/6  | 59.94 | 59.96 | 74243.08 | 46572.49 | 13.49 | 85.23 | 130.01 | 510.2 | 8.69 |
| 2005/12/7  | 59.21 | 59.21 | 74243.08 | 46572.49 | 13.7  | 85.59 | 130.36 | 514.3 | 8.78 |
| 2005/12/8  | 60.66 | 60.66 | 74243.08 | 46572.49 | 14.99 | 84.64 | 130.18 | 519.3 | 8.89 |
| 2005/12/9  | 59.39 | 59.41 | 74243.08 | 46572.49 | 14.31 | 84.61 | 129.25 | 527   | 9    |
| 2005/12/12 | 61.3  | 61.36 | 74243.08 | 46572.49 | 14.84 | 83.61 | 129    | 528.4 | 8.79 |
| 2005/12/13 | 61.37 | 61.36 | 74243.08 | 46572.49 | 15.38 | 83.9  | 128.45 | 521   | 8.5  |
| 2005/12/14 | 60.85 | 60.86 | 74243.08 | 46572.49 | 14.68 | 83.73 | 128.79 | 506.5 | 8.38 |
| 2005/12/15 | 59.99 | 60.01 | 74243.08 | 46572.49 | 13.78 | 84.14 | 128.84 | 503.9 | 8.55 |
| 2005/12/16 | 58.06 | 58.01 | 74243.08 | 46572.49 | 13.63 | 83.76 | 129.36 | 503.4 | 8.52 |
| 2005/12/19 | 57.34 | 57.31 | 74243.08 | 46572.49 | 14.04 | 84.22 | 129.09 | 503.6 | 8.57 |
| 2005/12/20 | 57.98 | 57.81 | 74243.08 | 46572.49 | 14.08 | 84.58 | 129.65 | 494.6 | 8.31 |
| 2005/12/21 | 58.56 | 58.56 | 74243.08 | 46572.49 | 14.27 | 85.08 | 129.46 | 493   | 8.35 |
| 2005/12/22 | 58.28 | 58.08 | 74243.08 | 46572.49 | 12.92 | 85.47 | 130.19 | 502.7 | 8.5  |
| 2005/12/23 | 58.43 | 58.08 | 74243.08 | 46572.49 | 12.28 | 85.6  | 130.72 | 503   | 8.57 |
| 2005/12/27 | 58.16 | 58.16 | 74243.08 | 46572.49 | 11.02 | 85.95 | 131.21 | 508   | 8.74 |
| 2005/12/28 | 59.82 | 59.81 | 74243.08 | 46572.49 | 11.43 | 86.49 | 131.13 | 514.2 | 8.87 |
| 2005/12/29 | 60.32 | 60.26 | 74243.08 | 46572.49 | 11.22 | 86.07 | 131.97 | 517.5 | 8.81 |
| 2005/12/30 | 61.04 | 61.06 | 74243.08 | 46572.49 | 11.23 | 86.31 | 131.63 | 518.9 | 8.82 |
| 2006/1/3   | 63.14 | 63.11 | 73711.3  | 45803.97 | 10.63 | 83.96 | 131.63 | 532.5 | 9.09 |
| 2006/1/4   | 63.42 | 63.41 | 73711.3  | 45803.97 | 10.2  | 83.36 | 131.63 | 535.6 | 9.1  |
| 2006/1/5   | 62.79 | 62.81 | 73711.3  | 45803.97 | 9.5   | 83.48 | 131.63 | 527.8 | 8.81 |
| 2006/1/6   | 64.21 | 64.21 | 73711.3  | 45803.97 | 9.63  | 82.79 | 131.63 | 541.2 | 9.11 |
| 2006/1/9   | 63.5  | 63.56 | 73711.3  | 45803.97 | 9.36  | 83.03 | 131.63 | 550.5 | 9.22 |
| 2006/1/10  | 63.37 | 63.41 | 73711.3  | 45803.97 | 9.34  | 83.08 | 126.64 | 545.7 | 8.96 |
| 2006/1/11  | 63.94 | 63.91 | 73711.3  | 45803.97 | 9.24  | 83.09 | 126.69 | 550.1 | 9.01 |
| 2006/1/12  | 63.94 | 63.96 | 73711.3  | 45803.97 | 8.94  | 83.28 | 126.76 | 549.3 | 9.01 |
| 2006/1/13  | 63.92 | 63.86 | 73711.3  | 45803.97 | 8.79  | 82.53 | 126.57 | 557   | 9.11 |
| 2006/1/17  | 66.31 | 66.36 | 73711.3  | 45803.97 | 9.17  | 82.93 | 127.16 | 554.3 | 9.02 |
| 2006/1/18  | 65.73 | 65.76 | 73711.3  | 45803.97 | 8.69  | 83.1  | 127.42 | 544.5 | 8.82 |
| 2006/1/19  | 66.83 | 66.86 | 73711.3  | 45803.97 | 8.91  | 83.31 | 127.83 | 559   | 9.06 |
| 2006/1/20  | 68.35 | 68.16 | 73711.3  | 45803.97 | 9.28  | 82.74 | 127.83 | 554   | 8.88 |
| 2006/1/23  | 68.1  | 68.06 | 73711.3  | 45803.97 | 8.57  | 82.07 | 127.21 | 558.7 | 9.03 |
| 2006/1/24  | 67.06 | 66.83 | 73711.3  | 45803.97 | 8.68  | 82.14 | 127.25 | 558.1 | 9.18 |
| 2006/1/25  | 65.85 | 65.6  | 73711.3  | 45803.97 | 8.46  | 82.17 | 127.39 | 562.5 | 9.47 |
| 2006/1/26  | 66.26 | 65.8  | 73711.3  | 45803.97 | 8.23  | 82.35 | 127.27 | 559.9 | 9.56 |
| 2006/1/27  | 67.76 | 67.81 | 73711.3  | 45803.97 | 8.4   | 82.93 | 127.46 | 558.8 | 9.57 |

|           |       |       |          |          |      |       |        |       |       |
|-----------|-------|-------|----------|----------|------|-------|--------|-------|-------|
| 2006/1/30 | 68.35 | 68.36 | 73711.3  | 45803.97 | 9.39 | 82.88 | 127.92 | 565.8 | 9.78  |
| 2006/1/31 | 67.92 | 67.86 | 73711.3  | 45803.97 | 9.32 | 82.38 | 126.1  | 570.8 | 9.89  |
| 2006/2/1  | 66.56 | 66.61 | 73707.7  | 46350.13 | 8.72 | 82.74 | 125.58 | 569.4 | 9.8   |
| 2006/2/2  | 64.68 | 64.71 | 73707.7  | 46350.13 | 8.35 | 82.46 | 125.47 | 572.5 | 9.88  |
| 2006/2/3  | 65.37 | 65.41 | 73707.7  | 46350.13 | 8.61 | 83.35 | 125.35 | 567.4 | 9.76  |
| 2006/2/6  | 65.11 | 65.11 | 73707.7  | 46350.13 | 8    | 84.03 | 126.45 | 570.2 | 9.76  |
| 2006/2/7  | 63.09 | 63.01 | 73707.7  | 46350.13 | 7.86 | 84.17 | 127.09 | 551   | 9.41  |
| 2006/2/8  | 62.55 | 62.51 | 73707.7  | 46350.13 | 7.74 | 84.32 | 127.38 | 550.1 | 9.44  |
| 2006/2/9  | 62.62 | 62.66 | 73707.7  | 46350.13 | 7.48 | 84.33 | 127.38 | 564.5 | 9.66  |
| 2006/2/10 | 61.84 | 62.01 | 73707.7  | 46350.13 | 7.32 | 84.16 | 127.35 | 550.2 | 9.38  |
| 2006/2/13 | 61.24 | 61.26 | 73707.7  | 46350.13 | 7.24 | 84.34 | 127.6  | 539   | 9.12  |
| 2006/2/14 | 59.57 | 59.61 | 73707.7  | 46350.13 | 7.11 | 84.59 | 127.83 | 545.9 | 9.32  |
| 2006/2/15 | 57.65 | 57.61 | 73707.7  | 46350.13 | 7.07 | 84.35 | 128.3  | 539.7 | 9.22  |
| 2006/2/16 | 58.46 | 58.61 | 73707.7  | 46350.13 | 7.13 | 84.43 | 127.93 | 546   | 9.37  |
| 2006/2/17 | 59.88 | 59.76 | 73707.7  | 46350.13 | 7.18 | 84.35 | 128.1  | 551.8 | 9.42  |
| 2006/2/21 | 61.1  | 61.21 | 73707.7  | 46350.13 | 7.73 | 84.12 | 127.69 | 553.9 | 9.55  |
| 2006/2/22 | 61.01 | 59.03 | 73707.7  | 46350.13 | 7.28 | 84.21 | 127.59 | 553.9 | 9.58  |
| 2006/2/23 | 60.54 | 58.03 | 73707.7  | 46350.13 | 7.46 | 83.84 | 127.59 | 548.4 | 9.47  |
| 2006/2/24 | 62.91 | 61.46 | 73707.7  | 46350.13 | 7.11 | 84.14 | 127.59 | 558.8 | 9.73  |
| 2006/2/27 | 61    | 61.01 | 73707.7  | 46350.13 | 6.79 | 84.39 | 128.11 | 557   | 9.6   |
| 2006/2/28 | 61.41 | 61.37 | 73707.7  | 46350.13 | 6.71 | 83.74 | 127.49 | 563.9 | 9.72  |
| 2006/3/1  | 61.97 | 62.01 | 73574.02 | 45783.16 | 6.73 | 83.58 | 126.82 | 565.8 | 9.71  |
| 2006/3/2  | 63.36 | 63.36 | 73574.02 | 45783.16 | 6.76 | 83.37 | 127.06 | 570.4 | 10.13 |
| 2006/3/3  | 63.67 | 63.61 | 73574.02 | 45783.16 | 6.79 | 83.37 | 127.37 | 568   | 10.16 |
| 2006/3/6  | 62.41 | 62.46 | 73574.02 | 45783.16 | 6.55 | 83.54 | 126.96 | 556.8 | 9.95  |
| 2006/3/7  | 61.58 | 61.51 | 73574.02 | 45783.16 | 6.68 | 84.23 | 127.55 | 554.5 | 10.04 |
| 2006/3/8  | 60.02 | 60.06 | 73574.02 | 45783.16 | 6.65 | 84.1  | 127.55 | 544.3 | 9.78  |
| 2006/3/9  | 60.47 | 60.51 | 73574.02 | 45783.16 | 6.6  | 84.25 | 128.18 | 547   | 9.9   |
| 2006/3/10 | 59.96 | 59.91 | 73574.02 | 45783.16 | 6.65 | 84.71 | 128.14 | 541.3 | 9.9   |
| 2006/3/13 | 61.77 | 61.81 | 73574.02 | 45783.16 | 7.01 | 84.39 | 128.8  | 547.5 | 10.09 |
| 2006/3/14 | 63.1  | 63.01 | 73574.02 | 45783.16 | 7.17 | 83.74 | 128.37 | 553   | 10.18 |
| 2006/3/15 | 62.17 | 62.11 | 73574.02 | 45783.16 | 7.14 | 83.67 | 128.2  | 554.4 | 10.29 |
| 2006/3/16 | 63.58 | 63.46 | 73574.02 | 45783.16 | 7.27 | 83.21 | 128.41 | 555.4 | 10.28 |
| 2006/3/17 | 62.77 | 62.81 | 73574.02 | 45783.16 | 7.05 | 83.22 | 128.29 | 555.1 | 10.31 |
| 2006/3/20 | 60.42 | 60.31 | 73574.02 | 45783.16 | 6.84 | 83.25 | 128.24 | 556.1 | 10.31 |
| 2006/3/21 | 60.57 | 60.41 | 73574.02 | 45783.16 | 6.87 | 83.66 | 128.34 | 553.2 | 10.52 |
| 2006/3/22 | 61.77 | 60.03 | 73574.02 | 45783.16 | 6.95 | 83.69 | 128.61 | 551.7 | 10.45 |
| 2006/3/23 | 63.91 | 62.13 | 73574.02 | 45783.16 | 7.33 | 84.32 | 128.66 | 550.8 | 10.64 |
| 2006/3/24 | 64.26 | 63.9  | 73574.02 | 45783.16 | 7.29 | 83.92 | 129.08 | 560.5 | 10.69 |
| 2006/3/27 | 64.16 | 63.75 | 73574.02 | 45783.16 | 7.07 | 83.74 | 128.52 | 567.4 | 10.85 |
| 2006/3/28 | 66.07 | 65.65 | 73574.02 | 45783.16 | 7.21 | 83.91 | 128.45 | 567   | 10.83 |
| 2006/3/29 | 66.45 | 66    | 73574.02 | 45783.16 | 7.23 | 84.34 | 128.54 | 573.3 | 11.07 |
| 2006/3/30 | 67.15 | 66.7  | 73574.02 | 45783.16 | 7.49 | 83.74 | 129.01 | 586.7 | 11.66 |
| 2006/3/31 | 66.63 | 66.25 | 73574.02 | 45783.16 | 7.21 | 84.21 | 129.4  | 581.8 | 11.52 |
| 2006/4/3  | 66.74 | 66.07 | 73635.23 | 43490.54 | 7.24 | 83.87 | 130.15 | 589.4 | 11.77 |
| 2006/4/4  | 66.23 | 65.75 | 73635.23 | 43490.54 | 7.07 | 83.14 | 129.83 | 586   | 11.73 |
| 2006/4/5  | 67.07 | 66.76 | 73635.23 | 43490.54 | 7.07 | 83.18 | 129.06 | 587.9 | 11.71 |
| 2006/4/6  | 67.94 | 67.22 | 73635.23 | 43490.54 | 6.97 | 83.29 | 129.55 | 595.2 | 12.05 |
| 2006/4/7  | 67.39 | 67.02 | 73635.23 | 43490.54 | 6.74 | 83.68 | 129.26 | 588.4 | 12.07 |
| 2006/4/10 | 68.74 | 68.29 | 73635.23 | 43490.54 | 6.88 | 83.66 | 129.33 | 597.6 | 12.56 |
| 2006/4/11 | 68.98 | 69.03 | 73635.23 | 43490.54 | 6.91 | 83.46 | 129.5  | 595.2 | 12.6  |
| 2006/4/12 | 68.62 | 68.53 | 73635.23 | 43490.54 | 6.81 | 83.37 | 129.23 | 597.5 | 12.66 |
| 2006/4/13 | 69.32 | 69.53 | 73635.23 | 43490.54 | 7.14 | 83.26 | 128.77 | 596.5 | 12.86 |
| 2006/4/17 | 70.4  | 70.3  | 73635.23 | 43490.54 | 7.58 | 82.42 | 128.7  | 615.4 | 13.37 |

|           |       |       |          |          |      |       |        |       |       |
|-----------|-------|-------|----------|----------|------|-------|--------|-------|-------|
| 2006/4/18 | 71.35 | 71.28 | 73635.23 | 43490.54 | 8.01 | 81.83 | 128.03 | 620   | 13.79 |
| 2006/4/19 | 72.17 | 72.07 | 73635.23 | 43490.54 | 8.19 | 81.41 | 127.75 | 632.6 | 14.52 |
| 2006/4/20 | 71.95 | 71.96 | 73635.23 | 43490.54 | 8.06 | 82.06 | 127.27 | 619.8 | 12.53 |
| 2006/4/21 | 75.17 | 73.73 | 73635.23 | 43490.54 | 7.98 | 81.87 | 127.73 | 632.2 | 12.97 |
| 2006/4/24 | 73.33 | 70.19 | 73635.23 | 43490.54 | 7.56 | 81.71 | 127.54 | 620.6 | 11.78 |
| 2006/4/25 | 72.88 | 67.43 | 73635.23 | 43490.54 | 7.25 | 81.63 | 127.53 | 631   | 12.56 |
| 2006/4/26 | 71.93 | 71.71 | 73635.23 | 43490.54 | 7.2  | 81.77 | 127.71 | 638.8 | 12.82 |
| 2006/4/27 | 70.97 | 70.76 | 73635.23 | 43490.54 | 6.81 | 80.99 | 127.98 | 636.3 | 12.47 |
| 2006/4/28 | 71.88 | 71.8  | 73635.23 | 43490.54 | 6.56 | 80.02 | 127.21 | 654.5 | 13.51 |
| 2006/5/1  | 73.7  | 73.75 | 73178.42 | 43645.92 | 6.7  | 80.11 | 127.21 | 660.2 | 13.85 |
| 2006/5/2  | 74.61 | 74.62 | 73178.42 | 43645.92 | 6.75 | 79.43 | 126.01 | 667.4 | 14.11 |
| 2006/5/3  | 72.28 | 72.26 | 73178.42 | 43645.92 | 6.61 | 79.3  | 125.11 | 668.5 | 13.7  |
| 2006/5/4  | 69.94 | 69.98 | 73178.42 | 43645.92 | 6.91 | 78.87 | 125.2  | 676.5 | 13.74 |
| 2006/5/5  | 70.19 | 70.09 | 73178.42 | 43645.92 | 6.78 | 78.61 | 124.67 | 684.3 | 13.79 |
| 2006/5/8  | 69.77 | 69.75 | 73178.42 | 43645.92 | 6.7  | 78.65 | 124.67 | 679.9 | 13.68 |
| 2006/5/9  | 70.69 | 70.71 | 73178.42 | 43645.92 | 6.58 | 78.26 | 124.67 | 701.5 | 14.37 |
| 2006/5/10 | 72.13 | 72.15 | 73178.42 | 43645.92 | 6.9  | 78.35 | 124.08 | 705.7 | 14.19 |
| 2006/5/11 | 73.32 | 73    | 73178.42 | 43645.92 | 6.65 | 77.63 | 124.66 | 721.5 | 14.85 |
| 2006/5/12 | 72.04 | 71.87 | 73178.42 | 43645.92 | 6.28 | 77.11 | 123.08 | 711.8 | 14.15 |
| 2006/5/15 | 69.41 | 69.25 | 73178.42 | 43645.92 | 6.12 | 77.74 | 122.7  | 685   | 13.25 |
| 2006/5/16 | 69.53 | 69.4  | 73178.42 | 43645.92 | 6.25 | 77.37 | 123.04 | 692.9 | 13.45 |
| 2006/5/17 | 68.69 | 68.65 | 73178.42 | 43645.92 | 6.13 | 77.71 | 122.74 | 691.8 | 13.16 |
| 2006/5/18 | 69.45 | 69.63 | 73178.42 | 43645.92 | 6    | 77.1  | 122.88 | 680.9 | 12.44 |
| 2006/5/19 | 68.53 | 68.44 | 73178.42 | 43645.92 | 5.96 | 77.8  | 122.68 | 657.5 | 12.28 |
| 2006/5/22 | 69.23 | 69.23 | 73178.42 | 43645.92 | 6.28 | 77.5  | 123.63 | 657.7 | 12.36 |
| 2006/5/23 | 71.76 | 70.78 | 73178.42 | 43645.92 | 6.26 | 77.75 | 123.05 | 673.7 | 13.1  |
| 2006/5/24 | 69.86 | 69.47 | 73178.42 | 43645.92 | 5.96 | 78.18 | 123.5  | 637.5 | 12.45 |
| 2006/5/25 | 71.32 | 70.92 | 73178.42 | 43645.92 | 5.98 | 77.83 | 123.89 | 648.5 | 12.54 |
| 2006/5/26 | 71.37 | 71.35 | 73178.42 | 43645.92 | 5.93 | 78.69 | 123.79 | 651   | 12.68 |
| 2006/5/30 | 72.03 | 71.85 | 73178.42 | 43645.92 | 6.12 | 77.57 | 123.82 | 653.9 | 13.07 |
| 2006/5/31 | 71.29 | 71.42 | 73178.42 | 43645.92 | 6.38 | 78.07 | 123.5  | 642.5 | 12.46 |
| 2006/6/1  | 70.34 | 70.11 | 73175.37 | 44663.38 | 6.45 | 78.34 | 123.97 | 627.6 | 11.91 |
| 2006/6/2  | 72.33 | 72.73 | 73175.37 | 44663.38 | 6.62 | 77.61 | 124.77 | 635.5 | 12.09 |
| 2006/6/5  | 72.6  | 72.5  | 73175.37 | 44663.38 | 6.46 | 78.08 | 124.3  | 643.2 | 12.3  |
| 2006/6/6  | 72.5  | 72.43 | 73175.37 | 44663.38 | 6.39 | 78.57 | 125    | 629.4 | 11.85 |
| 2006/6/7  | 70.82 | 70.9  | 73175.37 | 44663.38 | 5.97 | 78.73 | 125.36 | 627.4 | 11.89 |
| 2006/6/8  | 70.35 | 70.25 | 73175.37 | 44663.38 | 6.19 | 79.29 | 125.41 | 609.1 | 11.08 |
| 2006/6/9  | 71.63 | 71.62 | 73175.37 | 44663.38 | 6.17 | 79.42 | 125.83 | 608.2 | 11.21 |
| 2006/6/12 | 70.36 | 70.28 | 73175.37 | 44663.38 | 6.22 | 79.35 | 125.83 | 606.8 | 11.07 |
| 2006/6/13 | 68.56 | 68.48 | 73175.37 | 44663.38 | 6.16 | 79.69 | 125.57 | 562.5 | 9.63  |
| 2006/6/14 | 69.14 | 69.12 | 73175.37 | 44663.38 | 6.59 | 79.31 | 125.72 | 562.3 | 9.74  |
| 2006/6/15 | 69.5  | 69.78 | 73175.37 | 44663.38 | 7.21 | 79.08 | 125.4  | 566.5 | 9.97  |
| 2006/6/16 | 69.88 | 69.75 | 73175.37 | 44663.38 | 7.19 | 79.04 | 125.12 | 578   | 10.13 |
| 2006/6/19 | 68.98 | 69.21 | 73175.37 | 44663.38 | 6.89 | 79.42 | 125.49 | 568.8 | 9.97  |
| 2006/6/20 | 68.94 | 69.3  | 73175.37 | 44663.38 | 6.5  | 79.36 | 125.54 | 576.9 | 10.27 |
| 2006/6/21 | 70.33 | 70.07 | 73175.37 | 44663.38 | 6.59 | 79.2  | 125.54 | 587.5 | 10.42 |
| 2006/6/22 | 70.84 | 70.62 | 73175.37 | 44663.38 | 6.44 | 79.96 | 125.73 | 582.2 | 10.21 |
| 2006/6/23 | 70.87 | 70.5  | 73175.37 | 44663.38 | 6.23 | 80.4  | 126.36 | 584.8 | 10.29 |
| 2006/6/26 | 71.8  | 71.63 | 73175.37 | 44663.38 | 5.97 | 80.17 | 127.03 | 584.8 | 10.24 |
| 2006/6/27 | 71.92 | 72.05 | 73175.37 | 44663.38 | 6.11 | 80.25 | 126.94 | 581.6 | 10.2  |
| 2006/6/28 | 72.19 | 72.15 | 73175.37 | 44663.38 | 5.89 | 80.38 | 127.01 | 578.3 | 10.16 |
| 2006/6/29 | 73.52 | 73.5  | 73175.37 | 44663.38 | 6.14 | 80    | 127.18 | 588.9 | 10.33 |
| 2006/6/30 | 73.93 | 73.94 | 73175.37 | 44663.38 | 6.1  | 79.06 | 125.77 | 616   | 10.83 |
| 2006/7/5  | 75.19 | 75.2  | 74212.82 | 44056.48 | 5.77 | 79.36 | 125.26 | 616   | 10.83 |

|           |       |       |          |          |      |       |        |       |       |
|-----------|-------|-------|----------|----------|------|-------|--------|-------|-------|
| 2006/7/6  | 75.14 | 75    | 74212.82 | 44056.48 | 5.66 | 79.23 | 125.71 | 636.3 | 11.51 |
| 2006/7/7  | 74.09 | 73.76 | 74212.82 | 44056.48 | 5.52 | 78.57 | 125.76 | 634.8 | 11.33 |
| 2006/7/10 | 73.61 | 73.5  | 74212.82 | 44056.48 | 5.61 | 79.02 | 124.93 | 626.1 | 11.03 |
| 2006/7/11 | 74.16 | 74.05 | 74212.82 | 44056.48 | 5.63 | 78.93 | 125.25 | 643.1 | 11.47 |
| 2006/7/12 | 74.95 | 74.99 | 74212.82 | 44056.48 | 5.78 | 79.35 | 125.17 | 651.2 | 11.48 |
| 2006/7/13 | 76.7  | 76.7  | 74212.82 | 44056.48 | 6.13 | 78.95 | 125.72 | 654.4 | 11.41 |
| 2006/7/14 | 77.03 | 76.8  | 74212.82 | 44056.48 | 6.35 | 79.22 | 125.19 | 668   | 11.45 |
| 2006/7/17 | 75.3  | 75.7  | 74212.82 | 44056.48 | 5.78 | 80    | 125.48 | 651.9 | 11.01 |
| 2006/7/18 | 73.54 | 73.87 | 74212.82 | 44056.48 | 5.56 | 79.72 | 126.23 | 629.5 | 10.46 |
| 2006/7/19 | 72.66 | 72.79 | 74212.82 | 44056.48 | 5.86 | 79.03 | 125.7  | 642.8 | 11.06 |
| 2006/7/20 | 73.08 | 74    | 74212.82 | 44056.48 | 6.09 | 78.77 | 124.88 | 632.5 | 11.01 |
| 2006/7/21 | 74.43 | 73.52 | 74212.82 | 44056.48 | 6.14 | 78.31 | 124.85 | 620.2 | 10.79 |
| 2006/7/24 | 75.05 | 74.29 | 74212.82 | 44056.48 | 6.61 | 78.64 | 124.48 | 613.2 | 10.87 |
| 2006/7/25 | 73.75 | 73.46 | 74212.82 | 44056.48 | 6.41 | 79.11 | 124.62 | 618   | 10.9  |
| 2006/7/26 | 73.94 | 73.82 | 74212.82 | 44056.48 | 6.89 | 78.49 | 125.03 | 621.9 | 11.03 |
| 2006/7/27 | 74.54 | 74.5  | 74212.82 | 44056.48 | 7.04 | 78.34 | 124.56 | 632.5 | 11.34 |
| 2006/7/28 | 73.24 | 73.3  | 74212.82 | 44056.48 | 7.18 | 78.14 | 124.31 | 634.8 | 11.37 |
| 2006/7/31 | 74.4  | 74.56 | 74212.82 | 44056.48 | 8.21 | 77.93 | 124.54 | 634.2 | 11.37 |
| 2006/8/1  | 74.91 | 74.93 | 73931.31 | 44866.12 | 7.57 | 77.83 | 124.45 | 646.3 | 11.74 |
| 2006/8/2  | 75.81 | 76.16 | 73931.31 | 44866.12 | 7.8  | 77.78 | 123.99 | 651.6 | 12.25 |
| 2006/8/3  | 75.46 | 75.59 | 73931.31 | 44866.12 | 7.29 | 77.35 | 123.88 | 644.9 | 12.09 |
| 2006/8/4  | 74.76 | 74.78 | 73931.31 | 44866.12 | 7.25 | 76.52 | 123.34 | 644   | 12.49 |
| 2006/8/7  | 76.98 | 77.05 | 73931.31 | 44866.12 | 6.91 | 76.69 | 122.36 | 647.8 | 12.27 |
| 2006/8/8  | 76.31 | 76.29 | 73931.31 | 44866.12 | 7.16 | 76.59 | 122.26 | 645.7 | 12.26 |
| 2006/8/9  | 76.35 | 76.28 | 73931.31 | 44866.12 | 7.65 | 76.65 | 122.28 | 650.5 | 12.57 |
| 2006/8/10 | 74    | 74.17 | 73931.31 | 44866.12 | 7.53 | 77.1  | 122.44 | 634.9 | 12.11 |
| 2006/8/11 | 74.35 | 74.38 | 73931.31 | 44866.12 | 7.27 | 77.25 | 122.78 | 633.5 | 11.89 |
| 2006/8/14 | 73.53 | 73.33 | 73931.31 | 44866.12 | 6.91 | 77.3  | 122.69 | 628.5 | 12.16 |
| 2006/8/15 | 73.05 | 72.95 | 73931.31 | 44866.12 | 6.86 | 77.09 | 122.83 | 622.5 | 12.09 |
| 2006/8/16 | 71.89 | 71.64 | 73931.31 | 44866.12 | 6.77 | 76.98 | 122.8  | 628.7 | 12.29 |
| 2006/8/17 | 70.06 | 70.12 | 73931.31 | 44866.12 | 6.69 | 77.43 | 122.79 | 615.4 | 12    |
| 2006/8/18 | 71.14 | 70.93 | 73931.31 | 44866.12 | 6.73 | 77.6  | 123.49 | 612.1 | 12.03 |
| 2006/8/21 | 72.45 | 72.45 | 73931.31 | 44866.12 | 6.62 | 77.14 | 123.62 | 625.7 | 12.35 |
| 2006/8/22 | 72.63 | 72.55 | 73931.31 | 44866.12 | 7.01 | 77.34 | 123.25 | 624.6 | 12.27 |
| 2006/8/23 | 71.76 | 71.45 | 73931.31 | 44866.12 | 6.88 | 77.14 | 123.28 | 623.7 | 12.52 |
| 2006/8/24 | 72.36 | 72.02 | 73931.31 | 44866.12 | 7.08 | 77.35 | 122.89 | 619.5 | 12.31 |
| 2006/8/25 | 72.51 | 72.13 | 73931.31 | 44866.12 | 7.16 | 77.37 | 123.34 | 622   | 12.37 |
| 2006/8/28 | 70.61 | 70.47 | 73931.31 | 44866.12 | 6.47 | 77.1  | 123.03 | 615.3 | 12.03 |
| 2006/8/29 | 69.71 | 69.74 | 73931.31 | 44866.12 | 6.82 | 76.86 | 122.66 | 610.7 | 12.15 |
| 2006/8/30 | 70.03 | 70.2  | 73931.31 | 44866.12 | 6.29 | 76.68 | 122.62 | 620.2 | 12.5  |
| 2006/8/31 | 70.26 | 70.38 | 73931.31 | 44866.12 | 6.05 | 76.68 | 122.24 | 628.2 | 12.9  |
| 2006/9/1  | 69.19 | 69.24 | 73565.08 | 44793.93 | 5.88 | 77.05 | 122.32 | 626.6 | 12.96 |
| 2006/9/5  | 68.6  | 68.7  | 73565.08 | 44793.93 | 6.04 | 77.57 | 122.88 | 640.7 | 13.01 |
| 2006/9/6  | 67.5  | 67.75 | 73565.08 | 44793.93 | 5.99 | 77.91 | 123.32 | 635.6 | 13.07 |
| 2006/9/7  | 67.32 | 67.37 | 73565.08 | 44793.93 | 5.72 | 78.31 | 124.08 | 618.9 | 12.56 |
| 2006/9/8  | 66.25 | 66.3  | 73565.08 | 44793.93 | 5.68 | 78.76 | 124.29 | 611.4 | 12.16 |
| 2006/9/11 | 65.61 | 65.42 | 73565.08 | 44793.93 | 5.67 | 78.78 | 124.61 | 591.6 | 11.11 |
| 2006/9/12 | 63.76 | 63.81 | 73565.08 | 44793.93 | 5.57 | 78.4  | 124.62 | 588.5 | 11.03 |
| 2006/9/13 | 63.97 | 64.09 | 73565.08 | 44793.93 | 5.45 | 78.24 | 124.11 | 590.5 | 11.09 |
| 2006/9/14 | 63.22 | 63.27 | 73565.08 | 44793.93 | 4.89 | 77.87 | 123.83 | 580.4 | 10.84 |
| 2006/9/15 | 63.33 | 63.3  | 73565.08 | 44793.93 | 4.98 | 78.12 | 123.31 | 577.5 | 10.76 |
| 2006/9/18 | 63.8  | 63.84 | 73565.08 | 44793.93 | 4.94 | 78.11 | 123.54 | 587.2 | 11.18 |
| 2006/9/19 | 61.66 | 61.77 | 73565.08 | 44793.93 | 5.01 | 78.11 | 123.74 | 577.7 | 10.83 |
| 2006/9/20 | 60.46 | 60    | 73565.08 | 44793.93 | 4.93 | 77.82 | 123.48 | 580.8 | 11.03 |

|            |       |       |          |          |      |       |        |       |       |
|------------|-------|-------|----------|----------|------|-------|--------|-------|-------|
| 2006/9/21  | 61.59 | 61.62 | 73565.08 | 44793.93 | 4.78 | 77.22 | 123.05 | 582.9 | 11.14 |
| 2006/9/22  | 60.55 | 59.79 | 73565.08 | 44793.93 | 4.63 | 77.31 | 122.8  | 590   | 11.2  |
| 2006/9/25  | 61.45 | 60.74 | 73565.08 | 44793.93 | 4.48 | 77.31 | 122.64 | 590.4 | 11.22 |
| 2006/9/26  | 61.01 | 60.63 | 73565.08 | 44793.93 | 4.53 | 77.55 | 122.69 | 591.6 | 11.4  |
| 2006/9/27  | 62.96 | 62.96 | 73565.08 | 44793.93 | 4.2  | 77.77 | 122.83 | 597.6 | 11.6  |
| 2006/9/28  | 62.76 | 62.46 | 73565.08 | 44793.93 | 5.39 | 78.32 | 123.61 | 605   | 11.74 |
| 2006/9/29  | 62.91 | 62.9  | 73565.08 | 44793.93 | 5.62 | 78.46 | 124.16 | 598.6 | 11.54 |
| 2006/10/2  | 61.03 | 60.96 | 73900.31 | 44156.87 | 5.64 | 78.39 | 123.95 | 597.7 | 11.64 |
| 2006/10/3  | 58.68 | 58.64 | 73900.31 | 44156.87 | 5.76 | 78.34 | 123.25 | 576.3 | 11.05 |
| 2006/10/4  | 59.41 | 59.53 | 73900.31 | 44156.87 | 6    | 78.39 | 123.38 | 562   | 10.8  |
| 2006/10/5  | 60.03 | 60.02 | 73900.31 | 44156.87 | 6.3  | 78.72 | 123.17 | 571   | 11.07 |
| 2006/10/6  | 59.76 | 59.68 | 73900.31 | 44156.87 | 6.43 | 79.06 | 123.63 | 572.4 | 11.18 |
| 2006/10/9  | 59.96 | 59.93 | 73900.31 | 44156.87 | 6.43 | 79.22 | 123.65 | 578.4 | 11.42 |
| 2006/10/10 | 58.52 | 58.5  | 73900.31 | 44156.87 | 6.47 | 79.77 | 123.91 | 571.9 | 11.22 |
| 2006/10/11 | 57.59 | 57.56 | 73900.31 | 44156.87 | 6.15 | 79.75 | 124.39 | 572.3 | 11.33 |
| 2006/10/12 | 57.86 | 58.23 | 73900.31 | 44156.87 | 5.78 | 79.54 | 124.3  | 576.3 | 11.38 |
| 2006/10/13 | 58.57 | 58.69 | 73900.31 | 44156.87 | 5.66 | 79.7  | 124.13 | 588.8 | 11.68 |
| 2006/10/16 | 59.94 | 59.91 | 73900.31 | 44156.87 | 6.44 | 79.42 | 124.34 | 594.7 | 11.91 |
| 2006/10/17 | 58.93 | 58.91 | 73900.31 | 44156.87 | 6.44 | 79.01 | 123.96 | 589.7 | 11.78 |
| 2006/10/18 | 57.65 | 57.66 | 73900.31 | 44156.87 | 6.81 | 79.19 | 123.4  | 588.9 | 11.82 |
| 2006/10/19 | 58.5  | 58.55 | 73900.31 | 44156.87 | 7.13 | 78.77 | 123.61 | 599   | 12.16 |
| 2006/10/20 | 56.82 | 57.35 | 73900.31 | 44156.87 | 7.24 | 78.53 | 123.41 | 593   | 11.97 |
| 2006/10/23 | 58.81 | 56.74 | 73900.31 | 44156.87 | 6.88 | 78.97 | 123.04 | 579.7 | 11.67 |
| 2006/10/24 | 59.35 | 57.55 | 73900.31 | 44156.87 | 7.09 | 78.98 | 123.54 | 584.4 | 11.85 |
| 2006/10/25 | 61.4  | 59.09 | 73900.31 | 44156.87 | 7.69 | 78.75 | 123.33 | 587.6 | 11.89 |
| 2006/10/26 | 60.36 | 60.27 | 73900.31 | 44156.87 | 7.5  | 78.26 | 123.28 | 596.8 | 12.24 |
| 2006/10/27 | 60.75 | 60.75 | 73900.31 | 44156.87 | 7.15 | 77.91 | 122.77 | 598.2 | 12.08 |
| 2006/10/30 | 58.36 | 58.41 | 73900.31 | 44156.87 | 7.42 | 77.78 | 122.49 | 607.4 | 12.25 |
| 2006/10/31 | 58.73 | 58.72 | 73900.31 | 44156.87 | 7.53 | 77.53 | 121.77 | 606.8 | 12.27 |
| 2006/11/1  | 58.71 | 58.64 | 73465.61 | 45754.39 | 7.71 | 77.79 | 121.61 | 619.3 | 12.48 |
| 2006/11/2  | 57.88 | 57.87 | 73465.61 | 45754.39 | 7.81 | 77.8  | 121.7  | 627.8 | 12.65 |
| 2006/11/3  | 59.14 | 59.13 | 73465.61 | 45754.39 | 7.88 | 78.11 | 121.64 | 629.2 | 12.64 |
| 2006/11/6  | 60.02 | 60.11 | 73465.61 | 45754.39 | 7.49 | 78.24 | 121.64 | 627.9 | 12.76 |
| 2006/11/7  | 58.93 | 58.94 | 73465.61 | 45754.39 | 7.76 | 77.9  | 121.81 | 627.7 | 12.68 |
| 2006/11/8  | 59.83 | 59.93 | 73465.61 | 45754.39 | 7.82 | 77.92 | 121.77 | 618.3 | 12.55 |
| 2006/11/9  | 61.16 | 61.18 | 73465.61 | 45754.39 | 7.96 | 77.93 | 121.86 | 636.8 | 13.05 |
| 2006/11/10 | 59.59 | 59.66 | 73465.61 | 45754.39 | 7.79 | 77.7  | 121.95 | 630.1 | 13.12 |
| 2006/11/13 | 58.58 | 58.59 | 73465.61 | 45754.39 | 7.89 | 78.1  | 121.69 | 625.8 | 12.89 |
| 2006/11/14 | 58.28 | 58.28 | 73465.61 | 45754.39 | 7.98 | 78.34 | 122.15 | 625.3 | 12.89 |
| 2006/11/15 | 58.76 | 58.79 | 73465.61 | 45754.39 | 8.12 | 78.59 | 122.71 | 623.8 | 12.95 |
| 2006/11/16 | 56.26 | 56.23 | 73465.61 | 45754.39 | 7.76 | 78.64 | 123.11 | 621.7 | 12.95 |
| 2006/11/17 | 55.81 | 55.9  | 73465.61 | 45754.39 | 8.18 | 78.34 | 122.95 | 622.5 | 12.8  |
| 2006/11/20 | 58.8  | 56.42 | 73465.61 | 45754.39 | 8.02 | 78.24 | 122.75 | 622.1 | 12.74 |
| 2006/11/21 | 60.17 | 58.01 | 73465.61 | 45754.39 | 7.99 | 78.19 | 122.55 | 628.7 | 13.09 |
| 2006/11/22 | 59.24 | 57.28 | 73465.61 | 45754.39 | 7.72 | 77.55 | 122.42 | 629   | 13.04 |
| 2006/11/27 | 60.32 | 60.3  | 73465.61 | 45754.39 | 8    | 76.62 | 121.3  | 640.6 | 13.49 |
| 2006/11/28 | 60.99 | 60.97 | 73465.61 | 45754.39 | 8.32 | 76.08 | 121.28 | 637.3 | 13.62 |
| 2006/11/29 | 62.46 | 62.45 | 73465.61 | 45754.39 | 8.87 | 76.28 | 120.62 | 635.5 | 13.57 |
| 2006/11/30 | 63.13 | 62.97 | 73465.61 | 45754.39 | 8.84 | 75.52 | 120.4  | 646.9 | 13.93 |
| 2006/12/1  | 63.43 | 63.43 | 73387.02 | 45386.77 | 8.42 | 75.31 | 119.45 | 644.7 | 14.01 |
| 2006/12/4  | 62.44 | 62.39 | 73387.02 | 45386.77 | 7.81 | 75.29 | 119.31 | 645.2 | 14.06 |
| 2006/12/5  | 62.43 | 62.4  | 73387.02 | 45386.77 | 7.69 | 75.6  | 119.39 | 642.3 | 13.85 |
| 2006/12/6  | 62.19 | 62.2  | 73387.02 | 45386.77 | 7.73 | 75.86 | 119.77 | 630.5 | 13.62 |
| 2006/12/7  | 62.49 | 62.54 | 73387.02 | 45386.77 | 7.67 | 75.99 | 119.92 | 631.9 | 13.86 |

|            |       |       |          |          |      |       |        |       |       |
|------------|-------|-------|----------|----------|------|-------|--------|-------|-------|
| 2006/12/8  | 62.03 | 62.06 | 73387.02 | 45386.77 | 7.56 | 76.32 | 120.22 | 626.1 | 13.72 |
| 2006/12/11 | 61.22 | 61.26 | 73387.02 | 45386.77 | 7.43 | 76.2  | 120.49 | 630   | 13.85 |
| 2006/12/12 | 61.02 | 61.06 | 73387.02 | 45386.77 | 7.43 | 75.68 | 120.09 | 627   | 13.81 |
| 2006/12/13 | 61.37 | 61.34 | 73387.02 | 45386.77 | 7.67 | 75.85 | 119.75 | 627.9 | 13.75 |
| 2006/12/14 | 62.51 | 62.48 | 73387.02 | 45386.77 | 7.56 | 76.1  | 119.72 | 626.6 | 13.79 |
| 2006/12/15 | 63.43 | 63.4  | 73387.02 | 45386.77 | 7.41 | 76.42 | 119.76 | 615   | 12.82 |
| 2006/12/18 | 62.21 | 62.19 | 73387.02 | 45386.77 | 7.08 | 76.59 | 119.89 | 614   | 12.38 |
| 2006/12/19 | 63.15 | 62.87 | 73387.02 | 45386.77 | 7.08 | 75.75 | 120.26 | 621.6 | 12.57 |
| 2006/12/20 | 63.72 | 63.08 | 73387.02 | 45386.77 | 6.77 | 75.93 | 119.31 | 620.6 | 12.51 |
| 2006/12/21 | 62.66 | 62.05 | 73387.02 | 45386.77 | 6.8  | 76.06 | 119.66 | 618.2 | 12.36 |
| 2006/12/22 | 62.41 | 61.81 | 73387.02 | 45386.77 | 6.64 | 76.12 | 119.85 | 619.1 | 12.51 |
| 2006/12/26 | 61.1  | 61.07 | 73387.02 | 45386.77 | 6.11 | 76.35 | 119.81 | 623.7 | 12.6  |
| 2006/12/27 | 60.34 | 60.31 | 73387.02 | 45386.77 | 5.84 | 76.25 | 119.83 | 627.2 | 12.8  |
| 2006/12/28 | 60.53 | 60.39 | 73387.02 | 45386.77 | 6.25 | 75.99 | 119.83 | 636.9 | 12.82 |
| 2006/12/29 | 61.05 | 60.85 | 73387.02 | 45386.77 | 6.3  | 76.17 | 119.49 | 638   | 12.82 |
| 2007/1/3   | 58.32 | 58.31 | 73039.34 | 45138.03 | 6.16 | 75.56 | 119.49 | 629.8 | 12.56 |
| 2007/1/4   | 55.59 | 55.65 | 73039.34 | 45138.03 | 6.16 | 75.89 | 119.49 | 626.2 | 12.73 |
| 2007/1/5   | 56.31 | 56.29 | 73039.34 | 45138.03 | 6.18 | 76.38 | 119.49 | 606.9 | 12.13 |
| 2007/1/8   | 56.09 | 56.08 | 73039.34 | 45138.03 | 6.38 | 76.08 | 119.49 | 609.4 | 12.26 |
| 2007/1/9   | 55.64 | 55.65 | 73039.34 | 45138.03 | 6.63 | 76.02 | 117.42 | 615   | 12.5  |
| 2007/1/10  | 54.02 | 53.95 | 73039.34 | 45138.03 | 6.76 | 76.31 | 117.43 | 613.4 | 12.35 |
| 2007/1/11  | 51.88 | 51.91 | 73039.34 | 45138.03 | 6.29 | 75.8  | 117.56 | 613.9 | 12.38 |
| 2007/1/12  | 52.99 | 52.96 | 73039.34 | 45138.03 | 6.6  | 75.3  | 116.54 | 626.9 | 12.8  |
| 2007/1/16  | 51.21 | 51.23 | 73039.34 | 45138.03 | 6.64 | 75.18 | 115.48 | 625.9 | 12.54 |
| 2007/1/17  | 52.24 | 52.3  | 73039.34 | 45138.03 | 6.23 | 74.85 | 115.65 | 633.3 | 12.81 |
| 2007/1/18  | 50.48 | 50.51 | 73039.34 | 45138.03 | 6.32 | 74.67 | 115.14 | 628.1 | 12.61 |
| 2007/1/19  | 51.99 | 51.98 | 73039.34 | 45138.03 | 6.89 | 74.71 | 115.2  | 636.1 | 12.85 |
| 2007/1/22  | 51.13 | 51.11 | 73039.34 | 45138.03 | 7.32 | 74.61 | 115.17 | 634.1 | 12.93 |
| 2007/1/23  | 55.04 | 53.61 | 73039.34 | 45138.03 | 7.6  | 74.42 | 114.94 | 645.9 | 13.19 |
| 2007/1/24  | 55.37 | 54.24 | 73039.34 | 45138.03 | 7.42 | 74.88 | 115.16 | 648.2 | 13.2  |
| 2007/1/25  | 54.23 | 53.49 | 73039.34 | 45138.03 | 6.91 | 75.05 | 115.75 | 648.1 | 13.42 |
| 2007/1/26  | 55.42 | 55.38 | 73039.34 | 45138.03 | 7.18 | 75.29 | 115.54 | 644.7 | 13.31 |
| 2007/1/29  | 54.01 | 54.01 | 73039.34 | 45138.03 | 6.92 | 75.19 | 115.95 | 643.2 | 13.19 |
| 2007/1/30  | 56.97 | 57.03 | 73039.34 | 45138.03 | 7.74 | 75.12 | 115.8  | 644.2 | 13.38 |
| 2007/1/31  | 58.14 | 58.17 | 73039.34 | 45138.03 | 7.67 | 75.04 | 115.17 | 652   | 13.57 |
| 2007/2/1   | 57.3  | 57.35 | 73352.19 | 46504.01 | 7.53 | 74.93 | 115.23 | 657.4 | 13.73 |
| 2007/2/2   | 59.02 | 59.01 | 73352.19 | 46504.01 | 7.48 | 74.96 | 115.12 | 646.2 | 13.38 |
| 2007/2/5   | 58.74 | 58.69 | 73352.19 | 46504.01 | 7.63 | 75.18 | 115.05 | 650.9 | 13.56 |
| 2007/2/6   | 58.88 | 58.91 | 73352.19 | 46504.01 | 7.62 | 74.77 | 115.16 | 653.6 | 13.68 |
| 2007/2/7   | 57.71 | 57.75 | 73352.19 | 46504.01 | 7.71 | 74.8  | 114.84 | 652.3 | 13.71 |
| 2007/2/8   | 59.71 | 59.76 | 73352.19 | 46504.01 | 7.87 | 75.25 | 115.3  | 658   | 13.77 |
| 2007/2/9   | 59.89 | 59.86 | 73352.19 | 46504.01 | 7.83 | 75.56 | 116.44 | 667.5 | 13.89 |
| 2007/2/12  | 57.81 | 57.76 | 73352.19 | 46504.01 | 7.23 | 75.68 | 116.49 | 662.6 | 13.72 |
| 2007/2/13  | 59.06 | 58.98 | 73352.19 | 46504.01 | 7.37 | 75.7  | 116.66 | 663.9 | 13.92 |
| 2007/2/14  | 58    | 58    | 73352.19 | 46504.01 | 7.24 | 75.09 | 116.98 | 667.4 | 13.97 |
| 2007/2/15  | 57.99 | 57.92 | 73352.19 | 46504.01 | 7.29 | 75.53 | 116.23 | 667.3 | 13.96 |
| 2007/2/16  | 59.39 | 59.38 | 73352.19 | 46504.01 | 7.5  | 75.57 | 117.04 | 668.8 | 13.99 |
| 2007/2/20  | 58.07 | 58.32 | 73352.19 | 46504.01 | 7.59 | 75.38 | 117.23 | 657.1 | 13.83 |
| 2007/2/21  | 60.07 | 59.4  | 73352.19 | 46504.01 | 7.65 | 75.42 | 116.94 | 680.2 | 14.27 |
| 2007/2/22  | 60.95 | 60.28 | 73352.19 | 46504.01 | 7.73 | 75.33 | 116.99 | 679.4 | 14.25 |
| 2007/2/23  | 61.14 | 60.28 | 73352.19 | 46504.01 | 7.76 | 75.05 | 116.99 | 682   | 14.57 |
| 2007/2/26  | 61.39 | 61.41 | 73352.19 | 46504.01 | 7.55 | 75.07 | 116.67 | 686.5 | 14.69 |
| 2007/2/27  | 61.46 | 61.46 | 73352.19 | 46504.01 | 7.53 | 75.12 | 116.83 | 687.2 | 14.55 |
| 2007/2/28  | 61.79 | 61.78 | 73352.19 | 46504.01 | 7.3  | 75.06 | 116.95 | 672.5 | 14.1  |

|           |       |       |          |          |      |       |        |       |       |
|-----------|-------|-------|----------|----------|------|-------|--------|-------|-------|
| 2007/3/1  | 62    | 61.97 | 73346.25 | 45362.31 | 7.29 | 74.95 | 117.01 | 665.1 | 13.53 |
| 2007/3/2  | 61.64 | 61.58 | 73346.25 | 45362.31 | 7.24 | 75.52 | 117.09 | 644.4 | 12.88 |
| 2007/3/5  | 60.07 | 60.05 | 73346.25 | 45362.31 | 7.25 | 76.44 | 118.78 | 639.2 | 12.64 |
| 2007/3/6  | 60.69 | 60.66 | 73346.25 | 45362.31 | 7.47 | 75.98 | 118.52 | 646.2 | 12.88 |
| 2007/3/7  | 61.82 | 61.85 | 73346.25 | 45362.31 | 7.37 | 75.94 | 118.35 | 652.9 | 13    |
| 2007/3/8  | 61.64 | 61.63 | 73346.25 | 45362.31 | 7.24 | 76.13 | 118.35 | 655.5 | 13.02 |
| 2007/3/9  | 60.05 | 60.06 | 73346.25 | 45362.31 | 7.08 | 75.97 | 118.29 | 652   | 12.87 |
| 2007/3/12 | 58.91 | 58.94 | 73346.25 | 45362.31 | 6.91 | 75.95 | 117.93 | 650.3 | 12.99 |
| 2007/3/13 | 57.93 | 58.03 | 73346.25 | 45362.31 | 6.89 | 76.1  | 118.61 | 649.4 | 12.86 |
| 2007/3/14 | 58.16 | 58.15 | 73346.25 | 45362.31 | 7.08 | 75.85 | 119.06 | 642.5 | 12.74 |
| 2007/3/15 | 57.55 | 57.52 | 73346.25 | 45362.31 | 6.96 | 75.8  | 118.52 | 647.1 | 12.99 |
| 2007/3/16 | 57.11 | 57.06 | 73346.25 | 45362.31 | 6.92 | 75.6  | 118.57 | 653.9 | 13.13 |
| 2007/3/19 | 56.59 | 56.65 | 73346.25 | 45362.31 | 6.85 | 75.48 | 118.51 | 654.3 | 13.15 |
| 2007/3/20 | 56.73 | 56.41 | 73346.25 | 45362.31 | 6.91 | 74.82 | 118.22 | 659   | 13.29 |
| 2007/3/21 | 59.61 | 56.98 | 73346.25 | 45362.31 | 7.16 | 74.58 | 117.22 | 660   | 13.24 |
| 2007/3/22 | 61.69 | 60.21 | 73346.25 | 45362.31 | 7.32 | 74.72 | 117.25 | 664.2 | 13.4  |
| 2007/3/23 | 62.28 | 61.07 | 73346.25 | 45362.31 | 7.27 | 74.81 | 117.15 | 657.3 | 13.15 |
| 2007/3/26 | 62.91 | 61.77 | 73346.25 | 45362.31 | 7.25 | 74.53 | 117.06 | 663.9 | 13.34 |
| 2007/3/27 | 62.93 | 62.98 | 73346.25 | 45362.31 | 7.5  | 74.68 | 116.94 | 662.5 | 13.21 |
| 2007/3/28 | 64.08 | 64.11 | 73346.25 | 45362.31 | 7.56 | 74.83 | 117.34 | 666.8 | 13.39 |
| 2007/3/29 | 66.03 | 66.1  | 73346.25 | 45362.31 | 7.61 | 74.81 | 117.2  | 661.5 | 13.34 |
| 2007/3/30 | 65.87 | 65.94 | 73346.25 | 45362.31 | 7.73 | 74.6  | 117.33 | 663   | 13.45 |
| 2007/4/2  | 65.94 | 66.03 | 73553.29 | 44682.25 | 7.67 | 73.93 | 116.63 | 665.7 | 13.35 |
| 2007/4/3  | 64.64 | 64.59 | 73553.29 | 44682.25 | 7.43 | 74.05 | 116.18 | 664   | 13.43 |
| 2007/4/4  | 64.38 | 64.4  | 73553.29 | 44682.25 | 7.52 | 73.97 | 116.28 | 672.1 | 13.62 |
| 2007/4/5  | 64.28 | 64.26 | 73553.29 | 44682.25 | 7.61 | 74.16 | 116.32 | 674.2 | 13.74 |
| 2007/4/9  | 61.51 | 61.51 | 73553.29 | 44682.25 | 7.55 | 74.5  | 116.93 | 671.9 | 13.81 |
| 2007/4/10 | 61.89 | 61.92 | 73553.29 | 44682.25 | 7.87 | 74.14 | 116.99 | 676.5 | 13.93 |
| 2007/4/11 | 62.01 | 61.98 | 73553.29 | 44682.25 | 7.86 | 74.01 | 116.5  | 676.8 | 13.89 |
| 2007/4/12 | 63.85 | 63.87 | 73553.29 | 44682.25 | 7.92 | 73.86 | 116.78 | 675.1 | 13.86 |
| 2007/4/13 | 63.63 | 63.63 | 73553.29 | 44682.25 | 7.8  | 73.6  | 116.52 | 685.4 | 14.09 |
| 2007/4/16 | 63.61 | 63.63 | 73553.29 | 44682.25 | 7.53 | 73.49 | 116.42 | 690.1 | 14.08 |
| 2007/4/17 | 63.1  | 63.14 | 73553.29 | 44682.25 | 7.42 | 72.83 | 116.2  | 688.2 | 14.02 |
| 2007/4/18 | 63.13 | 63.14 | 73553.29 | 44682.25 | 7.5  | 72.78 | 115.4  | 689.1 | 13.98 |
| 2007/4/19 | 61.83 | 61.81 | 73553.29 | 44682.25 | 7.49 | 73    | 115.67 | 684.3 | 13.74 |
| 2007/4/20 | 63.38 | 63.56 | 73553.29 | 44682.25 | 7.38 | 73.01 | 115.86 | 692   | 13.96 |
| 2007/4/23 | 65.89 | 65.33 | 73553.29 | 44682.25 | 7.56 | 73.07 | 115.75 | 690.6 | 14.05 |
| 2007/4/24 | 64.58 | 64.1  | 73553.29 | 44682.25 | 7.6  | 73.02 | 115.97 | 684.2 | 13.78 |
| 2007/4/25 | 65.84 | 65.33 | 73553.29 | 44682.25 | 7.69 | 73.02 | 115.94 | 684.1 | 13.77 |
| 2007/4/26 | 65.06 | 65.08 | 73553.29 | 44682.25 | 7.51 | 73.44 | 115.86 | 674.9 | 13.33 |
| 2007/4/27 | 66.46 | 66.45 | 73553.29 | 44682.25 | 7.83 | 73.19 | 116.57 | 681.8 | 13.44 |
| 2007/4/30 | 65.71 | 65.78 | 73553.29 | 44682.25 | 7.86 | 73.12 | 116.57 | 683.5 | 13.45 |
| 2007/5/1  | 64.4  | 64.43 | 73010.59 | 43787.17 | 7.72 | 72.87 | 116.57 | 677.3 | 13.25 |
| 2007/5/2  | 63.68 | 63.78 | 73010.59 | 43787.17 | 7.73 | 73.24 | 115.7  | 675.1 | 13.21 |
| 2007/5/3  | 63.19 | 63.23 | 73010.59 | 43787.17 | 7.95 | 73.3  | 116.08 | 684.4 | 13.39 |
| 2007/5/4  | 61.93 | 61.89 | 73010.59 | 43787.17 | 7.94 | 73.11 | 116.11 | 689.7 | 13.42 |
| 2007/5/7  | 61.47 | 61.48 | 73010.59 | 43787.17 | 7.78 | 73.09 | 115.74 | 690.4 | 13.53 |
| 2007/5/8  | 62.26 | 62.26 | 73010.59 | 43787.17 | 7.64 | 73.23 | 115.81 | 687.4 | 13.49 |
| 2007/5/9  | 61.55 | 61.54 | 73010.59 | 43787.17 | 7.72 | 73.06 | 115.81 | 682.5 | 13.36 |
| 2007/5/10 | 61.81 | 61.85 | 73010.59 | 43787.17 | 7.73 | 73.64 | 115.59 | 667   | 13.04 |
| 2007/5/11 | 62.37 | 62.35 | 73010.59 | 43787.17 | 7.9  | 73.51 | 116.18 | 672.3 | 13.21 |
| 2007/5/14 | 62.46 | 62.55 | 73010.59 | 43787.17 | 7.95 | 73.6  | 116.17 | 670.1 | 13.14 |
| 2007/5/15 | 63.17 | 63.16 | 73010.59 | 43787.17 | 7.86 | 73.35 | 116.49 | 674.5 | 13.23 |
| 2007/5/16 | 62.55 | 62.57 | 73010.59 | 43787.17 | 7.89 | 73.67 | 116.32 | 661.5 | 12.84 |



|           |       |       |          |          |      |       |        |       |       |
|-----------|-------|-------|----------|----------|------|-------|--------|-------|-------|
| 2007/5/17 | 64.86 | 64.83 | 73010.59 | 43787.17 | 8.08 | 73.74 | 116.53 | 657.2 | 12.81 |
| 2007/5/18 | 64.94 | 64.93 | 73010.59 | 43787.17 | 7.94 | 73.76 | 116.57 | 662   | 12.93 |
| 2007/5/21 | 66.27 | 66.25 | 73010.59 | 43787.17 | 7.91 | 73.91 | 116.63 | 663.8 | 13.06 |
| 2007/5/22 | 64.97 | 64.91 | 73010.59 | 43787.17 | 7.8  | 73.76 | 116.51 | 659.9 | 12.92 |
| 2007/5/23 | 65.77 | 65.1  | 73010.59 | 43787.17 | 7.76 | 73.34 | 116.29 | 662.6 | 13.04 |
| 2007/5/24 | 64.18 | 63.62 | 73010.59 | 43787.17 | 7.68 | 73.39 | 115.6  | 653.3 | 12.85 |
| 2007/5/25 | 65.2  | 64.59 | 73010.59 | 43787.17 | 7.64 | 73.4  | 115.59 | 655.3 | 12.94 |
| 2007/5/29 | 63.15 | 63.19 | 73010.59 | 43787.17 | 7.59 | 73.52 | 115.64 | 657.2 | 13.16 |
| 2007/5/30 | 63.49 | 63.47 | 73010.59 | 43787.17 | 7.94 | 73.72 | 115.94 | 652.5 | 13.22 |
| 2007/5/31 | 64.01 | 64.02 | 73010.59 | 43787.17 | 7.94 | 73.55 | 115.45 | 661   | 13.47 |
| 2007/6/1  | 65.08 | 65.09 | 72619.6  | 44734.44 | 7.88 | 73.51 | 115.24 | 671.2 | 13.74 |
| 2007/6/4  | 66.21 | 66.17 | 72619.6  | 44734.44 | 8.19 | 73.18 | 115.01 | 670.7 | 13.75 |
| 2007/6/5  | 65.61 | 65.63 | 72619.6  | 44734.44 | 8.06 | 73.11 | 114.68 | 669.6 | 13.81 |
| 2007/6/6  | 65.96 | 65.97 | 72619.6  | 44734.44 | 8.08 | 73.14 | 114.68 | 669.3 | 13.72 |
| 2007/6/7  | 66.93 | 66.93 | 72619.6  | 44734.44 | 7.83 | 73.68 | 114.63 | 660.1 | 13.48 |
| 2007/6/8  | 64.76 | 64.78 | 72619.6  | 44734.44 | 7.66 | 74.04 | 115.19 | 645.5 | 13.04 |
| 2007/6/11 | 65.97 | 65.93 | 72619.6  | 44734.44 | 7.61 | 73.99 | 115.19 | 654.3 | 13.28 |
| 2007/6/12 | 65.35 | 65.36 | 72619.6  | 44734.44 | 7.68 | 73.82 | 115.19 | 648.5 | 13.09 |
| 2007/6/13 | 66.26 | 66.17 | 72619.6  | 44734.44 | 7.61 | 73.86 | 114.86 | 648.2 | 13.06 |
| 2007/6/14 | 67.65 | 67.62 | 72619.6  | 44734.44 | 7.81 | 73.99 | 114.98 | 651.6 | 13.17 |
| 2007/6/15 | 68    | 68.04 | 72619.6  | 44734.44 | 7.92 | 73.79 | 115.19 | 654.5 | 13.26 |
| 2007/6/18 | 69.09 | 69.06 | 72619.6  | 44734.44 | 7.69 | 73.48 | 114.98 | 655.8 | 13.24 |
| 2007/6/19 | 69.1  | 69.15 | 72619.6  | 44734.44 | 7.52 | 73.31 | 114.72 | 660.7 | 13.33 |
| 2007/6/20 | 68.19 | 68.5  | 72619.6  | 44734.44 | 7.39 | 73.13 | 114.52 | 656.1 | 13.25 |
| 2007/6/21 | 68.65 | 68.35 | 72619.6  | 44734.44 | 7.35 | 73.16 | 114.19 | 650.6 | 13.09 |
| 2007/6/22 | 69.14 | 68.85 | 72619.6  | 44734.44 | 7.13 | 72.91 | 114.15 | 653.5 | 13.02 |
| 2007/6/25 | 69.18 | 68.83 | 72619.6  | 44734.44 | 6.94 | 72.94 | 114.06 | 651.3 | 12.88 |
| 2007/6/26 | 67.77 | 67.78 | 72619.6  | 44734.44 | 6.88 | 72.92 | 114.65 | 642.1 | 12.28 |
| 2007/6/27 | 68.97 | 68.98 | 72619.6  | 44734.44 | 6.93 | 72.91 | 114.64 | 641.7 | 12.21 |
| 2007/6/28 | 69.57 | 69.61 | 72619.6  | 44734.44 | 6.66 | 72.78 | 114.43 | 650.4 | 12.38 |
| 2007/6/29 | 70.68 | 70.47 | 72619.6  | 44734.44 | 6.77 | 72.56 | 114.16 | 650.9 | 12.35 |
| 2007/7/2  | 71.09 | 71.11 | 73211.71 | 44738.9  | 6.76 | 71.79 | 112.48 | 659.2 | 12.62 |
| 2007/7/3  | 71.41 | 71.41 | 73211.71 | 44738.9  | 6.75 | 71.84 | 112.42 | 655.4 | 12.57 |
| 2007/7/5  | 71.81 | 71.81 | 73211.71 | 44738.9  | 6.62 | 72.03 | 112.42 | 650.6 | 12.47 |
| 2007/7/6  | 72.81 | 72.8  | 73211.71 | 44738.9  | 6.44 | 72.04 | 112.56 | 654.8 | 12.65 |
| 2007/7/9  | 72.19 | 72.14 | 73211.71 | 44738.9  | 6.41 | 71.88 | 112.57 | 662.5 | 12.71 |
| 2007/7/10 | 72.81 | 72.8  | 73211.71 | 44738.9  | 6.7  | 71.45 | 112.64 | 664.4 | 12.87 |
| 2007/7/11 | 72.56 | 72.58 | 73211.71 | 44738.9  | 6.6  | 71.31 | 112.37 | 662.1 | 12.87 |
| 2007/7/12 | 72.5  | 72.55 | 73211.71 | 44738.9  | 6.5  | 71.37 | 112.25 | 668.3 | 13.08 |
| 2007/7/13 | 73.93 | 73.89 | 73211.71 | 44738.9  | 6.66 | 71.21 | 112.49 | 667.3 | 13.01 |
| 2007/7/16 | 74.15 | 74.11 | 73211.71 | 44738.9  | 6.38 | 71.15 | 112.21 | 666.3 | 12.97 |
| 2007/7/17 | 74.02 | 74.03 | 73211.71 | 44738.9  | 6.31 | 70.78 | 112.23 | 665.9 | 12.92 |
| 2007/7/18 | 75.05 | 75.03 | 73211.71 | 44738.9  | 6.53 | 70.57 | 111.43 | 673.7 | 13.2  |
| 2007/7/19 | 75.92 | 75.9  | 73211.71 | 44738.9  | 6.71 | 70.69 | 111.56 | 678.1 | 13.29 |
| 2007/7/20 | 75.57 | 75.53 | 73211.71 | 44738.9  | 6.45 | 70.48 | 111.74 | 684.7 | 13.32 |
| 2007/7/23 | 74.89 | 74.65 | 73211.71 | 44738.9  | 6.04 | 70.4  | 111.27 | 681.5 | 13.24 |
| 2007/7/24 | 73.56 | 73.38 | 73211.71 | 44738.9  | 5.86 | 70.31 | 111    | 684.8 | 13.36 |
| 2007/7/25 | 75.88 | 75.74 | 73211.71 | 44738.9  | 5.93 | 70.59 | 111.21 | 673.8 | 13.07 |
| 2007/7/26 | 74.95 | 74.96 | 73211.71 | 44738.9  | 5.94 | 70.83 | 111.33 | 662.8 | 12.88 |
| 2007/7/27 | 77.02 | 77.03 | 73211.71 | 44738.9  | 6.11 | 71.55 | 111.83 | 660.1 | 12.64 |
| 2007/7/30 | 76.83 | 76.82 | 73211.71 | 44738.9  | 6.5  | 71.53 | 112.39 | 664.1 | 12.9  |
| 2007/7/31 | 78.21 | 78.2  | 73211.71 | 44738.9  | 6.19 | 71.39 | 112.66 | 666.9 | 13.02 |
| 2007/8/1  | 76.53 | 76.49 | 72591.27 | 45013.82 | 6.35 | 71.7  | 112.66 | 663.6 | 12.96 |
| 2007/8/2  | 76.86 | 76.84 | 72591.27 | 45013.82 | 6.11 | 71.52 | 112.27 | 664.6 | 13    |

|            |       |       |          |          |      |       |        |       |       |
|------------|-------|-------|----------|----------|------|-------|--------|-------|-------|
| 2007/8/3   | 75.48 | 75.41 | 72591.27 | 45013.82 | 6.09 | 71.46 | 112.15 | 672.5 | 13.16 |
| 2007/8/6   | 72.06 | 72.03 | 72591.27 | 45013.82 | 6.21 | 71.72 | 112.23 | 671.5 | 13.03 |
| 2007/8/7   | 72.42 | 72.25 | 72591.27 | 45013.82 | 6.2  | 72.03 | 112.83 | 670.6 | 13.1  |
| 2007/8/8   | 72.15 | 72.23 | 72591.27 | 45013.82 | 6.22 | 71.56 | 113.28 | 674.5 | 13.17 |
| 2007/8/9   | 71.59 | 71.62 | 72591.27 | 45013.82 | 6.59 | 72    | 112.93 | 661.4 | 12.71 |
| 2007/8/10  | 71.47 | 71.49 | 72591.27 | 45013.82 | 6.82 | 71.98 | 113.35 | 670.3 | 12.87 |
| 2007/8/13  | 71.62 | 71.6  | 72591.27 | 45013.82 | 6.79 | 72.42 | 113.34 | 669.7 | 12.86 |
| 2007/8/14  | 72.38 | 72.4  | 72591.27 | 45013.82 | 6.94 | 72.96 | 113.63 | 668.6 | 12.75 |
| 2007/8/15  | 73.33 | 73.36 | 72591.27 | 45013.82 | 6.86 | 73.35 | 114.43 | 668.9 | 12.56 |
| 2007/8/16  | 71    | 70.99 | 72591.27 | 45013.82 | 6.88 | 73.41 | 114.23 | 648.3 | 11.5  |
| 2007/8/17  | 71.98 | 71.9  | 72591.27 | 45013.82 | 7.01 | 73.52 | 114.46 | 656.9 | 11.8  |
| 2007/8/20  | 71.12 | 71.12 | 72591.27 | 45013.82 | 6.04 | 73.29 | 114.24 | 656.7 | 11.74 |
| 2007/8/21  | 69.47 | 69.49 | 72591.27 | 45013.82 | 5.82 | 73.52 | 113.9  | 656.7 | 11.51 |
| 2007/8/22  | 69.26 | 69.3  | 72591.27 | 45013.82 | 5.58 | 73.08 | 113.9  | 659.1 | 11.57 |
| 2007/8/23  | 69.83 | 69.86 | 72591.27 | 45013.82 | 5.62 | 72.64 | 113.68 | 658.9 | 11.64 |
| 2007/8/24  | 71.09 | 71.17 | 72591.27 | 45013.82 | 5.52 | 72.32 | 113.11 | 668   | 11.94 |
| 2007/8/27  | 71.97 | 71.98 | 72591.27 | 45013.82 | 5.38 | 72.46 | 112.7  | 666.8 | 11.77 |
| 2007/8/28  | 71.73 | 71.79 | 72591.27 | 45013.82 | 5.59 | 72.85 | 113.33 | 664.4 | 11.77 |
| 2007/8/29  | 73.51 | 73.52 | 72591.27 | 45013.82 | 5.43 | 72.2  | 113.15 | 666.3 | 11.85 |
| 2007/8/30  | 73.36 | 73.37 | 72591.27 | 45013.82 | 5.64 | 72.36 | 112.93 | 668   | 11.79 |
| 2007/8/31  | 74.04 | 73.98 | 72591.27 | 45013.82 | 5.47 | 72.24 | 112.21 | 675.8 | 12.06 |
| 2007/9/4   | 75.08 | 75.07 | 73245.77 | 44646.97 | 5.63 | 72.23 | 112.2  | 685.2 | 12.28 |
| 2007/9/5   | 75.73 | 75.74 | 73245.77 | 44646.97 | 5.81 | 72.02 | 112.5  | 684.3 | 12.19 |
| 2007/9/6   | 76.3  | 76.34 | 73245.77 | 44646.97 | 5.65 | 71.88 | 111.82 | 698.1 | 12.37 |
| 2007/9/7   | 76.7  | 76.7  | 73245.77 | 44646.97 | 5.5  | 71.64 | 111.81 | 703.2 | 12.59 |
| 2007/9/10  | 77.49 | 77.53 | 73245.77 | 44646.97 | 5.89 | 71.74 | 111.68 | 705.6 | 12.53 |
| 2007/9/11  | 78.23 | 78.16 | 73245.77 | 44646.97 | 5.93 | 71.57 | 112.12 | 714.4 | 12.67 |
| 2007/9/12  | 79.91 | 79.85 | 73245.77 | 44646.97 | 6.44 | 71.67 | 112.14 | 714   | 12.63 |
| 2007/9/13  | 80.09 | 80.05 | 73245.77 | 44646.97 | 6.03 | 72.04 | 112.71 | 711.2 | 12.51 |
| 2007/9/14  | 79.1  | 79.14 | 73245.77 | 44646.97 | 6.28 | 72.4  | 113.18 | 711.1 | 12.54 |
| 2007/9/17  | 80.57 | 80.55 | 73245.77 | 44646.97 | 6.65 | 72.96 | 114.22 | 717.1 | 12.74 |
| 2007/9/18  | 81.51 | 81.51 | 73245.77 | 44646.97 | 6.57 | 72.26 | 114.92 | 717   | 12.77 |
| 2007/9/19  | 81.93 | 81.99 | 73245.77 | 44646.97 | 6.18 | 72.74 | 114.24 | 723   | 12.96 |
| 2007/9/20  | 83.32 | 83.85 | 73245.77 | 44646.97 | 6.01 | 72.4  | 115.38 | 733.2 | 13.32 |
| 2007/9/21  | 81.62 | 83.38 | 73245.77 | 44646.97 | 6.08 | 72.01 | 115.08 | 732.1 | 13.47 |
| 2007/9/24  | 80.95 | 82.51 | 73245.77 | 44646.97 | 6.37 | 71.95 | 114.23 | 732.5 | 13.5  |
| 2007/9/25  | 79.53 | 81.2  | 73245.77 | 44646.97 | 6.36 | 72.06 | 115.07 | 732   | 13.48 |
| 2007/9/26  | 80.3  | 80.31 | 73245.77 | 44646.97 | 6.42 | 72.16 | 115.04 | 728.6 | 13.42 |
| 2007/9/27  | 82.88 | 82.86 | 73245.77 | 44646.97 | 6.92 | 71.76 | 114.89 | 732.7 | 13.65 |
| 2007/9/28  | 81.66 | 81.64 | 73245.77 | 44646.97 | 6.87 | 71.06 | 114.93 | 742.8 | 13.92 |
| 2007/10/1  | 80.24 | 80.31 | 73972.65 | 44778.38 | 7.05 | 71.39 | 112.56 | 747.2 | 13.86 |
| 2007/10/2  | 80.05 | 80    | 73972.65 | 44778.38 | 7.43 | 71.47 | 112.72 | 729.8 | 13.45 |
| 2007/10/3  | 79.94 | 79.97 | 73972.65 | 44778.38 | 7.28 | 71.78 | 112.68 | 729.3 | 13.47 |
| 2007/10/4  | 81.44 | 81.48 | 73972.65 | 44778.38 | 7.41 | 71.54 | 112.96 | 737.8 | 13.5  |
| 2007/10/5  | 81.22 | 81.2  | 73972.65 | 44778.38 | 7.07 | 71.41 | 112.67 | 741.3 | 13.49 |
| 2007/10/8  | 79.02 | 78.97 | 73972.65 | 44778.38 | 6.85 | 71.59 | 112.57 | 732.8 | 13.36 |
| 2007/10/9  | 80.26 | 80.23 | 73972.65 | 44778.38 | 6.86 | 71.6  | 112.5  | 737.4 | 13.58 |
| 2007/10/10 | 81.3  | 81.3  | 73972.65 | 44778.38 | 7.01 | 71.43 | 112.54 | 740.4 | 13.67 |
| 2007/10/11 | 83.08 | 83.05 | 73972.65 | 44778.38 | 6.88 | 71.72 | 112.73 | 751.3 | 13.99 |
| 2007/10/12 | 83.69 | 83.73 | 73972.65 | 44778.38 | 6.97 | 71.62 | 113.42 | 748.7 | 13.9  |
| 2007/10/15 | 86.13 | 86.19 | 73972.65 | 44778.38 | 7.45 | 71.39 | 113.02 | 757.9 | 13.86 |
| 2007/10/16 | 87.61 | 87.58 | 73972.65 | 44778.38 | 7.37 | 71.76 | 112.81 | 760.2 | 13.66 |
| 2007/10/17 | 87.4  | 87.19 | 73972.65 | 44778.38 | 7.46 | 71.45 | 113.17 | 757.5 | 13.75 |
| 2007/10/18 | 89.47 | 89.48 | 73972.65 | 44778.38 | 7.37 | 71.4  | 112.87 | 764.1 | 13.8  |

|            |       |       |          |          |      |       |        |       |       |
|------------|-------|-------|----------|----------|------|-------|--------|-------|-------|
| 2007/10/19 | 88.6  | 88.58 | 73972.65 | 44778.38 | 7.04 | 71.1  | 112.74 | 764   | 13.64 |
| 2007/10/22 | 87.56 | 87.6  | 73972.65 | 44778.38 | 6.89 | 71.8  | 112.66 | 755.8 | 13.56 |
| 2007/10/23 | 85.27 | 86.45 | 73972.65 | 44778.38 | 6.76 | 71.11 | 112.91 | 759   | 13.65 |
| 2007/10/24 | 87.1  | 88.3  | 73972.65 | 44778.38 | 6.97 | 71.15 | 112.41 | 761.6 | 13.59 |
| 2007/10/25 | 90.46 | 92.09 | 73972.65 | 44778.38 | 7.19 | 71.1  | 112.69 | 767.3 | 13.91 |
| 2007/10/26 | 91.86 | 91.73 | 73972.65 | 44778.38 | 7.22 | 71.05 | 112.53 | 783.9 | 14.28 |
| 2007/10/29 | 93.53 | 93.45 | 73972.65 | 44778.38 | 7.27 | 70.7  | 112.8  | 789.1 | 14.43 |
| 2007/10/30 | 90.38 | 90.33 | 73972.65 | 44778.38 | 8.02 | 70.53 | 112.62 | 787.8 | 14.33 |
| 2007/10/31 | 94.53 | 94.16 | 73972.65 | 44778.38 | 8.33 | 70.09 | 110.99 | 795.3 | 14.44 |
| 2007/11/1  | 93.49 | 93.53 | 73706.2  | 45671.43 | 8.64 | 69.94 | 110.52 | 793.7 | 14.33 |
| 2007/11/2  | 95.93 | 95.81 | 73706.2  | 45671.43 | 8.42 | 69.56 | 110.5  | 808.5 | 14.6  |
| 2007/11/5  | 93.98 | 94.06 | 73706.2  | 45671.43 | 8    | 69.87 | 110.5  | 810.8 | 14.79 |
| 2007/11/6  | 96.7  | 96.65 | 73706.2  | 45671.43 | 7.86 | 69.62 | 110.56 | 823.4 | 15.38 |
| 2007/11/7  | 96.37 | 96.46 | 73706.2  | 45671.43 | 7.62 | 69.15 | 110.54 | 833.5 | 15.33 |
| 2007/11/8  | 95.46 | 95.51 | 73706.2  | 45671.43 | 7.71 | 68.97 | 110.37 | 837.5 | 15.52 |
| 2007/11/9  | 96.32 | 96.36 | 73706.2  | 45671.43 | 7.9  | 69.51 | 109.91 | 834.7 | 15.55 |
| 2007/11/12 | 94.62 | 94.4  | 73706.2  | 45671.43 | 7.96 | 70.79 | 111.4  | 807.7 | 14.76 |
| 2007/11/13 | 91.17 | 91.18 | 73706.2  | 45671.43 | 7.95 | 70.18 | 111.9  | 799   | 14.61 |
| 2007/11/14 | 94.09 | 94.02 | 73706.2  | 45671.43 | 7.84 | 70.87 | 111.54 | 814.7 | 15.07 |
| 2007/11/15 | 93.43 | 93.37 | 73706.2  | 45671.43 | 7.7  | 71.08 | 112.67 | 787.3 | 14.44 |
| 2007/11/16 | 95.1  | 94.81 | 73706.2  | 45671.43 | 8    | 70.85 | 113.21 | 787   | 14.51 |
| 2007/11/19 | 94.64 | 95.75 | 73706.2  | 45671.43 | 7.79 | 70.91 | 112.97 | 778   | 14.16 |
| 2007/11/20 | 98.03 | 99.16 | 73706.2  | 45671.43 | 7.48 | 70.33 | 112.83 | 791.4 | 14.5  |
| 2007/11/21 | 97.29 | 98.57 | 73706.2  | 45671.43 | 7.55 | 70.33 | 112.76 | 798.6 | 14.42 |
| 2007/11/23 | 98.18 | 98.24 | 73706.2  | 45671.43 | 7.7  | 70.52 | 113    | 824.7 | 14.74 |
| 2007/11/26 | 97.7  | 97.66 | 73706.2  | 45671.43 | 7.72 | 70.16 | 113.1  | 826.5 | 14.83 |
| 2007/11/27 | 94.42 | 94.39 | 73706.2  | 45671.43 | 7.56 | 70.26 | 112.75 | 814   | 14.49 |
| 2007/11/28 | 90.62 | 90.71 | 73706.2  | 45671.43 | 7.2  | 69.8  | 112.68 | 800.3 | 14.34 |
| 2007/11/29 | 91.01 | 90.98 | 73706.2  | 45671.43 | 7.45 | 70.51 | 112.53 | 795.3 | 14.24 |
| 2007/11/30 | 88.71 | 88.6  | 73706.2  | 45671.43 | 7.3  | 70.66 | 112.03 | 782.2 | 13.96 |
| 2007/12/3  | 89.31 | 89.29 | 74316.72 | 45289.68 | 7.21 | 70.8  | 111.96 | 788.3 | 14.01 |
| 2007/12/4  | 88.32 | 88.31 | 74316.72 | 45289.68 | 7.16 | 71.07 | 111.74 | 801.3 | 14.27 |
| 2007/12/5  | 87.49 | 87.45 | 74316.72 | 45289.68 | 7.19 | 72.21 | 112.48 | 797.5 | 14.27 |
| 2007/12/6  | 90.23 | 90.25 | 74316.72 | 45289.68 | 7.33 | 72.16 | 113.46 | 801.2 | 14.44 |
| 2007/12/7  | 88.28 | 88.23 | 74316.72 | 45289.68 | 7.16 | 72.02 | 113.57 | 794.4 | 14.33 |
| 2007/12/10 | 87.86 | 87.72 | 74316.72 | 45289.68 | 7.03 | 71.49 | 113.37 | 807.7 | 14.67 |
| 2007/12/11 | 90.02 | 90.12 | 74316.72 | 45289.68 | 7.09 | 71.92 | 112.97 | 811.4 | 14.7  |
| 2007/12/12 | 94.39 | 94.41 | 74316.72 | 45289.68 | 7.41 | 71.49 | 113.01 | 813.5 | 14.66 |
| 2007/12/13 | 92.25 | 92.35 | 74316.72 | 45289.68 | 7.19 | 71.68 | 113.2  | 799   | 14.07 |
| 2007/12/14 | 91.27 | 91.31 | 74316.72 | 45289.68 | 7.03 | 72.6  | 112.93 | 793.3 | 13.83 |
| 2007/12/17 | 90.63 | 90.69 | 74316.72 | 45289.68 | 7.04 | 72.41 | 113.21 | 794.8 | 13.83 |
| 2007/12/18 | 90.49 | 89.93 | 74316.72 | 45289.68 | 7.14 | 72.63 | 113.13 | 803   | 14.01 |
| 2007/12/19 | 91.24 | 91.11 | 74316.72 | 45289.68 | 7.18 | 73.24 | 113.5  | 801.1 | 14.07 |
| 2007/12/20 | 91.06 | 90.88 | 74316.72 | 45289.68 | 7.14 | 73.76 | 114.43 | 799.2 | 14.2  |
| 2007/12/21 | 93.31 | 93.19 | 74316.72 | 45289.68 | 7.19 | 73.78 | 114.85 | 811.6 | 14.35 |
| 2007/12/24 | 94.13 | 94    | 74316.72 | 45289.68 | 7.03 | 74.01 | 115.12 | 812.8 | 14.52 |
| 2007/12/26 | 95.97 | 95.89 | 74316.72 | 45289.68 | 7.05 | 73.76 | 115.34 | 826   | 14.7  |
| 2007/12/27 | 96.62 | 96.63 | 74316.72 | 45289.68 | 7.17 | 73.32 | 115.37 | 828.6 | 14.68 |
| 2007/12/28 | 96    | 96.03 | 74316.72 | 45289.68 | 7.39 | 73.44 | 115.26 | 842.7 | 14.77 |
| 2007/12/31 | 95.98 | 95.95 | 74316.72 | 45289.68 | 7.48 | 73.71 | 115.26 | 838   | 14.8  |
| 2008/1/2   | 99.62 | 99.64 | 74505.06 | 45152.56 | 7.85 | 72.95 | 115.26 | 860   | 15.17 |
| 2008/1/3   | 99.18 | 99.17 | 74505.06 | 45152.56 | 7.67 | 73.35 | 115.26 | 869.1 | 15.38 |
| 2008/1/4   | 97.91 | 97.9  | 74505.06 | 45152.56 | 7.84 | 73.28 | 115.26 | 865.7 | 15.35 |
| 2008/1/7   | 95.09 | 95.08 | 74505.06 | 45152.56 | 7.88 | 73.38 | 115.26 | 862   | 15.18 |

|           |        |        |          |          |       |       |        |        |       |
|-----------|--------|--------|----------|----------|-------|-------|--------|--------|-------|
| 2008/1/8  | 96.33  | 96.43  | 74505.06 | 45152.56 | 7.97  | 73.27 | 115.26 | 880.3  | 15.71 |
| 2008/1/9  | 95.67  | 95.64  | 74505.06 | 45152.56 | 8.1   | 73.8  | 113.82 | 881.7  | 15.73 |
| 2008/1/10 | 93.71  | 93.92  | 74505.06 | 45152.56 | 8.26  | 73.69 | 114.38 | 893.6  | 16.17 |
| 2008/1/11 | 92.69  | 92.74  | 74505.06 | 45152.56 | 8.21  | 73.86 | 115.14 | 897.7  | 16.27 |
| 2008/1/14 | 94.2   | 94.23  | 74505.06 | 45152.56 | 8.35  | 73.89 | 114.95 | 903.4  | 16.33 |
| 2008/1/15 | 91.9   | 91.87  | 74505.06 | 45152.56 | 8.2   | 73.65 | 115.14 | 902.6  | 16.21 |
| 2008/1/16 | 90.84  | 90.8   | 74505.06 | 45152.56 | 8.13  | 73.62 | 114.95 | 882    | 15.81 |
| 2008/1/17 | 90.13  | 90.11  | 74505.06 | 45152.56 | 8.08  | 73.34 | 113.87 | 880.5  | 15.93 |
| 2008/1/18 | 90.57  | 90.55  | 74505.06 | 45152.56 | 7.99  | 73.93 | 113.43 | 881.7  | 16.14 |
| 2008/1/22 | 89.85  | 89.64  | 74505.06 | 45152.56 | 7.67  | 73.7  | 113.5  | 890.3  | 16.03 |
| 2008/1/23 | 86.99  | 87.65  | 74505.06 | 45152.56 | 7.62  | 73.91 | 113.6  | 883.1  | 15.9  |
| 2008/1/24 | 89.41  | 89.98  | 74505.06 | 45152.56 | 7.8   | 73.13 | 113.77 | 905.8  | 16.27 |
| 2008/1/25 | 90.71  | 90.37  | 74505.06 | 45152.56 | 7.98  | 72.95 | 113.34 | 910.7  | 16.43 |
| 2008/1/28 | 90.99  | 90.99  | 74505.06 | 45152.56 | 8.1   | 72.86 | 112.62 | 927.1  | 16.69 |
| 2008/1/29 | 91.64  | 91.66  | 74505.06 | 45152.56 | 8     | 72.66 | 112.71 | 925.1  | 16.75 |
| 2008/1/30 | 92.33  | 92.34  | 74505.06 | 45152.56 | 8.05  | 72.71 | 112.51 | 920.6  | 16.76 |
| 2008/1/31 | 91.75  | 91.67  | 74505.06 | 45152.56 | 8.07  | 72.75 | 112.32 | 922.7  | 17    |
| 2008/2/1  | 88.96  | 89.03  | 74594.11 | 46021.57 | 7.74  | 73.78 | 112.26 | 908.7  | 16.87 |
| 2008/2/4  | 90.02  | 90.07  | 74594.11 | 46021.57 | 7.87  | 73.56 | 113.35 | 904.9  | 16.78 |
| 2008/2/5  | 88.41  | 88.32  | 74594.11 | 46021.57 | 7.94  | 73.91 | 112.66 | 885.9  | 16.35 |
| 2008/2/6  | 87.14  | 87.16  | 74594.11 | 46021.57 | 7.99  | 74.02 | 112.61 | 900.7  | 16.55 |
| 2008/2/7  | 88.11  | 88.07  | 74594.11 | 46021.57 | 8.1   | 74.76 | 112.89 | 906.1  | 16.78 |
| 2008/2/8  | 91.77  | 91.77  | 74594.11 | 46021.57 | 8.3   | 74.62 | 113.33 | 918.4  | 17.11 |
| 2008/2/11 | 93.59  | 93.56  | 74594.11 | 46021.57 | 8.53  | 74.4  | 113.65 | 922.9  | 17.47 |
| 2008/2/12 | 92.78  | 92.82  | 74594.11 | 46021.57 | 8.44  | 74.09 | 113.27 | 907.4  | 17.25 |
| 2008/2/13 | 93.27  | 93.28  | 74594.11 | 46021.57 | 8.39  | 73.95 | 112.92 | 906.5  | 17.35 |
| 2008/2/14 | 95.46  | 95.42  | 74594.11 | 46021.57 | 8.77  | 73.74 | 112.47 | 907.4  | 17.26 |
| 2008/2/15 | 95.5   | 95.57  | 74594.11 | 46021.57 | 8.66  | 74.05 | 112.55 | 902.8  | 17.12 |
| 2008/2/19 | 100.01 | 99.99  | 74594.11 | 46021.57 | 8.98  | 74.53 | 113.91 | 926.6  | 17.51 |
| 2008/2/20 | 100.74 | 100.86 | 74594.11 | 46021.57 | 8.97  | 74.76 | 113.95 | 934.6  | 17.76 |
| 2008/2/21 | 98.23  | 98.57  | 74594.11 | 46021.57 | 8.89  | 73.96 | 114.26 | 946.1  | 17.95 |
| 2008/2/22 | 98.81  | 99.03  | 74594.11 | 46021.57 | 9.15  | 73.75 | 113.5  | 944.7  | 18.04 |
| 2008/2/25 | 99.23  | 99.4   | 74594.11 | 46021.57 | 9.19  | 73.8  | 113.5  | 937.6  | 18.09 |
| 2008/2/26 | 100.88 | 100.83 | 74594.11 | 46021.57 | 9.21  | 73.07 | 113.43 | 946.1  | 18.72 |
| 2008/2/27 | 99.64  | 99.59  | 74594.11 | 46021.57 | 8.93  | 73.25 | 113.3  | 958.2  | 19.21 |
| 2008/2/28 | 102.59 | 102.6  | 74594.11 | 46021.57 | 9.44  | 72.99 | 114.06 | 967.5  | 19.63 |
| 2008/2/29 | 101.84 | 101.78 | 74594.11 | 46021.57 | 9.37  | 73.03 | 113.5  | 975    | 19.81 |
| 2008/3/3  | 102.45 | 102.42 | 74820.15 | 44707.93 | 9.35  | 72.92 | 113.58 | 984.2  | 20.07 |
| 2008/3/4  | 99.52  | 99.72  | 74820.15 | 44707.93 | 9.35  | 72.81 | 113.32 | 966.3  | 19.74 |
| 2008/3/5  | 104.52 | 104.45 | 74820.15 | 44707.93 | 9.74  | 72.59 | 113.73 | 988.5  | 20.69 |
| 2008/3/6  | 105.47 | 105.51 | 74820.15 | 44707.93 | 9.74  | 71.94 | 113.59 | 977.1  | 20.13 |
| 2008/3/7  | 105.15 | 105.12 | 74820.15 | 44707.93 | 9.77  | 71.79 | 112.73 | 974.2  | 20.16 |
| 2008/3/10 | 107.9  | 107.9  | 74820.15 | 44707.93 | 10.02 | 72.06 | 112.73 | 971.8  | 19.7  |
| 2008/3/11 | 108.75 | 108.73 | 74820.15 | 44707.93 | 10    | 72.05 | 113.08 | 976    | 19.68 |
| 2008/3/12 | 109.92 | 109.86 | 74820.15 | 44707.93 | 10.01 | 71.33 | 112.78 | 980.5  | 19.91 |
| 2008/3/13 | 110.33 | 110.21 | 74820.15 | 44707.93 | 10.23 | 71.15 | 112.41 | 993.8  | 20.34 |
| 2008/3/14 | 110.21 | 110.03 | 74820.15 | 44707.93 | 9.87  | 71.54 | 112.63 | 999.5  | 20.57 |
| 2008/3/17 | 105.68 | 105.74 | 74820.15 | 44707.93 | 9.1   | 72.34 | 114.38 | 1002.6 | 20.22 |
| 2008/3/18 | 109.42 | 109.57 | 74820.15 | 44707.93 | 9.41  | 72.03 | 114.74 | 1004.3 | 19.89 |
| 2008/3/19 | 104.48 | 103.25 | 74820.15 | 44707.93 | 9.02  | 72.93 | 114.38 | 945.3  | 18.4  |
| 2008/3/20 | 101.84 | 102.57 | 74820.15 | 44707.93 | 9.07  | 72.81 | 115.34 | 920    | 16.81 |
| 2008/3/24 | 100.86 | 101.7  | 74820.15 | 44707.93 | 9.33  | 72.78 | 114.69 | 918.7  | 17.07 |
| 2008/3/25 | 101.22 | 101.78 | 74820.15 | 44707.93 | 9.42  | 72.16 | 114.64 | 935    | 17.76 |
| 2008/3/26 | 105.9  | 105.83 | 74820.15 | 44707.93 | 9.57  | 72.06 | 114.25 | 949.2  | 18.35 |

|           |        |        |          |          |       |       |        |       |       |
|-----------|--------|--------|----------|----------|-------|-------|--------|-------|-------|
| 2008/3/27 | 107.58 | 107.56 | 74820.15 | 44707.93 | 9.58  | 72.09 | 114.76 | 948.8 | 18.51 |
| 2008/3/28 | 105.62 | 105.59 | 74820.15 | 44707.93 | 9.8   | 72.48 | 115.23 | 930.6 | 17.94 |
| 2008/3/31 | 101.58 | 101.54 | 74820.15 | 44707.93 | 10.1  | 72.92 | 115.02 | 916.2 | 17.31 |
| 2008/4/1  | 100.98 | 100.92 | 74249.11 | 44190.28 | 9.72  | 73.23 | 115.24 | 882.9 | 16.89 |
| 2008/4/2  | 104.83 | 104.83 | 74249.11 | 44190.28 | 9.83  | 72.8  | 114.8  | 895.2 | 17.18 |
| 2008/4/3  | 103.83 | 103.92 | 74249.11 | 44190.28 | 9.42  | 72.54 | 114.6  | 905   | 17.48 |
| 2008/4/4  | 106.23 | 106.09 | 74249.11 | 44190.28 | 9.32  | 72.65 | 114.22 | 909   | 17.76 |
| 2008/4/7  | 109.09 | 108.91 | 74249.11 | 44190.28 | 9.79  | 72.82 | 114.63 | 922.7 | 18.12 |
| 2008/4/8  | 108.5  | 108.54 | 74249.11 | 44190.28 | 9.7   | 73.56 | 115.08 | 914   | 17.71 |
| 2008/4/9  | 110.87 | 110.89 | 74249.11 | 44190.28 | 10.06 | 73.3  | 116.15 | 933.6 | 18.2  |
| 2008/4/10 | 110.11 | 110.07 | 74249.11 | 44190.28 | 10.1  | 73.44 | 116.07 | 928.3 | 18.04 |
| 2008/4/11 | 110.14 | 110.14 | 74249.11 | 44190.28 | 9.9   | 73.48 | 115.97 | 923.6 | 17.69 |
| 2008/4/14 | 111.76 | 111.71 | 74249.11 | 44190.28 | 10.05 | 73.23 | 115.88 | 925.4 | 17.79 |
| 2008/4/15 | 113.79 | 113.77 | 74249.11 | 44190.28 | 10.21 | 73.77 | 116.36 | 928.7 | 17.85 |
| 2008/4/16 | 114.93 | 114.8  | 74249.11 | 44190.28 | 10.43 | 73.39 | 116.52 | 945.1 | 18.33 |
| 2008/4/17 | 114.86 | 114.8  | 74249.11 | 44190.28 | 10.38 | 72.77 | 116.73 | 939.8 | 18.31 |
| 2008/4/18 | 116.69 | 116.56 | 74249.11 | 44190.28 | 10.59 | 72.58 | 115.34 | 912.2 | 17.82 |
| 2008/4/21 | 117.48 | 117.48 | 74249.11 | 44190.28 | 10.73 | 73.15 | 114.74 | 914.7 | 17.36 |
| 2008/4/22 | 119.37 | 119.17 | 74249.11 | 44190.28 | 10.61 | 72.55 | 115.96 | 922.3 | 17.71 |
| 2008/4/23 | 118.3  | 119.28 | 74249.11 | 44190.28 | 10.78 | 73.17 | 115.74 | 906.2 | 17.17 |
| 2008/4/24 | 116.06 | 117.1  | 74249.11 | 44190.28 | 10.79 | 73.42 | 115.94 | 886.8 | 16.66 |
| 2008/4/25 | 118.52 | 119.64 | 74249.11 | 44190.28 | 10.96 | 72.98 | 115.43 | 887.2 | 16.85 |
| 2008/4/28 | 118.75 | 118.78 | 74249.11 | 44190.28 | 11.28 | 72.72 | 114.83 | 892.9 | 17.01 |
| 2008/4/29 | 115.63 | 115.67 | 74249.11 | 44190.28 | 10.84 | 73.51 | 114.27 | 876.8 | 16.54 |
| 2008/4/30 | 113.46 | 113.7  | 74249.11 | 44190.28 | 10.84 | 72.85 | 114.86 | 865.1 | 16.5  |
| 2008/5/1  | 112.52 | 112.6  | 74567.64 | 43624.49 | 10.56 | 73.17 | 114.86 | 850.9 | 16.12 |
| 2008/5/2  | 116.32 | 116.36 | 74567.64 | 43624.49 | 10.78 | 73.37 | 114.86 | 858   | 16.38 |
| 2008/5/5  | 119.97 | 119.94 | 74567.64 | 43624.49 | 11.18 | 73.3  | 113.75 | 874.1 | 16.75 |
| 2008/5/6  | 121.84 | 121.82 | 74567.64 | 43624.49 | 11.15 | 73.27 | 114.04 | 877.7 | 16.78 |
| 2008/5/7  | 123.53 | 123.56 | 74567.64 | 43624.49 | 11.33 | 74.01 | 114.37 | 871.2 | 16.62 |
| 2008/5/8  | 123.69 | 123.77 | 74567.64 | 43624.49 | 11.26 | 73.97 | 114.6  | 882.1 | 16.79 |
| 2008/5/9  | 125.96 | 125.94 | 74567.64 | 43624.49 | 11.54 | 74.07 | 114.6  | 885.8 | 16.84 |
| 2008/5/12 | 124.23 | 124.02 | 74567.64 | 43624.49 | 11.3  | 73.9  | 115.05 | 884.9 | 17.16 |
| 2008/5/13 | 125.8  | 125.83 | 74567.64 | 43624.49 | 11.42 | 74.33 | 115.28 | 869.6 | 16.76 |
| 2008/5/14 | 124.22 | 124.21 | 74567.64 | 43624.49 | 11.6  | 74.28 | 115.22 | 866.5 | 16.55 |
| 2008/5/15 | 124.12 | 124.25 | 74567.64 | 43624.49 | 11.4  | 74.23 | 115.02 | 880   | 16.63 |
| 2008/5/16 | 126.29 | 126.5  | 74567.64 | 43624.49 | 11.09 | 73.95 | 115.09 | 899.9 | 16.9  |
| 2008/5/19 | 127.05 | 127.15 | 74567.64 | 43624.49 | 10.95 | 74.2  | 115.01 | 905.8 | 16.97 |
| 2008/5/20 | 129.07 | 128.93 | 74567.64 | 43624.49 | 11.37 | 73.5  | 115.1  | 920.2 | 17.67 |
| 2008/5/21 | 133.17 | 132.99 | 74567.64 | 43624.49 | 11.64 | 73.33 | 114.75 | 928.6 | 18    |
| 2008/5/22 | 130.81 | 130.04 | 74567.64 | 43624.49 | 11.7  | 73.04 | 114.97 | 918.3 | 17.98 |
| 2008/5/23 | 132.19 | 131.58 | 74567.64 | 43624.49 | 11.86 | 73.04 | 114.34 | 925.8 | 18.24 |
| 2008/5/27 | 128.85 | 128.81 | 74567.64 | 43624.49 | 11.8  | 73.24 | 114.7  | 907.9 | 17.43 |
| 2008/5/28 | 131.03 | 131    | 74567.64 | 43624.49 | 11.92 | 73.03 | 114.64 | 900.5 | 17.38 |
| 2008/5/29 | 126.62 | 126.7  | 74567.64 | 43624.49 | 11.47 | 73.19 | 114.49 | 877.2 | 16.52 |
| 2008/5/30 | 127.35 | 127.35 | 74567.64 | 43624.49 | 11.7  | 72.94 | 113.79 | 887.3 | 16.87 |
| 2008/6/2  | 127.76 | 127.75 | 74575.04 | 43177.45 | 11.97 | 73.34 | 113.83 | 892.9 | 16.91 |
| 2008/6/3  | 124.31 | 124.33 | 74575.04 | 43177.45 | 12.22 | 73.49 | 114.52 | 881.6 | 16.84 |
| 2008/6/4  | 122.3  | 122.3  | 74575.04 | 43177.45 | 12.38 | 73.79 | 114.42 | 879.9 | 16.94 |
| 2008/6/5  | 127.79 | 127.93 | 74575.04 | 43177.45 | 12.52 | 73.65 | 114.66 | 871.8 | 17.17 |
| 2008/6/6  | 138.54 | 138.51 | 74575.04 | 43177.45 | 12.69 | 73.19 | 114.96 | 895.4 | 17.43 |
| 2008/6/9  | 134.35 | 134.44 | 74575.04 | 43177.45 | 12.6  | 73.04 | 115.12 | 894.7 | 17.21 |
| 2008/6/10 | 131.31 | 131.38 | 74575.04 | 43177.45 | 12.44 | 73.8  | 114.95 | 867.9 | 16.64 |
| 2008/6/11 | 136.38 | 136.43 | 74575.04 | 43177.45 | 12.66 | 73.43 | 115.19 | 879.7 | 16.86 |

|           |        |        |          |          |       |       |        |       |       |
|-----------|--------|--------|----------|----------|-------|-------|--------|-------|-------|
| 2008/6/12 | 136.74 | 136.91 | 74575.04 | 43177.45 | 12.8  | 74.1  | 115.19 | 869.2 | 16.49 |
| 2008/6/13 | 134.86 | 134.84 | 74575.04 | 43177.45 | 12.63 | 74.05 | 115.19 | 870.3 | 16.56 |
| 2008/6/16 | 134.61 | 134.52 | 74575.04 | 43177.45 | 12.93 | 73.44 | 114.78 | 883.6 | 17.23 |
| 2008/6/17 | 134.01 | 133.99 | 74575.04 | 43177.45 | 12.95 | 73.7  | 114.57 | 884.3 | 17.08 |
| 2008/6/18 | 136.68 | 136.54 | 74575.04 | 43177.45 | 13.21 | 73.61 | 115.45 | 890.9 | 17.34 |
| 2008/6/19 | 131.93 | 131.88 | 74575.04 | 43177.45 | 12.86 | 73.1  | 115.23 | 901.7 | 17.47 |
| 2008/6/20 | 134.62 | 134.78 | 74575.04 | 43177.45 | 12.99 | 72.99 | 114.37 | 901.3 | 17.4  |
| 2008/6/23 | 136.74 | 135.98 | 74575.04 | 43177.45 | 13.2  | 73.37 | 114.58 | 884.8 | 16.79 |
| 2008/6/24 | 137    | 136.49 | 74575.04 | 43177.45 | 13.01 | 73.15 | 114.78 | 889.2 | 16.63 |
| 2008/6/25 | 134.55 | 133.92 | 74575.04 | 43177.45 | 12.75 | 73.03 | 114.58 | 880   | 16.5  |
| 2008/6/26 | 139.64 | 138.91 | 74575.04 | 43177.45 | 13.11 | 72.5  | 114.77 | 913.1 | 17.13 |
| 2008/6/27 | 140.21 | 139.69 | 74575.04 | 43177.45 | 13.2  | 72.27 | 114.34 | 931.3 | 17.62 |
| 2008/6/30 | 140    | 139.96 | 74575.04 | 43177.45 | 13.35 | 72.32 | 113.51 | 928.3 | 17.42 |
| 2008/7/1  | 140.97 | 141.06 | 75308.8  | 43228.11 | 13.51 | 71.79 | 113.17 | 944.5 | 18.2  |
| 2008/7/2  | 143.57 | 143.74 | 75308.8  | 43228.11 | 13.39 | 71.85 | 113.37 | 946.5 | 18.34 |
| 2008/7/3  | 145.29 | 145.31 | 75308.8  | 43228.11 | 13.58 | 72.25 | 113.78 | 933.6 | 18.29 |
| 2008/7/7  | 141.37 | 141.38 | 75308.8  | 43228.11 | 12.98 | 72.51 | 113.88 | 928.8 | 17.84 |
| 2008/7/8  | 136.04 | 136.06 | 75308.8  | 43228.11 | 12.37 | 72.74 | 114.19 | 923.3 | 17.88 |
| 2008/7/9  | 136.05 | 135.88 | 75308.8  | 43228.11 | 12.01 | 72.23 | 114.86 | 928.6 | 18.1  |
| 2008/7/10 | 141.65 | 141.47 | 75308.8  | 43228.11 | 12.3  | 72.45 | 114.34 | 942   | 18.25 |
| 2008/7/11 | 145.08 | 144.96 | 75308.8  | 43228.11 | 11.9  | 72.04 | 114.54 | 960.6 | 18.75 |
| 2008/7/14 | 145.18 | 145.16 | 75308.8  | 43228.11 | 11.96 | 71.82 | 114.83 | 973.7 | 19.18 |
| 2008/7/15 | 138.74 | 138.68 | 75308.8  | 43228.11 | 11.48 | 71.45 | 114.47 | 978.7 | 18.94 |
| 2008/7/16 | 134.6  | 134.63 | 75308.8  | 43228.11 | 11.4  | 71.69 | 113.8  | 962.7 | 18.74 |
| 2008/7/17 | 129.29 | 129.43 | 75308.8  | 43228.11 | 10.54 | 71.65 | 113.96 | 970.7 | 18.67 |
| 2008/7/18 | 128.88 | 128.94 | 75308.8  | 43228.11 | 10.57 | 71.67 | 114.6  | 958   | 18.14 |
| 2008/7/21 | 131.04 | 131.43 | 75308.8  | 43228.11 | 10.51 | 71.53 | 114.52 | 963.7 | 18.36 |
| 2008/7/22 | 127.95 | 127.25 | 75308.8  | 43228.11 | 10.07 | 71.94 | 113.98 | 948.5 | 17.95 |
| 2008/7/23 | 124.44 | 123.73 | 75308.8  | 43228.11 | 9.79  | 71.72 | 114.03 | 922.8 | 17.4  |
| 2008/7/24 | 125.49 | 124.62 | 75308.8  | 43228.11 | 9.32  | 72.12 | 113.68 | 922.3 | 17.25 |
| 2008/7/25 | 123.26 | 122.59 | 75308.8  | 43228.11 | 9.08  | 71.93 | 114.11 | 926.8 | 17.33 |
| 2008/7/28 | 124.73 | 124.72 | 75308.8  | 43228.11 | 9.16  | 71.83 | 114.2  | 927.7 | 17.42 |
| 2008/7/29 | 122.19 | 122.21 | 75308.8  | 43228.11 | 9.22  | 72.35 | 113.75 | 916.5 | 17.33 |
| 2008/7/30 | 126.77 | 126.74 | 75308.8  | 43228.11 | 9.25  | 72.3  | 114.03 | 902.9 | 17.47 |
| 2008/7/31 | 124.08 | 124.17 | 75308.8  | 43228.11 | 9.12  | 72.23 | 114.53 | 913.9 | 17.79 |
| 2008/8/1  | 125.1  | 125.03 | 74215.15 | 42593.3  | 9.39  | 73.33 | 114.61 | 909   | 17.52 |
| 2008/8/4  | 121.41 | 121.45 | 74215.15 | 42593.3  | 8.73  | 73.86 | 115.21 | 900.1 | 17.14 |
| 2008/8/5  | 119.17 | 118.71 | 74215.15 | 42593.3  | 8.73  | 74.17 | 115.83 | 878.6 | 16.57 |
| 2008/8/6  | 118.58 | 118.57 | 74215.15 | 42593.3  | 8.77  | 74.38 | 115.51 | 875.6 | 16.51 |
| 2008/8/7  | 120.02 | 119.84 | 74215.15 | 42593.3  | 8.57  | 74.53 | 115.64 | 870.7 | 16.26 |
| 2008/8/8  | 115.2  | 115.42 | 74215.15 | 42593.3  | 8.25  | 75.4  | 115.49 | 857.8 | 15.33 |
| 2008/8/11 | 114.45 | 114.44 | 74215.15 | 42593.3  | 8.35  | 75.82 | 112.9  | 821.5 | 14.62 |
| 2008/8/12 | 113.01 | 113.1  | 74215.15 | 42593.3  | 8.33  | 76.4  | 114.73 | 808.2 | 14.49 |
| 2008/8/13 | 116    | 115.96 | 74215.15 | 42593.3  | 8.46  | 77.49 | 115.67 | 825   | 14.85 |
| 2008/8/14 | 115.01 | 115.05 | 74215.15 | 42593.3  | 8.14  | 77.52 | 117.15 | 808.2 | 14.23 |
| 2008/8/15 | 113.77 | 113.46 | 74215.15 | 42593.3  | 8.09  | 77.62 | 116.86 | 786   | 12.82 |
| 2008/8/18 | 112.87 | 112.92 | 74215.15 | 42593.3  | 7.89  | 77.77 | 116.32 | 799.7 | 13.1  |
| 2008/8/19 | 114.53 | 114.39 | 74215.15 | 42593.3  | 7.98  | 77.6  | 116.53 | 811.1 | 13.11 |
| 2008/8/20 | 114.98 | 115.48 | 74215.15 | 42593.3  | 8.08  | 77.82 | 116.87 | 810.3 | 13.04 |
| 2008/8/21 | 121.18 | 121.23 | 74215.15 | 42593.3  | 8.25  | 77.14 | 117.07 | 833   | 13.73 |
| 2008/8/22 | 114.59 | 114.48 | 74215.15 | 42593.3  | 7.84  | 78.17 | 117    | 827.4 | 13.48 |
| 2008/8/25 | 115.11 | 114.85 | 74215.15 | 42593.3  | 7.83  | 78.19 | 117.82 | 819.8 | 13.37 |
| 2008/8/26 | 116.27 | 116.31 | 74215.15 | 42593.3  | 8.28  | 78.8  | 117.4  | 822.2 | 13.58 |
| 2008/8/27 | 118.15 | 118.17 | 74215.15 | 42593.3  | 8.39  | 78.97 | 117.17 | 828.1 | 13.47 |

|            |        |        |          |          |      |       |        |       |       |
|------------|--------|--------|----------|----------|------|-------|--------|-------|-------|
| 2008/8/28  | 115.59 | 115.58 | 74215.15 | 42593.3  | 8.05 | 79.21 | 117.86 | 833.3 | 13.6  |
| 2008/8/29  | 115.46 | 115.55 | 74215.15 | 42593.3  | 7.94 | 79.53 | 118.27 | 831.2 | 13.61 |
| 2008/9/2   | 109.71 | 109.63 | 73215.89 | 42039.74 | 7.26 | 81.72 | 119.98 | 806.6 | 13.05 |
| 2008/9/3   | 109.35 | 109.38 | 73215.89 | 42039.74 | 7.26 | 82.11 | 120.25 | 804.3 | 12.86 |
| 2008/9/4   | 107.89 | 107.99 | 73215.89 | 42039.74 | 7.32 | 82.82 | 117.83 | 799.3 | 12.86 |
| 2008/9/5   | 106.23 | 106.47 | 73215.89 | 42039.74 | 7.45 | 82.51 | 118.27 | 798.8 | 12.25 |
| 2008/9/8   | 106.34 | 106.35 | 73215.89 | 42039.74 | 7.53 | 82.89 | 117.76 | 798.5 | 11.99 |
| 2008/9/9   | 103.26 | 103.23 | 73215.89 | 42039.74 | 7.54 | 82.87 | 117.76 | 788.1 | 11.64 |
| 2008/9/10  | 102.58 | 102.66 | 73215.89 | 42039.74 | 7.39 | 83.35 | 117.33 | 758.9 | 10.82 |
| 2008/9/11  | 100.87 | 100.95 | 73215.89 | 42039.74 | 7.25 | 82.87 | 117.29 | 742.1 | 10.49 |
| 2008/9/12  | 101.18 | 101.19 | 73215.89 | 42039.74 | 7.37 | 81.23 | 116.57 | 761   | 10.74 |
| 2008/9/15  | 95.71  | 95.52  | 73215.89 | 42039.74 | 7.37 | 81    | 115.62 | 783.8 | 11.08 |
| 2008/9/16  | 91.15  | 91.49  | 73215.89 | 42039.74 | 7.28 | 81.82 | 115.83 | 777.1 | 10.46 |
| 2008/9/17  | 97.16  | 97.39  | 73215.89 | 42039.74 | 7.91 | 80.32 | 115.48 | 847.1 | 11.62 |
| 2008/9/18  | 97.88  | 97.5   | 73215.89 | 42039.74 | 7.62 | 80.26 | 114.63 | 893.2 | 12.65 |
| 2008/9/19  | 104.55 | 104.05 | 73215.89 | 42039.74 | 7.53 | 79.57 | 115.6  | 861   | 12.43 |
| 2008/9/22  | 120.92 | 122.61 | 73215.89 | 42039.74 | 7.66 | 78.43 | 114.12 | 904.3 | 13.4  |
| 2008/9/23  | 106.61 | 107.85 | 73215.89 | 42039.74 | 7.93 | 78.63 | 114.4  | 885.9 | 13.12 |
| 2008/9/24  | 105.73 | 106.84 | 73215.89 | 42039.74 | 7.68 | 78.9  | 113.92 | 889.4 | 13.38 |
| 2008/9/25  | 108.02 | 111.54 | 73215.89 | 42039.74 | 7.72 | 79.26 | 114.22 | 878   | 13.22 |
| 2008/9/26  | 106.89 | 106.77 | 73215.89 | 42039.74 | 7.47 | 78.98 | 115.39 | 882.9 | 13.46 |
| 2008/9/29  | 96.37  | 96.29  | 73215.89 | 42039.74 | 7.22 | 80.78 | 116.05 | 888.2 | 13.03 |
| 2008/9/30  | 100.64 | 100.7  | 73215.89 | 42039.74 | 7.44 | 81.7  | 113.83 | 874.2 | 12.28 |
| 2008/10/1  | 98.53  | 98.23  | 74215.55 | 44214.4  | 7.73 | 82.95 | 114.7  | 880.7 | 12.77 |
| 2008/10/2  | 93.97  | 93.84  | 74215.55 | 44214.4  | 7.48 | 83.3  | 114.99 | 839   | 11.12 |
| 2008/10/3  | 93.88  | 93.91  | 74215.55 | 44214.4  | 7.36 | 82.9  | 114.56 | 828.9 | 11.33 |
| 2008/10/6  | 87.81  | 88.15  | 74215.55 | 44214.4  | 6.84 | 84.27 | 113.81 | 862.7 | 11.29 |
| 2008/10/7  | 90.06  | 90.18  | 74215.55 | 44214.4  | 6.77 | 83.81 | 114.09 | 878.4 | 11.38 |
| 2008/10/8  | 88.95  | 88.94  | 74215.55 | 44214.4  | 6.74 | 85    | 113.96 | 903.1 | 11.77 |
| 2008/10/9  | 86.59  | 86.5   | 74215.55 | 44214.4  | 6.83 | 85.91 | 116.3  | 883.1 | 11.88 |
| 2008/10/10 | 77.7   | 77.44  | 74215.55 | 44214.4  | 6.54 | 86.16 | 118.31 | 855.4 | 10.6  |
| 2008/10/13 | 81.19  | 81.17  | 74215.55 | 44214.4  | 6.69 | 84.36 | 116.96 | 838.9 | 10.79 |
| 2008/10/14 | 78.63  | 78.69  | 74215.55 | 44214.4  | 6.73 | 84.34 | 114.92 | 836.3 | 11.06 |
| 2008/10/15 | 74.54  | 74.38  | 74215.55 | 44214.4  | 6.59 | 85.68 | 114.67 | 835.5 | 10.18 |
| 2008/10/16 | 69.85  | 69.81  | 74215.55 | 44214.4  | 6.7  | 84.81 | 115.15 | 801.5 | 9.64  |
| 2008/10/17 | 71.85  | 71.9   | 74215.55 | 44214.4  | 6.79 | 84.95 | 114.86 | 785.1 | 9.34  |
| 2008/10/20 | 74.25  | 74.08  | 74215.55 | 44214.4  | 6.74 | 85.62 | 115.03 | 787.6 | 9.69  |
| 2008/10/21 | 70.89  | 71.29  | 74215.55 | 44214.4  | 6.84 | 87.97 | 115.79 | 766.1 | 10.08 |
| 2008/10/22 | 66.75  | 66.92  | 74215.55 | 44214.4  | 6.78 | 90.42 | 119.3  | 733.3 | 9.46  |
| 2008/10/23 | 67.84  | 67.17  | 74215.55 | 44214.4  | 6.42 | 90.04 | 119.13 | 713.3 | 9.5   |
| 2008/10/24 | 64.15  | 63.34  | 74215.55 | 44214.4  | 6.24 | 92.29 | 121.96 | 729.1 | 9.3   |
| 2008/10/27 | 63.22  | 61.92  | 74215.55 | 44214.4  | 6.12 | 94.42 | 124.17 | 741.7 | 9.2   |
| 2008/10/28 | 62.73  | 62.8   | 74215.55 | 44214.4  | 6.19 | 91.83 | 122.94 | 739.3 | 8.79  |
| 2008/10/29 | 67.5   | 67.45  | 74215.55 | 44214.4  | 6.47 | 89.57 | 120.89 | 752.8 | 9.81  |
| 2008/10/30 | 65.96  | 65.79  | 74215.55 | 44214.4  | 6.43 | 89.78 | 119.08 | 738.5 | 9.79  |
| 2008/10/31 | 67.81  | 68.1   | 74215.55 | 44214.4  | 6.78 | 91.37 | 118.49 | 725.8 | 9.8   |
| 2008/11/3  | 63.91  | 63.93  | 74048.37 | 42777.31 | 6.84 | 94.52 | 118.49 | 734.7 | 9.83  |
| 2008/11/4  | 70.53  | 70.41  | 74048.37 | 42777.31 | 7.22 | 93.77 | 118.49 | 765.3 | 10.22 |
| 2008/11/5  | 65.3   | 65.41  | 74048.37 | 42777.31 | 7.25 | 93.99 | 121.67 | 755.4 | 10.55 |
| 2008/11/6  | 60.77  | 60.72  | 74048.37 | 42777.31 | 6.98 | 95.72 | 120.77 | 740.1 | 10.17 |
| 2008/11/7  | 61.04  | 61.06  | 74048.37 | 42777.31 | 6.76 | 95.59 | 122.6  | 743   | 10.1  |
| 2008/11/10 | 62.41  | 62.19  | 74048.37 | 42777.31 | 7.25 | 95.83 | 122.29 | 759.8 | 10.36 |
| 2008/11/11 | 59.33  | 59.38  | 74048.37 | 42777.31 | 6.71 | 97.22 | 121.52 | 740.4 | 9.93  |
| 2008/11/12 | 56.16  | 55.95  | 74048.37 | 42777.31 | 6.41 | 99.92 | 122.34 | 729.3 | 9.6   |

|            |       |       |          |          |      |        |        |       |       |
|------------|-------|-------|----------|----------|------|--------|--------|-------|-------|
| 2008/11/13 | 58.24 | 58.31 | 74048.37 | 42777.31 | 6.32 | 100.81 | 125.99 | 711.3 | 8.9   |
| 2008/11/14 | 57.04 | 57.18 | 74048.37 | 42777.31 | 6.31 | 101.48 | 127.8  | 754   | 9.59  |
| 2008/11/17 | 54.95 | 55.14 | 74048.37 | 42777.31 | 6.53 | 100.03 | 128.18 | 749   | 9.42  |
| 2008/11/18 | 54.39 | 54.42 | 74048.37 | 42777.31 | 6.52 | 99.86  | 125.76 | 738.3 | 9.63  |
| 2008/11/19 | 53.62 | 53.64 | 74048.37 | 42777.31 | 6.74 | 100.03 | 126.2  | 740.9 | 9.39  |
| 2008/11/20 | 49.62 | 48.86 | 74048.37 | 42777.31 | 6.32 | 101.55 | 126.51 | 753.4 | 9.09  |
| 2008/11/21 | 49.93 | 49.22 | 74048.37 | 42777.31 | 6.48 | 100.25 | 126.91 | 796.5 | 9.55  |
| 2008/11/24 | 54.5  | 53.63 | 74048.37 | 42777.31 | 6.89 | 98.52  | 125.85 | 825.2 | 10.42 |
| 2008/11/25 | 50.77 | 50.02 | 74048.37 | 42777.31 | 6.39 | 96.65  | 125.16 | 825.1 | 10.35 |
| 2008/11/26 | 54.44 | 54.2  | 74048.37 | 42777.31 | 6.88 | 97.6   | 123.48 | 815.9 | 10.31 |
| 2008/11/28 | 54.43 | 55.21 | 74048.37 | 42777.31 | 6.51 | 97.27  | 121.7  | 823.9 | 10.28 |
| 2008/12/1  | 49.28 | 49.34 | 73280.12 | 43604.02 | 6.6  | 101.17 | 121.02 | 781.4 | 9.42  |
| 2008/12/2  | 46.96 | 47.05 | 73280.12 | 43604.02 | 6.42 | 101.03 | 123.85 | 787.9 | 9.66  |
| 2008/12/3  | 46.79 | 46.79 | 73280.12 | 43604.02 | 6.35 | 101.85 | 123.89 | 775   | 9.64  |
| 2008/12/4  | 43.67 | 43.8  | 73280.12 | 43604.02 | 6.02 | 102.58 | 125.41 | 770   | 9.58  |
| 2008/12/5  | 40.81 | 41.01 | 73280.12 | 43604.02 | 5.74 | 102.46 | 124.16 | 756.8 | 9.49  |
| 2008/12/8  | 43.71 | 43.69 | 73280.12 | 43604.02 | 5.57 | 100.95 | 122.36 | 774.7 | 10.05 |
| 2008/12/9  | 42.07 | 42    | 73280.12 | 43604.02 | 5.58 | 102.06 | 124.05 | 779.3 | 9.92  |
| 2008/12/10 | 43.52 | 43.1  | 73280.12 | 43604.02 | 5.69 | 101.9  | 124.11 | 813.8 | 10.27 |
| 2008/12/11 | 47.98 | 47.77 | 73280.12 | 43604.02 | 5.6  | 100.23 | 122.9  | 831.4 | 10.49 |
| 2008/12/12 | 46.28 | 46.27 | 73280.12 | 43604.02 | 5.49 | 100.71 | 123.95 | 825.2 | 10.29 |
| 2008/12/15 | 44.51 | 44.61 | 73280.12 | 43604.02 | 5.65 | 98.39  | 122.78 | 840.8 | 10.67 |
| 2008/12/16 | 43.6  | 43.84 | 73280.12 | 43604.02 | 5.75 | 96.66  | 121.85 | 846.9 | 10.76 |
| 2008/12/17 | 40.06 | 40.17 | 73280.12 | 43604.02 | 5.62 | 96.93  | 119.6  | 871.8 | 11.46 |
| 2008/12/18 | 36.22 | 36.73 | 73280.12 | 43604.02 | 5.56 | 100.28 | 120.73 | 863.7 | 11.16 |
| 2008/12/19 | 33.87 | 33.17 | 73280.12 | 43604.02 | 5.33 | 100.87 | 122.66 | 840.5 | 10.89 |
| 2008/12/22 | 39.91 | 31.1  | 73280.12 | 43604.02 | 5.29 | 101.59 | 121.49 | 850.6 | 10.9  |
| 2008/12/23 | 38.98 | 30.28 | 73280.12 | 43604.02 | 5.74 | 102.27 | 122    | 841.2 | 10.3  |
| 2008/12/24 | 35.35 | 32.94 | 73280.12 | 43604.02 | 5.91 | 102.55 | 121.69 | 854.1 | 10.39 |
| 2008/12/26 | 37.71 | 37.58 | 73280.12 | 43604.02 | 5.83 | 103.23 | 119.88 | 874.5 | 10.57 |
| 2008/12/29 | 40.02 | 39.89 | 73280.12 | 43604.02 | 6.08 | 104.64 | 119.28 | 878.6 | 10.85 |
| 2008/12/30 | 39.03 | 38.95 | 73280.12 | 43604.02 | 5.86 | 104.51 | 120.48 | 873   | 11.01 |
| 2008/12/31 | 44.6  | 44.6  | 73280.12 | 43604.02 | 5.62 | 103.42 | 117.21 | 890.2 | 11.33 |
| 2009/1/2   | 46.34 | 46.17 | 72321.84 | 42706.34 | 5.97 | 102.38 | 117.21 | 882.7 | 11.53 |
| 2009/1/5   | 48.81 | 48.61 | 72321.84 | 42706.34 | 6.07 | 101.3  | 117.21 | 860.9 | 11.31 |
| 2009/1/6   | 48.58 | 48.56 | 72321.84 | 42706.34 | 5.98 | 99.81  | 117.21 | 869.7 | 11.49 |
| 2009/1/7   | 42.63 | 42.75 | 72321.84 | 42706.34 | 5.87 | 98.61  | 117.21 | 845.6 | 11.15 |
| 2009/1/8   | 41.7  | 41.68 | 72321.84 | 42706.34 | 5.58 | 97.84  | 117.21 | 858.6 | 11.15 |
| 2009/1/9   | 40.83 | 40.69 | 72321.84 | 42706.34 | 5.52 | 98.2   | 117.21 | 859   | 11.37 |
| 2009/1/12  | 37.59 | 37.65 | 72321.84 | 42706.34 | 5.54 | 100.47 | 107.11 | 824.7 | 10.8  |
| 2009/1/13  | 37.78 | 37.77 | 72321.84 | 42706.34 | 5.18 | 102.66 | 108.7  | 824.5 | 10.73 |
| 2009/1/14  | 37.28 | 37.43 | 72321.84 | 42706.34 | 4.97 | 101.9  | 107.43 | 812.6 | 10.53 |
| 2009/1/15  | 35.4  | 35.41 | 72321.84 | 42706.34 | 4.84 | 101.7  | 105.76 | 811.6 | 10.49 |
| 2009/1/16  | 36.51 | 35.38 | 72321.84 | 42706.34 | 4.8  | 101.11 | 103.12 | 844.2 | 11.27 |
| 2009/1/20  | 38.74 | 38.57 | 72321.84 | 42706.34 | 4.64 | 106.91 | 106    | 859.4 | 11.21 |
| 2009/1/21  | 43.55 | 42.56 | 72321.84 | 42706.34 | 4.78 | 106.65 | 111.03 | 854.5 | 11.35 |
| 2009/1/22  | 43.67 | 42.33 | 72321.84 | 42706.34 | 4.68 | 107.34 | 109.56 | 863.5 | 11.39 |
| 2009/1/23  | 46.47 | 45.12 | 72321.84 | 42706.34 | 4.52 | 107.88 | 110.68 | 901.1 | 11.97 |
| 2009/1/26  | 45.73 | 46.5  | 72321.84 | 42706.34 | 4.49 | 106.46 | 110.34 | 914.2 | 12.15 |
| 2009/1/27  | 41.58 | 41.67 | 72321.84 | 42706.34 | 4.5  | 105.32 | 106.36 | 904.8 | 12.22 |
| 2009/1/28  | 42.16 | 42.04 | 72321.84 | 42706.34 | 4.48 | 104.47 | 105.1  | 893.2 | 12    |
| 2009/1/29  | 41.44 | 41.58 | 72321.84 | 42706.34 | 4.58 | 104.1  | 101.59 | 909.9 | 12.19 |
| 2009/1/30  | 41.68 | 41.73 | 72321.84 | 42706.34 | 4.42 | 102.39 | 98.89  | 932.1 | 12.62 |
| 2009/2/2   | 40.08 | 41.35 | 72813.55 | 42765.25 | 4.56 | 104.65 | 95.66  | 911   | 12.48 |



|           |       |       |          |          |      |        |        |        |       |
|-----------|-------|-------|----------|----------|------|--------|--------|--------|-------|
| 2009/2/3  | 40.78 | 40.87 | 72813.55 | 42765.25 | 4.51 | 103.32 | 95.94  | 896.2  | 12.36 |
| 2009/2/4  | 40.32 | 40.27 | 72813.55 | 42765.25 | 4.6  | 103.24 | 95.16  | 906    | 12.54 |
| 2009/2/5  | 41.17 | 41.15 | 72813.55 | 42765.25 | 4.64 | 102.25 | 94.39  | 918.1  | 12.82 |
| 2009/2/6  | 40.17 | 40.24 | 72813.55 | 42765.25 | 4.77 | 101.04 | 92.07  | 918.1  | 13.23 |
| 2009/2/9  | 39.56 | 39.58 | 72813.55 | 42765.25 | 4.81 | 100.26 | 92.78  | 896.5  | 12.9  |
| 2009/2/10 | 37.55 | 37.54 | 72813.55 | 42765.25 | 4.54 | 102.71 | 92.44  | 918.1  | 13.21 |
| 2009/2/11 | 35.94 | 35.93 | 72813.55 | 42765.25 | 4.53 | 103.79 | 95.41  | 948.5  | 13.6  |
| 2009/2/12 | 33.98 | 34.03 | 72813.55 | 42765.25 | 4.49 | 104.7  | 99.59  | 953.2  | 13.59 |
| 2009/2/13 | 37.51 | 37.63 | 72813.55 | 42765.25 | 4.45 | 104.09 | 98.99  | 946.3  | 13.71 |
| 2009/2/17 | 34.93 | 34.96 | 72813.55 | 42765.25 | 4.2  | 104.92 | 97.94  | 971.7  | 14.1  |
| 2009/2/18 | 34.62 | 34.67 | 72813.55 | 42765.25 | 4.21 | 105.11 | 95.62  | 982.4  | 14.38 |
| 2009/2/19 | 39.48 | 39.6  | 72813.55 | 42765.25 | 4.08 | 104.5  | 95.26  | 980.8  | 14.02 |
| 2009/2/20 | 38.94 | 39.35 | 72813.55 | 42765.25 | 4.01 | 103.55 | 96.67  | 1006.6 | 14.58 |
| 2009/2/23 | 38.44 | 37.66 | 72813.55 | 42765.25 | 4.1  | 103.12 | 96.67  | 999.3  | 14.53 |
| 2009/2/24 | 39.96 | 38.86 | 72813.55 | 42765.25 | 4.24 | 103.14 | 94.54  | 973.7  | 14.07 |
| 2009/2/25 | 42.5  | 41.64 | 72813.55 | 42765.25 | 4.06 | 105.16 | 94.76  | 970.4  | 13.95 |
| 2009/2/26 | 45.22 | 43.18 | 72813.55 | 42765.25 | 4.08 | 104.33 | 97.28  | 946.5  | 13.02 |
| 2009/2/27 | 44.76 | 44.15 | 72813.55 | 42765.25 | 4.2  | 104.35 | 97.34  | 946.5  | 13.15 |
| 2009/3/2  | 40.15 | 40.07 | 72673.89 | 43068.27 | 4.15 | 106.27 | 95.14  | 943.9  | 13.11 |
| 2009/3/3  | 41.65 | 41.57 | 72673.89 | 43068.27 | 4.28 | 106.29 | 95.5   | 917.2  | 12.75 |
| 2009/3/4  | 45.38 | 45.28 | 72673.89 | 43068.27 | 4.34 | 105.25 | 95.87  | 910.4  | 12.95 |
| 2009/3/5  | 43.61 | 43.54 | 72673.89 | 43068.27 | 4.09 | 105.8  | 95.79  | 931.8  | 13.16 |
| 2009/3/6  | 45.52 | 45.43 | 72673.89 | 43068.27 | 3.95 | 105.97 | 95.78  | 946.9  | 13.37 |
| 2009/3/9  | 47.07 | 47.01 | 72673.89 | 43068.27 | 3.87 | 108.41 | 95.78  | 922.3  | 12.98 |
| 2009/3/10 | 45.71 | 45.68 | 72673.89 | 43068.27 | 3.84 | 108.66 | 99.48  | 900    | 12.58 |
| 2009/3/11 | 42.33 | 42.46 | 72673.89 | 43068.27 | 3.8  | 107.65 | 101.23 | 915    | 12.85 |
| 2009/3/12 | 47.03 | 46.91 | 72673.89 | 43068.27 | 4    | 107.16 | 100.43 | 928.3  | 12.99 |
| 2009/3/13 | 46.25 | 46.22 | 72673.89 | 43068.27 | 3.93 | 106.85 | 100.48 | 934.5  | 13.27 |
| 2009/3/16 | 47.35 | 47.33 | 72673.89 | 43068.27 | 3.85 | 106.13 | 99.1   | 926.2  | 12.95 |
| 2009/3/17 | 49.16 | 48.97 | 72673.89 | 43068.27 | 3.81 | 106.36 | 100.74 | 921.1  | 12.73 |
| 2009/3/18 | 48.14 | 48.12 | 72673.89 | 43068.27 | 3.68 | 104.44 | 101.64 | 893.2  | 11.99 |
| 2009/3/19 | 51.61 | 51.46 | 72673.89 | 43068.27 | 4.17 | 102.89 | 101.05 | 962.8  | 13.57 |
| 2009/3/20 | 51.06 | 51.55 | 72673.89 | 43068.27 | 4.23 | 103.44 | 100.36 | 960.3  | 13.89 |
| 2009/3/23 | 53.8  | 53.05 | 72673.89 | 43068.27 | 4.29 | 102.61 | 100.89 | 956.5  | 13.93 |
| 2009/3/24 | 53.98 | 53.36 | 72673.89 | 43068.27 | 4.35 | 101.65 | 100.12 | 927.7  | 13.41 |
| 2009/3/25 | 52.77 | 52.24 | 72673.89 | 43068.27 | 4.33 | 102.66 | 99.08  | 939.8  | 13.49 |
| 2009/3/26 | 54.34 | 53.87 | 72673.89 | 43068.27 | 3.95 | 103.28 | 99.97  | 944.1  | 13.67 |
| 2009/3/27 | 52.38 | 52.41 | 72673.89 | 43068.27 | 3.63 | 104.31 | 101.33 | 927.1  | 13.31 |
| 2009/3/30 | 48.41 | 48.49 | 72673.89 | 43068.27 | 3.74 | 104.7  | 101.55 | 919.5  | 13.09 |
| 2009/3/31 | 49.66 | 49.64 | 72673.89 | 43068.27 | 3.78 | 104.27 | 100.56 | 926.7  | 13.04 |
| 2009/4/1  | 48.39 | 48.46 | 72909.67 | 42397.33 | 3.7  | 103.3  | 99.97  | 929.4  | 13.03 |
| 2009/4/2  | 52.64 | 52.61 | 72909.67 | 42397.33 | 3.78 | 101.37 | 99     | 910.6  | 13.08 |
| 2009/4/3  | 52.51 | 52.52 | 72909.67 | 42397.33 | 3.8  | 100.74 | 99.09  | 899    | 12.79 |
| 2009/4/6  | 51.05 | 51.1  | 72909.67 | 42397.33 | 3.73 | 101.28 | 98.25  | 874.4  | 12.17 |
| 2009/4/7  | 49.15 | 49.13 | 72909.67 | 42397.33 | 3.56 | 101.32 | 98.99  | 885.1  | 12.27 |
| 2009/4/8  | 49.38 | 49.37 | 72909.67 | 42397.33 | 3.63 | 101.58 | 98.22  | 887.6  | 12.39 |
| 2009/4/9  | 52.24 | 52.24 | 72909.67 | 42397.33 | 3.61 | 101.81 | 98.5   | 885    | 12.39 |
| 2009/4/13 | 50.05 | 50.22 | 72909.67 | 42397.33 | 3.63 | 100.57 | 98.69  | 897.6  | 12.83 |
| 2009/4/14 | 49.41 | 49.51 | 72909.67 | 42397.33 | 3.69 | 100.28 | 98.08  | 893.8  | 12.82 |
| 2009/4/15 | 49.25 | 49.26 | 72909.67 | 42397.33 | 3.69 | 99.65  | 97.96  | 895.3  | 12.86 |
| 2009/4/16 | 49.98 | 49.97 | 72909.67 | 42397.33 | 3.6  | 100.08 | 97.33  | 881.5  | 12.31 |
| 2009/4/17 | 50.33 | 50.36 | 72909.67 | 42397.33 | 3.73 | 100.92 | 97.95  | 869.5  | 11.84 |
| 2009/4/20 | 45.88 | 45.82 | 72909.67 | 42397.33 | 3.54 | 102.73 | 99.01  | 889.1  | 12.16 |
| 2009/4/21 | 46.51 | 46.65 | 72909.67 | 42397.33 | 3.51 | 101.77 | 98.22  | 884.4  | 12.12 |

|           |       |       |          |          |      |        |        |       |       |
|-----------|-------|-------|----------|----------|------|--------|--------|-------|-------|
| 2009/4/22 | 48.85 | 47.41 | 72909.67 | 42397.33 | 3.53 | 103.12 | 97.9   | 894.2 | 12.37 |
| 2009/4/23 | 49.62 | 48.46 | 72909.67 | 42397.33 | 3.41 | 101.5  | 98.83  | 908.3 | 12.82 |
| 2009/4/24 | 51.55 | 50.65 | 72909.67 | 42397.33 | 3.3  | 101.88 | 99.47  | 915.8 | 12.99 |
| 2009/4/27 | 50.14 | 49.29 | 72909.67 | 42397.33 | 3.25 | 102.11 | 100.15 | 909.9 | 13.02 |
| 2009/4/28 | 49.92 | 49.01 | 72909.67 | 42397.33 | 3.32 | 102.09 | 99.61  | 895.2 | 12.46 |
| 2009/4/29 | 50.97 | 50.19 | 72909.67 | 42397.33 | 3.4  | 101.22 | 99.51  | 902.2 | 12.81 |
| 2009/4/30 | 51.12 | 50.35 | 72909.67 | 42397.33 | 3.37 | 101.02 | 99.12  | 892.8 | 12.36 |
| 2009/5/1  | 53.2  | 52.18 | 72488.08 | 41029.92 | 3.55 | 100.32 | 99.12  | 889.9 | 12.54 |
| 2009/5/4  | 54.47 | 54.45 | 72488.08 | 41029.92 | 3.73 | 99.49  | 98.56  | 903.9 | 13.15 |
| 2009/5/5  | 53.84 | 53.81 | 72488.08 | 41029.92 | 3.62 | 99.32  | 98.54  | 906.1 | 13.46 |
| 2009/5/6  | 56.34 | 56.29 | 72488.08 | 41029.92 | 3.89 | 98.95  | 98.25  | 912.8 | 13.75 |
| 2009/5/7  | 56.71 | 56.67 | 72488.08 | 41029.92 | 4.08 | 99.52  | 98.25  | 917.4 | 14.07 |
| 2009/5/8  | 58.63 | 58.58 | 72488.08 | 41029.92 | 4.31 | 98.18  | 99.38  | 916.7 | 14    |
| 2009/5/11 | 58.5  | 57.79 | 72488.08 | 41029.92 | 4.3  | 98.98  | 99.38  | 915.4 | 13.95 |
| 2009/5/12 | 58.85 | 58.81 | 72488.08 | 41029.92 | 4.45 | 97.98  | 99.25  | 925.9 | 14.26 |
| 2009/5/13 | 58.02 | 58    | 72488.08 | 41029.92 | 4.33 | 98.72  | 99.6   | 927.9 | 14.06 |
| 2009/5/14 | 58.62 | 58.58 | 72488.08 | 41029.92 | 4.29 | 98.31  | 99.89  | 930.3 | 14.08 |
| 2009/5/15 | 56.34 | 56.52 | 72488.08 | 41029.92 | 4.1  | 98.64  | 99.55  | 933.1 | 14.05 |
| 2009/5/18 | 59.03 | 58.99 | 72488.08 | 41029.92 | 4.14 | 97.53  | 99.23  | 923.5 | 13.87 |
| 2009/5/19 | 59.65 | 59.52 | 72488.08 | 41029.92 | 3.91 | 96.68  | 98.42  | 928.5 | 14.17 |
| 2009/5/21 | 62.04 | 61.45 | 72488.08 | 41029.92 | 3.97 | 94.38  | 97.78  | 939.2 | 14.32 |
| 2009/5/22 | 61.05 | 60.49 | 72488.08 | 41029.92 | 3.6  | 93.9   | 98.57  | 952.8 | 14.49 |
| 2009/5/25 | 61.67 | 61.15 | 72488.08 | 41029.92 | 3.52 | 93.97  | 98.46  | 960.5 | 14.74 |
| 2009/5/26 | 62.45 | 62.48 | 72488.08 | 41029.92 | 3.54 | 93.91  | 98.5   | 955.1 | 14.65 |
| 2009/5/27 | 63.45 | 63.41 | 72488.08 | 41029.92 | 3.54 | 93.72  | 97.51  | 955.2 | 14.92 |
| 2009/5/28 | 65.08 | 65.09 | 72488.08 | 41029.92 | 3.96 | 93.9   | 97.66  | 963.2 | 15.21 |
| 2009/5/29 | 66.31 | 66.31 | 72488.08 | 41029.92 | 3.84 | 92.42  | 97.62  | 980.3 | 15.66 |
| 2009/6/1  | 68.58 | 68.59 | 72646.68 | 42374.17 | 4.25 | 90.54  | 96.51  | 980   | 15.79 |
| 2009/6/2  | 68.55 | 68.58 | 72646.68 | 42374.17 | 4.12 | 89.75  | 96.4   | 984.4 | 16.02 |
| 2009/6/3  | 66.12 | 66.14 | 72646.68 | 42374.17 | 3.77 | 91.33  | 95.44  | 965.6 | 15.33 |
| 2009/6/4  | 68.81 | 68.8  | 72646.68 | 42374.17 | 3.81 | 92.23  | 96.1   | 982.3 | 15.91 |
| 2009/6/5  | 68.44 | 68.43 | 72646.68 | 42374.17 | 3.87 | 93.13  | 98.39  | 962.6 | 15.41 |
| 2009/6/8  | 68.09 | 68.05 | 72646.68 | 42374.17 | 3.73 | 92.77  | 98.52  | 952.5 | 14.97 |
| 2009/6/9  | 70.01 | 70.02 | 72646.68 | 42374.17 | 3.73 | 91.22  | 95.96  | 954.7 | 15.16 |
| 2009/6/10 | 71.33 | 71.38 | 72646.68 | 42374.17 | 3.71 | 91.05  | 95.79  | 954.7 | 15.24 |
| 2009/6/11 | 72.68 | 72.69 | 72646.68 | 42374.17 | 3.93 | 89.81  | 95.79  | 962   | 15.51 |
| 2009/6/12 | 72.04 | 72.13 | 72646.68 | 42374.17 | 3.86 | 90.52  | 95.79  | 940.7 | 14.89 |
| 2009/6/15 | 70.62 | 70.54 | 72646.68 | 42374.17 | 4.18 | 91.29  | 95.42  | 927.5 | 14.05 |
| 2009/6/16 | 70.47 | 70.47 | 72646.68 | 42374.17 | 4.09 | 90.77  | 94.69  | 932.2 | 14.15 |
| 2009/6/17 | 71.03 | 71.07 | 72646.68 | 42374.17 | 4.25 | 90.81  | 94.83  | 936   | 14.3  |
| 2009/6/18 | 71.37 | 71.42 | 72646.68 | 42374.17 | 4.09 | 91.09  | 94.85  | 934.6 | 14.26 |
| 2009/6/19 | 69.55 | 69.6  | 72646.68 | 42374.17 | 4.03 | 90.24  | 95.03  | 936.2 | 14.22 |
| 2009/6/22 | 66.93 | 67.09 | 72646.68 | 42374.17 | 3.93 | 91.05  | 94.53  | 921   | 13.72 |
| 2009/6/23 | 69.24 | 68.81 | 72646.68 | 42374.17 | 3.88 | 90.46  | 94.24  | 924.3 | 13.86 |
| 2009/6/24 | 68.67 | 68.14 | 72646.68 | 42374.17 | 3.76 | 90.68  | 94.18  | 934.4 | 13.93 |
| 2009/6/25 | 70.23 | 69.7  | 72646.68 | 42374.17 | 3.84 | 90.89  | 95.07  | 939.5 | 14.02 |
| 2009/6/26 | 69.16 | 69.16 | 72646.68 | 42374.17 | 3.95 | 90.07  | 94.57  | 941   | 14.14 |
| 2009/6/29 | 71.49 | 71.47 | 72646.68 | 42374.17 | 3.94 | 89.91  | 93.8   | 940.7 | 13.96 |
| 2009/6/30 | 69.89 | 69.82 | 72646.68 | 42374.17 | 3.84 | 90.4   | 92.93  | 927.4 | 13.59 |
| 2009/7/1  | 69.31 | 69.32 | 73533.4  | 42759.56 | 3.8  | 90.42  | 93.88  | 941.3 | 13.75 |
| 2009/7/2  | 66.73 | 66.68 | 73533.4  | 42759.56 | 3.62 | 91.24  | 94.31  | 931   | 13.4  |
| 2009/7/6  | 64.05 | 64.06 | 73533.4  | 42759.56 | 3.49 | 91.61  | 94.91  | 924.3 | 13.23 |
| 2009/7/7  | 62.93 | 62.88 | 73533.4  | 42759.56 | 3.43 | 92.44  | 94.6   | 929.1 | 13.21 |
| 2009/7/8  | 60.14 | 60.15 | 73533.4  | 42759.56 | 3.35 | 92.87  | 93.98  | 909.3 | 12.85 |

|           |       |       |          |          |      |       |       |        |       |
|-----------|-------|-------|----------|----------|------|-------|-------|--------|-------|
| 2009/7/9  | 60.41 | 60.36 | 73533.4  | 42759.56 | 3.41 | 91.24 | 93.78 | 916.2  | 12.93 |
| 2009/7/10 | 59.89 | 59.93 | 73533.4  | 42759.56 | 3.37 | 91.96 | 92.37 | 912.5  | 12.64 |
| 2009/7/13 | 59.69 | 59.69 | 73533.4  | 42759.56 | 3.26 | 91.8  | 90.61 | 922.5  | 12.79 |
| 2009/7/14 | 59.52 | 59.62 | 73533.4  | 42759.56 | 3.43 | 91.34 | 91.01 | 922.8  | 12.86 |
| 2009/7/15 | 61.54 | 61.49 | 73533.4  | 42759.56 | 3.28 | 90.78 | 91.81 | 939.4  | 13.2  |
| 2009/7/16 | 62.02 | 62.07 | 73533.4  | 42759.56 | 3.67 | 90.67 | 92.75 | 935.4  | 13.23 |
| 2009/7/17 | 63.56 | 63.56 | 73533.4  | 42759.56 | 3.67 | 91.27 | 92.88 | 937.5  | 13.4  |
| 2009/7/20 | 63.98 | 63.93 | 73533.4  | 42759.56 | 3.69 | 90.08 | 93.28 | 948.8  | 13.62 |
| 2009/7/21 | 64.72 | 64.81 | 73533.4  | 42759.56 | 3.71 | 90.62 | 93.82 | 946.9  | 13.47 |
| 2009/7/22 | 65.4  | 64.58 | 73533.4  | 42759.56 | 3.79 | 90.58 | 94.96 | 953.3  | 13.69 |
| 2009/7/23 | 67.16 | 66.1  | 73533.4  | 42759.56 | 3.55 | 90.41 | 93.83 | 954.8  | 13.76 |
| 2009/7/24 | 68.05 | 66.96 | 73533.4  | 42759.56 | 3.7  | 90.78 | 93.61 | 953.1  | 13.87 |
| 2009/7/27 | 68.38 | 68.34 | 73533.4  | 42759.56 | 3.6  | 90.4  | 95.15 | 953.5  | 13.98 |
| 2009/7/28 | 67.23 | 67.24 | 73533.4  | 42759.56 | 3.54 | 90.76 | 95.06 | 939.1  | 13.73 |
| 2009/7/29 | 63.35 | 63.42 | 73533.4  | 42759.56 | 3.38 | 91.08 | 93.59 | 927.2  | 13.25 |
| 2009/7/30 | 66.94 | 66.9  | 73533.4  | 42759.56 | 3.74 | 90.38 | 92.07 | 934.9  | 13.48 |
| 2009/7/31 | 69.45 | 69.26 | 73533.4  | 42759.56 | 3.65 | 89.21 | 93.75 | 953.7  | 13.93 |
| 2009/8/3  | 71.58 | 71.59 | 73009.07 | 42349.33 | 4.03 | 88.13 | 92.45 | 956.6  | 14.25 |
| 2009/8/4  | 71.42 | 71.4  | 73009.07 | 42349.33 | 4    | 88.15 | 91.87 | 967.5  | 14.69 |
| 2009/8/5  | 71.97 | 71.97 | 73009.07 | 42349.33 | 4.04 | 87.84 | 91.78 | 964.2  | 14.75 |
| 2009/8/6  | 71.94 | 71.96 | 73009.07 | 42349.33 | 3.74 | 88.96 | 91.19 | 960.7  | 14.64 |
| 2009/8/7  | 70.93 | 70.97 | 73009.07 | 42349.33 | 3.67 | 89.45 | 91.49 | 957.3  | 14.66 |
| 2009/8/10 | 70.6  | 70.59 | 73009.07 | 42349.33 | 3.64 | 90.53 | 91.81 | 945    | 14.4  |
| 2009/8/11 | 69.45 | 69.46 | 73009.07 | 42349.33 | 3.54 | 90.59 | 92.41 | 945.8  | 14.34 |
| 2009/8/12 | 70.16 | 70.08 | 73009.07 | 42349.33 | 3.48 | 90.49 | 90.07 | 950.7  | 14.58 |
| 2009/8/13 | 70.52 | 70.57 | 73009.07 | 42349.33 | 3.34 | 90.07 | 90.85 | 954.7  | 14.98 |
| 2009/8/14 | 67.51 | 67.51 | 73009.07 | 42349.33 | 3.24 | 90.22 | 92.32 | 947    | 14.72 |
| 2009/8/17 | 66.75 | 66.72 | 73009.07 | 42349.33 | 3.16 | 91.36 | 91.49 | 934.3  | 14.01 |
| 2009/8/18 | 69.19 | 69.22 | 73009.07 | 42349.33 | 3.1  | 90.13 | 92.37 | 937.7  | 13.99 |
| 2009/8/19 | 72.42 | 72.54 | 73009.07 | 42349.33 | 3.12 | 90.24 | 92.01 | 943.3  | 13.87 |
| 2009/8/20 | 72.54 | 72.4  | 73009.07 | 42349.33 | 2.95 | 90.44 | 92.35 | 940.3  | 13.88 |
| 2009/8/21 | 73.89 | 73.12 | 73009.07 | 42349.33 | 2.8  | 90.42 | 91.88 | 953.2  | 14.16 |
| 2009/8/24 | 74.37 | 73.68 | 73009.07 | 42349.33 | 2.92 | 90.92 | 93.05 | 942.3  | 14.19 |
| 2009/8/25 | 72.05 | 71.6  | 73009.07 | 42349.33 | 2.88 | 91.32 | 93.66 | 944.5  | 14.31 |
| 2009/8/26 | 71.43 | 71.38 | 73009.07 | 42349.33 | 2.91 | 91.94 | 94.24 | 944.3  | 14.25 |
| 2009/8/27 | 72.49 | 72.49 | 73009.07 | 42349.33 | 2.84 | 91.74 | 94.24 | 945.5  | 14.22 |
| 2009/8/28 | 72.74 | 72.72 | 73009.07 | 42349.33 | 3.03 | 91.74 | 94.04 | 957    | 14.78 |
| 2009/8/31 | 69.96 | 69.97 | 73009.07 | 42349.33 | 2.98 | 91.65 | 93.86 | 951.7  | 14.9  |
| 2009/9/1  | 68.05 | 68.11 | 73470.28 | 42580.75 | 2.82 | 92.45 | 93.14 | 954.7  | 15.04 |
| 2009/9/2  | 68.05 | 68.03 | 73470.28 | 42580.75 | 2.72 | 91.8  | 93.83 | 976.6  | 15.34 |
| 2009/9/3  | 67.96 | 67.9  | 73470.28 | 42580.75 | 2.51 | 91.43 | 93.4  | 995.8  | 16.27 |
| 2009/9/4  | 68.02 | 67.95 | 73470.28 | 42580.75 | 2.73 | 91.1  | 93.79 | 994.9  | 16.26 |
| 2009/9/8  | 71.1  | 71.08 | 73470.28 | 42580.75 | 2.81 | 90.51 | 94.07 | 997.9  | 16.49 |
| 2009/9/9  | 71.31 | 71.27 | 73470.28 | 42580.75 | 2.83 | 90.25 | 94.35 | 995.3  | 16.44 |
| 2009/9/10 | 71.94 | 71.95 | 73470.28 | 42580.75 | 3.26 | 89.65 | 94.92 | 995.4  | 16.65 |
| 2009/9/11 | 69.29 | 69.34 | 73470.28 | 42580.75 | 2.96 | 89.58 | 94.35 | 1004.9 | 16.68 |
| 2009/9/14 | 68.86 | 68.86 | 73470.28 | 42580.75 | 3.3  | 90.07 | 94.64 | 999.9  | 16.6  |
| 2009/9/15 | 70.93 | 70.81 | 73470.28 | 42580.75 | 3.32 | 90.58 | 94    | 1005   | 16.98 |
| 2009/9/16 | 72.51 | 72.5  | 73470.28 | 42580.75 | 3.76 | 90.6  | 95.93 | 1018.9 | 17.41 |
| 2009/9/17 | 72.47 | 72.48 | 73470.28 | 42580.75 | 3.46 | 90.79 | 96.36 | 1012.3 | 17.24 |
| 2009/9/18 | 72.04 | 71.95 | 73470.28 | 42580.75 | 3.78 | 91.78 | 97.75 | 1009.2 | 17.04 |
| 2009/9/21 | 69.71 | 69.74 | 73470.28 | 42580.75 | 3.58 | 92.15 | 98.59 | 1003.7 | 16.86 |
| 2009/9/22 | 71.55 | 71.5  | 73470.28 | 42580.75 | 3.61 | 91.31 | 98.25 | 1014.2 | 17.09 |
| 2009/9/23 | 68.97 | 68.74 | 73470.28 | 42580.75 | 3.86 | 91.46 | 98.62 | 1013   | 16.89 |

|            |       |       |          |          |      |       |        |        |       |
|------------|-------|-------|----------|----------|------|-------|--------|--------|-------|
| 2009/9/24  | 65.89 | 65.74 | 73470.28 | 42580.75 | 3.96 | 92.97 | 98.57  | 997.5  | 16.27 |
| 2009/9/25  | 66.02 | 65.91 | 73470.28 | 42580.75 | 3.99 | 93.74 | 100.17 | 990.2  | 16.04 |
| 2009/9/28  | 66.84 | 66.69 | 73470.28 | 42580.75 | 3.73 | 94.03 | 101.08 | 992.5  | 16.17 |
| 2009/9/29  | 66.71 | 66.56 | 73470.28 | 42580.75 | 4.88 | 93.57 | 101.43 | 993.1  | 16.16 |
| 2009/9/30  | 70.61 | 70.46 | 73470.28 | 42580.75 | 4.84 | 93.29 | 100.52 | 1008   | 16.64 |
| 2009/10/1  | 70.82 | 70.67 | 73894.3  | 43326.41 | 4.47 | 93.62 | 100.94 | 999.5  | 16.42 |
| 2009/10/2  | 69.95 | 69.8  | 73894.3  | 43326.41 | 4.72 | 93.68 | 101.4  | 1003.2 | 16.21 |
| 2009/10/5  | 70.41 | 70.26 | 73894.3  | 43326.41 | 4.99 | 93.74 | 101.15 | 1016.7 | 16.51 |
| 2009/10/6  | 70.88 | 70.71 | 73894.3  | 43326.41 | 4.88 | 93.88 | 101.43 | 1038.6 | 17.27 |
| 2009/10/7  | 69.57 | 69.6  | 73894.3  | 43326.41 | 4.9  | 93.58 | 102.25 | 1043.3 | 17.48 |
| 2009/10/8  | 71.69 | 71.69 | 73894.3  | 43326.41 | 4.96 | 92.95 | 101.84 | 1055.4 | 17.51 |
| 2009/10/9  | 71.77 | 71.75 | 73894.3  | 43326.41 | 4.77 | 94.29 | 102.32 | 1047.8 | 17.68 |
| 2009/10/12 | 73.27 | 73.24 | 73894.3  | 43326.41 | 4.88 | 94.53 | 104.06 | 1056.7 | 17.81 |
| 2009/10/13 | 74.15 | 74.1  | 73894.3  | 43326.41 | 4.59 | 93.83 | 104.14 | 1064.2 | 17.83 |
| 2009/10/14 | 75.18 | 75.2  | 73894.3  | 43326.41 | 4.44 | 93.48 | 103.13 | 1063.9 | 17.89 |
| 2009/10/15 | 77.58 | 77.55 | 73894.3  | 43326.41 | 4.48 | 91.83 | 102.68 | 1049.8 | 17.4  |
| 2009/10/16 | 78.53 | 78.54 | 73894.3  | 43326.41 | 4.78 | 91.29 | 101.44 | 1050.7 | 17.42 |
| 2009/10/19 | 79.61 | 79.47 | 73894.3  | 43326.41 | 4.84 | 90.93 | 101.59 | 1057.3 | 17.63 |
| 2009/10/20 | 79.09 | 78.87 | 73894.3  | 43326.41 | 5.16 | 91.16 | 101.37 | 1057.8 | 17.56 |
| 2009/10/21 | 81.37 | 81.03 | 73894.3  | 43326.41 | 5.1  | 90.03 | 100.74 | 1063.7 | 17.5  |
| 2009/10/22 | 81.19 | 80.82 | 73894.3  | 43326.41 | 4.95 | 89.88 | 100.38 | 1057.8 | 17.53 |
| 2009/10/23 | 80.5  | 80.11 | 73894.3  | 43326.41 | 4.79 | 91.61 | 100.19 | 1055.6 | 17.71 |
| 2009/10/26 | 78.68 | 78.61 | 73894.3  | 43326.41 | 4.51 | 91.55 | 102.58 | 1042.1 | 17.08 |
| 2009/10/27 | 79.55 | 79.45 | 73894.3  | 43326.41 | 4.56 | 91.2  | 102.12 | 1034.7 | 16.54 |
| 2009/10/28 | 77.46 | 77.39 | 73894.3  | 43326.41 | 4.29 | 91.16 | 101.59 | 1030.5 | 16.24 |
| 2009/10/29 | 79.87 | 79.84 | 73894.3  | 43326.41 | 5.06 | 90.19 | 100.53 | 1047.1 | 16.66 |
| 2009/10/30 | 77    | 77.04 | 73894.3  | 43326.41 | 5.05 | 90.83 | 100.92 | 1040.4 | 16.26 |
| 2009/11/2  | 78.13 | 78.08 | 73985.8  | 42659.97 | 4.82 | 91.28 | 101.46 | 1059.9 | 16.45 |
| 2009/11/3  | 79.6  | 79.58 | 73985.8  | 42659.97 | 4.92 | 91.11 | 101.72 | 1084.6 | 17.22 |
| 2009/11/4  | 80.4  | 80.3  | 73985.8  | 42659.97 | 4.73 | 90.46 | 101.72 | 1092.4 | 17.46 |
| 2009/11/5  | 79.62 | 79.64 | 73985.8  | 42659.97 | 4.78 | 90.31 | 100.79 | 1090   | 17.4  |
| 2009/11/6  | 77.43 | 77.4  | 73985.8  | 42659.97 | 4.6  | 90.17 | 100.6  | 1097.5 | 17.4  |
| 2009/11/9  | 79.43 | 79.44 | 73985.8  | 42659.97 | 4.67 | 89.37 | 100.21 | 1103.4 | 17.57 |
| 2009/11/10 | 79.05 | 79.01 | 73985.8  | 42659.97 | 4.47 | 89.44 | 101.3  | 1106.3 | 17.32 |
| 2009/11/11 | 79.28 | 79.16 | 73985.8  | 42659.97 | 4.5  | 90.36 | 100.84 | 1114.6 | 17.54 |
| 2009/11/12 | 76.94 | 77.25 | 73985.8  | 42659.97 | 4.37 | 90.35 | 102.25 | 1106.6 | 17.27 |
| 2009/11/13 | 76.35 | 76.34 | 73985.8  | 42659.97 | 4.39 | 89.79 | 100.83 | 1116.7 | 17.38 |
| 2009/11/16 | 78.9  | 78.91 | 73985.8  | 42659.97 | 4.61 | 89.05 | 101.25 | 1139.2 | 18.4  |
| 2009/11/17 | 79.14 | 79.08 | 73985.8  | 42659.97 | 4.53 | 89.08 | 100.4  | 1139.4 | 18.39 |
| 2009/11/18 | 79.58 | 79.55 | 73985.8  | 42659.97 | 4.25 | 89.43 | 100.5  | 1141.2 | 18.42 |
| 2009/11/19 | 77.46 | 77.47 | 73985.8  | 42659.97 | 4.34 | 89.86 | 101.19 | 1141.9 | 18.52 |
| 2009/11/20 | 76.72 | 76.83 | 73985.8  | 42659.97 | 4.42 | 90.78 | 101.16 | 1151.2 | 18.51 |
| 2009/11/23 | 77.56 | 76.49 | 73985.8  | 42659.97 | 4.47 | 90.18 | 101.46 | 1159.6 | 18.54 |
| 2009/11/24 | 76.02 | 74.88 | 73985.8  | 42659.97 | 4.49 | 90.31 | 101.67 | 1168.2 | 18.57 |
| 2009/11/25 | 77.96 | 77.25 | 73985.8  | 42659.97 | 5.16 | 89.66 | 100.75 | 1193.9 | 18.86 |
| 2009/11/27 | 76.05 | 75.95 | 73985.8  | 42659.97 | 5.19 | 90.84 | 99.61  | 1177.8 | 18.35 |
| 2009/11/30 | 77.28 | 77.19 | 73985.8  | 42659.97 | 4.85 | 91.09 | 101.37 | 1178.1 | 18.55 |
| 2009/12/1  | 78.37 | 78.39 | 73687.63 | 44884.17 | 4.76 | 90.84 | 101.04 | 1199.9 | 19.13 |
| 2009/12/2  | 76.6  | 76.62 | 73687.63 | 44884.17 | 4.53 | 90.74 | 100.66 | 1222.7 | 19.38 |
| 2009/12/3  | 76.46 | 76.42 | 73687.63 | 44884.17 | 4.46 | 91.22 | 99.49  | 1202.6 | 18.7  |
| 2009/12/4  | 75.47 | 75.41 | 73687.63 | 44884.17 | 4.59 | 91.6  | 100.04 | 1161.8 | 18.48 |
| 2009/12/7  | 73.93 | 73.89 | 73687.63 | 44884.17 | 4.97 | 91.77 | 100.35 | 1164.3 | 18.19 |
| 2009/12/8  | 72.62 | 72.59 | 73687.63 | 44884.17 | 5.11 | 92.65 | 98.27  | 1132.1 | 17.75 |
| 2009/12/9  | 70.67 | 70.67 | 73687.63 | 44884.17 | 4.9  | 92.79 | 97.15  | 1125.5 | 17.35 |

|            |       |       |          |          |      |        |        |        |       |
|------------|-------|-------|----------|----------|------|--------|--------|--------|-------|
| 2009/12/10 | 70.54 | 70.54 | 73687.63 | 44884.17 | 5.3  | 92.69  | 97.46  | 1133.8 | 17.31 |
| 2009/12/11 | 69.87 | 69.86 | 73687.63 | 44884.17 | 5.16 | 92.81  | 98.56  | 1115.4 | 17.16 |
| 2009/12/14 | 69.51 | 69.48 | 73687.63 | 44884.17 | 5.33 | 92.51  | 99.46  | 1127   | 17.44 |
| 2009/12/15 | 70.69 | 70.62 | 73687.63 | 44884.17 | 5.52 | 92.77  | 99.36  | 1126.7 | 17.4  |
| 2009/12/16 | 72.66 | 72.64 | 73687.63 | 44884.17 | 5.46 | 92.38  | 98.97  | 1133.5 | 17.59 |
| 2009/12/17 | 72.65 | 72.58 | 73687.63 | 44884.17 | 5.77 | 93.41  | 98.38  | 1108.7 | 17.1  |
| 2009/12/18 | 73.36 | 73.3  | 73687.63 | 44884.17 | 5.78 | 93.37  | 97.44  | 1112.7 | 17.3  |
| 2009/12/21 | 72.47 | 72.71 | 73687.63 | 44884.17 | 5.67 | 94.06  | 98.58  | 1093.4 | 17    |
| 2009/12/22 | 74.4  | 73.48 | 73687.63 | 44884.17 | 5.72 | 94.51  | 99.18  | 1083.6 | 17.01 |
| 2009/12/23 | 76.67 | 76.03 | 73687.63 | 44884.17 | 5.82 | 94.57  | 99.83  | 1097.8 | 17.18 |
| 2009/12/24 | 78.05 | 76.83 | 73687.63 | 44884.17 | 5.64 | 94.51  | 101.59 | 1104.3 | 17.46 |
| 2009/12/28 | 78.77 | 78.67 | 73687.63 | 44884.17 | 5.99 | 94.3   | 102.78 | 1105   | 17.4  |
| 2009/12/29 | 78.87 | 78.87 | 73687.63 | 44884.17 | 5.81 | 94.89  | 101.29 | 1098.5 | 17.13 |
| 2009/12/30 | 79.28 | 79.35 | 73687.63 | 44884.17 | 5.71 | 93.85  | 101.1  | 1098.7 | 16.76 |
| 2009/12/31 | 79.36 | 79.39 | 73687.63 | 44884.17 | 5.57 | 93.39  | 97.93  | 1097.8 | 16.89 |
| 2010/1/4   | 81.51 | 81.52 | 73847.91 | 42817.74 | 5.88 | 93.25  | 97.93  | 1123.3 | 17.6  |
| 2010/1/5   | 81.77 | 81.74 | 73847.91 | 42817.74 | 5.64 | 93.82  | 97.93  | 1124.1 | 17.85 |
| 2010/1/6   | 83.18 | 83.12 | 73847.91 | 42817.74 | 6.01 | 93.68  | 97.93  | 1133.6 | 18.19 |
| 2010/1/7   | 82.66 | 82.6  | 73847.91 | 42817.74 | 5.81 | 94.16  | 97.93  | 1125.6 | 18.1  |
| 2010/1/8   | 82.75 | 82.74 | 73847.91 | 42817.74 | 5.75 | 93.65  | 97.93  | 1138.7 | 18.42 |
| 2010/1/11  | 82.52 | 82.54 | 73847.91 | 42817.74 | 5.45 | 93.11  | 100.42 | 1152.2 | 18.67 |
| 2010/1/12  | 80.79 | 80.79 | 73847.91 | 42817.74 | 5.59 | 92.81  | 100.8  | 1129.7 | 18.28 |
| 2010/1/13  | 79.65 | 79.66 | 73847.91 | 42817.74 | 5.73 | 92.16  | 99.19  | 1141.7 | 18.52 |
| 2010/1/14  | 79.39 | 79.35 | 73847.91 | 42817.74 | 5.59 | 91.85  | 99.51  | 1138.4 | 18.56 |
| 2010/1/15  | 78    | 77.96 | 73847.91 | 42817.74 | 5.69 | 92.26  | 98.84  | 1130.7 | 18.39 |
| 2010/1/19  | 79.02 | 78.98 | 73847.91 | 42817.74 | 5.56 | 91.7   | 98.4   | 1134   | 18.67 |
| 2010/1/20  | 77.62 | 77.42 | 73847.91 | 42817.74 | 5.5  | 92.1   | 98.72  | 1113.1 | 17.9  |
| 2010/1/21  | 76.08 | 75.84 | 73847.91 | 42817.74 | 5.62 | 92.66  | 98.77  | 1091.9 | 17.62 |
| 2010/1/22  | 74.54 | 74.25 | 73847.91 | 42817.74 | 5.82 | 93.14  | 98.5   | 1092.5 | 17.02 |
| 2010/1/25  | 75.26 | 74.9  | 73847.91 | 42817.74 | 5.72 | 92.37  | 98.22  | 1096   | 17.1  |
| 2010/1/26  | 74.71 | 74.67 | 73847.91 | 42817.74 | 5.49 | 92.95  | 96.83  | 1099.3 | 16.83 |
| 2010/1/27  | 73.67 | 73.64 | 73847.91 | 42817.74 | 5.27 | 92.79  | 97.6   | 1088.5 | 16.83 |
| 2010/1/28  | 73.64 | 73.62 | 73847.91 | 42817.74 | 5.14 | 92.98  | 96.57  | 1082.8 | 16.24 |
| 2010/1/29  | 72.89 | 72.85 | 73847.91 | 42817.74 | 5.13 | 93.89  | 96.9   | 1081.8 | 16.23 |
| 2010/2/1   | 74.43 | 74.41 | 74358.02 | 44826.27 | 5.43 | 94.43  | 98.03  | 1100.2 | 16.63 |
| 2010/2/2   | 77.23 | 77.21 | 74358.02 | 44826.27 | 5.45 | 94.33  | 98.89  | 1113.9 | 16.71 |
| 2010/2/3   | 76.98 | 76.96 | 74358.02 | 44826.27 | 5.42 | 94.84  | 99.06  | 1108.3 | 16.37 |
| 2010/2/4   | 73.14 | 73.13 | 74358.02 | 44826.27 | 5.42 | 95.62  | 99.68  | 1068   | 15.27 |
| 2010/2/5   | 71.19 | 71.15 | 74358.02 | 44826.27 | 5.52 | 96.34  | 99.55  | 1065.9 | 15.17 |
| 2010/2/8   | 71.89 | 71.87 | 74358.02 | 44826.27 | 5.4  | 96.7   | 99.65  | 1063.7 | 15.16 |
| 2010/2/9   | 73.75 | 73.71 | 74358.02 | 44826.27 | 5.29 | 95.87  | 100.1  | 1076.3 | 15.44 |
| 2010/2/10  | 74.52 | 74.48 | 74358.02 | 44826.27 | 5.29 | 96.63  | 100.24 | 1078.2 | 15.46 |
| 2010/2/11  | 75.28 | 75.23 | 74358.02 | 44826.27 | 5.4  | 95.95  | 101.1  | 1089.9 | 15.66 |
| 2010/2/12  | 74.13 | 74.11 | 74358.02 | 44826.27 | 5.47 | 96     | 100.2  | 1092   | 15.54 |
| 2010/2/16  | 77.01 | 76.98 | 74358.02 | 44826.27 | 5.31 | 95.43  | 100.31 | 1118.6 | 16.28 |
| 2010/2/17  | 77.33 | 77.27 | 74358.02 | 44826.27 | 5.39 | 96.15  | 100.29 | 1105.9 | 15.82 |
| 2010/2/18  | 79.06 | 78.97 | 74358.02 | 44826.27 | 5.17 | 97.04  | 101.01 | 1118   | 15.86 |
| 2010/2/19  | 79.81 | 79.77 | 74358.02 | 44826.27 | 5.04 | 97.39  | 102.34 | 1117.5 | 16.32 |
| 2010/2/22  | 80.16 | 80.04 | 74358.02 | 44826.27 | 4.9  | 97.33  | 102.34 | 1115.6 | 16.27 |
| 2010/2/23  | 78.86 | 78.61 | 74358.02 | 44826.27 | 4.78 | 97.7   | 102.34 | 1103.8 | 15.87 |
| 2010/2/24  | 80    | 79.75 | 74358.02 | 44826.27 | 4.82 | 97.8   | 102.32 | 1096.8 | 15.75 |
| 2010/2/25  | 78.17 | 77.99 | 74358.02 | 44826.27 | 4.77 | 98.71  | 103.08 | 1108.7 | 16.17 |
| 2010/2/26  | 79.66 | 79.72 | 74358.02 | 44826.27 | 4.81 | 98.91  | 103.63 | 1118.4 | 16.46 |
| 2010/3/1   | 78.7  | 78.71 | 74704.77 | 44608.25 | 4.68 | 100.68 | 104.58 | 1116.3 | 16.38 |

|           |       |       |          |          |      |        |        |        |       |
|-----------|-------|-------|----------|----------|------|--------|--------|--------|-------|
| 2010/3/2  | 79.68 | 79.62 | 74704.77 | 44608.25 | 4.71 | 100.81 | 106.11 | 1135.1 | 16.9  |
| 2010/3/3  | 80.87 | 80.91 | 74704.77 | 44608.25 | 4.76 | 99.96  | 106.07 | 1136.6 | 17.11 |
| 2010/3/4  | 80.21 | 80.21 | 74704.77 | 44608.25 | 4.58 | 100.4  | 105.84 | 1134.5 | 17.16 |
| 2010/3/5  | 81.5  | 81.5  | 74704.77 | 44608.25 | 4.59 | 99.73  | 105.83 | 1135.2 | 17.35 |
| 2010/3/8  | 81.87 | 81.85 | 74704.77 | 44608.25 | 4.53 | 100.18 | 105.83 | 1121.8 | 17.23 |
| 2010/3/9  | 81.49 | 81.5  | 74704.77 | 44608.25 | 4.52 | 100.64 | 106.32 | 1125.4 | 17.35 |
| 2010/3/10 | 82.09 | 82.07 | 74704.77 | 44608.25 | 4.56 | 100.76 | 107.03 | 1108.2 | 16.9  |
| 2010/3/11 | 82.11 | 82.1  | 74704.77 | 44608.25 | 4.44 | 100.2  | 107.4  | 1112.8 | 17.1  |
| 2010/3/12 | 81.24 | 81.26 | 74704.77 | 44608.25 | 4.4  | 99.27  | 106.83 | 1101.5 | 16.98 |
| 2010/3/15 | 79.8  | 79.79 | 74704.77 | 44608.25 | 4.39 | 100.27 | 106.91 | 1109.4 | 17.11 |
| 2010/3/16 | 81.7  | 81.75 | 74704.77 | 44608.25 | 4.35 | 98.95  | 107.31 | 1112.9 | 17.35 |
| 2010/3/17 | 82.93 | 82.93 | 74704.77 | 44608.25 | 4.3  | 98.53  | 106.85 | 1127.7 | 17.46 |
| 2010/3/18 | 82.2  | 82.16 | 74704.77 | 44608.25 | 4.09 | 99.01  | 106.33 | 1124.1 | 17.33 |
| 2010/3/19 | 80.68 | 80.58 | 74704.77 | 44608.25 | 4.17 | 100.54 | 106.84 | 1107.2 | 16.99 |
| 2010/3/22 | 81.25 | 81.26 | 74704.77 | 44608.25 | 4.08 | 99.89  | 107.94 | 1105.1 | 16.83 |
| 2010/3/23 | 81.91 | 81.68 | 74704.77 | 44608.25 | 4.13 | 100.38 | 107.19 | 1103.4 | 16.93 |
| 2010/3/24 | 80.61 | 80.29 | 74704.77 | 44608.25 | 4.11 | 101.42 | 106.88 | 1089.7 | 16.63 |
| 2010/3/25 | 80.53 | 80.25 | 74704.77 | 44608.25 | 3.98 | 101.83 | 107.1  | 1093.5 | 16.59 |
| 2010/3/26 | 80    | 79.75 | 74704.77 | 44608.25 | 3.87 | 101.31 | 108.53 | 1107   | 16.92 |
| 2010/3/29 | 82.17 | 81.92 | 74704.77 | 44608.25 | 3.84 | 100.75 | 106.95 | 1110.5 | 17.39 |
| 2010/3/30 | 82.37 | 82.14 | 74704.77 | 44608.25 | 3.97 | 100.14 | 107.36 | 1106.1 | 17.39 |
| 2010/3/31 | 83.76 | 83.45 | 74704.77 | 44608.25 | 3.87 | 99.44  | 107.11 | 1111.9 | 17.5  |
| 2010/4/1  | 84.87 | 84.53 | 74646.07 | 44164.33 | 4.09 | 99.06  | 106.17 | 1126.1 | 17.93 |
| 2010/4/5  | 86.62 | 86.36 | 74646.07 | 44164.33 | 4.28 | 99.1   | 106.92 | 1128.6 | 17.98 |
| 2010/4/6  | 86.84 | 86.54 | 74646.07 | 44164.33 | 4.15 | 99.26  | 107.1  | 1135.3 | 18    |
| 2010/4/7  | 85.88 | 85.64 | 74646.07 | 44164.33 | 4.02 | 99.44  | 106.53 | 1146.5 | 18.13 |
| 2010/4/8  | 85.39 | 85.17 | 74646.07 | 44164.33 | 3.91 | 99.16  | 106.75 | 1150.5 | 18.11 |
| 2010/4/9  | 84.92 | 84.6  | 74646.07 | 44164.33 | 4.07 | 98.57  | 105.91 | 1161.4 | 18.4  |
| 2010/4/12 | 84.34 | 84.07 | 74646.07 | 44164.33 | 4.01 | 98.65  | 106.58 | 1152.3 | 18.1  |
| 2010/4/13 | 84.05 | 83.8  | 74646.07 | 44164.33 | 4.16 | 98.51  | 106.76 | 1155.4 | 18.32 |
| 2010/4/14 | 85.84 | 85.62 | 74646.07 | 44164.33 | 4.2  | 97.95  | 106.47 | 1157.5 | 18.43 |
| 2010/4/15 | 85.51 | 85.25 | 74646.07 | 44164.33 | 3.99 | 97.93  | 106.32 | 1155.5 | 18.32 |
| 2010/4/16 | 83.24 | 82.97 | 74646.07 | 44164.33 | 4.04 | 98.63  | 106.41 | 1149.5 | 18.08 |
| 2010/4/19 | 81.45 | 81.52 | 74646.07 | 44164.33 | 3.94 | 98.78  | 107.01 | 1136   | 17.8  |
| 2010/4/20 | 83.45 | 82.98 | 74646.07 | 44164.33 | 3.98 | 98.5   | 106.4  | 1138.8 | 17.39 |
| 2010/4/21 | 83.68 | 82.78 | 74646.07 | 44164.33 | 3.96 | 98.31  | 106.4  | 1147   | 18.06 |
| 2010/4/22 | 83.7  | 82.89 | 74646.07 | 44164.33 | 4.13 | 98.45  | 105.79 | 1139.2 | 18    |
| 2010/4/23 | 85.12 | 84.34 | 74646.07 | 44164.33 | 4.26 | 98.53  | 105.7  | 1154.1 | 18.62 |
| 2010/4/26 | 84.2  | 84.2  | 74646.07 | 44164.33 | 4.26 | 98.03  | 105.63 | 1152.4 | 18.3  |
| 2010/4/27 | 82.44 | 82.43 | 74646.07 | 44164.33 | 4.22 | 99.36  | 106.49 | 1165.5 | 18.22 |
| 2010/4/28 | 83.22 | 83.22 | 74646.07 | 44164.33 | 4.27 | 99.66  | 106.4  | 1172.3 | 18.12 |
| 2010/4/29 | 85.17 | 85.17 | 74646.07 | 44164.33 | 3.98 | 98.78  | 107.03 | 1173.3 | 18.51 |
| 2010/4/30 | 86.15 | 86.07 | 74646.07 | 44164.33 | 3.92 | 99.23  | 105.86 | 1180.3 | 18.65 |
| 2010/5/3  | 86.19 | 86.19 | 74787.37 | 42395.13 | 4    | 99.58  | 105.86 | 1181.1 | 18.75 |
| 2010/5/4  | 82.74 | 82.73 | 74787.37 | 42395.13 | 4.01 | 100.25 | 106.58 | 1167.8 | 17.65 |
| 2010/5/5  | 79.97 | 80    | 74787.37 | 42395.13 | 3.99 | 100.46 | 105.49 | 1175.4 | 17.56 |
| 2010/5/6  | 77.11 | 77.18 | 74787.37 | 42395.13 | 3.93 | 102.68 | 104.14 | 1199.2 | 17.61 |
| 2010/5/7  | 75.11 | 75.1  | 74787.37 | 42395.13 | 4.02 | 102.51 | 105.06 | 1208.3 | 18.4  |
| 2010/5/10 | 76.8  | 76.89 | 74787.37 | 42395.13 | 4.17 | 102.13 | 105.06 | 1202.2 | 18.45 |
| 2010/5/11 | 76.37 | 76.37 | 74787.37 | 42395.13 | 4.13 | 101.64 | 105.52 | 1228.2 | 19.35 |
| 2010/5/12 | 75.65 | 75.65 | 74787.37 | 42395.13 | 4.28 | 102.34 | 104.96 | 1237.1 | 19.5  |
| 2010/5/13 | 74.4  | 74.38 | 74787.37 | 42395.13 | 4.34 | 103.95 | 106.7  | 1235.7 | 19.49 |
| 2010/5/14 | 71.61 | 71.61 | 74787.37 | 42395.13 | 4.31 | 104.4  | 108.38 | 1232.8 | 19.19 |
| 2010/5/17 | 70.08 | 70.08 | 74787.37 | 42395.13 | 4.4  | 104.73 | 107.22 | 1225.5 | 18.9  |

|           |       |       |          |          |      |        |        |        |       |
|-----------|-------|-------|----------|----------|------|--------|--------|--------|-------|
| 2010/5/18 | 69.41 | 69.38 | 74787.37 | 42395.13 | 4.34 | 106.23 | 107.64 | 1210.8 | 18.78 |
| 2010/5/19 | 69.87 | 69.91 | 74787.37 | 42395.13 | 4.16 | 104.98 | 107.92 | 1197.5 | 18.08 |
| 2010/5/20 | 68.01 | 68.28 | 74787.37 | 42395.13 | 4.11 | 105.71 | 107.56 | 1172   | 17.74 |
| 2010/5/21 | 70.04 | 68.03 | 74787.37 | 42395.13 | 4.04 | 104.96 | 106.18 | 1177.1 | 17.56 |
| 2010/5/24 | 70.21 | 68.23 | 74787.37 | 42395.13 | 4.02 | 105.32 | 105.88 | 1194.2 | 17.88 |
| 2010/5/25 | 68.75 | 64.78 | 74787.37 | 42395.13 | 4.05 | 105.12 | 105.59 | 1203.9 | 17.58 |
| 2010/5/26 | 71.51 | 71.52 | 74787.37 | 42395.13 | 4.16 | 105.55 | 105.52 | 1217.3 | 17.98 |
| 2010/5/27 | 74.55 | 74.56 | 74787.37 | 42395.13 | 4.29 | 104.17 | 106.05 | 1209.5 | 18.5  |
| 2010/5/28 | 73.97 | 74    | 74787.37 | 42395.13 | 4.34 | 104.95 | 106.97 | 1213.4 | 18.39 |
| 2010/6/1  | 72.58 | 72.7  | 74868.24 | 45070.36 | 4.25 | 103.84 | 105.38 | 1223   | 18.47 |
| 2010/6/2  | 72.86 | 72.88 | 74868.24 | 45070.36 | 4.42 | 103.77 | 102.76 | 1222   | 18.4  |
| 2010/6/3  | 74.61 | 74.62 | 74868.24 | 45070.36 | 4.69 | 104    | 104.11 | 1206   | 17.95 |
| 2010/6/4  | 71.51 | 71.43 | 74868.24 | 45070.36 | 4.8  | 105.2  | 104.17 | 1220.4 | 17.42 |
| 2010/6/7  | 71.44 | 71.55 | 74868.24 | 45070.36 | 4.92 | 105.08 | 103.25 | 1237.5 | 18.14 |
| 2010/6/8  | 71.99 | 71.88 | 74868.24 | 45070.36 | 4.81 | 105.2  | 103.14 | 1237.3 | 18.28 |
| 2010/6/9  | 74.38 | 74.38 | 74868.24 | 45070.36 | 4.68 | 104.59 | 102.96 | 1230.8 | 18.16 |
| 2010/6/10 | 75.48 | 75.48 | 74868.24 | 45070.36 | 4.65 | 103.41 | 102.76 | 1221.1 | 18.31 |
| 2010/6/11 | 73.78 | 73.89 | 74868.24 | 45070.36 | 4.78 | 104.5  | 102.22 | 1227   | 18.24 |
| 2010/6/14 | 75.12 | 74.99 | 74868.24 | 45070.36 | 5.01 | 103.18 | 102.22 | 1222.3 | 18.28 |
| 2010/6/15 | 76.94 | 76.84 | 74868.24 | 45070.36 | 5.19 | 102.72 | 102.17 | 1233.4 | 18.6  |
| 2010/6/16 | 77.67 | 77.67 | 74868.24 | 45070.36 | 4.98 | 103.31 | 102.73 | 1230.4 | 18.4  |
| 2010/6/17 | 76.79 | 76.82 | 74868.24 | 45070.36 | 5.16 | 102.64 | 103.47 | 1242.9 | 18.74 |
| 2010/6/18 | 77.18 | 77.18 | 74868.24 | 45070.36 | 5    | 102.59 | 103.21 | 1256.1 | 19.18 |
| 2010/6/21 | 77.82 | 77.84 | 74868.24 | 45070.36 | 4.87 | 103    | 103.38 | 1232.2 | 18.83 |
| 2010/6/22 | 77.21 | 77.15 | 74868.24 | 45070.36 | 4.76 | 102.7  | 103.69 | 1239.9 | 18.79 |
| 2010/6/23 | 76.35 | 75.9  | 74868.24 | 45070.36 | 4.8  | 101.65 | 102.78 | 1236.4 | 18.6  |
| 2010/6/24 | 76.51 | 75.96 | 74868.24 | 45070.36 | 4.75 | 101.88 | 102.12 | 1243.6 | 18.69 |
| 2010/6/25 | 78.86 | 78.45 | 74868.24 | 45070.36 | 4.86 | 100.98 | 101.98 | 1256   | 19.06 |
| 2010/6/28 | 78.25 | 78.26 | 74868.24 | 45070.36 | 4.72 | 100.71 | 101.59 | 1239.2 | 18.68 |
| 2010/6/29 | 75.94 | 75.93 | 74868.24 | 45070.36 | 4.55 | 100.96 | 100.62 | 1242.5 | 18.52 |
| 2010/6/30 | 75.63 | 75.59 | 74868.24 | 45070.36 | 4.62 | 101.78 | 100    | 1241   | 18.55 |
| 2010/7/1  | 72.95 | 72.95 | 75060.43 | 43969.41 | 4.85 | 100    | 100.81 | 1208.7 | 17.88 |
| 2010/7/2  | 72.14 | 72.06 | 75060.43 | 43969.41 | 4.69 | 99.78  | 99.26  | 1211.8 | 17.82 |
| 2010/7/6  | 71.98 | 71.96 | 75060.43 | 43969.41 | 4.68 | 100.13 | 99.46  | 1194.5 | 17.8  |
| 2010/7/7  | 74.07 | 74.05 | 75060.43 | 43969.41 | 4.57 | 99.91  | 100.26 | 1206   | 18.12 |
| 2010/7/8  | 75.44 | 75.46 | 75060.43 | 43969.41 | 4.4  | 100.19 | 100.16 | 1198.8 | 17.95 |
| 2010/7/9  | 76.09 | 76.08 | 75060.43 | 43969.41 | 4.4  | 100.72 | 100.65 | 1212.4 | 18.05 |
| 2010/7/12 | 74.95 | 74.93 | 75060.43 | 43969.41 | 4.39 | 100.94 | 101.78 | 1199.4 | 17.92 |
| 2010/7/13 | 77.15 | 77.16 | 75060.43 | 43969.41 | 4.35 | 99.9   | 101.65 | 1211.4 | 18.24 |
| 2010/7/14 | 77.04 | 77.02 | 75060.43 | 43969.41 | 4.31 | 99.36  | 101.28 | 1212.5 | 18.36 |
| 2010/7/15 | 76.62 | 76.67 | 75060.43 | 43969.41 | 4.59 | 98.19  | 100.8  | 1207.1 | 18.32 |
| 2010/7/16 | 76.01 | 75.96 | 75060.43 | 43969.41 | 4.52 | 99.14  | 100.05 | 1193   | 17.77 |
| 2010/7/19 | 76.54 | 76.53 | 75060.43 | 43969.41 | 4.51 | 99.58  | 100.45 | 1182.8 | 17.58 |
| 2010/7/20 | 77.44 | 77.32 | 75060.43 | 43969.41 | 4.59 | 99.28  | 101.23 | 1189   | 17.7  |
| 2010/7/21 | 76.56 | 76.27 | 75060.43 | 43969.41 | 4.51 | 99.99  | 101.11 | 1184.8 | 17.72 |
| 2010/7/22 | 79.3  | 79.01 | 75060.43 | 43969.41 | 4.64 | 99.41  | 101.46 | 1195   | 18.15 |
| 2010/7/23 | 78.98 | 78.68 | 75060.43 | 43969.41 | 4.58 | 98.37  | 101.29 | 1188.9 | 18.12 |
| 2010/7/26 | 78.98 | 78.93 | 75060.43 | 43969.41 | 4.61 | 97.96  | 100.29 | 1183.4 | 18.17 |
| 2010/7/27 | 77.5  | 77.46 | 75060.43 | 43969.41 | 4.68 | 97.26  | 100.43 | 1162.9 | 17.67 |
| 2010/7/28 | 76.99 | 77.06 | 75060.43 | 43969.41 | 4.77 | 97.29  | 99.97  | 1165.7 | 17.5  |
| 2010/7/29 | 78.36 | 78.3  | 75060.43 | 43969.41 | 4.83 | 97.14  | 99.63  | 1168.5 | 17.6  |
| 2010/7/30 | 78.95 | 78.85 | 75060.43 | 43969.41 | 4.92 | 96.67  | 99.76  | 1181.1 | 18    |
| 2010/8/2  | 81.34 | 81.25 | 74920.13 | 45054.54 | 4.7  | 95.86  | 98.81  | 1183.3 | 18.37 |
| 2010/8/3  | 82.55 | 82.52 | 74920.13 | 45054.54 | 4.64 | 95.51  | 98.62  | 1193.5 | 18.57 |

|            |       |       |          |          |      |       |       |        |       |
|------------|-------|-------|----------|----------|------|-------|-------|--------|-------|
| 2010/8/4   | 82.47 | 82.49 | 74920.13 | 45054.54 | 4.74 | 95.88 | 99.14 | 1194.3 | 18.31 |
| 2010/8/5   | 82.01 | 82    | 74920.13 | 45054.54 | 4.6  | 95.86 | 99.52 | 1195.4 | 18.36 |
| 2010/8/6   | 80.7  | 80.67 | 74920.13 | 45054.54 | 4.47 | 95.54 | 99.18 | 1205.5 | 18.46 |
| 2010/8/9   | 81.48 | 81.46 | 74920.13 | 45054.54 | 4.31 | 95.79 | 98.96 | 1201.2 | 18.34 |
| 2010/8/10  | 80.25 | 80.24 | 74920.13 | 45054.54 | 4.3  | 96.11 | 99.14 | 1203.6 | 18.31 |
| 2010/8/11  | 78.02 | 78.09 | 74920.13 | 45054.54 | 4.33 | 97.34 | 98.7  | 1199   | 17.9  |
| 2010/8/12  | 75.74 | 75.68 | 74920.13 | 45054.54 | 4.3  | 97.78 | 98.5  | 1214.8 | 18.14 |
| 2010/8/13  | 75.39 | 75.39 | 74920.13 | 45054.54 | 4.33 | 97.68 | 98.76 | 1214   | 18.14 |
| 2010/8/16  | 75.24 | 75.17 | 74920.13 | 45054.54 | 4.23 | 97.3  | 98.67 | 1224.3 | 18.39 |
| 2010/8/17  | 75.77 | 75.76 | 74920.13 | 45054.54 | 4.27 | 97.78 | 98.66 | 1226.9 | 18.51 |
| 2010/8/18  | 75.42 | 75.39 | 74920.13 | 45054.54 | 4.24 | 97.66 | 99.56 | 1229.9 | 18.46 |
| 2010/8/19  | 74.43 | 74.45 | 74920.13 | 45054.54 | 4.17 | 97.69 | 99.48 | 1232.5 | 18.27 |
| 2010/8/20  | 73.46 | 73.45 | 74920.13 | 45054.54 | 4.12 | 98.04 | 99.1  | 1227.7 | 18    |
| 2010/8/23  | 73.1  | 72.71 | 74920.13 | 45054.54 | 4.07 | 98.3  | 98.7  | 1221.5 | 17.89 |
| 2010/8/24  | 71.63 | 71.24 | 74920.13 | 45054.54 | 4.04 | 98.87 | 99.49 | 1230.7 | 18.4  |
| 2010/8/25  | 72.52 | 72.07 | 74920.13 | 45054.54 | 3.87 | 98.43 | 98.93 | 1239.3 | 19    |
| 2010/8/26  | 73.36 | 73.36 | 74920.13 | 45054.54 | 3.82 | 98.11 | 98.07 | 1236.9 | 18.91 |
| 2010/8/27  | 75.17 | 75.17 | 74920.13 | 45054.54 | 3.65 | 98.09 | 98.93 | 1234.8 | 19.11 |
| 2010/8/30  | 74.7  | 74.69 | 74920.13 | 45054.54 | 3.81 | 98.5  | 98.77 | 1237.6 | 19.06 |
| 2010/8/31  | 71.92 | 71.93 | 74920.13 | 45054.54 | 3.82 | 99.22 | 98.1  | 1247.3 | 19.34 |
| 2010/9/1   | 73.91 | 73.97 | 75254.19 | 46119.02 | 3.76 | 98.52 | 98.47 | 1246.9 | 19.33 |
| 2010/9/2   | 75.02 | 74.99 | 75254.19 | 46119.02 | 3.75 | 98.89 | 98.76 | 1250.2 | 19.61 |
| 2010/9/3   | 74.6  | 74.52 | 75254.19 | 46119.02 | 3.94 | 98.52 | 98.61 | 1247.1 | 19.87 |
| 2010/9/7   | 74.09 | 73.98 | 75254.19 | 46119.02 | 3.85 | 99.14 | 98.54 | 1257.1 | 19.88 |
| 2010/9/8   | 74.67 | 74.65 | 75254.19 | 46119.02 | 3.81 | 98.37 | 97.7  | 1255.6 | 19.82 |
| 2010/9/9   | 74.25 | 74.25 | 75254.19 | 46119.02 | 3.77 | 98.65 | 98.02 | 1246.4 | 19.71 |
| 2010/9/10  | 76.45 | 76.4  | 75254.19 | 46119.02 | 3.88 | 99.17 | 98.01 | 1246.3 | 19.86 |
| 2010/9/13  | 77.19 | 77.17 | 75254.19 | 46119.02 | 3.94 | 98.69 | 98.37 | 1250.1 | 20.15 |
| 2010/9/14  | 76.8  | 76.78 | 75254.19 | 46119.02 | 3.97 | 98.02 | 98.73 | 1266.9 | 20.38 |
| 2010/9/15  | 76.02 | 75.92 | 75254.19 | 46119.02 | 4    | 97.39 | 97.9  | 1267.3 | 20.52 |
| 2010/9/16  | 74.57 | 74.58 | 75254.19 | 46119.02 | 4.06 | 97.41 | 96.34 | 1275.8 | 20.78 |
| 2010/9/17  | 73.66 | 73.63 | 75254.19 | 46119.02 | 4.02 | 97.39 | 95.6  | 1274.2 | 20.73 |
| 2010/9/20  | 74.86 | 74.81 | 75254.19 | 46119.02 | 3.82 | 97.95 | 96.31 | 1279.3 | 20.74 |
| 2010/9/21  | 73.52 | 72.96 | 75254.19 | 46119.02 | 3.92 | 97.55 | 96.62 | 1288.6 | 20.83 |
| 2010/9/22  | 74.71 | 72.98 | 75254.19 | 46119.02 | 3.97 | 97.28 | 95.99 | 1292.2 | 21.21 |
| 2010/9/23  | 75.18 | 73.4  | 75254.19 | 46119.02 | 4.02 | 97.07 | 96.23 | 1292.8 | 21.12 |
| 2010/9/24  | 76.49 | 74.63 | 75254.19 | 46119.02 | 3.88 | 96.21 | 96.22 | 1296   | 21.44 |
| 2010/9/27  | 76.52 | 76.51 | 75254.19 | 46119.02 | 3.8  | 96.3  | 96.26 | 1292.6 | 21.35 |
| 2010/9/28  | 76.18 | 76.15 | 75254.19 | 46119.02 | 3.84 | 96.31 | 96.54 | 1309.6 | 21.65 |
| 2010/9/29  | 77.86 | 77.85 | 75254.19 | 46119.02 | 3.96 | 96.38 | 96.84 | 1307   | 22.21 |
| 2010/9/30  | 79.97 | 79.95 | 75254.19 | 46119.02 | 3.87 | 96.89 | 96.24 | 1307.8 | 22.24 |
| 2010/10/1  | 81.58 | 81.57 | 75097.05 | 43022.7  | 3.8  | 96.33 | 96.75 | 1318.2 | 22.11 |
| 2010/10/4  | 81.47 | 81.43 | 75097.05 | 43022.7  | 3.73 | 96.3  | 96.79 | 1312.9 | 22.33 |
| 2010/10/5  | 82.82 | 82.83 | 75097.05 | 43022.7  | 3.74 | 95.88 | 96.81 | 1342.7 | 23.18 |
| 2010/10/6  | 83.23 | 83.21 | 75097.05 | 43022.7  | 3.87 | 95.94 | 97.8  | 1346   | 23.34 |
| 2010/10/7  | 81.67 | 81.34 | 75097.05 | 43022.7  | 3.62 | 96    | 98.88 | 1333.8 | 22.96 |
| 2010/10/8  | 82.66 | 82.66 | 75097.05 | 43022.7  | 3.65 | 95.45 | 98.18 | 1346.5 | 22.93 |
| 2010/10/11 | 81.33 | 82.18 | 75097.05 | 43022.7  | 3.6  | 95.91 | 97.77 | 1353.6 | 23.7  |
| 2010/10/12 | 81.67 | 81.67 | 75097.05 | 43022.7  | 3.63 | 96.41 | 97.48 | 1356.4 | 23.48 |
| 2010/10/13 | 83.36 | 83.03 | 75097.05 | 43022.7  | 3.7  | 95.88 | 97.37 | 1373.5 | 24.3  |
| 2010/10/14 | 82.69 | 82.71 | 75097.05 | 43022.7  | 3.66 | 95.18 | 96.94 | 1379.2 | 24.86 |
| 2010/10/15 | 81.25 | 81.23 | 75097.05 | 43022.7  | 3.54 | 95.28 | 96.35 | 1364.7 | 24.38 |
| 2010/10/18 | 83.08 | 83.06 | 75097.05 | 43022.7  | 3.43 | 95.88 | 96.06 | 1370.5 | 24.81 |
| 2010/10/19 | 79.49 | 79.57 | 75097.05 | 43022.7  | 3.51 | 97.01 | 96.68 | 1336   | 23.64 |



|            |       |       |          |          |      |        |       |        |       |
|------------|-------|-------|----------|----------|------|--------|-------|--------|-------|
| 2010/10/20 | 81.77 | 81.93 | 75097.05 | 43022.7  | 3.54 | 96.2   | 96.13 | 1345.8 | 24.24 |
| 2010/10/21 | 80.56 | 80.03 | 75097.05 | 43022.7  | 3.37 | 96.98  | 96.11 | 1325.6 | 23.48 |
| 2010/10/22 | 81.69 | 81.15 | 75097.05 | 43022.7  | 3.33 | 97.15  | 97.16 | 1328.1 | 23.62 |
| 2010/10/25 | 82.52 | 82    | 75097.05 | 43022.7  | 3.32 | 96.88  | 97.87 | 1338.7 | 23.97 |
| 2010/10/26 | 82.55 | 82.6  | 75097.05 | 43022.7  | 3.35 | 96.16  | 96.97 | 1341   | 24.24 |
| 2010/10/27 | 81.94 | 81.9  | 75097.05 | 43022.7  | 3.29 | 96.56  | 96.58 | 1322.7 | 24.02 |
| 2010/10/28 | 82.18 | 82.2  | 75097.05 | 43022.7  | 3.89 | 95.6   | 96.21 | 1340.7 | 24.2  |
| 2010/10/29 | 81.43 | 81.45 | 75097.05 | 43022.7  | 4.04 | 95.01  | 95.01 | 1359.8 | 24.74 |
| 2010/11/1  | 82.95 | 82.94 | 75568.15 | 45021.36 | 3.83 | 95.27  | 93.84 | 1356   | 24.77 |
| 2010/11/2  | 83.9  | 83.91 | 75568.15 | 45021.36 | 3.87 | 95.29  | 93.58 | 1354.5 | 25.25 |
| 2010/11/3  | 84.69 | 84.45 | 75568.15 | 45021.36 | 3.84 | 94.92  | 93.79 | 1355.8 | 25.52 |
| 2010/11/4  | 86.49 | 86.49 | 75568.15 | 45021.36 | 3.86 | 93.92  | 93.79 | 1389.8 | 26.33 |
| 2010/11/5  | 86.85 | 86.85 | 75568.15 | 45021.36 | 3.94 | 94.44  | 93.79 | 1393.9 | 27.17 |
| 2010/11/8  | 87.06 | 87.07 | 75568.15 | 45021.36 | 4.09 | 94.68  | 93.07 | 1411   | 27.87 |
| 2010/11/9  | 86.72 | 87.04 | 75568.15 | 45021.36 | 4.21 | 95.6   | 93.24 | 1396.5 | 27.26 |
| 2010/11/10 | 87.81 | 87.77 | 75568.15 | 45021.36 | 4.05 | 94.8   | 94.29 | 1408   | 27.84 |
| 2010/11/11 | 87.81 | 87.77 | 75568.15 | 45021.36 | 3.93 | 94.8   | 94.08 | 1389   | 26.85 |
| 2010/11/12 | 84.88 | 84.89 | 75568.15 | 45021.36 | 3.8  | 94.81  | 93.77 | 1368.2 | 26.39 |
| 2010/11/15 | 84.86 | 84.88 | 75568.15 | 45021.36 | 3.85 | 95.22  | 93.46 | 1359   | 26.4  |
| 2010/11/16 | 82.34 | 82.33 | 75568.15 | 45021.36 | 3.82 | 96.2   | 93.04 | 1336.2 | 25.91 |
| 2010/11/17 | 80.44 | 80.43 | 75568.15 | 45021.36 | 4.03 | 96.08  | 92.95 | 1349.1 | 26    |
| 2010/11/18 | 81.85 | 81.88 | 75568.15 | 45021.36 | 4.01 | 95.27  | 93.35 | 1352.9 | 27.2  |
| 2010/11/19 | 81.51 | 81.65 | 75568.15 | 45021.36 | 4.16 | 95.65  | 93.19 | 1353.6 | 27.2  |
| 2010/11/22 | 81.74 | 81.24 | 75568.15 | 45021.36 | 4.27 | 95.77  | 93.1  | 1361.2 | 27.2  |
| 2010/11/23 | 81.25 | 80.79 | 75568.15 | 45021.36 | 4.26 | 96.87  | 92.93 | 1361.2 | 27.2  |
| 2010/11/24 | 83.86 | 83.21 | 75568.15 | 45021.36 | 4.27 | 96.91  | 93.72 | 1361.2 | 27.2  |
| 2010/11/26 | 83.76 | 83.87 | 75568.15 | 45021.36 | 4.4  | 98.03  | 93.92 | 1363.2 | 26.7  |
| 2010/11/29 | 85.73 | 85.73 | 75568.15 | 45021.36 | 4.21 | 98.13  | 94.75 | 1364.5 | 27.07 |
| 2010/11/30 | 84.11 | 84.12 | 75568.15 | 45021.36 | 4.18 | 98.19  | 94.89 | 1388.7 | 28.12 |
| 2010/12/1  | 86.75 | 86.75 | 75508.85 | 45953.82 | 4.27 | 98.64  | 94.38 | 1393.5 | 28.52 |
| 2010/12/2  | 88    | 87.98 | 75508.85 | 45953.82 | 4.34 | 98.78  | 94.64 | 1390.9 | 28.79 |
| 2010/12/3  | 89.19 | 89.18 | 75508.85 | 45953.82 | 4.35 | 97.69  | 94.79 | 1413.8 | 29.42 |
| 2010/12/6  | 89.38 | 89.33 | 75508.85 | 45953.82 | 4.49 | 98.03  | 94.06 | 1423   | 30.24 |
| 2010/12/7  | 88.69 | 88.69 | 75508.85 | 45953.82 | 4.39 | 97.78  | 93.94 | 1390   | 28.69 |
| 2010/12/8  | 88.28 | 88.3  | 75508.85 | 45953.82 | 4.61 | 97.5   | 94.24 | 1387.4 | 28.65 |
| 2010/12/9  | 88.37 | 88.35 | 75508.85 | 45953.82 | 4.44 | 97.72  | 94.44 | 1390   | 28.79 |
| 2010/12/10 | 87.79 | 87.81 | 75508.85 | 45953.82 | 4.42 | 97.5   | 94.89 | 1387.2 | 28.71 |
| 2010/12/13 | 88.61 | 88.62 | 75508.85 | 45953.82 | 4.42 | 97.14  | 94.95 | 1403.3 | 29.59 |
| 2010/12/14 | 88.28 | 88.33 | 75508.85 | 45953.82 | 4.26 | 97.66  | 94.74 | 1394   | 29.55 |
| 2010/12/15 | 88.62 | 88.66 | 75508.85 | 45953.82 | 4.22 | 99.13  | 95.71 | 1380.9 | 28.84 |
| 2010/12/16 | 87.7  | 87.71 | 75508.85 | 45953.82 | 4.05 | 98.57  | 96.54 | 1376.1 | 28.9  |
| 2010/12/17 | 88.02 | 88.02 | 75508.85 | 45953.82 | 4.07 | 99.18  | 96.54 | 1377.2 | 29.22 |
| 2010/12/20 | 88.81 | 88.68 | 75508.85 | 45953.82 | 4.24 | 99.33  | 96.74 | 1385.2 | 29.28 |
| 2010/12/21 | 89.82 | 89.3  | 75508.85 | 45953.82 | 4.06 | 99.6   | 96.87 | 1388   | 29.35 |
| 2010/12/22 | 90.48 | 89.83 | 75508.85 | 45953.82 | 4.15 | 100.14 | 97.31 | 1388.4 | 29.25 |
| 2010/12/23 | 91.51 | 90.84 | 75508.85 | 45953.82 | 4.08 | 99.88  | 98.34 | 1379.3 | 29.27 |
| 2010/12/27 | 91    | 90.99 | 75508.85 | 45953.82 | 4.11 | 99.91  | 98.45 | 1389.8 | 29.21 |
| 2010/12/28 | 91.49 | 91.48 | 75508.85 | 45953.82 | 4.22 | 100.26 | 98.98 | 1403.1 | 30.29 |
| 2010/12/29 | 91.12 | 91.13 | 75508.85 | 45953.82 | 4.29 | 99.41  | 99.17 | 1412.2 | 30.62 |
| 2010/12/30 | 89.84 | 89.85 | 75508.85 | 45953.82 | 4.34 | 99.89  | 97.92 | 1407.2 | 30.54 |
| 2010/12/31 | 91.38 | 91.38 | 75508.85 | 45953.82 | 4.41 | 98.73  | 96.29 | 1422   | 30.9  |
| 2011/1/3   | 91.55 | 91.59 | 76151.31 | 44704.51 | 4.65 | 99.13  | 96.29 | 1417   | 30.68 |
| 2011/1/4   | 89.38 | 89.39 | 76151.31 | 44704.51 | 4.67 | 98.49  | 96.29 | 1383.9 | 29.66 |
| 2011/1/5   | 90.3  | 90.3  | 76151.31 | 44704.51 | 4.47 | 98.95  | 96.29 | 1375.3 | 29.35 |

|           |        |        |          |          |      |       |       |        |       |
|-----------|--------|--------|----------|----------|------|-------|-------|--------|-------|
| 2011/1/6  | 88.38  | 88.37  | 76151.31 | 44704.51 | 4.43 | 99.24 | 96.29 | 1370.3 | 28.97 |
| 2011/1/7  | 88.03  | 88.07  | 76151.31 | 44704.51 | 4.42 | 98.75 | 96.29 | 1369.7 | 28.83 |
| 2011/1/10 | 89.25  | 89.24  | 76151.31 | 44704.51 | 4.4  | 98.59 | 96.29 | 1375   | 29.01 |
| 2011/1/11 | 91.11  | 91.11  | 76151.31 | 44704.51 | 4.48 | 98.42 | 95.02 | 1385   | 29.56 |
| 2011/1/12 | 91.86  | 91.85  | 76151.31 | 44704.51 | 4.53 | 97.36 | 95.09 | 1386.1 | 29.66 |
| 2011/1/13 | 91.4   | 91.39  | 76151.31 | 44704.51 | 4.41 | 96.94 | 95.56 | 1375.9 | 28.7  |
| 2011/1/14 | 91.54  | 91.53  | 76151.31 | 44704.51 | 4.48 | 96.75 | 95.38 | 1361.4 | 28.48 |
| 2011/1/18 | 91.38  | 91.38  | 76151.31 | 44704.51 | 4.43 | 96.19 | 94.81 | 1372.5 | 28.86 |
| 2011/1/19 | 90.86  | 90.85  | 76151.31 | 44704.51 | 4.56 | 95.97 | 94.76 | 1368.1 | 28.61 |
| 2011/1/20 | 88.86  | 88.56  | 76151.31 | 44704.51 | 4.7  | 96.57 | 94.75 | 1347.9 | 27.51 |
| 2011/1/21 | 89.11  | 88.22  | 76151.31 | 44704.51 | 4.74 | 95.95 | 94.62 | 1341.9 | 27.33 |
| 2011/1/24 | 87.87  | 86.74  | 76151.31 | 44704.51 | 4.58 | 96.02 | 95.04 | 1332.2 | 26.66 |
| 2011/1/25 | 86.19  | 85.08  | 76151.31 | 44704.51 | 4.47 | 97.05 | 95.36 | 1332.3 | 26.83 |
| 2011/1/26 | 87.33  | 86.15  | 76151.31 | 44704.51 | 4.49 | 96.36 | 96.16 | 1344.2 | 27.65 |
| 2011/1/27 | 85.64  | 84.45  | 76151.31 | 44704.51 | 4.32 | 96.39 | 95.87 | 1313.2 | 27.41 |
| 2011/1/28 | 89.34  | 88.15  | 76151.31 | 44704.51 | 4.32 | 96.8  | 96.13 | 1338   | 27.96 |
| 2011/1/31 | 92.19  | 90.99  | 76151.31 | 44704.51 | 4.42 | 95.86 | 95.73 | 1335.7 | 28.14 |
| 2011/2/1  | 90.77  | 89.54  | 75302.18 | 45445.03 | 4.35 | 95.35 | 95.05 | 1340.4 | 28.56 |
| 2011/2/2  | 90.86  | 89.78  | 75302.18 | 45445.03 | 4.43 | 95.08 | 95.01 | 1335.6 | 28.37 |
| 2011/2/3  | 90.54  | 89.42  | 75302.18 | 45445.03 | 4.34 | 95.39 | 95.08 | 1351.7 | 28.81 |
| 2011/2/4  | 89.03  | 87.87  | 75302.18 | 45445.03 | 4.31 | 95.54 | 95.14 | 1348.8 | 29.11 |
| 2011/2/7  | 87.48  | 86.3   | 75302.18 | 45445.03 | 4.1  | 95.55 | 95.28 | 1351.1 | 29.43 |
| 2011/2/8  | 86.94  | 85.85  | 75302.18 | 45445.03 | 4.04 | 95.8  | 95.83 | 1362.3 | 30.1  |
| 2011/2/9  | 86.71  | 85.59  | 75302.18 | 45445.03 | 4.04 | 95.58 | 95.98 | 1362.5 | 30.14 |
| 2011/2/10 | 86.73  | 85.44  | 75302.18 | 45445.03 | 3.99 | 95.62 | 95.99 | 1364.8 | 30.08 |
| 2011/2/11 | 85.58  | 84.39  | 75302.18 | 45445.03 | 3.91 | 96.16 | 96.06 | 1356.5 | 29.86 |
| 2011/2/14 | 84.81  | 83.66  | 75302.18 | 45445.03 | 3.93 | 95.98 | 96.43 | 1361.6 | 30.63 |
| 2011/2/15 | 84.32  | 83.13  | 75302.18 | 45445.03 | 3.98 | 95.46 | 96.22 | 1373.3 | 30.71 |
| 2011/2/16 | 84.99  | 83.8   | 75302.18 | 45445.03 | 3.92 | 95.63 | 95.68 | 1375.3 | 30.67 |
| 2011/2/17 | 86.36  | 85.05  | 75302.18 | 45445.03 | 3.87 | 95.19 | 96.1  | 1383.6 | 31.65 |
| 2011/2/18 | 86.2   | 85.03  | 75302.18 | 45445.03 | 3.88 | 94.73 | 95.46 | 1388   | 32.62 |
| 2011/2/22 | 93.57  | 92.65  | 75302.18 | 45445.03 | 3.87 | 95.39 | 95.71 | 1397.8 | 33.07 |
| 2011/2/23 | 98.1   | 96.04  | 75302.18 | 45445.03 | 3.9  | 94.95 | 95.71 | 1414.4 | 33.55 |
| 2011/2/24 | 97.28  | 95.83  | 75302.18 | 45445.03 | 3.79 | 95.39 | 95.95 | 1412.5 | 32.51 |
| 2011/2/25 | 97.88  | 96.52  | 75302.18 | 45445.03 | 4.01 | 95.51 | 96.85 | 1408.7 | 33.32 |
| 2011/2/28 | 96.97  | 97.1   | 75302.18 | 45445.03 | 4.04 | 94.69 | 96.74 | 1410.7 | 33.88 |
| 2011/3/1  | 99.63  | 99.63  | 74264.34 | 44915.29 | 3.87 | 93.94 | 96.06 | 1430.7 | 34.55 |
| 2011/3/2  | 102.23 | 102.27 | 74264.34 | 44915.29 | 3.82 | 93.58 | 97.01 | 1437.2 | 34.61 |
| 2011/3/3  | 101.91 | 101.92 | 74264.34 | 44915.29 | 3.78 | 93.86 | 97.52 | 1417   | 34.42 |
| 2011/3/4  | 104.42 | 104.34 | 74264.34 | 44915.29 | 3.81 | 93.9  | 98.36 | 1429.7 | 35.62 |
| 2011/3/7  | 105.44 | 105.37 | 74264.34 | 44915.29 | 3.93 | 94.3  | 98.36 | 1432.3 | 35.88 |
| 2011/3/8  | 105.02 | 105.06 | 74264.34 | 44915.29 | 3.86 | 94.53 | 98.36 | 1426.9 | 36.13 |
| 2011/3/9  | 104.38 | 104.39 | 74264.34 | 44915.29 | 3.93 | 94.3  | 98.56 | 1428.7 | 35.95 |
| 2011/3/10 | 102.7  | 102.73 | 74264.34 | 44915.29 | 3.83 | 95.15 | 98.25 | 1414.1 | 35.16 |
| 2011/3/11 | 101.16 | 101.14 | 74264.34 | 44915.29 | 3.89 | 95    | 98.08 | 1422.5 | 35.92 |
| 2011/3/14 | 101.19 | 101.2  | 74264.34 | 44915.29 | 3.91 | 94.48 | 98.01 | 1423.5 | 35.7  |
| 2011/3/15 | 97.18  | 97.23  | 74264.34 | 44915.29 | 3.94 | 95.02 | 97.64 | 1396   | 34.4  |
| 2011/3/16 | 97.98  | 97.99  | 74264.34 | 44915.29 | 3.94 | 95.54 | 97.61 | 1387.7 | 33.7  |
| 2011/3/17 | 101.42 | 101.47 | 74264.34 | 44915.29 | 4.16 | 94.64 | 97.59 | 1406.4 | 34.25 |
| 2011/3/18 | 101.07 | 101.06 | 74264.34 | 44915.29 | 4.17 | 94.12 | 98.05 | 1419.3 | 35.11 |
| 2011/3/21 | 102.33 | 102.36 | 74264.34 | 44915.29 | 4.16 | 93.71 | 97.8  | 1430.4 | 36.2  |
| 2011/3/22 | 104    | 104.53 | 74264.34 | 44915.29 | 4.25 | 93.32 | 97.94 | 1424.5 | 36.41 |
| 2011/3/23 | 105.75 | 105.21 | 74264.34 | 44915.29 | 4.34 | 94.05 | 97.38 | 1437.7 | 37.23 |
| 2011/3/24 | 105.6  | 105.04 | 74264.34 | 44915.29 | 4.24 | 94.78 | 97.86 | 1439.5 | 37.43 |

|           |        |        |          |          |      |       |        |        |       |
|-----------|--------|--------|----------|----------|------|-------|--------|--------|-------|
| 2011/3/25 | 105.4  | 104.89 | 74264.34 | 44915.29 | 4.4  | 95.23 | 99.11  | 1436   | 37.22 |
| 2011/3/28 | 103.98 | 103.54 | 74264.34 | 44915.29 | 4.37 | 95.54 | 99.24  | 1415.6 | 37.11 |
| 2011/3/29 | 104.79 | 104.34 | 74264.34 | 44915.29 | 4.24 | 95.46 | 99.27  | 1416   | 36.96 |
| 2011/3/30 | 104.27 | 103.8  | 74264.34 | 44915.29 | 4.36 | 95.03 | 98.83  | 1424.4 | 37.57 |
| 2011/3/31 | 106.72 | 106.19 | 74264.34 | 44915.29 | 4.39 | 95.24 | 98.51  | 1430.7 | 37.5  |
| 2011/4/1  | 107.94 | 107.55 | 74084.65 | 43242.89 | 4.36 | 95.25 | 99.51  | 1428.7 | 37.84 |
| 2011/4/4  | 108.47 | 108.14 | 74084.65 | 43242.89 | 4.29 | 95.13 | 99.51  | 1437.7 | 38.73 |
| 2011/4/5  | 108.34 | 107.82 | 74084.65 | 43242.89 | 4.23 | 94.15 | 99.19  | 1453.5 | 39.31 |
| 2011/4/6  | 108.83 | 108.38 | 74084.65 | 43242.89 | 4.15 | 93.97 | 98.36  | 1456.9 | 39.4  |
| 2011/4/7  | 110.3  | 109.82 | 74084.65 | 43242.89 | 4.06 | 94.03 | 98.48  | 1464.8 | 39.85 |
| 2011/4/8  | 112.79 | 112.27 | 74084.65 | 43242.89 | 4.04 | 93.67 | 98.25  | 1474.9 | 40.9  |
| 2011/4/11 | 109.92 | 109.5  | 74084.65 | 43242.89 | 4.11 | 93.88 | 99.28  | 1459   | 40.26 |
| 2011/4/12 | 106.25 | 105.75 | 74084.65 | 43242.89 | 4.1  | 94.38 | 98.91  | 1454.4 | 40.21 |
| 2011/4/13 | 107.11 | 106.6  | 74084.65 | 43242.89 | 4.14 | 94.33 | 99.07  | 1459   | 40.28 |
| 2011/4/14 | 108.11 | 107.73 | 74084.65 | 43242.89 | 4.21 | 93.85 | 98.4   | 1477   | 41.85 |
| 2011/4/15 | 109.66 | 109.17 | 74084.65 | 43242.89 | 4.2  | 94.03 | 98.25  | 1486.8 | 42.65 |
| 2011/4/18 | 107.12 | 106.7  | 74084.65 | 43242.89 | 4.14 | 94.31 | 98.99  | 1491.9 | 42.75 |
| 2011/4/19 | 108.15 | 107.18 | 74084.65 | 43242.89 | 4.26 | 94.03 | 98.17  | 1494.4 | 43.24 |
| 2011/4/20 | 111.45 | 110.84 | 74084.65 | 43242.89 | 4.31 | 93.56 | 98.42  | 1508   | 45.9  |
| 2011/4/21 | 112.29 | 111.72 | 74084.65 | 43242.89 | 4.41 | 92.93 | 98.48  | 1504.8 | 46.22 |
| 2011/4/25 | 112.28 | 111.68 | 74084.65 | 43242.89 | 4.39 | 93.03 | 98.08  | 1498   | 45.61 |
| 2011/4/26 | 112.21 | 111.72 | 74084.65 | 43242.89 | 4.39 | 93.08 | 98.62  | 1507.1 | 44.76 |
| 2011/4/27 | 112.76 | 112.31 | 74084.65 | 43242.89 | 4.38 | 92.3  | 99.43  | 1509.5 | 45.78 |
| 2011/4/28 | 112.86 | 112.38 | 74084.65 | 43242.89 | 4.57 | 92.22 | 98.85  | 1536.3 | 48.42 |
| 2011/4/29 | 113.93 | 113.39 | 74084.65 | 43242.89 | 4.7  | 91.83 | 98.99  | 1563   | 47.84 |
| 2011/5/2  | 113.52 | 113.03 | 73446.03 | 42696.02 | 4.69 | 91.92 | 98.99  | 1541.5 | 45.06 |
| 2011/5/3  | 111.05 | 110.6  | 73446.03 | 42696.02 | 4.67 | 92.85 | 99.68  | 1530.9 | 41.1  |
| 2011/5/4  | 109.24 | 108.79 | 73446.03 | 42696.02 | 4.58 | 92.8  | 100.09 | 1517.2 | 39    |
| 2011/5/5  | 99.8   | 99.89  | 73446.03 | 42696.02 | 4.26 | 93.41 | 100.35 | 1487   | 35.45 |
| 2011/5/6  | 97.18  | 96.87  | 73446.03 | 42696.02 | 4.24 | 93.5  | 99.81  | 1492.3 | 35.07 |
| 2011/5/9  | 102.55 | 100.32 | 73446.03 | 42696.02 | 4.15 | 93.36 | 99.81  | 1512.8 | 37.63 |
| 2011/5/10 | 103.88 | 103.39 | 73446.03 | 42696.02 | 4.25 | 93.5  | 99.28  | 1517   | 38.77 |
| 2011/5/11 | 98.21  | 97.88  | 73446.03 | 42696.02 | 4.18 | 93.57 | 100.08 | 1504.2 | 35.14 |
| 2011/5/12 | 98.97  | 98.53  | 73446.03 | 42696.02 | 4.19 | 93.96 | 99.09  | 1494.2 | 34.5  |
| 2011/5/13 | 99.65  | 99.21  | 73446.03 | 42696.02 | 4.25 | 94.48 | 99.77  | 1490.2 | 34.93 |
| 2011/5/16 | 97.37  | 96.91  | 73446.03 | 42696.02 | 4.32 | 94.48 | 99.29  | 1489.8 | 33.6  |
| 2011/5/17 | 96.91  | 96.4   | 73446.03 | 42696.02 | 4.18 | 94.21 | 99.07  | 1491.5 | 33.68 |
| 2011/5/18 | 100.1  | 99.52  | 73446.03 | 42696.02 | 4.2  | 94.66 | 99.25  | 1497   | 35.61 |
| 2011/5/19 | 98.44  | 97.99  | 73446.03 | 42696.02 | 4.09 | 94.32 | 100.22 | 1491.5 | 35.19 |
| 2011/5/20 | 99.49  | 99.15  | 73446.03 | 42696.02 | 4.23 | 94.28 | 99.91  | 1511.5 | 34.94 |
| 2011/5/23 | 97.7   | 97.06  | 73446.03 | 42696.02 | 4.35 | 94.95 | 98.84  | 1512.3 | 35    |
| 2011/5/24 | 99.59  | 99.13  | 73446.03 | 42696.02 | 4.35 | 94.6  | 98.67  | 1524.5 | 36.66 |
| 2011/5/25 | 101.32 | 100.78 | 73446.03 | 42696.02 | 4.38 | 94.06 | 98.4   | 1527.2 | 38.21 |
| 2011/5/26 | 100.23 | 100.18 | 73446.03 | 42696.02 | 4.33 | 93.41 | 98.33  | 1519.5 | 37.43 |
| 2011/5/27 | 100.59 | 100.58 | 73446.03 | 42696.02 | 4.52 | 92.72 | 97.79  | 1536.5 | 37.8  |
| 2011/5/31 | 102.7  | 102.7  | 73446.03 | 42696.02 | 4.67 | 93.03 | 97.49  | 1531.3 | 38.22 |
| 2011/6/1  | 100.29 | 100.3  | 74241.37 | 43760.53 | 4.63 | 93.78 | 97.83  | 1539.4 | 37.07 |
| 2011/6/2  | 100.4  | 100.41 | 74241.37 | 43760.53 | 4.79 | 93.51 | 98.54  | 1532.3 | 36.11 |
| 2011/6/3  | 100.22 | 100.28 | 74241.37 | 43760.53 | 4.71 | 93.17 | 98.97  | 1543.3 | 36.21 |
| 2011/6/6  | 99.01  | 99.07  | 74241.37 | 43760.53 | 4.83 | 93.57 | 98.8   | 1542.9 | 36.58 |
| 2011/6/7  | 99.09  | 99.18  | 74241.37 | 43760.53 | 4.83 | 93.11 | 98.97  | 1540.7 | 36.98 |
| 2011/6/8  | 100.74 | 100.77 | 74241.37 | 43760.53 | 4.85 | 93.36 | 99.49  | 1535   | 36.78 |
| 2011/6/9  | 101.93 | 101.95 | 74241.37 | 43760.53 | 4.67 | 93.49 | 98.96  | 1543.6 | 37.83 |
| 2011/6/10 | 99.29  | 99.3   | 74241.37 | 43760.53 | 4.76 | 94.32 | 99.72  | 1532   | 36.44 |

|           |       |       |          |          |      |       |        |        |       |
|-----------|-------|-------|----------|----------|------|-------|--------|--------|-------|
| 2011/6/13 | 97.3  | 97.2  | 74241.37 | 43760.53 | 4.65 | 93.46 | 99.72  | 1519.2 | 34.77 |
| 2011/6/14 | 99.37 | 99.37 | 74241.37 | 43760.53 | 4.58 | 93.47 | 98.37  | 1526.3 | 35.65 |
| 2011/6/15 | 94.81 | 94.83 | 74241.37 | 43760.53 | 4.58 | 94.6  | 98.8   | 1526   | 35.46 |
| 2011/6/16 | 94.95 | 94.95 | 74241.37 | 43760.53 | 4.41 | 94.66 | 99.02  | 1527.9 | 35.37 |
| 2011/6/17 | 93.01 | 93.02 | 74241.37 | 43760.53 | 4.33 | 94.49 | 99.24  | 1540.2 | 35.67 |
| 2011/6/20 | 93.26 | 93.23 | 74241.37 | 43760.53 | 4.32 | 94.46 | 99.21  | 1540.1 | 36.04 |
| 2011/6/21 | 93.4  | 93.7  | 74241.37 | 43760.53 | 4.39 | 94.26 | 99.19  | 1547.2 | 36.55 |
| 2011/6/22 | 95.41 | 94.96 | 74241.37 | 43760.53 | 4.32 | 95.26 | 99.59  | 1551.9 | 36.5  |
| 2011/6/23 | 91.02 | 90.7  | 74241.37 | 43760.53 | 4.19 | 95.56 | 100.26 | 1525   | 35.34 |
| 2011/6/24 | 91.16 | 90.89 | 74241.37 | 43760.53 | 4.23 | 95.91 | 100.28 | 1502.6 | 35.15 |
| 2011/6/27 | 90.61 | 90.65 | 74241.37 | 43760.53 | 4.26 | 95.74 | 99.63  | 1497.9 | 33.58 |
| 2011/6/28 | 92.89 | 92.9  | 74241.37 | 43760.53 | 4.36 | 95.69 | 100    | 1502   | 34.04 |
| 2011/6/29 | 94.77 | 94.85 | 74241.37 | 43760.53 | 4.32 | 95.29 | 100.37 | 1511.5 | 34.95 |
| 2011/6/30 | 95.42 | 95.3  | 74241.37 | 43760.53 | 4.37 | 95.41 | 100.48 | 1502.2 | 34.55 |
| 2011/7/1  | 94.94 | 94.81 | 74679.87 | 43321.64 | 4.31 | 95.13 | 100.75 | 1483.9 | 33.73 |
| 2011/7/5  | 96.89 | 96.92 | 74679.87 | 43321.64 | 4.36 | 95.18 | 101.11 | 1513.4 | 35.37 |
| 2011/7/6  | 96.65 | 96.67 | 74679.87 | 43321.64 | 4.22 | 95.57 | 101.01 | 1526.4 | 35.98 |
| 2011/7/7  | 98.67 | 98.7  | 74679.87 | 43321.64 | 4.13 | 95.76 | 100.84 | 1525.9 | 36.35 |
| 2011/7/8  | 96.2  | 96.2  | 74679.87 | 43321.64 | 4.21 | 95.22 | 101.3  | 1526.6 | 36.75 |
| 2011/7/11 | 95.15 | 95.16 | 74679.87 | 43321.64 | 4.29 | 96.12 | 100.59 | 1555.2 | 35.81 |
| 2011/7/12 | 97.43 | 97.41 | 74679.87 | 43321.64 | 4.33 | 95.96 | 100.29 | 1565   | 36.28 |
| 2011/7/13 | 98.05 | 98.04 | 74679.87 | 43321.64 | 4.4  | 94.64 | 99.88  | 1581.1 | 38.34 |
| 2011/7/14 | 95.69 | 95.75 | 74679.87 | 43321.64 | 4.38 | 94.72 | 99.59  | 1590.1 | 38.41 |
| 2011/7/15 | 97.24 | 97.24 | 74679.87 | 43321.64 | 4.55 | 94.81 | 99.41  | 1592.2 | 39.3  |
| 2011/7/18 | 95.93 | 95.94 | 74679.87 | 43321.64 | 4.55 | 95.29 | 99.44  | 1597.3 | 40.33 |
| 2011/7/19 | 97.5  | 97.49 | 74679.87 | 43321.64 | 4.53 | 94.82 | 99.44  | 1583.3 | 39.01 |
| 2011/7/20 | 98.14 | 98.11 | 74679.87 | 43321.64 | 4.5  | 94.67 | 99.98  | 1596.7 | 39.89 |
| 2011/7/21 | 99.13 | 98.96 | 74679.87 | 43321.64 | 4.4  | 93.71 | 99.89  | 1586.8 | 39.93 |
| 2011/7/22 | 99.87 | 99.53 | 74679.87 | 43321.64 | 4.4  | 93.81 | 99.75  | 1601.3 | 40.14 |
| 2011/7/25 | 99.2  | 98.97 | 74679.87 | 43321.64 | 4.39 | 93.92 | 99.84  | 1612   | 40.27 |
| 2011/7/26 | 99.59 | 99.61 | 74679.87 | 43321.64 | 4.37 | 93.13 | 100.15 | 1614.8 | 40.75 |
| 2011/7/27 | 97.4  | 97.4  | 74679.87 | 43321.64 | 4.37 | 93.64 | 100.13 | 1616.5 | 40.51 |
| 2011/7/28 | 97.44 | 97.48 | 74679.87 | 43321.64 | 4.24 | 93.4  | 100.13 | 1617.3 | 39.76 |
| 2011/7/29 | 95.7  | 95.68 | 74679.87 | 43321.64 | 4.15 | 93.03 | 99.85  | 1631.1 | 40.14 |
| 2011/8/1  | 94.89 | 94.98 | 75106.68 | 44920.05 | 4.19 | 94.01 | 100.5  | 1620.4 | 39.31 |
| 2011/8/2  | 93.79 | 93.78 | 75106.68 | 44920.05 | 4.16 | 94.17 | 100.41 | 1654.1 | 40.59 |
| 2011/8/3  | 91.93 | 91.87 | 75106.68 | 44920.05 | 4.09 | 93.27 | 99.94  | 1661.6 | 41.68 |
| 2011/8/4  | 86.63 | 86.75 | 75106.68 | 44920.05 | 3.94 | 94.29 | 99.75  | 1653.4 | 39.36 |
| 2011/8/5  | 86.88 | 86.89 | 75106.68 | 44920.05 | 3.94 | 93.53 | 98.55  | 1654.5 | 39.07 |
| 2011/8/8  | 81.31 | 81.27 | 75106.68 | 44920.05 | 3.94 | 93.98 | 96.81  | 1695.9 | 39.21 |
| 2011/8/9  | 79.3  | 79.32 | 75106.68 | 44920.05 | 3.99 | 93.92 | 94.37  | 1747.4 | 37.63 |
| 2011/8/10 | 82.89 | 83.05 | 75106.68 | 44920.05 | 4    | 95.04 | 95.35  | 1776.1 | 38.49 |
| 2011/8/11 | 85.72 | 85.48 | 75106.68 | 44920.05 | 4.11 | 94.41 | 95.58  | 1748.8 | 38.66 |
| 2011/8/12 | 85.38 | 85.19 | 75106.68 | 44920.05 | 4.06 | 94.19 | 95.35  | 1740.2 | 39.1  |
| 2011/8/15 | 87.88 | 87.88 | 75106.68 | 44920.05 | 4.02 | 93.56 | 96.76  | 1755.5 | 39.3  |
| 2011/8/16 | 86.65 | 86.65 | 75106.68 | 44920.05 | 3.93 | 93.19 | 96.94  | 1782.4 | 39.82 |
| 2011/8/17 | 87.58 | 87.58 | 75106.68 | 44920.05 | 3.93 | 92.69 | 96.28  | 1791.2 | 40.35 |
| 2011/8/18 | 82.38 | 82.38 | 75106.68 | 44920.05 | 3.89 | 92.89 | 95.15  | 1818.9 | 40.69 |
| 2011/8/19 | 82.26 | 82.33 | 75106.68 | 44920.05 | 3.94 | 93.12 | 94.09  | 1848.9 | 42.43 |
| 2011/8/22 | 84.12 | 84.42 | 75106.68 | 44920.05 | 3.89 | 93.14 | 94.2   | 1848.9 | 42.43 |
| 2011/8/23 | 85.44 | 85.35 | 75106.68 | 44920.05 | 3.99 | 92.96 | 95.09  | 1858.3 | 42.28 |
| 2011/8/24 | 85.16 | 84.99 | 75106.68 | 44920.05 | 3.92 | 93.71 | 95.35  | 1754.1 | 39.16 |
| 2011/8/25 | 85.3  | 85.15 | 75106.68 | 44920.05 | 3.93 | 94.18 | 96.03  | 1759.8 | 40.74 |
| 2011/8/26 | 85.37 | 85.37 | 75106.68 | 44920.05 | 3.93 | 93.66 | 96.59  | 1794.1 | 40.95 |

|            |       |       |          |          |      |        |       |        |       |
|------------|-------|-------|----------|----------|------|--------|-------|--------|-------|
| 2011/8/29  | 87.27 | 87.27 | 75106.68 | 44920.05 | 3.86 | 93.4   | 96.52 | 1788.4 | 40.54 |
| 2011/8/30  | 88.9  | 88.9  | 75106.68 | 44920.05 | 3.91 | 94.05  | 96.19 | 1826.7 | 41.4  |
| 2011/8/31  | 88.81 | 88.81 | 75106.68 | 44920.05 | 4.05 | 94.33  | 97.07 | 1828.5 | 41.7  |
| 2011/9/1   | 88.93 | 88.93 | 74425.57 | 44249.05 | 4.05 | 95.19  | 97.52 | 1826   | 41.48 |
| 2011/9/2   | 86.45 | 86.45 | 74425.57 | 44249.05 | 3.87 | 95     | 97.25 | 1873.7 | 43.02 |
| 2011/9/6   | 86.02 | 85.99 | 74425.57 | 44249.05 | 3.94 | 96.62  | 95.89 | 1869.9 | 41.82 |
| 2011/9/7   | 89.34 | 89.34 | 74425.57 | 44249.05 | 3.94 | 96.37  | 97.07 | 1814.2 | 41.57 |
| 2011/9/8   | 89.05 | 89.05 | 74425.57 | 44249.05 | 3.98 | 96.52  | 97.35 | 1854.4 | 42.48 |
| 2011/9/9   | 87.24 | 87.24 | 74425.57 | 44249.05 | 3.92 | 97.01  | 96.49 | 1856.4 | 41.57 |
| 2011/9/12  | 88.19 | 88.19 | 74425.57 | 44249.05 | 3.89 | 97.15  | 95.51 | 1809.9 | 40.16 |
| 2011/9/13  | 90.21 | 90.21 | 74425.57 | 44249.05 | 3.98 | 97.63  | 95.74 | 1826.8 | 41.12 |
| 2011/9/14  | 88.91 | 88.91 | 74425.57 | 44249.05 | 4.04 | 97.72  | 95.82 | 1823.5 | 40.47 |
| 2011/9/15  | 89.4  | 89.4  | 74425.57 | 44249.05 | 3.88 | 97.54  | 95.22 | 1778.5 | 39.45 |
| 2011/9/16  | 87.96 | 87.96 | 74425.57 | 44249.05 | 3.81 | 97.6   | 95.04 | 1812.1 | 40.78 |
| 2011/9/19  | 85.7  | 85.7  | 74425.57 | 44249.05 | 3.83 | 98.18  | 94.15 | 1776.4 | 39.11 |
| 2011/9/20  | 86.89 | 86.92 | 74425.57 | 44249.05 | 3.8  | 97.9   | 92.5  | 1806.6 | 39.92 |
| 2011/9/21  | 85.92 | 85.77 | 74425.57 | 44249.05 | 3.73 | 99.33  | 92.79 | 1805.5 | 40.42 |
| 2011/9/22  | 80.51 | 80.29 | 74425.57 | 44249.05 | 3.71 | 100.45 | 92.66 | 1739.2 | 36.54 |
| 2011/9/23  | 79.85 | 79.58 | 74425.57 | 44249.05 | 3.7  | 99.62  | 92.4  | 1642.5 | 34.74 |
| 2011/9/26  | 80.24 | 79.97 | 74425.57 | 44249.05 | 3.78 | 99.03  | 91.23 | 1592.5 | 29.93 |
| 2011/9/27  | 84.45 | 84.18 | 74425.57 | 44249.05 | 3.83 | 98.53  | 91.14 | 1650.6 | 31.5  |
| 2011/9/28  | 81.21 | 80.94 | 74425.57 | 44249.05 | 3.76 | 98.98  | 91.9  | 1650   | 30.09 |
| 2011/9/29  | 82.14 | 81.87 | 74425.57 | 44249.05 | 3.75 | 98.74  | 91.82 | 1615.5 | 30.44 |
| 2011/9/30  | 79.2  | 78.93 | 74425.57 | 44249.05 | 3.67 | 98.86  | 91.27 | 1620.4 | 30.28 |
| 2011/10/3  | 77.61 | 77.34 | 74949.51 | 43755.5  | 3.62 | 100.14 | 90.02 | 1656   | 30.35 |
| 2011/10/4  | 75.67 | 75.4  | 74949.51 | 43755.5  | 3.64 | 99.86  | 90.36 | 1614.7 | 30.63 |
| 2011/10/5  | 79.68 | 79.41 | 74949.51 | 43755.5  | 3.57 | 100.01 | 90.52 | 1640.3 | 28.61 |
| 2011/10/6  | 82.59 | 82.32 | 74949.51 | 43755.5  | 3.6  | 100.13 | 90.86 | 1651.9 | 30.47 |
| 2011/10/7  | 82.98 | 82.7  | 74949.51 | 43755.5  | 3.48 | 99.33  | 91.21 | 1634.5 | 30.96 |
| 2011/10/10 | 85.41 | 85.14 | 74949.51 | 43755.5  | 3.54 | 98.7   | 91.33 | 1669.6 | 32.2  |
| 2011/10/11 | 85.81 | 85.54 | 74949.51 | 43755.5  | 3.62 | 99.11  | 92.68 | 1664.2 | 31.96 |
| 2011/10/12 | 85.57 | 85.3  | 74949.51 | 43755.5  | 3.49 | 98.15  | 93.06 | 1681.3 | 32.75 |
| 2011/10/13 | 84.23 | 83.96 | 74949.51 | 43755.5  | 3.53 | 98.05  | 92.78 | 1667.3 | 31.63 |
| 2011/10/14 | 86.8  | 86.8  | 74949.51 | 43755.5  | 3.7  | 97.67  | 93.3  | 1681.8 | 32.14 |
| 2011/10/17 | 86.38 | 86.38 | 74949.51 | 43755.5  | 3.69 | 98.18  | 93.71 | 1672.9 | 31.99 |
| 2011/10/18 | 88.34 | 88.34 | 74949.51 | 43755.5  | 3.55 | 98.42  | 93.44 | 1657.7 | 30.75 |
| 2011/10/19 | 86.11 | 86.11 | 74949.51 | 43755.5  | 3.59 | 97.98  | 93.5  | 1641.8 | 31.25 |
| 2011/10/20 | 85.3  | 86.07 | 74949.51 | 43755.5  | 3.63 | 97.9   | 92.54 | 1611.9 | 30.27 |
| 2011/10/21 | 87.4  | 87.19 | 74949.51 | 43755.5  | 3.63 | 96.9   | 92.19 | 1635.1 | 31.17 |
| 2011/10/24 | 91.27 | 91.12 | 74949.51 | 43755.5  | 3.6  | 96.64  | 92.6  | 1651.5 | 32    |
| 2011/10/25 | 93.17 | 92.98 | 74949.51 | 43755.5  | 3.66 | 96.57  | 93.49 | 1702.1 | 33.03 |
| 2011/10/26 | 90.2  | 90.2  | 74949.51 | 43755.5  | 3.59 | 96.84  | 93.12 | 1723.5 | 33.29 |
| 2011/10/27 | 93.96 | 93.96 | 74949.51 | 43755.5  | 3.52 | 96     | 94.18 | 1735.5 | 35.32 |
| 2011/10/28 | 93.32 | 93.32 | 74949.51 | 43755.5  | 3.92 | 95.8   | 94.83 | 1744.2 | 35.28 |
| 2011/10/31 | 93.19 | 93.19 | 74949.51 | 43755.5  | 3.93 | 96.1   | 94.31 | 1724   | 34.41 |
| 2011/11/1  | 92.19 | 92.19 | 75930.91 | 44848.56 | 3.78 | 97.09  | 92.62 | 1711   | 32.72 |
| 2011/11/2  | 92.51 | 92.51 | 75930.91 | 44848.56 | 3.75 | 97.09  | 92.66 | 1733.9 | 33.86 |
| 2011/11/3  | 94.07 | 94.07 | 75930.91 | 44848.56 | 3.78 | 96.57  | 92.76 | 1737.4 | 34.49 |
| 2011/11/4  | 94.26 | 94.26 | 75930.91 | 44848.56 | 3.78 | 96.59  | 92.76 | 1757   | 34.13 |
| 2011/11/7  | 95.52 | 95.52 | 75930.91 | 44848.56 | 3.7  | 96.42  | 92.83 | 1797   | 34.71 |
| 2011/11/8  | 96.8  | 96.8  | 75930.91 | 44848.56 | 3.75 | 96.24  | 92.82 | 1798.4 | 35.14 |
| 2011/11/9  | 95.74 | 95.74 | 75930.91 | 44848.56 | 3.65 | 97.24  | 93.92 | 1782.4 | 34.97 |
| 2011/11/10 | 97.78 | 97.78 | 75930.91 | 44848.56 | 3.65 | 97.18  | 92.67 | 1766.8 | 34.1  |
| 2011/11/11 | 98.99 | 98.99 | 75930.91 | 44848.56 | 3.58 | 96.37  | 93.45 | 1787.5 | 34.67 |

|            |        |        |          |          |      |        |       |        |       |
|------------|--------|--------|----------|----------|------|--------|-------|--------|-------|
| 2011/11/14 | 98.14  | 98.14  | 75930.91 | 44848.56 | 3.46 | 97.31  | 93.34 | 1779.3 | 34.01 |
| 2011/11/15 | 99.37  | 99.37  | 75930.91 | 44848.56 | 3.4  | 97.87  | 93.19 | 1763.2 | 34.45 |
| 2011/11/16 | 102.59 | 102.59 | 75930.91 | 44848.56 | 3.34 | 98.41  | 93.46 | 1771.2 | 34.24 |
| 2011/11/17 | 98.82  | 98.82  | 75930.91 | 44848.56 | 3.41 | 98.29  | 93.94 | 1720.6 | 31.49 |
| 2011/11/18 | 97.41  | 97.67  | 75930.91 | 44848.56 | 3.32 | 98.01  | 93.13 | 1725.8 | 32.41 |
| 2011/11/21 | 96.92  | 96.73  | 75930.91 | 44848.56 | 3.4  | 99.01  | 93.15 | 1683.4 | 31.11 |
| 2011/11/22 | 98.01  | 97.76  | 75930.91 | 44848.56 | 3.42 | 99.06  | 93.43 | 1696   | 32.95 |
| 2011/11/23 | 96.17  | 96.16  | 75930.91 | 44848.56 | 3.46 | 99.75  | 93.19 | 1690.1 | 31.62 |
| 2011/11/25 | 96.77  | 96.91  | 75930.91 | 44848.56 | 3.54 | 100.33 | 93.07 | 1675.3 | 31.19 |
| 2011/11/28 | 98.21  | 98.21  | 75930.91 | 44848.56 | 3.36 | 99.85  | 93.42 | 1710.8 | 32.16 |
| 2011/11/29 | 99.79  | 99.79  | 75930.91 | 44848.56 | 3.63 | 99.3   | 93.51 | 1713.4 | 31.85 |
| 2011/11/30 | 100.36 | 100.36 | 75930.91 | 44848.56 | 3.55 | 98.58  | 93.14 | 1745.5 | 32.73 |
| 2011/12/1  | 100.2  | 100.2  | 76325.64 | 44957.98 | 3.65 | 99.45  | 93.92 | 1743.6 | 32.68 |
| 2011/12/2  | 100.96 | 100.97 | 76325.64 | 44957.98 | 3.58 | 100.07 | 94.02 | 1745.5 | 32.64 |
| 2011/12/5  | 100.99 | 100.94 | 76325.64 | 44957.98 | 3.46 | 99.72  | 94.13 | 1730.1 | 31.98 |
| 2011/12/6  | 101.28 | 101.25 | 76325.64 | 44957.98 | 3.49 | 100.02 | 93.63 | 1727.9 | 32.67 |
| 2011/12/7  | 100.49 | 100.45 | 76325.64 | 44957.98 | 3.42 | 99.33  | 93.39 | 1733.5 | 32.59 |
| 2011/12/8  | 98.34  | 98.35  | 76325.64 | 44957.98 | 3.46 | 99.85  | 92.7  | 1709.7 | 31.6  |
| 2011/12/9  | 99.41  | 99.4   | 76325.64 | 44957.98 | 3.32 | 99.58  | 92.32 | 1712.8 | 32.17 |
| 2011/12/12 | 97.77  | 97.77  | 76325.64 | 44957.98 | 3.25 | 100.15 | 92.75 | 1664.1 | 31.25 |
| 2011/12/13 | 100.14 | 100.24 | 76325.64 | 44957.98 | 3.28 | 100.8  | 92.02 | 1631.2 | 30.6  |
| 2011/12/14 | 94.95  | 94.92  | 76325.64 | 44957.98 | 3.14 | 100.89 | 92.48 | 1574.9 | 28.85 |
| 2011/12/15 | 93.87  | 93.84  | 76325.64 | 44957.98 | 3.13 | 100.6  | 92.22 | 1574.6 | 29.23 |
| 2011/12/16 | 93.53  | 93.55  | 76325.64 | 44957.98 | 3.13 | 100.4  | 92.16 | 1595.6 | 29.62 |
| 2011/12/19 | 93.88  | 93.86  | 76325.64 | 44957.98 | 3.1  | 100.69 | 91.58 | 1592.9 | 28.68 |
| 2011/12/20 | 97.22  | 97.16  | 76325.64 | 44957.98 | 3.13 | 99.63  | 91.38 | 1615   | 29.49 |
| 2011/12/21 | 98.67  | 98.54  | 76325.64 | 44957.98 | 3.16 | 99.53  | 91.32 | 1615.2 | 29.23 |
| 2011/12/22 | 99.53  | 99.42  | 76325.64 | 44957.98 | 3.17 | 99.55  | 91.9  | 1608.9 | 29    |
| 2011/12/23 | 99.68  | 99.72  | 76325.64 | 44957.98 | 3.11 | 100.13 | 92.7  | 1607.1 | 29.02 |
| 2011/12/27 | 101.34 | 101.29 | 76325.64 | 44957.98 | 3.11 | 99.58  | 93.4  | 1593.5 | 28.97 |
| 2011/12/28 | 99.36  | 99.44  | 76325.64 | 44957.98 | 3.08 | 100.96 | 92    | 1563.5 | 27.46 |
| 2011/12/29 | 99.65  | 99.68  | 76325.64 | 44957.98 | 3.03 | 101.22 | 91.81 | 1545.1 | 27.52 |
| 2011/12/30 | 98.83  | 98.83  | 76325.64 | 44957.98 | 2.99 | 100.44 | 91.64 | 1561   | 27.78 |
| 2012/1/3   | 102.96 | 102.96 | 76528.33 | 44274.48 | 2.99 | 98.76  | 91.64 | 1599.7 | 29.53 |
| 2012/1/4   | 103.22 | 103.22 | 76528.33 | 44274.48 | 3.1  | 98.95  | 91.64 | 1613.9 | 29.06 |
| 2012/1/5   | 101.81 | 101.81 | 76528.33 | 44274.48 | 2.98 | 99.75  | 91.64 | 1621.4 | 29.2  |
| 2012/1/6   | 101.56 | 101.56 | 76528.33 | 44274.48 | 3.06 | 100.19 | 91.64 | 1621   | 28.76 |
| 2012/1/9   | 101.31 | 101.31 | 76528.33 | 44274.48 | 3.01 | 99.95  | 91.64 | 1610.9 | 28.8  |
| 2012/1/10  | 102.24 | 102.24 | 76528.33 | 44274.48 | 2.94 | 99.82  | 91.28 | 1635.5 | 29.9  |
| 2012/1/11  | 100.87 | 100.89 | 76528.33 | 44274.48 | 2.77 | 100.83 | 91.89 | 1643.6 | 29.95 |
| 2012/1/12  | 99.1   | 99.03  | 76528.33 | 44274.48 | 2.7  | 100.79 | 92.72 | 1647.4 | 30.1  |
| 2012/1/13  | 98.7   | 98.69  | 76528.33 | 44274.48 | 2.67 | 100.91 | 92.65 | 1636.3 | 29.5  |
| 2012/1/17  | 100.71 | 100.7  | 76528.33 | 44274.48 | 2.49 | 100.79 | 92.81 | 1657.8 | 30.13 |
| 2012/1/18  | 100.59 | 100.61 | 76528.33 | 44274.48 | 2.47 | 100.1  | 92.91 | 1658.1 | 30.44 |
| 2012/1/19  | 100.39 | 100.32 | 76528.33 | 44274.48 | 2.32 | 99.77  | 92.71 | 1653.6 | 30.34 |
| 2012/1/20  | 98.46  | 98.15  | 76528.33 | 44274.48 | 2.34 | 99.23  | 92.87 | 1663.6 | 32.04 |
| 2012/1/23  | 99.58  | 99.47  | 76528.33 | 44274.48 | 2.53 | 99.23  | 92.49 | 1677.5 | 32.25 |
| 2012/1/24  | 98.95  | 98.84  | 76528.33 | 44274.48 | 2.55 | 98.91  | 93.69 | 1668.2 | 32.01 |
| 2012/1/25  | 99.4   | 99.23  | 76528.33 | 44274.48 | 2.73 | 98.71  | 94.08 | 1706.2 | 33.19 |
| 2012/1/26  | 99.7   | 99.76  | 76528.33 | 44274.48 | 2.61 | 98.51  | 94.69 | 1721   | 33.43 |
| 2012/1/27  | 99.56  | 99.47  | 76528.33 | 44274.48 | 2.68 | 98.27  | 94.52 | 1732   | 33.75 |
| 2012/1/30  | 98.78  | 98.75  | 76528.33 | 44274.48 | 2.71 | 98.37  | 94.52 | 1731.4 | 33.5  |
| 2012/1/31  | 98.48  | 98.46  | 76528.33 | 44274.48 | 2.5  | 98.03  | 94.47 | 1735   | 33.08 |
| 2012/2/1   | 97.61  | 97.63  | 76765.12 | 46330.93 | 2.38 | 97.7   | 94.36 | 1743.4 | 33.8  |

|           |        |        |          |          |      |       |       |        |       |
|-----------|--------|--------|----------|----------|------|-------|-------|--------|-------|
| 2012/2/2  | 96.36  | 96.36  | 76765.12 | 46330.93 | 2.55 | 97.87 | 94.28 | 1751.6 | 34.34 |
| 2012/2/3  | 97.84  | 97.8   | 76765.12 | 46330.93 | 2.5  | 97.79 | 94.22 | 1725.1 | 33.62 |
| 2012/2/6  | 96.91  | 96.89  | 76765.12 | 46330.93 | 2.55 | 97.74 | 94.55 | 1720.1 | 33.75 |
| 2012/2/7  | 98.41  | 98.55  | 76765.12 | 46330.93 | 2.47 | 97.29 | 94.75 | 1735   | 34.29 |
| 2012/2/8  | 98.71  | 98.8   | 76765.12 | 46330.93 | 2.45 | 97.8  | 95.46 | 1732.2 | 33.73 |
| 2012/2/9  | 99.84  | 99.88  | 76765.12 | 46330.93 | 2.48 | 97.78 | 95.89 | 1729.8 | 33.92 |
| 2012/2/10 | 98.67  | 98.68  | 76765.12 | 46330.93 | 2.48 | 98.17 | 95.59 | 1717.2 | 33.6  |
| 2012/2/13 | 100.91 | 100.39 | 76765.12 | 46330.93 | 2.43 | 98.11 | 95.51 | 1723.2 | 33.76 |
| 2012/2/14 | 100.74 | 100.82 | 76765.12 | 46330.93 | 2.53 | 98.56 | 95.36 | 1715.3 | 33.69 |
| 2012/2/15 | 101.8  | 101.82 | 76765.12 | 46330.93 | 2.43 | 98.57 | 95.7  | 1726.6 | 33.36 |
| 2012/2/16 | 102.31 | 102.33 | 76765.12 | 46330.93 | 2.57 | 97.88 | 95.22 | 1728.1 | 33.34 |
| 2012/2/17 | 103.24 | 103.27 | 76765.12 | 46330.93 | 2.68 | 97.75 | 95.13 | 1722.5 | 33.39 |
| 2012/2/21 | 105.84 | 105.88 | 76765.12 | 46330.93 | 2.63 | 98.04 | 95.56 | 1759.5 | 34.36 |
| 2012/2/22 | 106.28 | 105.99 | 76765.12 | 46330.93 | 2.64 | 98.73 | 95.92 | 1777   | 34.08 |
| 2012/2/23 | 107.83 | 107.44 | 76765.12 | 46330.93 | 2.62 | 98.25 | 95.92 | 1780.6 | 35.17 |
| 2012/2/24 | 109.77 | 109.39 | 76765.12 | 46330.93 | 2.55 | 97.42 | 97.26 | 1773.2 | 35.58 |
| 2012/2/27 | 108.56 | 108.49 | 76765.12 | 46330.93 | 2.45 | 97.75 | 97.58 | 1775   | 35.52 |
| 2012/2/28 | 106.55 | 106.59 | 76765.12 | 46330.93 | 2.52 | 97.28 | 98.27 | 1786.2 | 36.85 |
| 2012/2/29 | 107.07 | 107.08 | 76765.12 | 46330.93 | 2.62 | 97.17 | 97.28 | 1705   | 36    |
| 2012/3/1  | 108.84 | 108.76 | 76566.09 | 44310.23 | 2.46 | 96.52 | 96.55 | 1722.9 | 35.46 |
| 2012/3/2  | 106.7  | 106.68 | 76566.09 | 44310.23 | 2.48 | 97.27 | 96.4  | 1711.2 | 35.25 |
| 2012/3/5  | 106.72 | 106.7  | 76566.09 | 44310.23 | 2.36 | 97.07 | 97.03 | 1706.5 | 33.99 |
| 2012/3/6  | 104.7  | 104.71 | 76566.09 | 44310.23 | 2.36 | 97.96 | 96.31 | 1683   | 32.93 |
| 2012/3/7  | 106.16 | 106.16 | 76566.09 | 44310.23 | 2.3  | 97.83 | 96.41 | 1684   | 33.4  |
| 2012/3/8  | 106.58 | 106.65 | 76566.09 | 44310.23 | 2.27 | 97.28 | 96.41 | 1700.9 | 33.79 |
| 2012/3/9  | 107.4  | 107.4  | 76566.09 | 44310.23 | 2.32 | 98.25 | 96.41 | 1706   | 34.21 |
| 2012/3/12 | 106.34 | 106.34 | 76566.09 | 44310.23 | 2.27 | 98.5  | 96.66 | 1699.2 | 33.37 |
| 2012/3/13 | 106.71 | 106.7  | 76566.09 | 44310.23 | 2.3  | 98.05 | 97.43 | 1693.7 | 33.54 |
| 2012/3/14 | 105.43 | 105.49 | 76566.09 | 44310.23 | 2.28 | 98.29 | 97.29 | 1642.5 | 32.15 |
| 2012/3/15 | 105.11 | 105.19 | 76566.09 | 44310.23 | 2.28 | 98.01 | 96.98 | 1658   | 32.69 |
| 2012/3/16 | 107.06 | 107.03 | 76566.09 | 44310.23 | 2.33 | 97.27 | 97.49 | 1655.5 | 32.57 |
| 2012/3/19 | 108.09 | 108.09 | 76566.09 | 44310.23 | 2.35 | 96.91 | 97.14 | 1666.9 | 32.93 |
| 2012/3/20 | 105.61 | 105.68 | 76566.09 | 44310.23 | 2.34 | 97.12 | 97.1  | 1650   | 32.25 |
| 2012/3/21 | 107.27 | 106.87 | 76566.09 | 44310.23 | 2.36 | 97.06 | 96.97 | 1652.1 | 32.12 |
| 2012/3/22 | 105.35 | 104.98 | 76566.09 | 44310.23 | 2.27 | 97.37 | 96.87 | 1643.2 | 31.38 |
| 2012/3/23 | 106.87 | 106.43 | 76566.09 | 44310.23 | 2.28 | 97.04 | 96.39 | 1662.3 | 32.14 |
| 2012/3/26 | 107.03 | 107.07 | 76566.09 | 44310.23 | 2.23 | 96.44 | 97.09 | 1692   | 32.6  |
| 2012/3/27 | 107.33 | 107.32 | 76566.09 | 44310.23 | 2.21 | 96.56 | 97.39 | 1684.7 | 32.6  |
| 2012/3/28 | 105.41 | 105.4  | 76566.09 | 44310.23 | 2.19 | 96.93 | 97.1  | 1665   | 32.14 |
| 2012/3/29 | 102.78 | 102.79 | 76566.09 | 44310.23 | 2.15 | 96.54 | 96.57 | 1658   | 32.15 |
| 2012/3/30 | 103.02 | 103.03 | 76566.09 | 44310.23 | 2.13 | 96.21 | 95.74 | 1668.1 | 32.36 |
| 2012/4/2  | 105.23 | 105.25 | 76882.16 | 44159.28 | 2.15 | 96.43 | 95.94 | 1676.2 | 32.97 |
| 2012/4/3  | 104.01 | 104.02 | 76882.16 | 44159.28 | 2.19 | 97.1  | 96.08 | 1646   | 32.6  |
| 2012/4/4  | 101.47 | 101.53 | 76882.16 | 44159.28 | 2.14 | 97.23 | 96.54 | 1612.3 | 31.03 |
| 2012/4/5  | 103.31 | 103.29 | 76882.16 | 44159.28 | 2.09 | 97.63 | 96.44 | 1626.3 | 31.75 |
| 2012/4/9  | 102.46 | 102.45 | 76882.16 | 44159.28 | 2.11 | 97.18 | 95.89 | 1631.1 | 31.51 |
| 2012/4/10 | 101.02 | 101.12 | 76882.16 | 44159.28 | 2.03 | 97.39 | 95.93 | 1659.5 | 31.67 |
| 2012/4/11 | 102.7  | 102.66 | 76882.16 | 44159.28 | 1.98 | 97.12 | 95.15 | 1656.6 | 31.51 |
| 2012/4/12 | 103.64 | 103.69 | 76882.16 | 44159.28 | 1.98 | 96.82 | 95.76 | 1669   | 32.37 |
| 2012/4/13 | 102.83 | 102.84 | 76882.16 | 44159.28 | 1.98 | 97.44 | 96.05 | 1658.2 | 31.38 |
| 2012/4/16 | 102.93 | 102.92 | 76882.16 | 44159.28 | 2.02 | 97.18 | 95.7  | 1651.3 | 31.36 |
| 2012/4/17 | 104.2  | 104.23 | 76882.16 | 44159.28 | 1.95 | 97.02 | 95.67 | 1650.2 | 31.67 |
| 2012/4/18 | 102.67 | 102.65 | 76882.16 | 44159.28 | 1.95 | 96.46 | 96.17 | 1640.1 | 31.55 |
| 2012/4/19 | 102.27 | 102.38 | 76882.16 | 44159.28 | 1.91 | 96.25 | 95.13 | 1639.4 | 31.72 |

|           |        |        |          |          |      |        |       |        |       |
|-----------|--------|--------|----------|----------|------|--------|-------|--------|-------|
| 2012/4/20 | 103.05 | 103.58 | 76882.16 | 44159.28 | 1.93 | 95.84  | 95.11 | 1642.1 | 31.64 |
| 2012/4/23 | 103.11 | 102.68 | 76882.16 | 44159.28 | 2.01 | 95.82  | 95.08 | 1638.5 | 30.82 |
| 2012/4/24 | 103.55 | 103.1  | 76882.16 | 44159.28 | 1.98 | 95.71  | 94.84 | 1635   | 30.78 |
| 2012/4/25 | 104.12 | 103.72 | 76882.16 | 44159.28 | 2.07 | 95.55  | 95.36 | 1643.6 | 30.93 |
| 2012/4/26 | 104.55 | 104.56 | 76882.16 | 44159.28 | 2.04 | 95.5   | 95.12 | 1658.5 | 30.76 |
| 2012/4/27 | 104.93 | 104.86 | 76882.16 | 44159.28 | 2.19 | 95.01  | 94.75 | 1663.2 | 31.23 |
| 2012/4/30 | 104.87 | 104.89 | 76882.16 | 44159.28 | 2.29 | 95.15  | 94.75 | 1665.7 | 31.23 |
| 2012/5/1  | 106.16 | 106.17 | 76177.2  | 43849.87 | 2.37 | 95.28  | 94.75 | 1663.3 | 30.93 |
| 2012/5/2  | 105.22 | 105.25 | 76177.2  | 43849.87 | 2.25 | 95.41  | 94.01 | 1653.7 | 30.59 |
| 2012/5/3  | 102.54 | 102.56 | 76177.2  | 43849.87 | 2.34 | 95.5   | 94.02 | 1634.2 | 29.96 |
| 2012/5/4  | 98.49  | 98.49  | 76177.2  | 43849.87 | 2.28 | 95.7   | 93.65 | 1642   | 30.29 |
| 2012/5/7  | 97.94  | 97.86  | 76177.2  | 43849.87 | 2.34 | 95.41  | 93.65 | 1638.1 | 29.99 |
| 2012/5/8  | 97.01  | 97.13  | 76177.2  | 43849.87 | 2.39 | 95.66  | 93.65 | 1599.8 | 29.8  |
| 2012/5/9  | 96.81  | 96.8   | 76177.2  | 43849.87 | 2.47 | 95.79  | 93.65 | 1594.2 | 29.27 |
| 2012/5/10 | 97.08  | 97.1   | 76177.2  | 43849.87 | 2.49 | 95.8   | 92.02 | 1594.4 | 29.06 |
| 2012/5/11 | 96.13  | 96.03  | 76177.2  | 43849.87 | 2.51 | 96.17  | 92.09 | 1589.6 | 28.87 |
| 2012/5/14 | 94.78  | 94.75  | 76177.2  | 43849.87 | 2.43 | 95.99  | 92.22 | 1560.6 | 28.32 |
| 2012/5/15 | 93.98  | 93.97  | 76177.2  | 43849.87 | 2.5  | 96.59  | 91.82 | 1543.6 | 27.64 |
| 2012/5/16 | 92.81  | 92.78  | 76177.2  | 43849.87 | 2.62 | 97.12  | 90.81 | 1550   | 27.04 |
| 2012/5/17 | 92.56  | 92.53  | 76177.2  | 43849.87 | 2.59 | 97.91  | 91.13 | 1574.8 | 27.95 |
| 2012/5/18 | 91.48  | 91.51  | 76177.2  | 43849.87 | 2.74 | 97.69  | 90.43 | 1590.8 | 28.62 |
| 2012/5/21 | 92.57  | 92.57  | 76177.2  | 43849.87 | 2.61 | 97.66  | 91.01 | 1592.5 | 28.3  |
| 2012/5/22 | 91.66  | 91.44  | 76177.2  | 43849.87 | 2.71 | 98.01  | 91.15 | 1568.4 | 28.49 |
| 2012/5/23 | 89.9   | 89.4   | 76177.2  | 43849.87 | 2.74 | 98.48  | 90.73 | 1537   | 27.74 |
| 2012/5/24 | 90.66  | 90.36  | 76177.2  | 43849.87 | 2.65 | 98.62  | 90.45 | 1559.2 | 28.18 |
| 2012/5/25 | 90.86  | 90.64  | 76177.2  | 43849.87 | 2.57 | 98.68  | 90.04 | 1566.2 | 28.42 |
| 2012/5/29 | 90.76  | 90.75  | 76177.2  | 43849.87 | 2.43 | 98.84  | 88.97 | 1575.4 | 28.22 |
| 2012/5/30 | 87.82  | 87.79  | 76177.2  | 43849.87 | 2.42 | 99.81  | 88.64 | 1559.6 | 27.86 |
| 2012/5/31 | 86.53  | 86.52  | 76177.2  | 43849.87 | 2.42 | 100.31 | 86.77 | 1560   | 27.74 |
| 2012/6/1  | 83.23  | 83.17  | 76011.73 | 43822.53 | 2.33 | 100.31 | 85.42 | 1620.5 | 28.48 |
| 2012/6/4  | 83.98  | 83.95  | 76011.73 | 43822.53 | 2.42 | 100.19 | 84.57 | 1618.3 | 28.26 |
| 2012/6/5  | 84.29  | 84.31  | 76011.73 | 43822.53 | 2.45 | 100.23 | 86.83 | 1618.1 | 28.39 |
| 2012/6/6  | 85.02  | 85.05  | 76011.73 | 43822.53 | 2.42 | 99.48  | 87.37 | 1620.2 | 29.23 |
| 2012/6/7  | 84.82  | 84.78  | 76011.73 | 43822.53 | 2.27 | 99.2   | 88.96 | 1608   | 28.56 |
| 2012/6/8  | 84.1   | 84.08  | 76011.73 | 43822.53 | 2.3  | 99.71  | 87.65 | 1593.9 | 28.42 |
| 2012/6/11 | 82.7   | 82.58  | 76011.73 | 43822.53 | 2.22 | 99.59  | 87.65 | 1597   | 28.63 |
| 2012/6/12 | 83.32  | 83.35  | 76011.73 | 43822.53 | 2.23 | 98.99  | 87.65 | 1608.7 | 28.92 |
| 2012/6/13 | 82.62  | 82.56  | 76011.73 | 43822.53 | 2.19 | 99.36  | 86.91 | 1616.8 | 28.94 |
| 2012/6/14 | 83.91  | 83.83  | 76011.73 | 43822.53 | 2.5  | 99.08  | 87.74 | 1622.9 | 28.63 |
| 2012/6/15 | 84.03  | 84.03  | 76011.73 | 43822.53 | 2.47 | 98.11  | 88.14 | 1627   | 28.73 |
| 2012/6/18 | 83.27  | 83.26  | 76011.73 | 43822.53 | 2.64 | 98.35  | 87.73 | 1625.9 | 28.67 |
| 2012/6/19 | 84.03  | 83.99  | 76011.73 | 43822.53 | 2.55 | 97.99  | 86.78 | 1623.2 | 28.37 |
| 2012/6/20 | 81.8   | 81.06  | 76011.73 | 43822.53 | 2.52 | 98.11  | 86.53 | 1606   | 28.11 |
| 2012/6/21 | 78.2   | 77.91  | 76011.73 | 43822.53 | 2.58 | 98.79  | 85.76 | 1568.6 | 26.84 |
| 2012/6/22 | 79.76  | 79.33  | 76011.73 | 43822.53 | 2.63 | 98.92  | 84.58 | 1569.3 | 26.81 |
| 2012/6/25 | 79.21  | 78.76  | 76011.73 | 43822.53 | 2.69 | 98.96  | 85.76 | 1584.5 | 27.18 |
| 2012/6/26 | 79.36  | 79.34  | 76011.73 | 43822.53 | 2.77 | 98.55  | 85.44 | 1573.6 | 27.04 |
| 2012/6/27 | 80.21  | 80.27  | 76011.73 | 43822.53 | 2.77 | 98.99  | 86.22 | 1571.6 | 26.88 |
| 2012/6/28 | 77.69  | 77.72  | 76011.73 | 43822.53 | 2.72 | 99.32  | 86.07 | 1552.3 | 26.44 |
| 2012/6/29 | 84.96  | 85.04  | 76011.73 | 43822.53 | 2.82 | 98.11  | 86.17 | 1603.5 | 27.58 |
| 2012/7/2  | 83.75  | 83.72  | 76200.7  | 43920.18 | 2.82 | 98.46  | 85.87 | 1598   | 27.45 |
| 2012/7/3  | 87.66  | 87.74  | 76200.7  | 43920.18 | 2.9  | 98.49  | 85.79 | 1619   | 28.22 |
| 2012/7/5  | 87.22  | 87.11  | 76200.7  | 43920.18 | 2.95 | 99.55  | 86.42 | 1606.5 | 27.69 |
| 2012/7/6  | 84.45  | 84.37  | 76200.7  | 43920.18 | 2.78 | 99.75  | 86.44 | 1588.9 | 27.07 |



|           |       |       |          |          |      |        |       |        |       |
|-----------|-------|-------|----------|----------|------|--------|-------|--------|-------|
| 2012/7/9  | 85.99 | 85.93 | 76200.7  | 43920.18 | 2.88 | 99.52  | 85.59 | 1580.9 | 27.31 |
| 2012/7/10 | 83.91 | 83.92 | 76200.7  | 43920.18 | 2.74 | 99.59  | 85.62 | 1567.6 | 26.76 |
| 2012/7/11 | 85.81 | 85.88 | 76200.7  | 43920.18 | 2.85 | 99.66  | 85.7  | 1577   | 26.98 |
| 2012/7/12 | 86.08 | 86.02 | 76200.7  | 43920.18 | 2.87 | 100.13 | 86.55 | 1574.7 | 27.05 |
| 2012/7/13 | 87.1  | 87.15 | 76200.7  | 43920.18 | 2.87 | 99.2   | 86.86 | 1591.7 | 27.3  |
| 2012/7/16 | 88.43 | 88.41 | 76200.7  | 43920.18 | 2.8  | 98.83  | 86.2  | 1589.7 | 27.29 |
| 2012/7/17 | 89.22 | 89.07 | 76200.7  | 43920.18 | 2.8  | 98.77  | 86    | 1584.8 | 27.29 |
| 2012/7/18 | 89.87 | 89.88 | 76200.7  | 43920.18 | 2.97 | 98.71  | 86.26 | 1575.5 | 27.17 |
| 2012/7/19 | 92.66 | 92.78 | 76200.7  | 43920.18 | 3    | 98.31  | 86.97 | 1580.4 | 27.34 |
| 2012/7/20 | 91.44 | 91.56 | 76200.7  | 43920.18 | 3.08 | 98.92  | 87.25 | 1584.3 | 27.01 |
| 2012/7/23 | 88.14 | 87.77 | 76200.7  | 43920.18 | 3.12 | 99.68  | 86.84 | 1572   | 26.99 |
| 2012/7/24 | 88.5  | 88.28 | 76200.7  | 43920.18 | 3.19 | 99.66  | 86.48 | 1575   | 26.78 |
| 2012/7/25 | 88.97 | 88.8  | 76200.7  | 43920.18 | 3.07 | 99.72  | 85.49 | 1602.5 | 27.3  |
| 2012/7/26 | 89.39 | 89.4  | 76200.7  | 43920.18 | 3.11 | 98.52  | 86.6  | 1614.1 | 27.57 |
| 2012/7/27 | 90.13 | 90.13 | 76200.7  | 43920.18 | 3.01 | 98.24  | 86.64 | 1613.4 | 27.48 |
| 2012/7/30 | 89.78 | 89.8  | 76200.7  | 43920.18 | 3.21 | 98.36  | 86.56 | 1619.7 | 28.01 |
| 2012/7/31 | 88.06 | 88.08 | 76200.7  | 43920.18 | 3.21 | 98.57  | 86.91 | 1610.5 | 27.9  |
| 2012/8/1  | 88.91 | 88.99 | 76162.61 | 44223.43 | 3.17 | 99.41  | 86.64 | 1603.7 | 27.52 |
| 2012/8/2  | 87.13 | 87.22 | 76162.61 | 44223.43 | 2.92 | 99.55  | 87.11 | 1587.4 | 26.98 |
| 2012/8/3  | 91.4  | 91.4  | 76162.61 | 44223.43 | 2.88 | 98.74  | 87.02 | 1606   | 27.79 |
| 2012/8/6  | 92.2  | 92.3  | 76162.61 | 44223.43 | 2.91 | 99.02  | 88.12 | 1612.9 | 27.85 |
| 2012/8/7  | 93.67 | 93.68 | 76162.61 | 44223.43 | 2.96 | 98.88  | 88.91 | 1609.7 | 28.08 |
| 2012/8/8  | 93.35 | 93.39 | 76162.61 | 44223.43 | 2.93 | 98.65  | 89.03 | 1612.9 | 28.07 |
| 2012/8/9  | 93.36 | 93.39 | 76162.61 | 44223.43 | 2.95 | 98.8   | 89.07 | 1616.1 | 28.09 |
| 2012/8/10 | 92.87 | 92.94 | 76162.61 | 44223.43 | 2.77 | 98.48  | 88.4  | 1619.7 | 28.06 |
| 2012/8/13 | 92.73 | 92.76 | 76162.61 | 44223.43 | 2.73 | 98.5   | 87.95 | 1609.6 | 27.85 |
| 2012/8/14 | 93.43 | 93.4  | 76162.61 | 44223.43 | 2.83 | 98.53  | 88.04 | 1599.4 | 27.76 |
| 2012/8/15 | 94.33 | 94.35 | 76162.61 | 44223.43 | 2.75 | 98.51  | 88.06 | 1603.7 | 27.81 |
| 2012/8/16 | 95.6  | 95.66 | 76162.61 | 44223.43 | 2.72 | 98.16  | 88.02 | 1616.1 | 28.21 |
| 2012/8/17 | 96.01 | 96    | 76162.61 | 44223.43 | 2.72 | 98.39  | 87.8  | 1614.2 | 28    |
| 2012/8/20 | 95.97 | 96.03 | 76162.61 | 44223.43 | 2.78 | 98.34  | 87.39 | 1620.6 | 28.59 |
| 2012/8/21 | 96.68 | 96.55 | 76162.61 | 44223.43 | 2.78 | 97.86  | 87.32 | 1636.3 | 29.26 |
| 2012/8/22 | 97.26 | 96.89 | 76162.61 | 44223.43 | 2.83 | 97.25  | 87.56 | 1642.6 | 29.75 |
| 2012/8/23 | 96.27 | 95.87 | 76162.61 | 44223.43 | 2.8  | 97.4   | 87.24 | 1669.6 | 30.45 |
| 2012/8/24 | 96.15 | 95.78 | 76162.61 | 44223.43 | 2.7  | 97.75  | 87.13 | 1669   | 30.63 |
| 2012/8/27 | 95.47 | 95.54 | 76162.61 | 44223.43 | 2.65 | 97.82  | 87.23 | 1663.9 | 31.01 |
| 2012/8/28 | 96.33 | 96.3  | 76162.61 | 44223.43 | 2.61 | 97.64  | 86.98 | 1666.5 | 30.87 |
| 2012/8/29 | 95.49 | 95.5  | 76162.61 | 44223.43 | 2.63 | 97.58  | 86.61 | 1665.2 | 30.83 |
| 2012/8/30 | 94.62 | 94.61 | 76162.61 | 44223.43 | 2.75 | 97.86  | 85.94 | 1653.5 | 30.37 |
| 2012/8/31 | 96.47 | 96.47 | 76162.61 | 44223.43 | 2.8  | 97.36  | 85.37 | 1690   | 31.37 |
| 2012/9/4  | 95.3  | 95.34 | 75610.51 | 43322.06 | 2.85 | 97.27  | 85.69 | 1694.8 | 31.9  |
| 2012/9/5  | 95.36 | 95.37 | 75610.51 | 43322.06 | 2.8  | 97.11  | 85.26 | 1690.8 | 32.27 |
| 2012/9/6  | 95.53 | 95.58 | 75610.51 | 43322.06 | 2.78 | 96.91  | 85.69 | 1704.1 | 32.65 |
| 2012/9/7  | 96.42 | 96.41 | 75610.51 | 43322.06 | 2.68 | 96.36  | 85.91 | 1737.5 | 33.63 |
| 2012/9/10 | 96.54 | 96.52 | 75610.51 | 43322.06 | 2.81 | 96.36  | 86.41 | 1727.2 | 33.31 |
| 2012/9/11 | 97.17 | 97.03 | 75610.51 | 43322.06 | 2.99 | 96.1   | 86.21 | 1735.5 | 33.42 |
| 2012/9/12 | 97.01 | 97.02 | 75610.51 | 43322.06 | 3.06 | 95.86  | 86.67 | 1731   | 32.96 |
| 2012/9/13 | 98.31 | 98.3  | 75610.51 | 43322.06 | 3.04 | 95.61  | 86.72 | 1767.5 | 34.63 |
| 2012/9/14 | 99    | 98.94 | 75610.51 | 43322.06 | 2.94 | 95.24  | 87.93 | 1769.8 | 34.6  |
| 2012/9/17 | 96.62 | 96.51 | 75610.51 | 43322.06 | 2.87 | 95.03  | 88.47 | 1757.8 | 34.19 |
| 2012/9/18 | 95.29 | 95.25 | 75610.51 | 43322.06 | 2.77 | 95.07  | 87.55 | 1766.4 | 34.64 |
| 2012/9/19 | 91.98 | 91.97 | 75610.51 | 43322.06 | 2.76 | 95.2   | 87.45 | 1769   | 34.52 |
| 2012/9/20 | 91.87 | 92.14 | 75610.51 | 43322.06 | 2.8  | 95.23  | 85.87 | 1768.6 | 34.61 |
| 2012/9/21 | 92.89 | 92.64 | 75610.51 | 43322.06 | 2.89 | 95.2   | 86.71 | 1773   | 34.57 |

|            |       |       |          |          |      |       |       |        |       |
|------------|-------|-------|----------|----------|------|-------|-------|--------|-------|
| 2012/9/24  | 91.93 | 91.68 | 75610.51 | 43322.06 | 2.84 | 95.19 | 86.48 | 1762.1 | 33.92 |
| 2012/9/25  | 91.37 | 91.07 | 75610.51 | 43322.06 | 2.92 | 95.35 | 86.63 | 1772.6 | 34.12 |
| 2012/9/26  | 89.98 | 89.92 | 75610.51 | 43322.06 | 3.02 | 95.51 | 86.94 | 1750.6 | 33.71 |
| 2012/9/27  | 91.85 | 91.89 | 75610.51 | 43322.06 | 3.3  | 95.11 | 86.88 | 1773.2 | 34.64 |
| 2012/9/28  | 92.19 | 92.18 | 75610.51 | 43322.06 | 3.32 | 95.54 | 87.38 | 1771.1 | 34.52 |
| 2012/10/1  | 92.48 | 92.44 | 76243.39 | 44739.35 | 3.48 | 96.25 | 87.03 | 1780.5 | 34.88 |
| 2012/10/2  | 91.89 | 91.88 | 76243.39 | 44739.35 | 3.53 | 96.27 | 87.32 | 1773.3 | 34.65 |
| 2012/10/3  | 88.14 | 88.19 | 76243.39 | 44739.35 | 3.4  | 96.56 | 87.46 | 1778.6 | 34.63 |
| 2012/10/4  | 91.71 | 91.69 | 76243.39 | 44739.35 | 3.41 | 95.89 | 87.62 | 1794.1 | 35.04 |
| 2012/10/5  | 89.88 | 89.87 | 76243.39 | 44739.35 | 3.4  | 96.26 | 87.61 | 1781.8 | 34.73 |
| 2012/10/8  | 89.33 | 89.43 | 76243.39 | 44739.35 | 3.4  | 96.92 | 87.9  | 1773.5 | 33.98 |
| 2012/10/9  | 92.39 | 92.42 | 76243.39 | 44739.35 | 3.47 | 97.03 | 88.13 | 1763   | 33.95 |
| 2012/10/10 | 91.25 | 91.24 | 76243.39 | 44739.35 | 3.48 | 97.03 | 87.91 | 1761.2 | 33.75 |
| 2012/10/11 | 92.07 | 92.19 | 76243.39 | 44739.35 | 3.6  | 96.75 | 88.03 | 1768.8 | 34.05 |
| 2012/10/12 | 91.86 | 91.83 | 76243.39 | 44739.35 | 3.61 | 96.62 | 88.31 | 1754.1 | 33.74 |
| 2012/10/15 | 91.85 | 91.84 | 76243.39 | 44739.35 | 3.49 | 96.62 | 88.04 | 1736   | 32.71 |
| 2012/10/16 | 92.09 | 92.07 | 76243.39 | 44739.35 | 3.44 | 96.32 | 88.18 | 1744.3 | 32.97 |
| 2012/10/17 | 92.12 | 92.04 | 76243.39 | 44739.35 | 3.47 | 96.2  | 88.38 | 1749.7 | 33.19 |
| 2012/10/18 | 92.1  | 92    | 76243.39 | 44739.35 | 3.59 | 96.75 | 88.66 | 1743.3 | 32.84 |
| 2012/10/19 | 90.05 | 90    | 76243.39 | 44739.35 | 3.62 | 97.06 | 88.86 | 1722.8 | 32.07 |
| 2012/10/22 | 88.73 | 88.3  | 76243.39 | 44739.35 | 3.45 | 96.97 | 88.63 | 1725.1 | 32.23 |
| 2012/10/23 | 86.67 | 86.65 | 76243.39 | 44739.35 | 3.54 | 97.34 | 88.17 | 1708.3 | 31.77 |
| 2012/10/24 | 85.73 | 85.39 | 76243.39 | 44739.35 | 3.45 | 96.83 | 87.74 | 1700.5 | 31.6  |
| 2012/10/25 | 86.05 | 85.59 | 76243.39 | 44739.35 | 3.43 | 96.33 | 87.45 | 1712   | 32.05 |
| 2012/10/26 | 86.28 | 85.84 | 76243.39 | 44739.35 | 3.4  | 96.49 | 86.58 | 1711.1 | 32.03 |
| 2012/10/29 | 85.54 | 85.52 | 76243.39 | 44739.35 | 3.47 | 96.87 | 86.9  | 1707.7 | 31.73 |
| 2012/10/30 | 85.68 | 85.65 | 76243.39 | 44739.35 | 3.69 | 96.57 | 86.77 | 1710.5 | 31.79 |
| 2012/10/31 | 86.24 | 86.23 | 76243.39 | 44739.35 | 3.69 | 96.27 | 86.91 | 1717.5 | 32.29 |
| 2012/11/1  | 87.09 | 87.05 | 76756.49 | 45203.28 | 3.7  | 96.96 | 86.68 | 1717.3 | 32.23 |
| 2012/11/2  | 84.86 | 84.9  | 76756.49 | 45203.28 | 3.55 | 97.51 | 86.86 | 1677   | 30.9  |
| 2012/11/5  | 85.65 | 85.64 | 76756.49 | 45203.28 | 3.55 | 97.83 | 86.86 | 1682.2 | 31.16 |
| 2012/11/6  | 88.71 | 88.62 | 76756.49 | 45203.28 | 3.62 | 97.69 | 87.02 | 1714.5 | 31.99 |
| 2012/11/7  | 84.44 | 84.5  | 76756.49 | 45203.28 | 3.58 | 97.79 | 87.39 | 1713.2 | 31.65 |
| 2012/11/8  | 85.09 | 85.07 | 76756.49 | 45203.28 | 3.61 | 97.82 | 87.04 | 1725.4 | 32.23 |
| 2012/11/9  | 86.07 | 86.08 | 76756.49 | 45203.28 | 3.5  | 98.34 | 87.06 | 1727.6 | 32.67 |
| 2012/11/12 | 85.57 | 85.56 | 76756.49 | 45203.28 | 3.57 | 98.46 | 87.26 | 1730.3 | 32.51 |
| 2012/11/13 | 85.38 | 85.38 | 76756.49 | 45203.28 | 3.74 | 98.5  | 87.13 | 1724.2 | 32.48 |
| 2012/11/14 | 86.32 | 86.32 | 76756.49 | 45203.28 | 3.76 | 98.69 | 87.03 | 1727   | 32.87 |
| 2012/11/15 | 85.45 | 85.45 | 76756.49 | 45203.28 | 3.7  | 98.55 | 87.31 | 1711   | 32.6  |
| 2012/11/16 | 86.67 | 86.62 | 76756.49 | 45203.28 | 3.79 | 98.42 | 87.13 | 1712.3 | 32.36 |
| 2012/11/19 | 89.28 | 89.05 | 76756.49 | 45203.28 | 3.72 | 98.27 | 87.03 | 1734   | 33.18 |
| 2012/11/20 | 86.75 | 86.46 | 76756.49 | 45203.28 | 3.83 | 98.19 | 87.69 | 1722.5 | 32.99 |
| 2012/11/21 | 87.38 | 87.08 | 76756.49 | 45203.28 | 3.9  | 98    | 87.81 | 1727.9 | 33.34 |
| 2012/11/23 | 88.28 | 87.01 | 76756.49 | 45203.28 | 3.9  | 97.52 | 88.29 | 1751.3 | 34.11 |
| 2012/11/26 | 87.74 | 87.28 | 76756.49 | 45203.28 | 3.73 | 97.53 | 88.19 | 1749.5 | 34.14 |
| 2012/11/27 | 87.18 | 86.81 | 76756.49 | 45203.28 | 3.77 | 97.56 | 88.35 | 1745.6 | 34.05 |
| 2012/11/28 | 86.49 | 86.1  | 76756.49 | 45203.28 | 3.7  | 97.61 | 87.98 | 1716.3 | 33.53 |
| 2012/11/29 | 88.07 | 87.64 | 76756.49 | 45203.28 | 3.65 | 97.46 | 88.19 | 1723.9 | 34.21 |
| 2012/11/30 | 88.91 | 88.54 | 76756.49 | 45203.28 | 3.56 | 97.65 | 88.52 | 1715   | 33.61 |
| 2012/12/3  | 89.09 | 88.69 | 76701.15 | 44955.29 | 3.59 | 97.82 | 88.59 | 1715.8 | 33.64 |
| 2012/12/4  | 88.5  | 88.04 | 76701.15 | 44955.29 | 3.54 | 97.78 | 87.75 | 1708   | 32.73 |
| 2012/12/5  | 87.88 | 87.36 | 76701.15 | 44955.29 | 3.7  | 97.82 | 88.2  | 1693.7 | 32.89 |
| 2012/12/6  | 86.26 | 85.47 | 76701.15 | 44955.29 | 3.67 | 98.07 | 88.11 | 1698.9 | 32.99 |
| 2012/12/7  | 85.93 | 85.45 | 76701.15 | 44955.29 | 3.55 | 98.12 | 88.07 | 1704   | 33.05 |

|            |       |       |          |          |      |        |       |        |       |
|------------|-------|-------|----------|----------|------|--------|-------|--------|-------|
| 2012/12/10 | 85.56 | 85.14 | 76701.15 | 44955.29 | 3.46 | 97.92  | 88.54 | 1713   | 33.3  |
| 2012/12/11 | 85.79 | 85.36 | 76701.15 | 44955.29 | 3.41 | 97.68  | 88.6  | 1708.2 | 32.94 |
| 2012/12/12 | 86.77 | 86.35 | 76701.15 | 44955.29 | 3.38 | 97.47  | 88.49 | 1716.6 | 33.71 |
| 2012/12/13 | 85.89 | 85.39 | 76701.15 | 44955.29 | 3.35 | 97.69  | 88.65 | 1695.6 | 32.28 |
| 2012/12/14 | 86.73 | 86.32 | 76701.15 | 44955.29 | 3.31 | 97.36  | 88.46 | 1694.4 | 32.29 |
| 2012/12/17 | 87.2  | 86.71 | 76701.15 | 44955.29 | 3.36 | 97.14  | 87.97 | 1698.1 | 32.21 |
| 2012/12/18 | 87.93 | 87.46 | 76701.15 | 44955.29 | 3.42 | 96.85  | 87.21 | 1669.5 | 31.6  |
| 2012/12/19 | 89.51 | 89.09 | 76701.15 | 44955.29 | 3.32 | 96.89  | 87.52 | 1668.1 | 30.98 |
| 2012/12/20 | 90.13 | 89.76 | 76701.15 | 44955.29 | 3.46 | 96.68  | 87.59 | 1649   | 29.96 |
| 2012/12/21 | 88.66 | 88.2  | 76701.15 | 44955.29 | 3.45 | 97.35  | 87.74 | 1656.7 | 29.97 |
| 2012/12/24 | 88.61 | 88.29 | 76701.15 | 44955.29 | 3.35 | 97.64  | 87.89 | 1658.6 | 29.84 |
| 2012/12/26 | 90.98 | 90.71 | 76701.15 | 44955.29 | 3.39 | 97.54  | 88.71 | 1660   | 30.2  |
| 2012/12/27 | 90.87 | 90.91 | 76701.15 | 44955.29 | 3.35 | 97.77  | 88.97 | 1662.1 | 29.99 |
| 2012/12/28 | 90.8  | 90.66 | 76701.15 | 44955.29 | 3.47 | 97.35  | 89.45 | 1653.7 | 29.92 |
| 2012/12/31 | 91.82 | 91.83 | 76701.15 | 44955.29 | 3.35 | 96.9   | 89.45 | 1653.7 | 30.17 |
| 2013/1/2   | 93.12 | 93.14 | 76021.22 | 45271.35 | 3.23 | 96.06  | 89.45 | 1687.9 | 30.95 |
| 2013/1/3   | 92.92 | 92.97 | 76021.22 | 45271.35 | 3.2  | 96.92  | 89.45 | 1662   | 30.46 |
| 2013/1/4   | 93.09 | 93.12 | 76021.22 | 45271.35 | 3.29 | 97.16  | 89.45 | 1658.3 | 30.21 |
| 2013/1/7   | 93.19 | 93.2  | 76021.22 | 45271.35 | 3.27 | 96.89  | 89.45 | 1658.3 | 30.03 |
| 2013/1/8   | 93.15 | 93.21 | 76021.22 | 45271.35 | 3.22 | 97.25  | 89.45 | 1661.5 | 30.31 |
| 2013/1/9   | 93.1  | 93.08 | 76021.22 | 45271.35 | 3.11 | 97.44  | 88.37 | 1652   | 30.27 |
| 2013/1/10  | 93.82 | 93.81 | 76021.22 | 45271.35 | 3.19 | 96.6   | 88.71 | 1673.4 | 30.82 |
| 2013/1/11  | 93.56 | 93.6  | 76021.22 | 45271.35 | 3.33 | 96.81  | 88.32 | 1654.2 | 30.21 |
| 2013/1/14  | 94.14 | 94.27 | 76021.22 | 45271.35 | 3.37 | 97.12  | 88.35 | 1665.3 | 31.05 |
| 2013/1/15  | 93.28 | 93.26 | 76021.22 | 45271.35 | 3.46 | 97.19  | 88.67 | 1682.6 | 31.33 |
| 2013/1/16  | 94.24 | 94.28 | 76021.22 | 45271.35 | 3.44 | 97.55  | 88.65 | 1680   | 31.38 |
| 2013/1/17  | 95.49 | 95.49 | 76021.22 | 45271.35 | 3.49 | 97.61  | 88.84 | 1689   | 31.75 |
| 2013/1/18  | 95.56 | 95.61 | 76021.22 | 45271.35 | 3.57 | 98.42  | 89.4  | 1688.1 | 31.87 |
| 2013/1/22  | 96.24 | 96.09 | 76021.22 | 45271.35 | 3.56 | 98.58  | 90.15 | 1691.9 | 32.23 |
| 2013/1/23  | 95.23 | 95.06 | 76021.22 | 45271.35 | 3.55 | 98.53  | 90.19 | 1685.3 | 32.22 |
| 2013/1/24  | 95.95 | 95.35 | 76021.22 | 45271.35 | 3.45 | 98.9   | 90.32 | 1668   | 31.75 |
| 2013/1/25  | 95.88 | 95.15 | 76021.22 | 45271.35 | 3.44 | 98.82  | 91    | 1657.5 | 31.65 |
| 2013/1/28  | 96.44 | 95.95 | 76021.22 | 45271.35 | 3.29 | 99.49  | 91.08 | 1652.8 | 30.91 |
| 2013/1/29  | 97.57 | 97.62 | 76021.22 | 45271.35 | 3.23 | 99.06  | 91.12 | 1661.5 | 31.07 |
| 2013/1/30  | 97.94 | 97.98 | 76021.22 | 45271.35 | 3.34 | 98.82  | 91.18 | 1673   | 31.55 |
| 2013/1/31  | 97.49 | 97.65 | 76021.22 | 45271.35 | 3.34 | 98.47  | 91    | 1663.8 | 31.3  |
| 2013/2/1   | 97.77 | 97.46 | 75864.31 | 45240.45 | 3.3  | 99.36  | 90.76 | 1667.4 | 31.6  |
| 2013/2/4   | 96.17 | 96.21 | 75864.31 | 45240.45 | 3.32 | 98.95  | 91.96 | 1673.7 | 31.69 |
| 2013/2/5   | 96.64 | 96.68 | 75864.31 | 45240.45 | 3.4  | 99.6   | 91.23 | 1671   | 31.67 |
| 2013/2/6   | 96.62 | 96.44 | 75864.31 | 45240.45 | 3.42 | 99.61  | 92.2  | 1677   | 31.86 |
| 2013/2/7   | 95.83 | 95.84 | 75864.31 | 45240.45 | 3.29 | 99.29  | 91.83 | 1671.9 | 31.46 |
| 2013/2/8   | 95.72 | 95.71 | 75864.31 | 45240.45 | 3.27 | 98.76  | 91.15 | 1667.7 | 31.43 |
| 2013/2/11  | 97.03 | 97.01 | 75864.31 | 45240.45 | 3.28 | 99.62  | 90.81 | 1649.4 | 30.96 |
| 2013/2/12  | 97.51 | 97.48 | 75864.31 | 45240.45 | 3.23 | 99.6   | 91.48 | 1650.4 | 31.08 |
| 2013/2/13  | 97.01 | 97.03 | 75864.31 | 45240.45 | 3.31 | 100.37 | 91.87 | 1647.5 | 30.9  |
| 2013/2/14  | 97.31 | 97.3  | 75864.31 | 45240.45 | 3.16 | 100.68 | 92.65 | 1636.2 | 30.95 |
| 2013/2/15  | 95.86 | 95.95 | 75864.31 | 45240.45 | 3.15 | 100.54 | 92.45 | 1607.5 | 29.77 |
| 2013/2/19  | 96.66 | 96.69 | 75864.31 | 45240.45 | 3.27 | 101.11 | 92.66 | 1603.7 | 30    |
| 2013/2/20  | 94.46 | 94.92 | 75864.31 | 45240.45 | 3.28 | 102.4  | 93.15 | 1562.5 | 28.38 |
| 2013/2/21  | 92.84 | 92.79 | 75864.31 | 45240.45 | 3.25 | 102.28 | 94.11 | 1574.1 | 28.45 |
| 2013/2/22  | 93.13 | 93.12 | 75864.31 | 45240.45 | 3.29 | 102.78 | 93.18 | 1572.3 | 28.46 |
| 2013/2/25  | 93.11 | 92.74 | 75864.31 | 45240.45 | 3.41 | 102.86 | 94.16 | 1595.5 | 28.97 |
| 2013/2/26  | 92.63 | 92.63 | 75864.31 | 45240.45 | 3.43 | 103.13 | 93.1  | 1609   | 29.26 |
| 2013/2/27  | 92.76 | 92.84 | 75864.31 | 45240.45 | 3.43 | 102.9  | 93.47 | 1603   | 29.19 |

|           |       |       |          |          |      |        |       |        |       |
|-----------|-------|-------|----------|----------|------|--------|-------|--------|-------|
| 2013/2/28 | 92.05 | 92.03 | 75864.31 | 45240.45 | 3.49 | 102.86 | 93.31 | 1577.7 | 28.48 |
| 2013/3/1  | 90.68 | 90.71 | 76082.01 | 44093.19 | 3.46 | 103.77 | 92.97 | 1571.9 | 28.45 |
| 2013/3/4  | 90.12 | 90.13 | 76082.01 | 44093.19 | 3.53 | 103.26 | 93.42 | 1572.1 | 28.46 |
| 2013/3/5  | 90.82 | 90.88 | 76082.01 | 44093.19 | 3.53 | 103.16 | 93.17 | 1574.4 | 28.58 |
| 2013/3/6  | 90.43 | 90.47 | 76082.01 | 44093.19 | 3.47 | 103.91 | 93.28 | 1582.3 | 28.96 |
| 2013/3/7  | 91.56 | 91.53 | 76082.01 | 44093.19 | 3.58 | 103.94 | 93.75 | 1577.4 | 28.74 |
| 2013/3/8  | 91.95 | 92.01 | 76082.01 | 44093.19 | 3.63 | 104.62 | 93.75 | 1577   | 28.92 |
| 2013/3/11 | 92.06 | 92.07 | 76082.01 | 44093.19 | 3.65 | 104.62 | 94.04 | 1579.2 | 28.94 |
| 2013/3/12 | 92.54 | 92.44 | 76082.01 | 44093.19 | 3.65 | 104.75 | 94.31 | 1591.5 | 29.13 |
| 2013/3/13 | 92.52 | 92.47 | 76082.01 | 44093.19 | 3.68 | 104.61 | 94.21 | 1588   | 28.88 |
| 2013/3/14 | 93.03 | 93.03 | 76082.01 | 44093.19 | 3.81 | 103.43 | 93.95 | 1587.9 | 28.67 |
| 2013/3/15 | 93.45 | 93.49 | 76082.01 | 44093.19 | 3.87 | 103.24 | 92.97 | 1594.4 | 28.79 |
| 2013/3/18 | 93.74 | 93.71 | 76082.01 | 44093.19 | 3.88 | 103.29 | 92.64 | 1605.4 | 28.83 |
| 2013/3/19 | 92.16 | 92.44 | 76082.01 | 44093.19 | 3.97 | 103.43 | 92.88 | 1613   | 28.84 |
| 2013/3/20 | 92.96 | 93.21 | 76082.01 | 44093.19 | 3.96 | 103.34 | 92.46 | 1606.5 | 28.78 |
| 2013/3/21 | 92.45 | 92.46 | 76082.01 | 44093.19 | 3.94 | 102.88 | 92.45 | 1611.9 | 29.12 |
| 2013/3/22 | 93.71 | 93.41 | 76082.01 | 44093.19 | 3.93 | 102.46 | 92.02 | 1607.4 | 28.65 |
| 2013/3/25 | 94.81 | 94.55 | 76082.01 | 44093.19 | 3.87 | 102.85 | 92.17 | 1596.1 | 28.75 |
| 2013/3/26 | 96.34 | 95.99 | 76082.01 | 44093.19 | 3.98 | 102.95 | 92.05 | 1596.1 | 28.58 |
| 2013/3/27 | 96.58 | 96.53 | 76082.01 | 44093.19 | 4.07 | 103.17 | 92.35 | 1602   | 28.54 |
| 2013/3/28 | 97.23 | 97.24 | 76082.01 | 44093.19 | 4.02 | 102.74 | 91.97 | 1596   | 28.33 |
| 2013/4/1  | 97.07 | 97.1  | 76456.06 | 44550.43 | 4.02 | 102.8  | 91.09 | 1596.2 | 27.89 |
| 2013/4/2  | 97.19 | 97.23 | 76456.06 | 44550.43 | 3.97 | 103.64 | 90.91 | 1575.5 | 27.17 |
| 2013/4/3  | 94.45 | 95.02 | 76456.06 | 44550.43 | 3.9  | 103.46 | 90.86 | 1559.4 | 26.8  |
| 2013/4/4  | 93.26 | 93.26 | 76456.06 | 44550.43 | 3.95 | 102.74 | 90.1  | 1552.6 | 26.81 |
| 2013/4/5  | 92.7  | 92.76 | 76456.06 | 44550.43 | 4.13 | 102.07 | 89.57 | 1567.8 | 27.24 |
| 2013/4/8  | 93.36 | 93.36 | 76456.06 | 44550.43 | 4.08 | 102.54 | 88.84 | 1572.5 | 27.13 |
| 2013/4/9  | 94.2  | 94.18 | 76456.06 | 44550.43 | 4.02 | 102.17 | 90.47 | 1584.3 | 27.89 |
| 2013/4/10 | 94.64 | 94.59 | 76456.06 | 44550.43 | 4.09 | 102.13 | 90.58 | 1557.4 | 27.65 |
| 2013/4/11 | 93.51 | 93.44 | 76456.06 | 44550.43 | 4.14 | 101.74 | 91    | 1560   | 27.69 |
| 2013/4/12 | 91.29 | 91.23 | 76456.06 | 44550.43 | 4.22 | 102.05 | 90.57 | 1485.6 | 26.09 |
| 2013/4/15 | 88.71 | 88.75 | 76456.06 | 44550.43 | 4.14 | 102.37 | 89.75 | 1351.4 | 23.38 |
| 2013/4/16 | 88.72 | 88.73 | 76456.06 | 44550.43 | 4.16 | 101.88 | 89.49 | 1386.8 | 23.46 |
| 2013/4/17 | 86.68 | 86.65 | 76456.06 | 44550.43 | 4.21 | 102.7  | 89.88 | 1370.2 | 23.1  |
| 2013/4/18 | 87.73 | 87.83 | 76456.06 | 44550.43 | 4.4  | 102.44 | 89.06 | 1391   | 23.5  |
| 2013/4/19 | 88.01 | 88.04 | 76456.06 | 44550.43 | 4.41 | 102.79 | 89.35 | 1399.7 | 23.08 |
| 2013/4/22 | 88.76 | 88.81 | 76456.06 | 44550.43 | 4.27 | 102.39 | 89.63 | 1424   | 23.27 |
| 2013/4/23 | 89.18 | 89.21 | 76456.06 | 44550.43 | 4.24 | 102.74 | 89.22 | 1414.6 | 22.79 |
| 2013/4/24 | 91.43 | 91.07 | 76456.06 | 44550.43 | 4.17 | 102.54 | 89.43 | 1429.6 | 22.99 |
| 2013/4/25 | 93.64 | 93.27 | 76456.06 | 44550.43 | 4.17 | 101.41 | 89.9  | 1458.3 | 24.2  |
| 2013/4/26 | 93    | 92.63 | 76456.06 | 44550.43 | 4.15 | 101.31 | 89.37 | 1453   | 23.96 |
| 2013/4/29 | 94.5  | 94.09 | 76456.06 | 44550.43 | 4.39 | 101.03 | 88.71 | 1461.5 | 24.1  |
| 2013/4/30 | 93.46 | 93.22 | 76456.06 | 44550.43 | 4.34 | 100.77 | 89.17 | 1476.6 | 24.2  |
| 2013/5/1  | 91.03 | 90.74 | 76339.31 | 44289.49 | 4.33 | 100.64 | 89.17 | 1455.6 | 23.54 |
| 2013/5/2  | 93.99 | 93.7  | 76339.31 | 44289.49 | 4.03 | 100.8  | 89.17 | 1467.4 | 23.75 |
| 2013/5/3  | 95.61 | 95.25 | 76339.31 | 44289.49 | 4.04 | 100.54 | 89.17 | 1470   | 24.04 |
| 2013/5/6  | 96.16 | 95.8  | 76339.31 | 44289.49 | 4.01 | 100.75 | 88.64 | 1469.6 | 23.93 |
| 2013/5/7  | 95.62 | 95.28 | 76339.31 | 44289.49 | 3.92 | 101.14 | 88.81 | 1448.2 | 23.85 |
| 2013/5/8  | 96.62 | 96.24 | 76339.31 | 44289.49 | 3.98 | 100.75 | 89.09 | 1473.6 | 23.82 |
| 2013/5/9  | 96.39 | 96.09 | 76339.31 | 44289.49 | 3.98 | 101.35 | 89.09 | 1455   | 23.64 |
| 2013/5/10 | 96.04 | 95.81 | 76339.31 | 44289.49 | 3.91 | 101.92 | 89.09 | 1447   | 23.73 |
| 2013/5/13 | 95.17 | 94.76 | 76339.31 | 44289.49 | 3.93 | 102.32 | 88.96 | 1430.7 | 23.66 |
| 2013/5/14 | 94.21 | 93.96 | 76339.31 | 44289.49 | 4.02 | 102.88 | 89.53 | 1426.2 | 23.33 |
| 2013/5/15 | 94.3  | 93.95 | 76339.31 | 44289.49 | 4.07 | 102.84 | 89.75 | 1390.8 | 22.48 |

|           |        |        |          |          |      |        |       |        |       |
|-----------|--------|--------|----------|----------|------|--------|-------|--------|-------|
| 2013/5/16 | 95.16  | 94.85  | 76339.31 | 44289.49 | 3.93 | 102.49 | 89.72 | 1387.5 | 22.65 |
| 2013/5/17 | 96.02  | 95.72  | 76339.31 | 44289.49 | 4.06 | 103.22 | 89.66 | 1364.9 | 22.34 |
| 2013/5/20 | 96.71  | 96.29  | 76339.31 | 44289.49 | 4.09 | 102.62 | 89.99 | 1384.3 | 22.5  |
| 2013/5/21 | 96.16  | 95.55  | 76339.31 | 44289.49 | 4.19 | 103.34 | 90.22 | 1378.2 | 22.43 |
| 2013/5/22 | 94.28  | 93.98  | 76339.31 | 44289.49 | 4.19 | 104.08 | 90.63 | 1370.9 | 22.61 |
| 2013/5/23 | 94.25  | 94.12  | 76339.31 | 44289.49 | 4.26 | 103.64 | 90.58 | 1389.3 | 22.33 |
| 2013/5/24 | 94.15  | 93.84  | 76339.31 | 44289.49 | 4.24 | 103.5  | 90.67 | 1386.8 | 22.33 |
| 2013/5/28 | 95.01  | 94.65  | 76339.31 | 44289.49 | 4.17 | 104.14 | 90.52 | 1379.8 | 22.18 |
| 2013/5/29 | 93.13  | 93.13  | 76339.31 | 44289.49 | 4.15 | 103.5  | 90.34 | 1391.3 | 22.37 |
| 2013/5/30 | 93.61  | 93.57  | 76339.31 | 44289.49 | 4.02 | 102.77 | 89.51 | 1412.6 | 22.65 |
| 2013/5/31 | 91.97  | 91.93  | 76339.31 | 44289.49 | 3.98 | 103.02 | 88.18 | 1387.1 | 22.19 |
| 2013/6/3  | 93.45  | 93.41  | 76430.11 | 44014.11 | 3.99 | 101.75 | 87.21 | 1410.1 | 22.74 |
| 2013/6/4  | 93.31  | 93.36  | 76430.11 | 44014.11 | 4    | 101.78 | 87.46 | 1398.1 | 22.33 |
| 2013/6/5  | 93.74  | 93.66  | 76430.11 | 44014.11 | 4    | 101.18 | 87    | 1403.1 | 22.58 |
| 2013/6/6  | 94.76  | 94.71  | 76430.11 | 44014.11 | 3.83 | 100.01 | 85.9  | 1402.1 | 22.6  |
| 2013/6/7  | 96.03  | 96.11  | 76430.11 | 44014.11 | 3.83 | 100.22 | 84.84 | 1384   | 21.58 |
| 2013/6/10 | 95.77  | 95.82  | 76430.11 | 44014.11 | 3.8  | 100.1  | 85.02 | 1384   | 21.54 |
| 2013/6/11 | 95.38  | 95.5   | 76430.11 | 44014.11 | 3.72 | 99.63  | 84.49 | 1379   | 21.71 |
| 2013/6/12 | 95.88  | 95.98  | 76430.11 | 44014.11 | 3.78 | 99.42  | 84.49 | 1388.1 | 21.69 |
| 2013/6/13 | 96.69  | 96.66  | 76430.11 | 44014.11 | 3.81 | 99.17  | 84.11 | 1383.3 | 21.52 |
| 2013/6/14 | 97.85  | 97.83  | 76430.11 | 44014.11 | 3.73 | 99.28  | 85.48 | 1380   | 21.97 |
| 2013/6/17 | 97.77  | 97.86  | 76430.11 | 44014.11 | 3.88 | 99.17  | 85.66 | 1383.7 | 21.92 |
| 2013/6/18 | 98.44  | 98.46  | 76430.11 | 44014.11 | 3.91 | 99.68  | 85.27 | 1367.1 | 21.68 |
| 2013/6/19 | 98.24  | 98.24  | 76430.11 | 44014.11 | 3.96 | 100.65 | 84.81 | 1350   | 21.61 |
| 2013/6/20 | 95.4   | 94.89  | 76430.11 | 44014.11 | 3.88 | 100.53 | 84.31 | 1315   | 19.59 |
| 2013/6/21 | 93.69  | 93.81  | 76430.11 | 44014.11 | 3.77 | 101.1  | 84.1  | 1292.8 | 20    |
| 2013/6/24 | 95.18  | 95.07  | 76430.11 | 44014.11 | 3.74 | 101    | 84.28 | 1282   | 19.6  |
| 2013/6/25 | 95.32  | 95.25  | 76430.11 | 44014.11 | 3.65 | 101.06 | 84.36 | 1276.1 | 19.6  |
| 2013/6/26 | 95.5   | 95.47  | 76430.11 | 44014.11 | 3.71 | 101.79 | 84.02 | 1230.5 | 18.65 |
| 2013/6/27 | 97.05  | 97     | 76430.11 | 44014.11 | 3.58 | 102.17 | 84.63 | 1200.4 | 18.4  |
| 2013/6/28 | 96.56  | 96.36  | 76430.11 | 44014.11 | 3.57 | 102.5  | 85.38 | 1212.5 | 19.59 |
| 2013/7/1  | 97.99  | 97.94  | 76903.04 | 45655.78 | 3.58 | 102.4  | 84.61 | 1251.3 | 19.58 |
| 2013/7/2  | 99.6   | 99.65  | 76903.04 | 45655.78 | 3.65 | 102.82 | 84.22 | 1244.5 | 19.32 |
| 2013/7/3  | 101.24 | 101.92 | 76903.04 | 45655.78 | 3.69 | 101.98 | 84.06 | 1247.5 | 19.74 |
| 2013/7/5  | 103.22 | 103.09 | 76903.04 | 45655.78 | 3.62 | 104.62 | 84.72 | 1221.9 | 18.87 |
| 2013/7/8  | 103.14 | 103.03 | 76903.04 | 45655.78 | 3.74 | 104.25 | 85.16 | 1235.2 | 19.05 |
| 2013/7/9  | 103.53 | 103.46 | 76903.04 | 45655.78 | 3.66 | 104.81 | 85.35 | 1238.5 | 19.21 |
| 2013/7/10 | 106.52 | 106.41 | 76903.04 | 45655.78 | 3.68 | 103.43 | 86.26 | 1256   | 19.4  |
| 2013/7/11 | 104.91 | 104.77 | 76903.04 | 45655.78 | 3.61 | 102.62 | 86.06 | 1284.5 | 20.06 |
| 2013/7/12 | 105.95 | 105.85 | 76903.04 | 45655.78 | 3.64 | 103.2  | 85.47 | 1277   | 19.89 |
| 2013/7/15 | 106.32 | 106.2  | 76903.04 | 45655.78 | 3.67 | 103.2  | 85.79 | 1283.4 | 19.92 |
| 2013/7/16 | 106    | 105.88 | 76903.04 | 45655.78 | 3.68 | 102.86 | 85.93 | 1291.4 | 19.97 |
| 2013/7/17 | 106.48 | 106.39 | 76903.04 | 45655.78 | 3.63 | 102.42 | 86.32 | 1272.9 | 19.29 |
| 2013/7/18 | 108.04 | 107.94 | 76903.04 | 45655.78 | 3.81 | 102.32 | 86.05 | 1284.9 | 19.36 |
| 2013/7/19 | 108.05 | 108    | 76903.04 | 45655.78 | 3.79 | 102.11 | 85.56 | 1290.7 | 19.47 |
| 2013/7/22 | 106.91 | 106.61 | 76903.04 | 45655.78 | 3.68 | 101.46 | 85.54 | 1332.2 | 20.51 |
| 2013/7/23 | 107.23 | 107.13 | 76903.04 | 45655.78 | 3.74 | 101.36 | 85.08 | 1342.3 | 20.42 |
| 2013/7/24 | 105.39 | 105.41 | 76903.04 | 45655.78 | 3.7  | 101.74 | 84.93 | 1318.6 | 19.99 |
| 2013/7/25 | 105.49 | 105.47 | 76903.04 | 45655.78 | 3.64 | 101.29 | 84.6  | 1336.8 | 20.14 |
| 2013/7/26 | 104.7  | 104.76 | 76903.04 | 45655.78 | 3.56 | 101.28 | 84.21 | 1324.7 | 19.9  |
| 2013/7/29 | 104.55 | 104.61 | 76903.04 | 45655.78 | 3.46 | 101.58 | 83.7  | 1328.4 | 19.87 |
| 2013/7/30 | 103.08 | 103.14 | 76903.04 | 45655.78 | 3.43 | 102.26 | 83.75 | 1325.8 | 19.7  |
| 2013/7/31 | 105.03 | 105.1  | 76903.04 | 45655.78 | 3.45 | 102.52 | 84.34 | 1324.2 | 19.88 |
| 2013/8/1  | 107.89 | 107.93 | 76707.09 | 44148.22 | 3.39 | 103.36 | 84.85 | 1308.5 | 19.61 |

|            |        |        |          |          |      |        |       |        |       |
|------------|--------|--------|----------|----------|------|--------|-------|--------|-------|
| 2013/8/2   | 106.94 | 106.94 | 76707.09 | 44148.22 | 3.35 | 102.22 | 84.63 | 1316   | 19.61 |
| 2013/8/5   | 106.56 | 106.61 | 76707.09 | 44148.22 | 3.32 | 101.77 | 84.2  | 1303.1 | 19.77 |
| 2013/8/6   | 105.3  | 105.32 | 76707.09 | 44148.22 | 3.32 | 101.81 | 83.85 | 1282.4 | 19.53 |
| 2013/8/7   | 104.37 | 104.41 | 76707.09 | 44148.22 | 3.25 | 100.88 | 83.88 | 1287.1 | 19.5  |
| 2013/8/8   | 103.4  | 103.45 | 76707.09 | 44148.22 | 3.3  | 100.57 | 83.05 | 1312.8 | 20.22 |
| 2013/8/9   | 105.97 | 106.04 | 76707.09 | 44148.22 | 3.23 | 100.79 | 83    | 1314.6 | 20.3  |
| 2013/8/12  | 106.11 | 106.19 | 76707.09 | 44148.22 | 3.31 | 101.09 | 83.25 | 1336.5 | 21.38 |
| 2013/8/13  | 106.83 | 106.78 | 76707.09 | 44148.22 | 3.29 | 101.15 | 82.95 | 1321   | 21.65 |
| 2013/8/14  | 106.85 | 106.89 | 76707.09 | 44148.22 | 3.34 | 100.8  | 82.77 | 1336.3 | 21.75 |
| 2013/8/15  | 107.33 | 107.43 | 76707.09 | 44148.22 | 3.42 | 99.88  | 82.71 | 1364.2 | 22.99 |
| 2013/8/16  | 107.46 | 107.58 | 76707.09 | 44148.22 | 3.37 | 100.09 | 82.28 | 1376.7 | 23.21 |
| 2013/8/19  | 107.1  | 107.14 | 76707.09 | 44148.22 | 3.46 | 99.86  | 82.37 | 1366.2 | 23.16 |
| 2013/8/20  | 104.96 | 104.9  | 76707.09 | 44148.22 | 3.44 | 99.75  | 82.14 | 1372   | 23.07 |
| 2013/8/21  | 103.85 | 103.93 | 76707.09 | 44148.22 | 3.46 | 99.8   | 82.07 | 1366.8 | 23.27 |
| 2013/8/22  | 105.03 | 104.93 | 76707.09 | 44148.22 | 3.55 | 100.26 | 81.86 | 1372.3 | 23.04 |
| 2013/8/23  | 106.42 | 106.48 | 76707.09 | 44148.22 | 3.49 | 100.36 | 82.2  | 1396.6 | 23.76 |
| 2013/8/26  | 105.92 | 105.88 | 76707.09 | 44148.22 | 3.51 | 100.31 | 82.61 | 1403   | 23.96 |
| 2013/8/27  | 109.01 | 109.11 | 76707.09 | 44148.22 | 3.53 | 100.53 | 82.4  | 1415.3 | 24.64 |
| 2013/8/28  | 110.1  | 110.17 | 76707.09 | 44148.22 | 3.57 | 100.65 | 82.34 | 1423.7 | 24.93 |
| 2013/8/29  | 108.8  | 108.51 | 76707.09 | 44148.22 | 3.62 | 100.8  | 82.33 | 1407.3 | 23.85 |
| 2013/8/30  | 107.65 | 107.98 | 76707.09 | 44148.22 | 3.58 | 100.8  | 82.14 | 1393.8 | 23.44 |
| 2013/9/3   | 108.54 | 108.67 | 76179.49 | 45357.86 | 3.67 | 100.73 | 81.82 | 1412   | 24.26 |
| 2013/9/4   | 107.23 | 107.29 | 76179.49 | 45357.86 | 3.68 | 100.3  | 81.44 | 1387.1 | 23.48 |
| 2013/9/5   | 108.37 | 108.5  | 76179.49 | 45357.86 | 3.58 | 100.53 | 81.51 | 1367.6 | 23.21 |
| 2013/9/6   | 110.53 | 110.62 | 76179.49 | 45357.86 | 3.53 | 100.25 | 81.48 | 1387.5 | 23.82 |
| 2013/9/9   | 109.52 | 109.62 | 76179.49 | 45357.86 | 3.61 | 99.86  | 81.44 | 1387   | 23.67 |
| 2013/9/10  | 107.39 | 107.48 | 76179.49 | 45357.86 | 3.58 | 99.63  | 81.84 | 1365.8 | 22.97 |
| 2013/9/11  | 107.56 | 107.65 | 76179.49 | 45357.86 | 3.57 | 99.05  | 81.89 | 1361.6 | 23.11 |
| 2013/9/12  | 108.6  | 108.72 | 76179.49 | 45357.86 | 3.64 | 99.14  | 82.23 | 1322.9 | 21.87 |
| 2013/9/13  | 108.21 | 108.31 | 76179.49 | 45357.86 | 3.68 | 98.74  | 82.06 | 1312.3 | 22.15 |
| 2013/9/16  | 106.59 | 106.54 | 76179.49 | 45357.86 | 3.74 | 98.58  | 82.46 | 1312   | 21.9  |
| 2013/9/17  | 105.42 | 105.36 | 76179.49 | 45357.86 | 3.75 | 98.52  | 82.54 | 1310.2 | 21.71 |
| 2013/9/18  | 108.07 | 108.23 | 76179.49 | 45357.86 | 3.71 | 97.12  | 82.72 | 1341   | 22.94 |
| 2013/9/19  | 106.39 | 106.26 | 76179.49 | 45357.86 | 3.72 | 97.76  | 83.36 | 1368.3 | 23.14 |
| 2013/9/20  | 104.67 | 104.7  | 76179.49 | 45357.86 | 3.69 | 97.91  | 83.32 | 1330.7 | 21.77 |
| 2013/9/23  | 103.59 | 103.62 | 76179.49 | 45357.86 | 3.6  | 97.7   | 82.98 | 1322.4 | 21.55 |
| 2013/9/24  | 103.13 | 103.22 | 76179.49 | 45357.86 | 3.49 | 97.94  | 83.28 | 1324.9 | 21.78 |
| 2013/9/25  | 102.66 | 102.68 | 76179.49 | 45357.86 | 3.49 | 97.47  | 83.15 | 1324.9 | 21.84 |
| 2013/9/26  | 103.03 | 103.1  | 76179.49 | 45357.86 | 3.5  | 97.71  | 82.01 | 1338.3 | 21.72 |
| 2013/9/27  | 102.87 | 102.86 | 76179.49 | 45357.86 | 3.59 | 97.11  | 81.64 | 1336   | 21.82 |
| 2013/9/30  | 102.33 | 102.36 | 76179.49 | 45357.86 | 3.56 | 96.83  | 80.54 | 1328.4 | 21.65 |
| 2013/10/1  | 102.04 | 102.09 | 76441.02 | 44257.05 | 3.61 | 97.03  | 80.46 | 1287.5 | 21.15 |
| 2013/10/2  | 104.1  | 104.15 | 76441.02 | 44257.05 | 3.54 | 96.83  | 80.74 | 1316.4 | 21.85 |
| 2013/10/3  | 103.31 | 103.29 | 76441.02 | 44257.05 | 3.5  | 97.24  | 81.08 | 1316.4 | 21.74 |
| 2013/10/4  | 103.84 | 103.83 | 76441.02 | 44257.05 | 3.51 | 98.12  | 81.52 | 1309.8 | 21.8  |
| 2013/10/7  | 103.03 | 103.07 | 76441.02 | 44257.05 | 3.63 | 97.65  | 81.5  | 1322.3 | 21.92 |
| 2013/10/8  | 103.49 | 103.54 | 76441.02 | 44257.05 | 3.72 | 97.69  | 81.32 | 1321.5 | 22.37 |
| 2013/10/9  | 101.61 | 101.63 | 76441.02 | 44257.05 | 3.68 | 98.5   | 81.33 | 1306   | 21.9  |
| 2013/10/10 | 103.01 | 103.08 | 76441.02 | 44257.05 | 3.72 | 98.38  | 81.91 | 1285   | 21.82 |
| 2013/10/11 | 102.02 | 102.17 | 76441.02 | 44257.05 | 3.78 | 98.49  | 81.98 | 1269.9 | 21.2  |
| 2013/10/14 | 102.41 | 102.46 | 76441.02 | 44257.05 | 3.82 | 98.31  | 81.92 | 1272.1 | 21.55 |
| 2013/10/15 | 101.21 | 101.15 | 76441.02 | 44257.05 | 3.79 | 98.23  | 81.88 | 1280.9 | 21.18 |
| 2013/10/16 | 102.29 | 102.34 | 76441.02 | 44257.05 | 3.77 | 98.47  | 81.85 | 1281   | 21.32 |
| 2013/10/17 | 100.67 | 100.72 | 76441.02 | 44257.05 | 3.76 | 97.21  | 82.17 | 1319.9 | 21.82 |

|            |        |        |          |          |      |       |       |        |       |
|------------|--------|--------|----------|----------|------|-------|-------|--------|-------|
| 2013/10/18 | 100.81 | 100.87 | 76441.02 | 44257.05 | 3.76 | 97.14 | 81.91 | 1313.3 | 21.87 |
| 2013/10/21 | 99.22  | 99.28  | 76441.02 | 44257.05 | 3.67 | 97.32 | 81.84 | 1316.5 | 22.19 |
| 2013/10/22 | 97.8   | 97.63  | 76441.02 | 44257.05 | 3.58 | 96.8  | 81.98 | 1341.2 | 22.48 |
| 2013/10/23 | 96.86  | 96.9   | 76441.02 | 44257.05 | 3.62 | 97.2  | 82.37 | 1331.9 | 22.55 |
| 2013/10/24 | 97.11  | 96.65  | 76441.02 | 44257.05 | 3.63 | 96.98 | 82.47 | 1346.6 | 22.75 |
| 2013/10/25 | 97.85  | 97.4   | 76441.02 | 44257.05 | 3.71 | 97.18 | 82.26 | 1351.8 | 22.42 |
| 2013/10/28 | 98.68  | 98.74  | 76441.02 | 44257.05 | 3.57 | 97.35 | 82.05 | 1353.6 | 22.46 |
| 2013/10/29 | 98.2   | 98.29  | 76441.02 | 44257.05 | 3.5  | 97.92 | 82.07 | 1359.7 | 22.4  |
| 2013/10/30 | 96.77  | 96.81  | 76441.02 | 44257.05 | 3.62 | 97.96 | 82.04 | 1342.3 | 22.98 |
| 2013/10/31 | 96.38  | 96.29  | 76441.02 | 44257.05 | 3.58 | 97.96 | 81.8  | 1323.9 | 21.99 |
| 2013/11/1  | 94.61  | 94.56  | 76753.77 | 45971.96 | 3.51 | 99.04 | 81.5  | 1311.8 | 21.84 |
| 2013/11/4  | 94.62  | 94.58  | 76753.77 | 45971.96 | 3.45 | 98.7  | 81.5  | 1312.9 | 21.6  |
| 2013/11/5  | 93.37  | 93.4   | 76753.77 | 45971.96 | 3.47 | 98.24 | 81.38 | 1308.6 | 21.67 |
| 2013/11/6  | 94.8   | 94.74  | 76753.77 | 45971.96 | 3.5  | 98.02 | 80.61 | 1316.3 | 21.78 |
| 2013/11/7  | 94.2   | 94.25  | 76753.77 | 45971.96 | 3.52 | 97.92 | 80.7  | 1306.3 | 21.59 |
| 2013/11/8  | 94.6   | 94.56  | 76753.77 | 45971.96 | 3.56 | 98.4  | 80.22 | 1306.3 | 21.31 |
| 2013/11/11 | 95.14  | 95.13  | 76753.77 | 45971.96 | 3.57 | 98.59 | 80.41 | 1281.8 | 21.27 |
| 2013/11/12 | 93.04  | 93.12  | 76753.77 | 45971.96 | 3.62 | 99.08 | 80.23 | 1282.3 | 20.65 |
| 2013/11/13 | 93.88  | 93.91  | 76753.77 | 45971.96 | 3.57 | 98.15 | 80.57 | 1280.5 | 20.48 |
| 2013/11/14 | 93.76  | 93.76  | 76753.77 | 45971.96 | 3.61 | 98.1  | 80.22 | 1289.6 | 20.75 |
| 2013/11/15 | 93.84  | 93.8   | 76753.77 | 45971.96 | 3.66 | 97.79 | 79.96 | 1288   | 20.72 |
| 2013/11/18 | 93.03  | 93.03  | 76753.77 | 45971.96 | 3.62 | 97.83 | 79.99 | 1272.3 | 20.4  |
| 2013/11/19 | 93.34  | 93.35  | 76753.77 | 45971.96 | 3.56 | 97.76 | 80.03 | 1273   | 20.32 |
| 2013/11/20 | 93.33  | 93.34  | 76753.77 | 45971.96 | 3.67 | 97.84 | 79.61 | 1241.9 | 20.14 |
| 2013/11/21 | 95.44  | 95.35  | 76753.77 | 45971.96 | 3.7  | 97.28 | 79.14 | 1240.4 | 19.93 |
| 2013/11/22 | 94.84  | 94.53  | 76753.77 | 45971.96 | 3.77 | 97.14 | 78.87 | 1243.5 | 19.86 |
| 2013/11/25 | 94.09  | 93.86  | 76753.77 | 45971.96 | 3.79 | 97.55 | 79.09 | 1240.7 | 19.88 |
| 2013/11/26 | 93.68  | 93.41  | 76753.77 | 45971.96 | 3.82 | 97.19 | 78.83 | 1243   | 19.93 |
| 2013/11/27 | 92.3   | 92.05  | 76753.77 | 45971.96 | 3.9  | 96.76 | 78.53 | 1237.2 | 19.59 |
| 2013/11/29 | 92.72  | 92.55  | 76753.77 | 45971.96 | 3.95 | 96.27 | 77.48 | 1251.6 | 19.98 |
| 2013/12/2  | 93.82  | 93.61  | 77152.64 | 46019.96 | 3.99 | 96.75 | 77.2  | 1237.9 | 19.23 |
| 2013/12/3  | 96.04  | 95.83  | 77152.64 | 46019.96 | 3.98 | 96.54 | 77.07 | 1237.9 | 19.1  |
| 2013/12/4  | 97.2   | 96.97  | 77152.64 | 46019.96 | 3.96 | 96.59 | 77.04 | 1244.7 | 19.66 |
| 2013/12/5  | 97.38  | 97.14  | 77152.64 | 46019.96 | 4.13 | 96.87 | 77.3  | 1227.2 | 19.32 |
| 2013/12/6  | 97.65  | 97.48  | 77152.64 | 46019.96 | 4.11 | 96.81 | 78.08 | 1230.9 | 19.4  |
| 2013/12/9  | 97.34  | 97.1   | 77152.64 | 46019.96 | 4.23 | 96.33 | 78.3  | 1243.2 | 19.89 |
| 2013/12/10 | 98.51  | 98.32  | 77152.64 | 46019.96 | 4.24 | 96.23 | 77.84 | 1264.4 | 20.3  |
| 2013/12/11 | 97.44  | 97.25  | 77152.64 | 46019.96 | 4.34 | 96.63 | 78.05 | 1253.8 | 20.23 |
| 2013/12/12 | 97.5   | 97.21  | 77152.64 | 46019.96 | 4.41 | 96.78 | 78.32 | 1225.9 | 19.45 |
| 2013/12/13 | 96.6   | 96.27  | 77152.64 | 46019.96 | 4.35 | 97.11 | 78.18 | 1239   | 19.63 |
| 2013/12/16 | 97.48  | 97.18  | 77152.64 | 46019.96 | 4.28 | 97.08 | 78.29 | 1239   | 20.05 |
| 2013/12/17 | 97.22  | 96.99  | 77152.64 | 46019.96 | 4.29 | 97.31 | 78.26 | 1232.3 | 19.8  |
| 2013/12/18 | 97.8   | 97.59  | 77152.64 | 46019.96 | 4.25 | 96.55 | 78.23 | 1220.3 | 19.74 |
| 2013/12/19 | 98.77  | 98.4   | 77152.64 | 46019.96 | 4.46 | 96.63 | 77.81 | 1189.9 | 19.47 |
| 2013/12/20 | 99.32  | 99.11  | 77152.64 | 46019.96 | 4.42 | 96.87 | 77.93 | 1203.7 | 19.35 |
| 2013/12/23 | 98.91  | 98.62  | 77152.64 | 46019.96 | 4.46 | 96.76 | 77.92 | 1200   | 19.39 |
| 2013/12/24 | 99.22  | 98.87  | 77152.64 | 46019.96 | 4.42 | 96.73 | 78.7  | 1205.5 | 19.41 |
| 2013/12/26 | 99.55  | 99.18  | 77152.64 | 46019.96 | 4.43 | 96.43 | 78.48 | 1212.9 | 19.93 |
| 2013/12/27 | 100.32 | 99.94  | 77152.64 | 46019.96 | 4.41 | 96.04 | 78.12 | 1214   | 19.98 |
| 2013/12/30 | 99.29  | 98.9   | 77152.64 | 46019.96 | 4.43 | 95.93 | 77.81 | 1194.4 | 19.61 |
| 2013/12/31 | 98.42  | 98.17  | 77152.64 | 46019.96 | 4.23 | 95.56 | 77.04 | 1198.6 | 18.94 |
| 2014/1/2   | 95.44  | 95.14  | 77490.82 | 46100.21 | 4.32 | 95.28 | 77.04 | 1224.6 | 20.02 |
| 2014/1/3   | 93.96  | 93.66  | 77490.82 | 46100.21 | 4.3  | 95.47 | 77.04 | 1236.2 | 20.09 |
| 2014/1/6   | 93.43  | 93.12  | 77490.82 | 46100.21 | 4.31 | 95.54 | 77.04 | 1237.9 | 20.09 |

|           |        |        |          |          |      |       |       |        |       |
|-----------|--------|--------|----------|----------|------|-------|-------|--------|-------|
| 2014/1/7  | 93.67  | 93.31  | 77490.82 | 46100.21 | 4.3  | 95.54 | 77.04 | 1229.3 | 19.85 |
| 2014/1/8  | 92.33  | 91.9   | 77490.82 | 46100.21 | 4.22 | 95.28 | 77.04 | 1222.3 | 19.37 |
| 2014/1/9  | 91.66  | 91.36  | 77490.82 | 46100.21 | 4.01 | 95.1  | 76    | 1226.3 | 19.54 |
| 2014/1/10 | 92.72  | 92.39  | 77490.82 | 46100.21 | 4.05 | 95.09 | 75.83 | 1242.8 | 20.08 |
| 2014/1/13 | 91.8   | 91.45  | 77490.82 | 46100.21 | 4.27 | 95.62 | 75.95 | 1242.8 | 20.36 |
| 2014/1/14 | 92.59  | 92.15  | 77490.82 | 46100.21 | 4.37 | 95.33 | 76.25 | 1242.4 | 20.2  |
| 2014/1/15 | 94.17  | 93.78  | 77490.82 | 46100.21 | 4.33 | 95.72 | 75.83 | 1238.9 | 20.16 |
| 2014/1/16 | 93.96  | 93.54  | 77490.82 | 46100.21 | 4.38 | 95.82 | 75.99 | 1241.1 | 20.04 |
| 2014/1/17 | 94.37  | 93.96  | 77490.82 | 46100.21 | 4.33 | 95.46 | 75.96 | 1252.8 | 20.29 |
| 2014/1/21 | 94.99  | 94.51  | 77490.82 | 46100.21 | 4.43 | 95.1  | 74.61 | 1240.1 | 19.83 |
| 2014/1/22 | 96.73  | 96.35  | 77490.82 | 46100.21 | 4.69 | 94.56 | 74.36 | 1240.3 | 19.81 |
| 2014/1/23 | 97.32  | 97.23  | 77490.82 | 46100.21 | 4.73 | 94.19 | 73.59 | 1261.8 | 20    |
| 2014/1/24 | 96.64  | 96.66  | 77490.82 | 46100.21 | 5.18 | 95.05 | 72.83 | 1269.4 | 20.11 |
| 2014/1/27 | 95.72  | 95.82  | 77490.82 | 46100.21 | 4.85 | 94.5  | 72.38 | 1269.4 | 19.56 |
| 2014/1/28 | 97.41  | 97.49  | 77490.82 | 46100.21 | 5.03 | 94.54 | 72.16 | 1258.3 | 19.76 |
| 2014/1/29 | 97.36  | 97.34  | 77490.82 | 46100.21 | 5.56 | 94.6  | 72.39 | 1258.3 | 19.53 |
| 2014/1/30 | 98.23  | 98.25  | 77490.82 | 46100.21 | 5.01 | 95.06 | 71.19 | 1242.5 | 19.14 |
| 2014/1/31 | 97.49  | 97.55  | 77490.82 | 46100.21 | 4.94 | 95.34 | 71.44 | 1244.2 | 19.15 |
| 2014/2/3  | 96.43  | 96.44  | 77972.15 | 46083.31 | 4.91 | 96.22 | 71.56 | 1258.3 | 19.39 |
| 2014/2/4  | 97.19  | 97.24  | 77972.15 | 46083.31 | 5.38 | 96.13 | 71.72 | 1255.4 | 19.4  |
| 2014/2/5  | 97.38  | 97.4   | 77972.15 | 46083.31 | 5.03 | 96.22 | 72.6  | 1255.4 | 19.79 |
| 2014/2/6  | 97.84  | 97.84  | 77972.15 | 46083.31 | 4.93 | 96.15 | 73.11 | 1257.9 | 19.91 |
| 2014/2/7  | 99.88  | 99.98  | 77972.15 | 46083.31 | 4.78 | 95.65 | 73.24 | 1267.3 | 19.92 |
| 2014/2/10 | 100.06 | 100.12 | 77972.15 | 46083.31 | 4.58 | 95.67 | 72.62 | 1274.5 | 20.1  |
| 2014/2/11 | 99.94  | 99.96  | 77972.15 | 46083.31 | 4.82 | 95.39 | 72.52 | 1291.5 | 20.17 |
| 2014/2/12 | 100.37 | 100.38 | 77972.15 | 46083.31 | 4.82 | 94.55 | 72.47 | 1291.1 | 20.25 |
| 2014/2/13 | 100.35 | 100.27 | 77972.15 | 46083.31 | 5.22 | 94.2  | 71.53 | 1302.8 | 20.39 |
| 2014/2/14 | 100.3  | 100.31 | 77972.15 | 46083.31 | 5.21 | 93.7  | 70.51 | 1318.3 | 21.43 |
| 2014/2/18 | 102.43 | 102.54 | 77972.15 | 46083.31 | 5.55 | 94.07 | 70.24 | 1322.4 | 21.88 |
| 2014/2/19 | 103.31 | 103.46 | 77972.15 | 46083.31 | 6.15 | 94.08 | 69.71 | 1311.7 | 21.7  |
| 2014/2/20 | 102.92 | 103.2  | 77972.15 | 46083.31 | 6.06 | 94.23 | 69.38 | 1323.5 | 21.68 |
| 2014/2/21 | 102.2  | 102.53 | 77972.15 | 46083.31 | 6.14 | 94.43 | 69.68 | 1325   | 21.78 |
| 2014/2/24 | 102.82 | 103.17 | 77972.15 | 46083.31 | 5.45 | 94.24 | 70.04 | 1337.6 | 22.05 |
| 2014/2/25 | 101.83 | 102.2  | 77972.15 | 46083.31 | 5.1  | 94.07 | 69.85 | 1399   | 21.96 |
| 2014/2/26 | 102.59 | 102.93 | 77972.15 | 46083.31 | 4.86 | 94.12 | 69.37 | 1325.6 | 21.25 |
| 2014/2/27 | 102.4  | 102.68 | 77972.15 | 46083.31 | 4.51 | 94.04 | 68.88 | 1330.9 | 21.25 |
| 2014/2/28 | 102.59 | 102.88 | 77972.15 | 46083.31 | 4.61 | 93.73 | 67.93 | 1326.2 | 21.22 |
| 2014/3/3  | 104.92 | 105.34 | 77399.43 | 44389.76 | 4.49 | 93.75 | 67.43 | 1352.4 | 21.4  |
| 2014/3/4  | 103.33 | 103.64 | 77399.43 | 44389.76 | 4.67 | 93.75 | 67.77 | 1338.4 | 21.19 |
| 2014/3/5  | 101.45 | 101.75 | 77399.43 | 44389.76 | 4.52 | 93.44 | 68.24 | 1338.9 | 21.18 |
| 2014/3/6  | 101.56 | 101.82 | 77399.43 | 44389.76 | 4.66 | 93.33 | 68.03 | 1351.6 | 21.46 |
| 2014/3/7  | 102.58 | 102.82 | 77399.43 | 44389.76 | 4.62 | 93.47 | 67.7  | 1337.7 | 20.87 |
| 2014/3/10 | 101.12 | 101.39 | 77399.43 | 44389.76 | 4.65 | 93.86 | 67.7  | 1340.4 | 20.8  |
| 2014/3/11 | 100.03 | 100.29 | 77399.43 | 44389.76 | 4.61 | 94.02 | 67.81 | 1347.6 | 20.8  |
| 2014/3/12 | 97.99  | 98.29  | 77399.43 | 44389.76 | 4.49 | 94.01 | 67.68 | 1366.8 | 21.29 |
| 2014/3/13 | 98.2   | 98.57  | 77399.43 | 44389.76 | 4.38 | 93.97 | 67.56 | 1371.9 | 21.17 |
| 2014/3/14 | 98.89  | 99.23  | 77399.43 | 44389.76 | 4.43 | 93.86 | 67.51 | 1382.3 | 21.34 |
| 2014/3/17 | 98.08  | 98.43  | 77399.43 | 44389.76 | 4.54 | 93.93 | 67.36 | 1372.2 | 21.39 |
| 2014/3/18 | 99.7   | 100.08 | 77399.43 | 44389.76 | 4.46 | 94.16 | 67.7  | 1353.4 | 20.71 |
| 2014/3/19 | 100.37 | 100.71 | 77399.43 | 44389.76 | 4.48 | 94.5  | 68.35 | 1332.7 | 20.5  |
| 2014/3/20 | 99.43  | 99.68  | 77399.43 | 44389.76 | 4.37 | 94.63 | 68.77 | 1326   | 20.29 |
| 2014/3/21 | 99.46  | 99.97  | 77399.43 | 44389.76 | 4.31 | 94.78 | 68.42 | 1335.8 | 20.31 |
| 2014/3/24 | 99.6   | 100.05 | 77399.43 | 44389.76 | 4.28 | 94.7  | 68.89 | 1311.7 | 19.97 |
| 2014/3/25 | 99.19  | 99.66  | 77399.43 | 44389.76 | 4.41 | 94.7  | 69.29 | 1311.1 | 20.06 |



|           |        |        |          |          |      |       |       |        |       |
|-----------|--------|--------|----------|----------|------|-------|-------|--------|-------|
| 2014/3/26 | 100.26 | 100.61 | 77399.43 | 44389.76 | 4.4  | 94.23 | 70.16 | 1311.8 | 19.8  |
| 2014/3/27 | 101.28 | 101.25 | 77399.43 | 44389.76 | 4.58 | 94.07 | 69.66 | 1311.8 | 19.69 |
| 2014/3/28 | 101.67 | 101.73 | 77399.43 | 44389.76 | 4.49 | 93.9  | 69.24 | 1294.4 | 19.76 |
| 2014/3/31 | 101.58 | 101.57 | 77399.43 | 44389.76 | 4.37 | 93.74 | 68.97 | 1283.4 | 19.73 |
| 2014/4/1  | 99.74  | 99.69  | 77210.81 | 45179.41 | 4.28 | 94.01 | 70.03 | 1279   | 19.67 |
| 2014/4/2  | 99.62  | 99.6   | 77210.81 | 45179.41 | 4.36 | 94.04 | 69.7  | 1290   | 20.03 |
| 2014/4/3  | 100.29 | 100.29 | 77210.81 | 45179.41 | 4.47 | 94.22 | 69.09 | 1286.6 | 19.79 |
| 2014/4/4  | 101.14 | 101.16 | 77210.81 | 45179.41 | 4.44 | 94.33 | 69.42 | 1302   | 19.94 |
| 2014/4/7  | 100.44 | 100.43 | 77210.81 | 45179.41 | 4.48 | 94.14 | 69.55 | 1296.8 | 19.96 |
| 2014/4/8  | 102.56 | 102.57 | 77210.81 | 45179.41 | 4.53 | 93.36 | 69.1  | 1308.3 | 20.05 |
| 2014/4/9  | 103.6  | 103.55 | 77210.81 | 45179.41 | 4.59 | 93.11 | 68.29 | 1310.8 | 19.77 |
| 2014/4/10 | 103.4  | 103.37 | 77210.81 | 45179.41 | 4.66 | 93.14 | 68.5  | 1318.3 | 20.15 |
| 2014/4/11 | 103.74 | 103.68 | 77210.81 | 45179.41 | 4.62 | 93.45 | 68.37 | 1318.1 | 20.01 |
| 2014/4/14 | 104.05 | 104.05 | 77210.81 | 45179.41 | 4.56 | 93.49 | 67.86 | 1325.7 | 19.96 |
| 2014/4/15 | 103.75 | 103.7  | 77210.81 | 45179.41 | 4.57 | 93.47 | 68.07 | 1302.9 | 19.48 |
| 2014/4/16 | 103.76 | 103.71 | 77210.81 | 45179.41 | 4.53 | 93.07 | 67.65 | 1302.2 | 19.6  |
| 2014/4/17 | 104.3  | 104.33 | 77210.81 | 45179.41 | 4.74 | 93.1  | 67.6  | 1293.8 | 19.6  |
| 2014/4/21 | 104.37 | 104.35 | 77210.81 | 45179.41 | 4.7  | 93.09 | 68.15 | 1289.8 | 19.6  |
| 2014/4/22 | 102.13 | 101.69 | 77210.81 | 45179.41 | 4.74 | 92.93 | 68.14 | 1282.3 | 19.4  |
| 2014/4/23 | 101.44 | 101.47 | 77210.81 | 45179.41 | 4.73 | 93.17 | 68.2  | 1284   | 19.4  |
| 2014/4/24 | 101.94 | 102.2  | 77210.81 | 45179.41 | 4.71 | 93.05 | 68.18 | 1291.3 | 19.62 |
| 2014/4/25 | 100.6  | 100.85 | 77210.81 | 45179.41 | 4.65 | 93.08 | 67.7  | 1300.5 | 19.76 |
| 2014/4/28 | 100.84 | 101.13 | 77210.81 | 45179.41 | 4.8  | 93.01 | 67.33 | 1299.1 | 19.76 |
| 2014/4/29 | 101.28 | 101.56 | 77210.81 | 45179.41 | 4.83 | 92.92 | 67.98 | 1294.8 | 19.41 |
| 2014/4/30 | 99.74  | 100.07 | 77210.81 | 45179.41 | 4.82 | 92.65 | 67.38 | 1292.3 | 19.14 |
| 2014/5/1  | 99.42  | 99.69  | 77349.99 | 43907.3  | 4.72 | 92.16 | 67.38 | 1285.2 | 19.02 |
| 2014/5/2  | 99.76  | 100.09 | 77349.99 | 43907.3  | 4.67 | 92.24 | 67.38 | 1297.9 | 19.43 |
| 2014/5/5  | 99.48  | 99.74  | 77349.99 | 43907.3  | 4.69 | 92.27 | 66.93 | 1309.8 | 19.56 |
| 2014/5/6  | 99.5   | 99.81  | 77349.99 | 43907.3  | 4.8  | 91.7  | 67.05 | 1308.4 | 19.6  |
| 2014/5/7  | 100.77 | 101.06 | 77349.99 | 43907.3  | 4.74 | 91.8  | 67.13 | 1289.8 | 19.3  |
| 2014/5/8  | 100.26 | 100.52 | 77349.99 | 43907.3  | 4.57 | 91.93 | 68.09 | 1289.6 | 19.18 |
| 2014/5/9  | 99.99  | 100.32 | 77349.99 | 43907.3  | 4.53 | 92.39 | 68.09 | 1289.6 | 19.11 |
| 2014/5/12 | 100.59 | 100.89 | 77349.99 | 43907.3  | 4.43 | 92.27 | 68.12 | 1295.9 | 19.5  |
| 2014/5/13 | 101.7  | 102.01 | 77349.99 | 43907.3  | 4.36 | 92.49 | 68.77 | 1293.3 | 19.53 |
| 2014/5/14 | 102.37 | 102.63 | 77349.99 | 43907.3  | 4.37 | 92.83 | 69.1  | 1306.9 | 19.74 |
| 2014/5/15 | 101.5  | 101.74 | 77349.99 | 43907.3  | 4.47 | 92.7  | 69.63 | 1296.6 | 19.47 |
| 2014/5/16 | 102.02 | 102.31 | 77349.99 | 43907.3  | 4.41 | 92.56 | 69.25 | 1296.6 | 19.31 |
| 2014/5/19 | 102.61 | 102.95 | 77349.99 | 43907.3  | 4.47 | 92.57 | 69.23 | 1296.6 | 19.36 |
| 2014/5/20 | 102.44 | 102.8  | 77349.99 | 43907.3  | 4.55 | 92.44 | 69.54 | 1290.1 | 19.37 |
| 2014/5/21 | 104.07 | 104.31 | 77349.99 | 43907.3  | 4.47 | 92.11 | 69.58 | 1287.4 | 19.3  |
| 2014/5/22 | 103.74 | 104.03 | 77349.99 | 43907.3  | 4.36 | 92.28 | 69.87 | 1294.9 | 19.57 |
| 2014/5/23 | 104.35 | 105.01 | 77349.99 | 43907.3  | 4.41 | 92.47 | 69.9  | 1293.4 | 19.37 |
| 2014/5/27 | 104.11 | 104.78 | 77349.99 | 43907.3  | 4.51 | 92.59 | 69.99 | 1277.4 | 19.08 |
| 2014/5/28 | 102.72 | 103.37 | 77349.99 | 43907.3  | 4.62 | 93.13 | 69.97 | 1277.4 | 19.08 |
| 2014/5/29 | 103.58 | 104.26 | 77349.99 | 43907.3  | 4.56 | 93.1  | 69.93 | 1254.6 | 19.01 |
| 2014/5/30 | 102.71 | 103.4  | 77349.99 | 43907.3  | 4.54 | 92.95 | 69.58 | 1250.5 | 18.75 |
| 2014/6/2  | 102.47 | 103.07 | 77702.37 | 44078.73 | 4.61 | 92.95 | 68.94 | 1242.9 | 18.68 |
| 2014/6/3  | 102.66 | 103.34 | 77702.37 | 44078.73 | 4.63 | 92.94 | 68.7  | 1244.7 | 18.77 |
| 2014/6/4  | 102.64 | 103.27 | 77702.37 | 44078.73 | 4.64 | 93.01 | 68.61 | 1243.3 | 18.77 |
| 2014/6/5  | 102.48 | 103.17 | 77702.37 | 44078.73 | 4.7  | 92.58 | 68.93 | 1253.5 | 19.05 |
| 2014/6/6  | 102.66 | 103.32 | 77702.37 | 44078.73 | 4.71 | 92.68 | 69.18 | 1252.5 | 18.96 |
| 2014/6/9  | 104.41 | 105.09 | 77702.37 | 44078.73 | 4.65 | 92.64 | 69.78 | 1256   | 19.05 |
| 2014/6/10 | 104.35 | 105.02 | 77702.37 | 44078.73 | 4.53 | 92.91 | 69.78 | 1261.2 | 19.05 |
| 2014/6/11 | 104.4  | 105.04 | 77702.37 | 44078.73 | 4.51 | 92.71 | 70.01 | 1260.1 | 19.05 |

|           |        |        |          |          |      |       |       |        |       |
|-----------|--------|--------|----------|----------|------|-------|-------|--------|-------|
| 2014/6/12 | 106.53 | 107.2  | 77702.37 | 44078.73 | 4.76 | 91.96 | 70.01 | 1272.7 | 19.05 |
| 2014/6/13 | 106.91 | 107.49 | 77702.37 | 44078.73 | 4.74 | 91.77 | 70.01 | 1274.7 | 19.54 |
| 2014/6/16 | 106.9  | 107.52 | 77702.37 | 44078.73 | 4.71 | 91.68 | 68.67 | 1271   | 19.72 |
| 2014/6/17 | 106.36 | 106.95 | 77702.37 | 44078.73 | 4.71 | 91.78 | 68.19 | 1270.3 | 19.72 |
| 2014/6/18 | 105.97 | 106.64 | 77702.37 | 44078.73 | 4.66 | 91.62 | 68.17 | 1272.7 | 19.85 |
| 2014/6/19 | 106.43 | 107.08 | 77702.37 | 44078.73 | 4.66 | 91.35 | 69.07 | 1320.1 | 20.02 |
| 2014/6/20 | 107.26 | 107.95 | 77702.37 | 44078.73 | 4.53 | 91.51 | 68.64 | 1314.8 | 20.86 |
| 2014/6/23 | 106.17 | 106.83 | 77702.37 | 44078.73 | 4.45 | 91.42 | 69.01 | 1316.6 | 20.86 |
| 2014/6/24 | 106.03 | 106.64 | 77702.37 | 44078.73 | 4.54 | 91.64 | 69.65 | 1318.9 | 20.86 |
| 2014/6/25 | 106.5  | 107.04 | 77702.37 | 44078.73 | 4.55 | 91.66 | 70.08 | 1321.8 | 20.86 |
| 2014/6/26 | 105.84 | 106.49 | 77702.37 | 44078.73 | 4.4  | 91.43 | 70.33 | 1316.2 | 20.86 |
| 2014/6/27 | 105.74 | 106.46 | 77702.37 | 44078.73 | 4.41 | 91.38 | 70.38 | 1315.4 | 20.91 |
| 2014/6/30 | 105.37 | 106.07 | 77702.37 | 44078.73 | 4.46 | 90.97 | 69.39 | 1328.4 | 21.02 |
| 2014/7/1  | 105.34 | 106.06 | 77884.83 | 44719.09 | 4.46 | 90.54 | 68.3  | 1326.9 | 21.11 |
| 2014/7/2  | 104.48 | 105.18 | 77884.83 | 44719.09 | 4.36 | 90.45 | 68.06 | 1329.2 | 21.16 |
| 2014/7/3  | 104.06 | 104.76 | 77884.83 | 44719.09 | 4.41 | 90.52 | 68.16 | 1319.8 | 21.12 |
| 2014/7/7  | 103.53 | 104.19 | 77884.83 | 44719.09 | 4.23 | 90.64 | 67.44 | 1320.3 | 21.04 |
| 2014/7/8  | 103.4  | 104.06 | 77884.83 | 44719.09 | 4.2  | 90.63 | 67.78 | 1316   | 21.04 |
| 2014/7/9  | 102.29 | 102.93 | 77884.83 | 44719.09 | 4.17 | 90.64 | 68.48 | 1330.4 | 21.14 |
| 2014/7/10 | 102.93 | 103.61 | 77884.83 | 44719.09 | 4.12 | 90.62 | 68.97 | 1337.8 | 21.41 |
| 2014/7/11 | 100.83 | 101.48 | 77884.83 | 44719.09 | 4.15 | 90.71 | 68.55 | 1339   | 21.44 |
| 2014/7/14 | 100.91 | 101.73 | 77884.83 | 44719.09 | 4.15 | 90.87 | 68.04 | 1308.4 | 20.88 |
| 2014/7/15 | 99.96  | 100.56 | 77884.83 | 44719.09 | 4.1  | 90.57 | 68.15 | 1295   | 20.7  |
| 2014/7/16 | 101.2  | 101.88 | 77884.83 | 44719.09 | 4.12 | 90.59 | 67.84 | 1298.4 | 20.79 |
| 2014/7/17 | 103.19 | 103.84 | 77884.83 | 44719.09 | 3.95 | 90.79 | 67.09 | 1316.5 | 21.12 |
| 2014/7/18 | 103.13 | 103.83 | 77884.83 | 44719.09 | 3.95 | 90.88 | 66.49 | 1310.4 | 20.75 |
| 2014/7/21 | 104.59 | 105.34 | 77884.83 | 44719.09 | 3.85 | 90.93 | 66.71 | 1313.4 | 20.91 |
| 2014/7/22 | 104.42 | 104.59 | 77884.83 | 44719.09 | 3.77 | 90.98 | 66.82 | 1319   | 20.96 |
| 2014/7/23 | 103.12 | 103.81 | 77884.83 | 44719.09 | 3.76 | 91.11 | 67.25 | 1319   | 20.94 |
| 2014/7/24 | 102.07 | 102.76 | 77884.83 | 44719.09 | 3.85 | 91.39 | 66.88 | 1297.5 | 20.48 |
| 2014/7/25 | 102.09 | 105.23 | 77884.83 | 44719.09 | 3.78 | 91.47 | 67.17 | 1294.8 | 20.75 |
| 2014/7/28 | 101.67 | 105.68 | 77884.83 | 44719.09 | 3.75 | 91.42 | 66.6  | 1305.2 | 20.54 |
| 2014/7/29 | 100.97 | 104.91 | 77884.83 | 44719.09 | 3.81 | 91.63 | 66.07 | 1310   | 20.59 |
| 2014/7/30 | 100.27 | 104.29 | 77884.83 | 44719.09 | 3.79 | 91.8  | 66.09 | 1295.6 | 20.55 |
| 2014/7/31 | 98.17  | 98.23  | 77884.83 | 44719.09 | 3.84 | 91.95 | 66.76 | 1281.7 | 20.59 |
| 2014/8/1  | 97.88  | 97.86  | 78190.25 | 44867.74 | 3.8  | 92.74 | 66.36 | 1293.1 | 20.3  |
| 2014/8/4  | 98.29  | 98.26  | 78190.25 | 44867.74 | 3.83 | 92.52 | 66.67 | 1288.3 | 20.17 |
| 2014/8/5  | 97.38  | 97.34  | 78190.25 | 44867.74 | 3.9  | 92.39 | 66.29 | 1287.7 | 20.17 |
| 2014/8/6  | 96.92  | 96.93  | 78190.25 | 44867.74 | 3.93 | 92.56 | 65.69 | 1305.8 | 20.03 |
| 2014/8/7  | 97.34  | 97.34  | 78190.25 | 44867.74 | 3.88 | 92.67 | 65.54 | 1311.4 | 20.03 |
| 2014/8/8  | 97.65  | 97.61  | 78190.25 | 44867.74 | 3.96 | 93    | 65.26 | 1310.6 | 19.93 |
| 2014/8/11 | 98.08  | 98.09  | 78190.25 | 44867.74 | 3.97 | 92.91 | 66.1  | 1307.5 | 19.93 |
| 2014/8/12 | 97.37  | 97.36  | 78190.25 | 44867.74 | 3.97 | 92.79 | 66.07 | 1309   | 19.93 |
| 2014/8/13 | 97.59  | 97.57  | 78190.25 | 44867.74 | 3.83 | 93.46 | 65.66 | 1311.9 | 19.93 |
| 2014/8/14 | 95.58  | 95.54  | 78190.25 | 44867.74 | 3.91 | 93.48 | 66.59 | 1311.9 | 19.87 |
| 2014/8/15 | 97.35  | 97.3   | 78190.25 | 44867.74 | 3.78 | 93.47 | 66.59 | 1304   | 19.53 |
| 2014/8/18 | 96.41  | 96.44  | 78190.25 | 44867.74 | 3.79 | 93.25 | 66.34 | 1299.3 | 19.56 |
| 2014/8/19 | 94.48  | 94.35  | 78190.25 | 44867.74 | 3.88 | 93.88 | 66.31 | 1294   | 19.42 |
| 2014/8/20 | 96.07  | 96.4   | 78190.25 | 44867.74 | 3.82 | 94    | 66.43 | 1288.4 | 19.45 |
| 2014/8/21 | 93.96  | 93.97  | 78190.25 | 44867.74 | 3.89 | 94.08 | 66.39 | 1276.3 | 19.41 |
| 2014/8/22 | 93.65  | 93.61  | 78190.25 | 44867.74 | 3.84 | 94.16 | 66.99 | 1279.9 | 19.41 |
| 2014/8/25 | 93.35  | 95.39  | 78190.25 | 44867.74 | 3.94 | 94.14 | 66.84 | 1274.5 | 19.35 |
| 2014/8/26 | 93.86  | 95.78  | 78190.25 | 44867.74 | 3.91 | 94.3  | 66.76 | 1283.7 | 19.5  |
| 2014/8/27 | 93.88  | 95.82  | 78190.25 | 44867.74 | 3.96 | 94.11 | 66.82 | 1281.7 | 19.4  |

|            |       |       |          |          |      |        |       |        |       |
|------------|-------|-------|----------|----------|------|--------|-------|--------|-------|
| 2014/8/28  | 94.55 | 96.44 | 78190.25 | 44867.74 | 4.04 | 94.04  | 66.43 | 1289.3 | 19.46 |
| 2014/8/29  | 95.96 | 97.86 | 78190.25 | 44867.74 | 4.07 | 93.98  | 65.26 | 1285.7 | 19.4  |
| 2014/9/2   | 92.88 | 92.92 | 78952.72 | 45891.46 | 3.89 | 94.73  | 64.33 | 1264.9 | 19.11 |
| 2014/9/3   | 95.54 | 95.5  | 78952.72 | 45891.46 | 3.85 | 94.78  | 64.7  | 1268.6 | 19.15 |
| 2014/9/4   | 94.45 | 94.51 | 78952.72 | 45891.46 | 3.82 | 95.62  | 65.7  | 1262.4 | 18.99 |
| 2014/9/5   | 93.29 | 93.32 | 78952.72 | 45891.46 | 3.79 | 95.58  | 66.01 | 1268.1 | 19.07 |
| 2014/9/8   | 92.66 | 92.64 | 78952.72 | 45891.46 | 3.88 | 96.93  | 66.35 | 1262.2 | 18.98 |
| 2014/9/9   | 92.75 | 92.73 | 78952.72 | 45891.46 | 3.98 | 96.87  | 66.79 | 1262.2 | 18.9  |
| 2014/9/10  | 91.67 | 91.71 | 78952.72 | 45891.46 | 3.95 | 96.3   | 66.33 | 1248.3 | 18.89 |
| 2014/9/11  | 92.83 | 92.89 | 78952.72 | 45891.46 | 3.82 | 95.86  | 65.61 | 1248.3 | 18.64 |
| 2014/9/12  | 92.27 | 92.18 | 78952.72 | 45891.46 | 3.86 | 95.93  | 65.01 | 1227   | 18.59 |
| 2014/9/15  | 92.92 | 92.86 | 78952.72 | 45891.46 | 3.93 | 96.14  | 64.48 | 1232.8 | 18.61 |
| 2014/9/16  | 94.88 | 94.91 | 78952.72 | 45891.46 | 4    | 95.9   | 63.51 | 1235.9 | 18.68 |
| 2014/9/17  | 94.42 | 94.33 | 78952.72 | 45891.46 | 4.01 | 95.98  | 63.62 | 1222.5 | 18.47 |
| 2014/9/18  | 93.07 | 93.07 | 78952.72 | 45891.46 | 3.91 | 94.89  | 63.61 | 1220.4 | 18.46 |
| 2014/9/19  | 92.41 | 92.43 | 78952.72 | 45891.46 | 3.84 | 95.8   | 62.93 | 1218.3 | 17.82 |
| 2014/9/22  | 91.52 | 91.46 | 78952.72 | 45891.46 | 3.85 | 95.36  | 63.08 | 1213.4 | 17.7  |
| 2014/9/23  | 91.56 | 91.55 | 78952.72 | 45891.46 | 3.82 | 95.19  | 62.93 | 1213.4 | 17.71 |
| 2014/9/24  | 92.8  | 93.6  | 78952.72 | 45891.46 | 3.91 | 95.51  | 63.24 | 1216.8 | 17.57 |
| 2014/9/25  | 92.53 | 93.59 | 78952.72 | 45891.46 | 3.97 | 95.61  | 63.74 | 1209.7 | 17.42 |
| 2014/9/26  | 93.54 | 95.55 | 78952.72 | 45891.46 | 3.98 | 96.05  | 62.98 | 1209.7 | 17.42 |
| 2014/9/29  | 94.57 | 94.53 | 78952.72 | 45891.46 | 4.15 | 96.06  | 62.13 | 1214.8 | 17.42 |
| 2014/10/3  | 89.74 | 89.76 | 79902.31 | 45296.55 | 4.04 | 98.08  | 61.73 | 1191.3 | 16.8  |
| 2014/10/6  | 90.34 | 90.33 | 79902.31 | 45296.55 | 3.9  | 97.43  | 61.87 | 1207.6 | 17.17 |
| 2014/10/7  | 88.85 | 88.89 | 79902.31 | 45296.55 | 3.96 | 97.27  | 61.73 | 1210.2 | 17.11 |
| 2014/10/8  | 87.31 | 87.29 | 79902.31 | 45296.55 | 3.86 | 96.9   | 61.52 | 1216.7 | 17.35 |
| 2014/10/9  | 85.77 | 85.76 | 79902.31 | 45296.55 | 3.85 | 97.14  | 61.09 | 1225   | 17.6  |
| 2014/10/10 | 85.82 | 85.87 | 79902.31 | 45296.55 | 3.86 | 97.43  | 61.07 | 1221.4 | 17.3  |
| 2014/10/13 | 85.74 | 85.73 | 79902.31 | 45296.55 | 3.92 | 97.41  | 60.93 | 1227   | 17.41 |
| 2014/10/14 | 81.84 | 81.72 | 79902.31 | 45296.55 | 3.82 | 98.44  | 60.71 | 1235.8 | 17.5  |
| 2014/10/15 | 81.78 | 81.82 | 79902.31 | 45296.55 | 3.8  | 97.84  | 60.65 | 1245.4 | 17.41 |
| 2014/10/16 | 82.7  | 82.33 | 79902.31 | 45296.55 | 3.8  | 97.42  | 60.65 | 1236.7 | 17.43 |
| 2014/10/17 | 82.75 | 82.8  | 79902.31 | 45296.55 | 3.77 | 97.3   | 59.99 | 1237.5 | 17.43 |
| 2014/10/20 | 82.71 | 82.76 | 79902.31 | 45296.55 | 3.67 | 96.91  | 60.01 | 1243.9 | 17.46 |
| 2014/10/21 | 82.81 | 83.25 | 79902.31 | 45296.55 | 3.71 | 97.15  | 59.55 | 1243.9 | 17.5  |
| 2014/10/22 | 80.52 | 80.52 | 79902.31 | 45296.55 | 3.66 | 97.61  | 59.91 | 1243.9 | 17.12 |
| 2014/10/23 | 82.09 | 82.81 | 79902.31 | 45296.55 | 3.62 | 97.66  | 59.36 | 1227.9 | 17.17 |
| 2014/10/24 | 81.01 | 81.27 | 79902.31 | 45296.55 | 3.62 | 97.34  | 58.94 | 1230.7 | 17.17 |
| 2014/10/27 | 81    | 81.26 | 79902.31 | 45296.55 | 3.56 | 97.15  | 58.5  | 1228.6 | 17.17 |
| 2014/10/28 | 81.42 | 81.36 | 79902.31 | 45296.55 | 3.65 | 97.06  | 57.83 | 1230.7 | 17.17 |
| 2014/10/29 | 82.2  | 82.25 | 79902.31 | 45296.55 | 3.73 | 97.78  | 57.43 | 1230.7 | 17.17 |
| 2014/10/30 | 81.12 | 81.06 | 79902.31 | 45296.55 | 3.83 | 97.85  | 56.98 | 1198.9 | 16.34 |
| 2014/10/31 | 80.54 | 80.53 | 79902.31 | 45296.55 | 3.87 | 97.91  | 57.92 | 1173.3 | 15.88 |
| 2014/11/3  | 78.78 | 78.77 | 79709.45 | 45440.77 | 4.05 | 98.29  | 57.92 | 1165   | 16.04 |
| 2014/11/4  | 77.19 | 77.15 | 79709.45 | 45440.77 | 4.13 | 98.07  | 57.92 | 1167.8 | 15.93 |
| 2014/11/5  | 78.68 | 78.71 | 79709.45 | 45440.77 | 4.19 | 98.24  | 54.87 | 1139.8 | 15.22 |
| 2014/11/6  | 77.91 | 77.87 | 79709.45 | 45440.77 | 4.4  | 99.11  | 53.84 | 1140   | 15.22 |
| 2014/11/7  | 78.65 | 78.71 | 79709.45 | 45440.77 | 4.41 | 98.91  | 51.3  | 1169.7 | 15.05 |
| 2014/11/10 | 77.4  | 77.43 | 79709.45 | 45440.77 | 4.26 | 99.07  | 53.31 | 1150.9 | 15.05 |
| 2014/11/11 | 77.94 | 77.85 | 79709.45 | 45440.77 | 4.25 | 98.59  | 53.42 | 1165.5 | 15.05 |
| 2014/11/12 | 77.18 | 77.16 | 79709.45 | 45440.77 | 4.19 | 99.48  | 52.67 | 1157.5 | 15.72 |
| 2014/11/13 | 74.21 | 74.13 | 79709.45 | 45440.77 | 3.98 | 99.91  | 53.44 | 1164.5 | 15.72 |
| 2014/11/14 | 75.82 | 75.91 | 79709.45 | 45440.77 | 4.02 | 100.17 | 52.31 | 1187.1 | 16.31 |
| 2014/11/17 | 75.64 | 75.64 | 79709.45 | 45440.77 | 4.34 | 100.35 | 52.45 | 1182.7 | 16.31 |

|            |       |       |          |          |      |        |       |        |       |
|------------|-------|-------|----------|----------|------|--------|-------|--------|-------|
| 2014/11/18 | 74.61 | 74.55 | 79709.45 | 45440.77 | 4.24 | 100.39 | 52.89 | 1197.1 | 16.31 |
| 2014/11/19 | 74.58 | 74.55 | 79709.45 | 45440.77 | 4.37 | 100.08 | 52.94 | 1193.5 | 16.31 |
| 2014/11/20 | 75.58 | 75.63 | 79709.45 | 45440.77 | 4.49 | 100.01 | 53.15 | 1191.9 | 16.31 |
| 2014/11/21 | 76.51 | 76.52 | 79709.45 | 45440.77 | 4.27 | 100.28 | 54.16 | 1200.3 | 16.31 |
| 2014/11/24 | 75.78 | 75.74 | 79709.45 | 45440.77 | 4.15 | 99.92  | 55.43 | 1196.5 | 16.48 |
| 2014/11/25 | 74.09 | 74.04 | 79709.45 | 45440.77 | 4.28 | 99.94  | 55.16 | 1196.5 | 16.48 |
| 2014/11/26 | 73.69 | 73.7  | 79709.45 | 45440.77 | 4.36 | 99.39  | 53.28 | 1197   | 16.47 |
| 2014/11/28 | 66.15 | 65.94 | 79709.45 | 45440.77 | 4.09 | 100.3  | 50.25 | 1167   | 15.37 |
| 2014/12/1  | 69    | 68.98 | 80542.49 | 48051.54 | 4.01 | 100.35 | 46.78 | 1211.9 | 16.41 |
| 2014/12/2  | 66.88 | 66.99 | 80542.49 | 48051.54 | 3.87 | 100.92 | 47.53 | 1197.6 | 16.36 |
| 2014/12/3  | 67.38 | 67.3  | 80542.49 | 48051.54 | 3.81 | 100.64 | 44.59 | 1209.7 | 16.3  |
| 2014/12/4  | 66.81 | 66.73 | 80542.49 | 48051.54 | 3.65 | 100.7  | 45.84 | 1207.5 | 16.53 |
| 2014/12/5  | 65.84 | 65.89 | 80542.49 | 48051.54 | 3.8  | 101.28 | 45.58 | 1189.7 | 16.24 |
| 2014/12/8  | 63.05 | 63.13 | 80542.49 | 48051.54 | 3.6  | 100.84 | 45.72 | 1204.2 | 16.21 |
| 2014/12/9  | 63.82 | 63.74 | 80542.49 | 48051.54 | 3.65 | 100.75 | 44.57 | 1231.1 | 17.01 |
| 2014/12/10 | 60.94 | 60.99 | 80542.49 | 48051.54 | 3.71 | 100.44 | 44.56 | 1228.7 | 17.09 |
| 2014/12/11 | 59.95 | 60.01 | 80542.49 | 48051.54 | 3.63 | 100.35 | 44.04 | 1223.9 | 17.17 |
| 2014/12/12 | 57.81 | 57.81 | 80542.49 | 48051.54 | 3.8  | 100.4  | 42.37 | 1222.4 | 17.11 |
| 2014/12/15 | 55.91 | 55.96 | 80542.49 | 48051.54 | 3.72 | 100.93 | 41.31 | 1198.4 | 16.85 |
| 2014/12/16 | 55.93 | 55.97 | 80542.49 | 48051.54 | 3.62 | 100.22 | 39.61 | 1194   | 16.16 |
| 2014/12/17 | 56.47 | 56.43 | 80542.49 | 48051.54 | 3.7  | 100.51 | 35.59 | 1194.7 | 15.83 |
| 2014/12/18 | 54.11 | 54.18 | 80542.49 | 48051.54 | 3.64 | 100.73 | 40.79 | 1198   | 15.83 |
| 2014/12/19 | 56.52 | 56.91 | 80542.49 | 48051.54 | 3.46 | 101.06 | 39.87 | 1197.2 | 15.83 |
| 2014/12/22 | 55.26 | 55.25 | 80542.49 | 48051.54 | 3.14 | 101.26 | 42.88 | 1175.1 | 16.11 |
| 2014/12/23 | 57.12 | 56.78 | 80542.49 | 48051.54 | 3.17 | 101.7  | 44.54 | 1175   | 15.68 |
| 2014/12/24 | 55.84 | 55.7  | 80542.49 | 48051.54 | 3.03 | 101.48 | 44.74 | 1173.7 | 15.68 |
| 2014/12/26 | 54.73 | 54.59 | 80542.49 | 48051.54 | 3.01 | 101.45 | 46.82 | 1194.4 | 16.12 |
| 2014/12/29 | 53.61 | 53.46 | 80542.49 | 48051.54 | 3.19 | 101.73 | 42.95 | 1181.3 | 15.91 |
| 2014/12/30 | 54.12 | 54.14 | 80542.49 | 48051.54 | 3.09 | 101.42 | 43.34 | 1198.9 | 16.27 |
| 2014/12/31 | 53.27 | 53.45 | 80542.49 | 48051.54 | 2.89 | 101.33 | 41.35 | 1183.8 | 15.7  |
| 2015/1/2   | 52.69 | 52.72 | 79916.12 | 46075.84 | 3    | 102.65 | 41.35 | 1186.3 | 15.67 |
| 2015/1/5   | 50.04 | 50.05 | 79916.12 | 46075.84 | 2.88 | 103.16 | 41.35 | 1205.5 | 15.67 |
| 2015/1/6   | 47.93 | 47.98 | 79916.12 | 46075.84 | 2.94 | 103.84 | 41.35 | 1218.6 | 15.67 |
| 2015/1/7   | 48.65 | 48.69 | 79916.12 | 46075.84 | 2.87 | 104.1  | 41.35 | 1215   | 16.51 |
| 2015/1/8   | 48.79 | 48.8  | 79916.12 | 46075.84 | 2.93 | 104.26 | 41.35 | 1208.7 | 16.51 |
| 2015/1/9   | 48.36 | 48.35 | 79916.12 | 46075.84 | 2.95 | 103.77 | 41.35 | 1219.5 | 16.51 |
| 2015/1/12  | 46.07 | 46.06 | 79916.12 | 46075.84 | 2.8  | 103.7  | 38.18 | 1233.3 | 16.51 |
| 2015/1/13  | 45.89 | 45.92 | 79916.12 | 46075.84 | 2.94 | 103.8  | 36.88 | 1230.3 | 17    |
| 2015/1/14  | 48.48 | 48.49 | 79916.12 | 46075.84 | 3.23 | 103.27 | 36.03 | 1230.3 | 16.9  |
| 2015/1/15  | 46.25 | 46.37 | 79916.12 | 46075.84 | 3.16 | 103.62 | 36.69 | 1259   | 17.03 |
| 2015/1/16  | 48.69 | 48.49 | 79916.12 | 46075.84 | 3.13 | 103.93 | 36.48 | 1279.7 | 17.77 |
| 2015/1/20  | 46.39 | 46.79 | 79916.12 | 46075.84 | 2.83 | 103.86 | 36.88 | 1294.1 | 18    |
| 2015/1/21  | 47.78 | 47.85 | 79916.12 | 46075.84 | 2.97 | 103.89 | 36.39 | 1287.6 | 18.26 |
| 2015/1/22  | 46.31 | 45.93 | 79916.12 | 46075.84 | 2.84 | 104.83 | 36.53 | 1300.7 | 18.26 |
| 2015/1/23  | 45.59 | 45.26 | 79916.12 | 46075.84 | 2.99 | 104.97 | 38.08 | 1298.7 | 18.36 |
| 2015/1/26  | 45.15 | 44.8  | 79916.12 | 46075.84 | 2.88 | 104.31 | 36.73 | 1281.4 | 18.36 |
| 2015/1/27  | 46.23 | 45.84 | 79916.12 | 46075.84 | 2.98 | 103.53 | 35.36 | 1288.8 | 18.11 |
| 2015/1/28  | 44.45 | 44.08 | 79916.12 | 46075.84 | 2.87 | 103.92 | 35.53 | 1286.6 | 18.11 |
| 2015/1/29  | 44.53 | 44.12 | 79916.12 | 46075.84 | 2.72 | 104.43 | 34.83 | 1257.7 | 17.45 |
| 2015/1/30  | 48.24 | 47.79 | 79916.12 | 46075.84 | 2.69 | 104.56 | 34.8  | 1283   | 17.17 |
| 2015/2/2   | 49.57 | 49.25 | 79822.53 | 47790.38 | 2.68 | 104.38 | 33.85 | 1273.7 | 17.17 |
| 2015/2/3   | 53.05 | 53.04 | 79822.53 | 47790.38 | 2.75 | 103.48 | 34.87 | 1259.7 | 17.52 |
| 2015/2/4   | 48.45 | 48.45 | 79822.53 | 47790.38 | 2.66 | 103.38 | 35.78 | 1271.3 | 17.41 |
| 2015/2/5   | 50.48 | 50.48 | 79822.53 | 47790.38 | 2.6  | 102.4  | 34.03 | 1265.2 | 17.29 |

|           |       |       |          |          |      |        |       |        |       |
|-----------|-------|-------|----------|----------|------|--------|-------|--------|-------|
| 2015/2/6  | 51.69 | 51.66 | 79822.53 | 47790.38 | 2.58 | 102.95 | 35.06 | 1232.6 | 17.29 |
| 2015/2/9  | 52.86 | 52.99 | 79822.53 | 47790.38 | 2.6  | 103.17 | 35.38 | 1238.2 | 17.29 |
| 2015/2/10 | 50.02 | 50.06 | 79822.53 | 47790.38 | 2.68 | 102.91 | 35.57 | 1234.1 | 17.29 |
| 2015/2/11 | 48.84 | 48.8  | 79822.53 | 47790.38 | 2.8  | 103.01 | 35.18 | 1219.7 | 17.29 |
| 2015/2/12 | 51.21 | 51.17 | 79822.53 | 47790.38 | 2.71 | 102.02 | 35.21 | 1221.1 | 16.84 |
| 2015/2/13 | 52.78 | 52.66 | 79822.53 | 47790.38 | 2.8  | 101.92 | 35.45 | 1228.1 | 17.04 |
| 2015/2/17 | 53.53 | 53.56 | 79822.53 | 47790.38 | 2.76 | 102.26 | 36.78 | 1207.4 | 17.04 |
| 2015/2/18 | 52.14 | 52.13 | 79822.53 | 47790.38 | 2.83 | 101.69 | 37.04 | 1210.2 | 17.04 |
| 2015/2/19 | 51.16 | 51.12 | 79822.53 | 47790.38 | 2.83 | 101.83 | 36.97 | 1205   | 16.34 |
| 2015/2/20 | 50.34 | 49.95 | 79822.53 | 47790.38 | 2.95 | 101.95 | 37.3  | 1199.1 | 16.43 |
| 2015/2/23 | 49.45 | 49.56 | 79822.53 | 47790.38 | 2.88 | 101.55 | 37.3  | 1201.2 | 16.33 |
| 2015/2/24 | 49.28 | 48.48 | 79822.53 | 47790.38 | 2.9  | 101.55 | 36.17 | 1196.5 | 16.33 |
| 2015/2/25 | 50.99 | 50.25 | 79822.53 | 47790.38 | 2.89 | 101.45 | 36.56 | 1203   | 16.33 |
| 2015/2/26 | 48.17 | 47.65 | 79822.53 | 47790.38 | 2.7  | 101.85 | 37.64 | 1208.6 | 16.53 |
| 2015/2/27 | 49.76 | 49.84 | 79822.53 | 47790.38 | 2.73 | 101.69 | 37.55 | 1213.6 | 16.55 |
| 2015/3/2  | 49.59 | 49.59 | 80717.43 | 45876.68 | 2.7  | 101.78 | 36.67 | 1206.4 | 16.37 |
| 2015/3/3  | 50.52 | 50.43 | 80717.43 | 45876.68 | 2.71 | 101.78 | 36.65 | 1201.2 | 16.19 |
| 2015/3/4  | 51.53 | 51.53 | 80717.43 | 45876.68 | 2.77 | 102.42 | 36.96 | 1198   | 16.14 |
| 2015/3/5  | 50.76 | 50.76 | 80717.43 | 45876.68 | 2.84 | 102.6  | 37.24 | 1196.3 | 16.14 |
| 2015/3/6  | 49.61 | 49.61 | 80717.43 | 45876.68 | 2.84 | 103.93 | 38.46 | 1196.3 | 16.14 |
| 2015/3/9  | 50    | 49.95 | 80717.43 | 45876.68 | 2.68 | 103.35 | 38.46 | 1166.3 | 15.69 |
| 2015/3/10 | 48.29 | 48.42 | 80717.43 | 45876.68 | 2.73 | 103.85 | 38.43 | 1161.3 | 15.67 |
| 2015/3/11 | 48.17 | 48.06 | 80717.43 | 45876.68 | 2.82 | 104.72 | 37.18 | 1150   | 15.47 |
| 2015/3/12 | 47.05 | 47.12 | 80717.43 | 45876.68 | 2.73 | 105.05 | 38.46 | 1152.3 | 15.52 |
| 2015/3/13 | 44.84 | 44.88 | 80717.43 | 45876.68 | 2.73 | 106.06 | 38.54 | 1152.7 | 15.59 |
| 2015/3/16 | 43.88 | 43.93 | 80717.43 | 45876.68 | 2.72 | 105.45 | 38.24 | 1153.8 | 15.6  |
| 2015/3/17 | 43.46 | 43.39 | 80717.43 | 45876.68 | 2.86 | 106.05 | 38.5  | 1148.3 | 15.55 |
| 2015/3/18 | 44.66 | 44.63 | 80717.43 | 45876.68 | 2.92 | 104.53 | 38.88 | 1167.3 | 15.88 |
| 2015/3/19 | 43.96 | 44.02 | 80717.43 | 45876.68 | 2.81 | 105.95 | 39.67 | 1170.3 | 16.1  |
| 2015/3/20 | 45.72 | 46    | 80717.43 | 45876.68 | 2.79 | 104.57 | 39.73 | 1185.4 | 16.73 |
| 2015/3/23 | 47.45 | 47.4  | 80717.43 | 45876.68 | 2.73 | 104.56 | 39.76 | 1182.9 | 16.98 |
| 2015/3/24 | 47.51 | 47.03 | 80717.43 | 45876.68 | 2.79 | 105.33 | 39.99 | 1190   | 16.98 |
| 2015/3/25 | 49.21 | 48.75 | 80717.43 | 45876.68 | 2.72 | 105.04 | 41.15 | 1198.8 | 17.05 |
| 2015/3/26 | 51.43 | 51.41 | 80717.43 | 45876.68 | 2.67 | 105.28 | 41.61 | 1204.9 | 17.12 |
| 2015/3/27 | 48.87 | 48.83 | 80717.43 | 45876.68 | 2.59 | 105.09 | 41.08 | 1196.3 | 17.01 |
| 2015/3/30 | 48.68 | 48.66 | 80717.43 | 45876.68 | 2.64 | 105.63 | 40.45 | 1185.3 | 16.66 |
| 2015/3/31 | 47.6  | 47.72 | 80717.43 | 45876.68 | 2.64 | 105.47 | 41.14 | 1183.2 | 16.62 |
| 2015/4/1  | 50.09 | 50.12 | 80376.07 | 46661.81 | 2.61 | 105.45 | 40.49 | 1204.2 | 16.62 |
| 2015/4/2  | 49.14 | 49.13 | 80376.07 | 46661.81 | 2.71 | 105.4  | 41.44 | 1201.4 | 16.62 |
| 2015/4/6  | 52.14 | 52.08 | 80376.07 | 46661.81 | 2.65 | 105    | 41.49 | 1214.2 | 17.08 |
| 2015/4/7  | 53.98 | 53.95 | 80376.07 | 46661.81 | 2.68 | 105.54 | 42.5  | 1209.5 | 17.08 |
| 2015/4/8  | 50.42 | 50.44 | 80376.07 | 46661.81 | 2.62 | 105.13 | 43.55 | 1202.9 | 17.08 |
| 2015/4/9  | 50.79 | 50.79 | 80376.07 | 46661.81 | 2.53 | 106.29 | 45.12 | 1194.3 | 17.08 |
| 2015/4/10 | 51.64 | 51.63 | 80376.07 | 46661.81 | 2.51 | 106.86 | 46.73 | 1207.3 | 16.4  |
| 2015/4/13 | 51.91 | 51.95 | 80376.07 | 46661.81 | 2.51 | 106.56 | 45.82 | 1199.2 | 16.4  |
| 2015/4/14 | 53.29 | 53.3  | 80376.07 | 46661.81 | 2.53 | 105.79 | 45.99 | 1192.3 | 16.4  |
| 2015/4/15 | 56.39 | 56.25 | 80376.07 | 46661.81 | 2.61 | 105.4  | 47.11 | 1202.9 | 16.4  |
| 2015/4/16 | 56.71 | 56.69 | 80376.07 | 46661.81 | 2.68 | 104.68 | 47.58 | 1197.8 | 16.29 |
| 2015/4/17 | 55.74 | 55.71 | 80376.07 | 46661.81 | 2.63 | 104.51 | 46.31 | 1204.1 | 16.29 |
| 2015/4/20 | 56.38 | 56.37 | 80376.07 | 46661.81 | 2.54 | 104.89 | 45.43 | 1192.9 | 16.29 |
| 2015/4/21 | 55.26 | 55.58 | 80376.07 | 46661.81 | 2.58 | 104.75 | 43.66 | 1201.7 | 15.92 |
| 2015/4/22 | 56.16 | 56.17 | 80376.07 | 46661.81 | 2.61 | 104    | 43.7  | 1186.5 | 15.92 |
| 2015/4/23 | 57.74 | 56.59 | 80376.07 | 46661.81 | 2.53 | 103.81 | 45.29 | 1193.8 | 15.92 |
| 2015/4/24 | 57.15 | 55.98 | 80376.07 | 46661.81 | 2.53 | 102.93 | 46.06 | 1176.8 | 15.92 |

|           |       |       |          |          |      |        |       |        |       |
|-----------|-------|-------|----------|----------|------|--------|-------|--------|-------|
| 2015/4/27 | 56.99 | 55.56 | 80376.07 | 46661.81 | 2.49 | 102.66 | 44.97 | 1205.5 | 15.94 |
| 2015/4/28 | 57.06 | 57.05 | 80376.07 | 46661.81 | 2.52 | 101.94 | 43.99 | 1205.3 | 15.94 |
| 2015/4/29 | 58.58 | 58.55 | 80376.07 | 46661.81 | 2.61 | 101.32 | 43.99 | 1201.9 | 16.53 |
| 2015/4/30 | 59.63 | 59.62 | 80376.07 | 46661.81 | 2.75 | 101.87 | 44.22 | 1183   | 16.12 |
| 2015/5/1  | 59.15 | 59.1  | 80285.19 | 43705.98 | 2.78 | 102.95 | 44.22 | 1177.5 | 16.12 |
| 2015/5/4  | 58.93 | 58.92 | 80285.19 | 43705.98 | 2.82 | 103.06 | 44.22 | 1189.4 | 16.4  |
| 2015/5/5  | 60.4  | 60.38 | 80285.19 | 43705.98 | 2.78 | 102.68 | 44.68 | 1192.9 | 16.52 |
| 2015/5/6  | 60.93 | 60.93 | 80285.19 | 43705.98 | 2.78 | 102.24 | 46.14 | 1193.8 | 16.5  |
| 2015/5/7  | 58.94 | 58.99 | 80285.19 | 43705.98 | 2.73 | 101.08 | 45.78 | 1182.5 | 16.27 |
| 2015/5/8  | 59.39 | 59.41 | 80285.19 | 43705.98 | 2.88 | 100.82 | 44.55 | 1186.9 | 16.43 |
| 2015/5/11 | 59.25 | 59.23 | 80285.19 | 43705.98 | 2.8  | 99.99  | 44.55 | 1179.3 | 16.31 |
| 2015/5/12 | 60.75 | 60.72 | 80285.19 | 43705.98 | 2.9  | 99.45  | 44.11 | 1179.3 | 16.31 |
| 2015/5/13 | 60.5  | 60.5  | 80285.19 | 43705.98 | 2.94 | 99.02  | 45.03 | 1194.8 | 16.51 |
| 2015/5/14 | 59.88 | 59.89 | 80285.19 | 43705.98 | 3.01 | 98.81  | 44.32 | 1215.8 | 17.09 |
| 2015/5/15 | 59.69 | 59.73 | 80285.19 | 43705.98 | 3.02 | 99.14  | 44.37 | 1221.9 | 17.41 |
| 2015/5/18 | 59.43 | 59.44 | 80285.19 | 43705.98 | 3.01 | 99.57  | 45.38 | 1224.7 | 17.53 |
| 2015/5/19 | 57.26 | 57.3  | 80285.19 | 43705.98 | 2.95 | 100.49 | 45.67 | 1225.1 | 17.71 |
| 2015/5/20 | 58.98 | 58.96 | 80285.19 | 43705.98 | 2.92 | 100.36 | 45.33 | 1206.9 | 17.11 |
| 2015/5/21 | 60.72 | 60.18 | 80285.19 | 43705.98 | 2.95 | 99.55  | 44.92 | 1210.8 | 17.1  |
| 2015/5/22 | 59.72 | 58.88 | 80285.19 | 43705.98 | 2.89 | 100.62 | 44.87 | 1205.7 | 17.09 |
| 2015/5/26 | 58.03 | 57.29 | 80285.19 | 43705.98 | 2.82 | 101.33 | 45.17 | 1187.4 | 16.75 |
| 2015/5/27 | 57.51 | 57.51 | 80285.19 | 43705.98 | 2.82 | 101.53 | 44.49 | 1187.4 | 16.7  |
| 2015/5/28 | 57.68 | 57.69 | 80285.19 | 43705.98 | 2.71 | 101.75 | 43.55 | 1187.8 | 16.7  |
| 2015/5/29 | 60.3  | 60.25 | 80285.19 | 43705.98 | 2.64 | 101.91 | 43.17 | 1190.3 | 16.69 |
| 2015/6/1  | 60.2  | 60.24 | 80716.36 | 46858.29 | 2.65 | 102.29 | 43.33 | 1188.8 | 16.72 |
| 2015/6/2  | 61.26 | 61.3  | 80716.36 | 46858.29 | 2.7  | 101.32 | 43.01 | 1193.2 | 16.72 |
| 2015/6/3  | 59.64 | 59.67 | 80716.36 | 46858.29 | 2.63 | 101.41 | 42.91 | 1185.5 | 16.37 |
| 2015/6/4  | 58    | 58    | 80716.36 | 46858.29 | 2.63 | 101.24 | 41.36 | 1175.3 | 16.14 |
| 2015/6/5  | 59.13 | 59.11 | 80716.36 | 46858.29 | 2.59 | 101.83 | 40.54 | 1169.7 | 16.05 |
| 2015/6/8  | 58.14 | 58.15 | 80716.36 | 46858.29 | 2.71 | 101.33 | 40.89 | 1172.9 | 15.91 |
| 2015/6/9  | 60.14 | 60.15 | 80716.36 | 46858.29 | 2.85 | 101.07 | 40.87 | 1175.5 | 15.97 |
| 2015/6/10 | 61.43 | 61.36 | 80716.36 | 46858.29 | 2.89 | 100.23 | 41.31 | 1185   | 15.97 |
| 2015/6/11 | 60.77 | 60.74 | 80716.36 | 46858.29 | 2.83 | 100.22 | 41.48 | 1180.7 | 15.95 |
| 2015/6/12 | 59.96 | 59.96 | 80716.36 | 46858.29 | 2.75 | 99.88  | 41.48 | 1180.1 | 15.84 |
| 2015/6/15 | 59.52 | 59.53 | 80716.36 | 46858.29 | 2.89 | 99.68  | 40.72 | 1185.5 | 16.2  |
| 2015/6/16 | 59.97 | 60.01 | 80716.36 | 46858.29 | 2.89 | 99.36  | 41.43 | 1179.3 | 16.2  |
| 2015/6/17 | 59.92 | 59.89 | 80716.36 | 46858.29 | 2.86 | 98.21  | 41.38 | 1183.7 | 16.2  |
| 2015/6/18 | 60.45 | 60.41 | 80716.36 | 46858.29 | 2.78 | 97.9   | 41.2  | 1201.3 | 16.2  |
| 2015/6/19 | 59.61 | 59.62 | 80716.36 | 46858.29 | 2.82 | 97.9   | 40.97 | 1200.3 | 16.1  |
| 2015/6/22 | 59.68 | 60.01 | 80716.36 | 46858.29 | 2.73 | 98.28  | 41.16 | 1183   | 16.1  |
| 2015/6/23 | 61.01 | 61.05 | 80716.36 | 46858.29 | 2.73 | 98.87  | 40.87 | 1176.8 | 15.83 |
| 2015/6/24 | 60.27 | 60.01 | 80716.36 | 46858.29 | 2.76 | 99     | 40.92 | 1172.8 | 15.86 |
| 2015/6/25 | 59.7  | 59.59 | 80716.36 | 46858.29 | 2.85 | 98.78  | 40.74 | 1172.2 | 15.86 |
| 2015/6/26 | 59.63 | 59.41 | 80716.36 | 46858.29 | 2.77 | 98.75  | 40.48 | 1170.5 | 15.73 |
| 2015/6/29 | 58.33 | 58.34 | 80716.36 | 46858.29 | 2.81 | 98.81  | 40.1  | 1179.5 | 15.74 |
| 2015/6/30 | 59.47 | 59.48 | 80716.36 | 46858.29 | 2.83 | 98.95  | 39.43 | 1171.1 | 15.67 |
| 2015/7/1  | 56.96 | 56.94 | 81287.96 | 47276.03 | 2.78 | 99.35  | 39.68 | 1168.7 | 15.56 |
| 2015/7/2  | 56.93 | 56.93 | 81287.96 | 47276.03 | 2.82 | 99.49  | 39.88 | 1165.7 | 15.6  |
| 2015/7/6  | 52.53 | 52.48 | 81287.96 | 47276.03 | 2.76 | 99.42  | 39.42 | 1167.3 | 15.7  |
| 2015/7/7  | 52.33 | 52.33 | 81287.96 | 47276.03 | 2.72 | 100.38 | 38.93 | 1153.5 | 14.97 |
| 2015/7/8  | 51.65 | 51.61 | 81287.96 | 47276.03 | 2.69 | 100.98 | 39.24 | 1158.7 | 15.03 |
| 2015/7/9  | 52.78 | 52.76 | 81287.96 | 47276.03 | 2.73 | 100.89 | 39.44 | 1158.4 | 15.34 |
| 2015/7/10 | 52.74 | 52.74 | 81287.96 | 47276.03 | 2.77 | 100.01 | 39.53 | 1162.9 | 15.55 |
| 2015/7/13 | 52.2  | 52.19 | 81287.96 | 47276.03 | 2.77 | 100.18 | 39.37 | 1157.4 | 15.47 |

|           |       |       |          |          |      |        |       |        |       |
|-----------|-------|-------|----------|----------|------|--------|-------|--------|-------|
| 2015/7/14 | 53.04 | 53.05 | 81287.96 | 47276.03 | 2.84 | 99.25  | 39.24 | 1153.9 | 15.33 |
| 2015/7/15 | 51.41 | 51.4  | 81287.96 | 47276.03 | 2.92 | 99.24  | 39.01 | 1145.1 | 15.03 |
| 2015/7/16 | 50.91 | 50.9  | 81287.96 | 47276.03 | 2.85 | 99.41  | 38.91 | 1143.7 | 14.97 |
| 2015/7/17 | 50.89 | 50.88 | 81287.96 | 47276.03 | 2.87 | 99.44  | 38.9  | 1133.5 | 14.83 |
| 2015/7/20 | 50.15 | 50.11 | 81287.96 | 47276.03 | 2.82 | 99.72  | 39.07 | 1095.1 | 14.65 |
| 2015/7/21 | 50.36 | 50.59 | 81287.96 | 47276.03 | 2.88 | 99.73  | 38.96 | 1101   | 14.83 |
| 2015/7/22 | 49.19 | 49.27 | 81287.96 | 47276.03 | 2.9  | 99.36  | 38.84 | 1091.7 | 14.61 |
| 2015/7/23 | 48.45 | 48.11 | 81287.96 | 47276.03 | 2.82 | 100.02 | 38.53 | 1087.8 | 14.64 |
| 2015/7/24 | 48.14 | 47.98 | 81287.96 | 47276.03 | 2.78 | 100.05 | 38.5  | 1097.5 | 14.67 |
| 2015/7/27 | 47.39 | 47.17 | 81287.96 | 47276.03 | 2.79 | 99.71  | 37.93 | 1093.9 | 14.61 |
| 2015/7/28 | 47.98 | 47.97 | 81287.96 | 47276.03 | 2.82 | 99.39  | 36.98 | 1097.1 | 14.64 |
| 2015/7/29 | 48.79 | 48.77 | 81287.96 | 47276.03 | 2.89 | 99.46  | 37.09 | 1096.9 | 14.67 |
| 2015/7/30 | 48.52 | 48.53 | 81287.96 | 47276.03 | 2.77 | 99.48  | 37.57 | 1087.3 | 14.79 |
| 2015/7/31 | 47.12 | 47.11 | 81287.96 | 47276.03 | 2.72 | 99.33  | 36.82 | 1094.9 | 14.85 |
| 2015/8/3  | 45.17 | 45.25 | 80994.53 | 46262.09 | 2.75 | 99.99  | 35.46 | 1085.3 | 14.5  |
| 2015/8/4  | 45.74 | 45.75 | 80994.53 | 46262.09 | 2.81 | 100.12 | 35.29 | 1087.1 | 14.58 |
| 2015/8/5  | 45.15 | 45.13 | 80994.53 | 46262.09 | 2.8  | 99.91  | 35.38 | 1084.3 | 14.58 |
| 2015/8/6  | 44.66 | 44.69 | 80994.53 | 46262.09 | 2.81 | 100.45 | 34.7  | 1088.9 | 14.58 |
| 2015/8/7  | 43.87 | 43.87 | 80994.53 | 46262.09 | 2.8  | 100.57 | 34.94 | 1093.1 | 14.58 |
| 2015/8/10 | 44.96 | 44.94 | 80994.53 | 46262.09 | 2.84 | 99.97  | 34.67 | 1104.2 | 15.34 |
| 2015/8/11 | 43.08 | 43.11 | 80994.53 | 46262.09 | 2.84 | 100.04 | 35.06 | 1107.8 | 15.24 |
| 2015/8/12 | 43.3  | 43.22 | 80994.53 | 46262.09 | 2.93 | 99.83  | 34.12 | 1123.2 | 15.51 |
| 2015/8/13 | 42.23 | 42.27 | 80994.53 | 46262.09 | 2.79 | 99.83  | 34.6  | 1115   | 15.51 |
| 2015/8/14 | 42.5  | 42.45 | 80994.53 | 46262.09 | 2.8  | 99.63  | 34.13 | 1114.7 | 15.18 |
| 2015/8/17 | 41.87 | 41.93 | 80994.53 | 46262.09 | 2.73 | 99.99  | 33.74 | 1117   | 15.18 |
| 2015/8/18 | 42.62 | 42.58 | 80994.53 | 46262.09 | 2.7  | 99.48  | 33.68 | 1117   | 15.18 |
| 2015/8/19 | 40.8  | 40.75 | 80994.53 | 46262.09 | 2.72 | 99.38  | 33.55 | 1133.6 | 15.18 |
| 2015/8/20 | 41.14 | 41    | 80994.53 | 46262.09 | 2.76 | 99.31  | 32.99 | 1151.7 | 15.51 |
| 2015/8/21 | 40.45 | 40.45 | 80994.53 | 46262.09 | 2.68 | 99.32  | 32.31 | 1160.6 | 15.51 |
| 2015/8/24 | 38.24 | 38.22 | 80994.53 | 46262.09 | 2.65 | 98.94  | 31.15 | 1153.2 | 15.51 |
| 2015/8/25 | 39.31 | 39.15 | 80994.53 | 46262.09 | 2.69 | 99.33  | 31.32 | 1139.7 | 14.66 |
| 2015/8/26 | 38.6  | 38.5  | 80994.53 | 46262.09 | 2.69 | 100.76 | 31.83 | 1124.5 | 14.05 |
| 2015/8/27 | 42.56 | 42.47 | 80994.53 | 46262.09 | 2.64 | 101.14 | 33.11 | 1119.5 | 14.13 |
| 2015/8/28 | 45.22 | 45.29 | 80994.53 | 46262.09 | 2.72 | 101.08 | 33.78 | 1132.5 | 14.57 |
| 2015/8/31 | 49.2  | 49.2  | 80994.53 | 46262.09 | 2.69 | 101.08 | 33.42 | 1134   | 14.58 |
| 2015/9/1  | 45.41 | 45.38 | 80858.11 | 46794.43 | 2.7  | 101.89 | 34.25 | 1138.2 | 14.55 |
| 2015/9/2  | 46.25 | 46.3  | 80858.11 | 46794.43 | 2.65 | 101.92 | 33.68 | 1132.2 | 14.65 |
| 2015/9/3  | 46.75 | 46.75 | 80858.11 | 46794.43 | 2.73 | 102.23 | 33.58 | 1124   | 14.67 |
| 2015/9/4  | 46.05 | 46.02 | 80858.11 | 46794.43 | 2.66 | 102.81 | 33.32 | 1120.7 | 14.57 |
| 2015/9/8  | 45.94 | 45.92 | 80858.11 | 46794.43 | 2.71 | 101.3  | 32.52 | 1119.9 | 14.75 |
| 2015/9/9  | 44.15 | 44.13 | 80858.11 | 46794.43 | 2.65 | 101.51 | 33.01 | 1106.6 | 14.57 |
| 2015/9/10 | 45.92 | 45.85 | 80858.11 | 46794.43 | 2.68 | 100.97 | 32.62 | 1111.1 | 14.66 |
| 2015/9/11 | 44.63 | 44.75 | 80858.11 | 46794.43 | 2.69 | 101.07 | 32.72 | 1103   | 14.47 |
| 2015/9/14 | 44    | 44.07 | 80858.11 | 46794.43 | 2.76 | 101.08 | 32.72 | 1108.4 | 14.36 |
| 2015/9/15 | 44.59 | 44.58 | 80858.11 | 46794.43 | 2.73 | 101.64 | 33.15 | 1103.2 | 14.27 |
| 2015/9/16 | 47.15 | 47.12 | 80858.11 | 46794.43 | 2.66 | 100.64 | 33.96 | 1119.9 | 14.88 |
| 2015/9/17 | 46.9  | 46.93 | 80858.11 | 46794.43 | 2.65 | 100.09 | 33.88 | 1130.5 | 15.21 |
| 2015/9/18 | 44.68 | 44.71 | 80858.11 | 46794.43 | 2.61 | 100.4  | 33.54 | 1138.5 | 15.27 |
| 2015/9/21 | 46.68 | 46.67 | 80858.11 | 46794.43 | 2.57 | 100.56 | 33.41 | 1132.6 | 15.19 |
| 2015/9/22 | 45.83 | 46.17 | 80858.11 | 46794.43 | 2.58 | 101.5  | 33.56 | 1123   | 14.78 |
| 2015/9/23 | 44.48 | 44.53 | 80858.11 | 46794.43 | 2.57 | 102.27 | 33.9  | 1130   | 14.84 |
| 2015/9/24 | 44.91 | 44.94 | 80858.11 | 46794.43 | 2.59 | 102.47 | 33.83 | 1151.5 | 15.11 |
| 2015/9/25 | 45.7  | 45.55 | 80858.11 | 46794.43 | 2.56 | 102.73 | 34.35 | 1147.5 | 15.05 |
| 2015/9/28 | 44.43 | 44.4  | 80858.11 | 46794.43 | 2.56 | 102.79 | 34.41 | 1133.2 | 14.62 |

|            |       |       |          |          |      |        |       |        |       |
|------------|-------|-------|----------|----------|------|--------|-------|--------|-------|
| 2015/9/29  | 45.23 | 45.24 | 80858.11 | 46794.43 | 2.59 | 102.89 | 34.14 | 1126.7 | 14.6  |
| 2015/9/30  | 45.09 | 45.06 | 80858.11 | 46794.43 | 2.52 | 103.1  | 34.26 | 1115.3 | 14.49 |
| 2015/10/1  | 44.74 | 44.75 | 80851.46 | 45659.47 | 2.43 | 103.21 | 34.68 | 1114.2 | 14.47 |
| 2015/10/2  | 45.54 | 45.54 | 80851.46 | 45659.47 | 2.45 | 102.83 | 34.18 | 1138.6 | 15.1  |
| 2015/10/5  | 46.26 | 46.28 | 80851.46 | 45659.47 | 2.45 | 103.08 | 34.18 | 1135.6 | 15.64 |
| 2015/10/6  | 48.53 | 48.53 | 80851.46 | 45659.47 | 2.47 | 102.51 | 34.6  | 1146.4 | 15.99 |
| 2015/10/7  | 47.81 | 47.86 | 80851.46 | 45659.47 | 2.47 | 101.95 | 35.61 | 1145.5 | 15.94 |
| 2015/10/8  | 49.43 | 49.46 | 80851.46 | 45659.47 | 2.5  | 101.75 | 35.74 | 1140.8 | 15.66 |
| 2015/10/9  | 49.63 | 49.67 | 80851.46 | 45659.47 | 2.5  | 101.97 | 36.25 | 1157.1 | 15.82 |
| 2015/10/13 | 46.66 | 46.7  | 80851.46 | 45659.47 | 2.5  | 102.39 | 35.89 | 1166.2 | 15.86 |
| 2015/10/14 | 46.64 | 46.63 | 80851.46 | 45659.47 | 2.52 | 100.84 | 35.34 | 1188.8 | 16.11 |
| 2015/10/15 | 46.38 | 46.38 | 80851.46 | 45659.47 | 2.45 | 100.96 | 35.44 | 1187   | 16.13 |
| 2015/10/16 | 47.26 | 47.3  | 80851.46 | 45659.47 | 2.43 | 101.16 | 35.99 | 1179.9 | 16.13 |
| 2015/10/19 | 45.89 | 45.91 | 80851.46 | 45659.47 | 2.44 | 100.99 | 35.91 | 1169.7 | 15.82 |
| 2015/10/20 | 45.55 | 45.84 | 80851.46 | 45659.47 | 2.48 | 101.11 | 35.48 | 1176   | 15.89 |
| 2015/10/21 | 45.2  | 45.22 | 80851.46 | 45659.47 | 2.4  | 101.3  | 35.29 | 1167.3 | 15.89 |
| 2015/10/22 | 45.38 | 44.9  | 80851.46 | 45659.47 | 2.39 | 101.47 | 35.14 | 1166.8 | 15.89 |
| 2015/10/23 | 44.6  | 43.91 | 80851.46 | 45659.47 | 2.29 | 101.99 | 35.79 | 1164.6 | 15.86 |
| 2015/10/26 | 43.98 | 43.19 | 80851.46 | 45659.47 | 2.06 | 101.73 | 35.61 | 1165.4 | 15.86 |
| 2015/10/27 | 43.2  | 43.21 | 80851.46 | 45659.47 | 2.09 | 102.03 | 35.04 | 1164.5 | 15.85 |
| 2015/10/28 | 45.94 | 45.93 | 80851.46 | 45659.47 | 2.03 | 102.28 | 34.17 | 1182.7 | 16.25 |
| 2015/10/29 | 46.06 | 46.02 | 80851.46 | 45659.47 | 2.26 | 101.99 | 34.86 | 1144.9 | 15.94 |
| 2015/10/30 | 46.59 | 46.6  | 80851.46 | 45659.47 | 2.32 | 101.23 | 34.57 | 1141.8 | 15.53 |
| 2015/11/2  | 46.14 | 46.12 | 81468.31 | 45737.48 | 2.26 | 101.51 | 34.42 | 1132.7 | 15.53 |
| 2015/11/3  | 47.9  | 47.88 | 81468.31 | 45737.48 | 2.25 | 101.45 | 34.42 | 1117.5 | 15.39 |
| 2015/11/4  | 46.32 | 46.32 | 81468.31 | 45737.48 | 2.26 | 101.7  | 34.42 | 1108.1 | 15.2  |
| 2015/11/5  | 45.2  | 45.27 | 81468.31 | 45737.48 | 2.36 | 102.9  | 34.72 | 1104.5 | 15.2  |
| 2015/11/6  | 44.29 | 44.32 | 81468.31 | 45737.48 | 2.37 | 103.98 | 35.06 | 1087.6 | 15.01 |
| 2015/11/9  | 43.87 | 43.87 | 81468.31 | 45737.48 | 2.3  | 103.54 | 34.76 | 1088.2 | 15.01 |
| 2015/11/10 | 44.21 | 44.23 | 81468.31 | 45737.48 | 2.32 | 103.5  | 34.85 | 1091.2 | 15.01 |
| 2015/11/12 | 41.75 | 41.74 | 81468.31 | 45737.48 | 2.26 | 102.72 | 34.1  | 1086.6 | 14.27 |
| 2015/11/13 | 40.74 | 40.69 | 81468.31 | 45737.48 | 2.36 | 102.88 | 33.41 | 1081   | 14.27 |
| 2015/11/16 | 41.74 | 41.68 | 81468.31 | 45737.48 | 2.39 | 102.93 | 33.57 | 1085.4 | 14.19 |
| 2015/11/17 | 40.67 | 40.73 | 81468.31 | 45737.48 | 2.37 | 102.87 | 34.1  | 1068.8 | 14.14 |
| 2015/11/18 | 40.75 | 40.75 | 81468.31 | 45737.48 | 2.35 | 102.73 | 34.4  | 1071   | 14.1  |
| 2015/11/19 | 40.54 | 40.55 | 81468.31 | 45737.48 | 2.28 | 102.34 | 34.18 | 1080.5 | 14.3  |
| 2015/11/20 | 40.39 | 39.39 | 81468.31 | 45737.48 | 2.15 | 103.01 | 34.2  | 1082.9 | 14.3  |
| 2015/11/23 | 41.75 | 39.27 | 81468.31 | 45737.48 | 2.21 | 103.48 | 34.07 | 1068.6 | 14.15 |
| 2015/11/24 | 42.87 | 40.89 | 81468.31 | 45737.48 | 2.2  | 103.75 | 34.14 | 1074.8 | 14.28 |
| 2015/11/25 | 43.04 | 41.22 | 81468.31 | 45737.48 | 2.21 | 103.43 | 34.28 | 1072   | 14.28 |
| 2015/11/27 | 41.71 | 40.57 | 81468.31 | 45737.48 | 2.21 | 104.1  | 33.91 | 1055.9 | 14.02 |
| 2015/11/30 | 41.65 | 40.43 | 81468.31 | 45737.48 | 2.24 | 103.93 | 33.53 | 1064.4 | 14.03 |
| 2015/12/1  | 41.85 | 40.58 | 81689.17 | 48267.14 | 2.23 | 104.11 | 33.61 | 1068.7 | 14.13 |
| 2015/12/2  | 39.94 | 39.93 | 81689.17 | 48267.14 | 2.17 | 105.03 | 33.44 | 1052.1 | 13.96 |
| 2015/12/3  | 41.08 | 41.08 | 81689.17 | 48267.14 | 2.18 | 103.68 | 33.22 | 1062   | 14.04 |
| 2015/12/4  | 39.97 | 40    | 81689.17 | 48267.14 | 2.19 | 103.94 | 32.88 | 1086.8 | 14.54 |
| 2015/12/7  | 37.65 | 37.64 | 81689.17 | 48267.14 | 2.07 | 104.3  | 32.6  | 1071   | 14.2  |
| 2015/12/8  | 37.51 | 37.46 | 81689.17 | 48267.14 | 2.07 | 104.62 | 32.28 | 1074.5 | 14.11 |
| 2015/12/9  | 37.16 | 37.16 | 81689.17 | 48267.14 | 2.06 | 103.43 | 32.3  | 1073.5 | 14.13 |
| 2015/12/10 | 36.76 | 36.76 | 81689.17 | 48267.14 | 2.02 | 103.56 | 32.03 | 1072.6 | 14.08 |
| 2015/12/11 | 35.62 | 35.65 | 81689.17 | 48267.14 | 1.99 | 103.15 | 32.06 | 1076   | 13.89 |
| 2015/12/14 | 36.31 | 36.31 | 81689.17 | 48267.14 | 1.89 | 103.7  | 31.57 | 1060   | 13.75 |
| 2015/12/15 | 37.35 | 37.32 | 81689.17 | 48267.14 | 1.82 | 104.42 | 31.33 | 1061.8 | 13.64 |
| 2015/12/16 | 35.52 | 35.55 | 81689.17 | 48267.14 | 1.79 | 104.68 | 31.77 | 1073.7 | 14.12 |



|            |       |       |          |          |      |        |       |        |       |
|------------|-------|-------|----------|----------|------|--------|-------|--------|-------|
| 2015/12/17 | 34.95 | 34.98 | 81689.17 | 48267.14 | 1.76 | 105.36 | 31.89 | 1051.9 | 13.7  |
| 2015/12/18 | 34.73 | 34.72 | 81689.17 | 48267.14 | 1.77 | 105.44 | 31.63 | 1065.4 | 14.07 |
| 2015/12/21 | 34.74 | 34.55 | 81689.17 | 48267.14 | 1.91 | 105.49 | 31.65 | 1078.5 | 14.3  |
| 2015/12/22 | 36.14 | 36.12 | 81689.17 | 48267.14 | 1.89 | 105.91 | 31.74 | 1073.8 | 14.26 |
| 2015/12/23 | 37.5  | 36.76 | 81689.17 | 48267.14 | 1.98 | 105.6  | 31.95 | 1070   | 14.29 |
| 2015/12/24 | 38.1  | 37.62 | 81689.17 | 48267.14 | 2.03 | 105.32 | 32.48 | 1077.8 | 14.37 |
| 2015/12/28 | 36.81 | 36.36 | 81689.17 | 48267.14 | 2.23 | 105.54 | 31.83 | 1074.3 | 13.86 |
| 2015/12/29 | 37.87 | 37.88 | 81689.17 | 48267.14 | 2.37 | 105.97 | 31.11 | 1079.7 | 14.02 |
| 2015/12/30 | 36.6  | 36.59 | 81689.17 | 48267.14 | 2.21 | 105.94 | 31.14 | 1061   | 13.82 |
| 2015/12/31 | 37.04 | 37.13 | 81689.17 | 48267.14 | 2.34 | 106.56 | 30.53 | 1059.1 | 13.82 |
| 2016/1/4   | 36.76 | 36.81 | 81708.61 | 45861.41 | 2.33 | 105.69 | 30.53 | 1074.5 | 13.85 |
| 2016/1/5   | 35.97 | 35.97 | 81708.61 | 45861.41 | 2.33 | 105.95 | 30.53 | 1079.1 | 13.85 |
| 2016/1/6   | 33.97 | 33.97 | 81708.61 | 45861.41 | 2.27 | 106.29 | 30.53 | 1092.6 | 14    |
| 2016/1/7   | 33.27 | 33.29 | 81708.61 | 45861.41 | 2.38 | 106.4  | 30.53 | 1109   | 14.34 |
| 2016/1/8   | 33.16 | 33.2  | 81708.61 | 45861.41 | 2.47 | 107.13 | 30.53 | 1102   | 13.92 |
| 2016/1/11  | 31.41 | 31.42 | 81708.61 | 45861.41 | 2.4  | 106.93 | 29.89 | 1098   | 14.01 |
| 2016/1/12  | 30.44 | 30.42 | 81708.61 | 45861.41 | 2.26 | 107.61 | 29.69 | 1088.5 | 13.79 |
| 2016/1/13  | 30.48 | 30.42 | 81708.61 | 45861.41 | 2.27 | 107.95 | 29.95 | 1093.9 | 14.1  |
| 2016/1/14  | 31.2  | 31.22 | 81708.61 | 45861.41 | 2.14 | 107.9  | 29.97 | 1079.3 | 14.1  |
| 2016/1/15  | 29.42 | 29.45 | 81708.61 | 45861.41 | 2.1  | 109.06 | 30.01 | 1089.4 | 14.1  |
| 2016/1/19  | 28.46 | 28.47 | 81708.61 | 45861.41 | 2.09 | 109.84 | 29.44 | 1088.7 | 14.07 |
| 2016/1/20  | 26.55 | 26.68 | 81708.61 | 45861.41 | 2.12 | 109.58 | 29.37 | 1109.8 | 14.1  |
| 2016/1/21  | 29.53 | 29.55 | 81708.61 | 45861.41 | 2.14 | 109.35 | 27.91 | 1103   | 14.1  |
| 2016/1/22  | 32.19 | 32.07 | 81708.61 | 45861.41 | 2.14 | 109.04 | 28.76 | 1100.5 | 14.29 |
| 2016/1/25  | 30.34 | 30.31 | 81708.61 | 45861.41 | 2.16 | 109.14 | 29.78 | 1106.1 | 14.1  |
| 2016/1/26  | 31.45 | 29.54 | 81708.61 | 45861.41 | 2.18 | 108.38 | 28.47 | 1119   | 14.39 |
| 2016/1/27  | 32.3  | 32.32 | 81708.61 | 45861.41 | 2.19 | 109.26 | 29.21 | 1115.8 | 14.39 |
| 2016/1/28  | 33.22 | 33.21 | 81708.61 | 45861.41 | 2.18 | 108.3  | 29.94 | 1114.7 | 14.22 |
| 2016/1/29  | 33.62 | 33.66 | 81708.61 | 45861.41 | 2.3  | 109.18 | 30.6  | 1118   | 14.27 |
| 2016/2/1   | 31.62 | 31.62 | 80886.64 | 48261.16 | 2.15 | 107.99 | 30.21 | 1128.6 | 14.37 |
| 2016/2/2   | 29.88 | 29.9  | 80886.64 | 48261.16 | 2.03 | 108.16 | 29.4  | 1129   | 14.26 |
| 2016/2/3   | 32.28 | 32.29 | 80886.64 | 48261.16 | 2.04 | 106.75 | 28.88 | 1143.4 | 14.78 |
| 2016/2/4   | 31.72 | 31.63 | 80886.64 | 48261.16 | 1.97 | 106.82 | 29.48 | 1156.4 | 14.9  |
| 2016/2/5   | 30.89 | 30.86 | 80886.64 | 48261.16 | 2.06 | 107.5  | 29.31 | 1173.9 | 14.73 |
| 2016/2/8   | 29.69 | 29.71 | 80886.64 | 48261.16 | 2.14 | 107.99 | 29.46 | 1191.6 | 15.42 |
| 2016/2/9   | 27.94 | 27.96 | 80886.64 | 48261.16 | 2.1  | 107.71 | 28.97 | 1189.2 | 15.37 |
| 2016/2/10  | 27.45 | 27.54 | 80886.64 | 48261.16 | 2.05 | 107.28 | 28.73 | 1197.7 | 15.3  |
| 2016/2/11  | 26.21 | 26.19 | 80886.64 | 48261.16 | 1.99 | 107.66 | 28.76 | 1246.7 | 15.74 |
| 2016/2/12  | 29.44 | 29.32 | 80886.64 | 48261.16 | 1.97 | 107.42 | 28.62 | 1239   | 15.73 |
| 2016/2/16  | 29.04 | 29.05 | 80886.64 | 48261.16 | 1.9  | 108.94 | 29.86 | 1201   | 15.39 |
| 2016/2/17  | 30.66 | 30.68 | 80886.64 | 48261.16 | 1.94 | 109.02 | 29.65 | 1207.8 | 15.39 |
| 2016/2/18  | 30.77 | 30.77 | 80886.64 | 48261.16 | 1.85 | 108.69 | 30.55 | 1236.8 | 15.39 |
| 2016/2/19  | 29.64 | 29.59 | 80886.64 | 48261.16 | 1.8  | 108.26 | 30.11 | 1228   | 15.39 |
| 2016/2/22  | 31.48 | 31.37 | 80886.64 | 48261.16 | 1.82 | 110.13 | 30.11 | 1208.3 | 15.39 |
| 2016/2/23  | 31.87 | 31.84 | 80886.64 | 48261.16 | 1.78 | 111.18 | 30.11 | 1223.6 | 15.39 |
| 2016/2/24  | 32.15 | 30.35 | 80886.64 | 48261.16 | 1.78 | 111.91 | 30.82 | 1240.7 | 15.39 |
| 2016/2/25  | 33.07 | 31.4  | 80886.64 | 48261.16 | 1.71 | 111.63 | 30.9  | 1241.5 | 15.19 |
| 2016/2/26  | 32.78 | 31.65 | 80886.64 | 48261.16 | 1.79 | 112.36 | 31.35 | 1222.9 | 14.69 |
| 2016/2/29  | 33.75 | 32.74 | 80886.64 | 48261.16 | 1.71 | 112    | 31.26 | 1241   | 14.91 |
| 2016/3/1   | 34.4  | 34.39 | 80824.28 | 47576.34 | 1.74 | 111.68 | 31.85 | 1231.5 | 14.84 |
| 2016/3/2   | 34.66 | 34.57 | 80824.28 | 47576.34 | 1.68 | 110.66 | 32.02 | 1239.6 | 14.97 |
| 2016/3/3   | 34.57 | 34.56 | 80824.28 | 47576.34 | 1.64 | 109.92 | 31.69 | 1265   | 15.27 |
| 2016/3/4   | 35.92 | 35.91 | 80824.28 | 47576.34 | 1.67 | 109.51 | 31.82 | 1260   | 15.54 |
| 2016/3/7   | 37.9  | 37.9  | 80824.28 | 47576.34 | 1.69 | 109.24 | 31.82 | 1266.7 | 15.66 |

|           |       |       |          |          |      |        |       |        |       |
|-----------|-------|-------|----------|----------|------|--------|-------|--------|-------|
| 2016/3/8  | 36.5  | 36.67 | 80824.28 | 47576.34 | 1.71 | 109.63 | 31.82 | 1263.2 | 15.37 |
| 2016/3/9  | 38.29 | 37.62 | 80824.28 | 47576.34 | 1.75 | 109.59 | 32.06 | 1251.9 | 15.29 |
| 2016/3/10 | 37.84 | 37.77 | 80824.28 | 47576.34 | 1.79 | 109.09 | 32.56 | 1271.3 | 15.63 |
| 2016/3/11 | 38.5  | 38.51 | 80824.28 | 47576.34 | 1.82 | 108.3  | 32.82 | 1249.4 | 15.55 |
| 2016/3/14 | 37.18 | 37.2  | 80824.28 | 47576.34 | 1.82 | 108.94 | 32.69 | 1234.5 | 15.37 |
| 2016/3/15 | 36.34 | 36.32 | 80824.28 | 47576.34 | 1.85 | 110.09 | 32.8  | 1229.5 | 15.3  |
| 2016/3/16 | 38.46 | 38.43 | 80824.28 | 47576.34 | 1.87 | 109.32 | 32.85 | 1262.6 | 15.64 |
| 2016/3/17 | 40.2  | 40.17 | 80824.28 | 47576.34 | 1.94 | 107.66 | 33.61 | 1257.6 | 15.92 |
| 2016/3/18 | 39.44 | 39.47 | 80824.28 | 47576.34 | 1.91 | 107.6  | 33.31 | 1257.1 | 15.83 |
| 2016/3/21 | 39.91 | 39.91 | 80824.28 | 47576.34 | 1.83 | 108.43 | 33.25 | 1244.3 | 15.86 |
| 2016/3/22 | 41.45 | 41.45 | 80824.28 | 47576.34 | 1.86 | 109.61 | 33.95 | 1246.7 | 15.89 |
| 2016/3/23 | 39.79 | 38.28 | 80824.28 | 47576.34 | 1.79 | 110.36 | 34.31 | 1218.6 | 15.3  |
| 2016/3/24 | 39.46 | 38.14 | 80824.28 | 47576.34 | 1.81 | 110.09 | 33.92 | 1221.3 | 15.18 |
| 2016/3/28 | 39.39 | 37.99 | 80824.28 | 47576.34 | 1.85 | 109.3  | 34.26 | 1220.4 | 15.2  |
| 2016/3/29 | 38.28 | 36.91 | 80824.28 | 47576.34 | 1.9  | 108.29 | 33.63 | 1217.7 | 15.16 |
| 2016/3/30 | 38.32 | 36.91 | 80824.28 | 47576.34 | 2    | 108.36 | 33.74 | 1225   | 15.23 |
| 2016/3/31 | 38.34 | 36.94 | 80824.28 | 47576.34 | 1.96 | 108.46 | 33.63 | 1233.4 | 15.44 |
| 2016/4/1  | 36.79 | 35.36 | 80028.77 | 47008.7  | 1.96 | 108.98 | 33.99 | 1222.5 | 15.44 |
| 2016/4/4  | 35.7  | 34.3  | 80028.77 | 47008.7  | 2    | 108.7  | 33.57 | 1215.9 | 15.02 |
| 2016/4/5  | 35.89 | 34.52 | 80028.77 | 47008.7  | 1.95 | 109.53 | 33.45 | 1230.6 | 15.02 |
| 2016/4/6  | 37.75 | 37.74 | 80028.77 | 47008.7  | 1.91 | 109.77 | 33.9  | 1223.6 | 15.02 |
| 2016/4/7  | 37.26 | 37.3  | 80028.77 | 47008.7  | 2.02 | 110.35 | 34.34 | 1241   | 15.02 |
| 2016/4/8  | 39.72 | 39.74 | 80028.77 | 47008.7  | 1.99 | 109.77 | 34.39 | 1239.5 | 15.02 |
| 2016/4/11 | 40.36 | 40.46 | 80028.77 | 47008.7  | 1.91 | 108.97 | 34.35 | 1256.4 | 15.8  |
| 2016/4/12 | 42.17 | 42.12 | 80028.77 | 47008.7  | 2    | 108.71 | 34.59 | 1255.9 | 16.15 |
| 2016/4/13 | 41.76 | 41.7  | 80028.77 | 47008.7  | 2.04 | 109.19 | 35.01 | 1243.9 | 16.25 |
| 2016/4/14 | 41.5  | 41.45 | 80028.77 | 47008.7  | 1.97 | 109.6  | 34.89 | 1227.4 | 16.19 |
| 2016/4/15 | 40.36 | 40.4  | 80028.77 | 47008.7  | 1.9  | 109.16 | 35.06 | 1234.2 | 16.17 |
| 2016/4/18 | 39.78 | 39.74 | 80028.77 | 47008.7  | 1.94 | 108.6  | 33.87 | 1232.2 | 16.23 |
| 2016/4/19 | 41.08 | 40.88 | 80028.77 | 47008.7  | 2.09 | 107.75 | 34.88 | 1250.7 | 16.8  |
| 2016/4/20 | 42.63 | 42.72 | 80028.77 | 47008.7  | 2.07 | 108.17 | 34.53 | 1244.7 | 16.94 |
| 2016/4/21 | 43.18 | 43.18 | 80028.77 | 47008.7  | 2.07 | 108.28 | 35.2  | 1249.4 | 16.94 |
| 2016/4/22 | 43.73 | 42.76 | 80028.77 | 47008.7  | 2.14 | 107.61 | 34.46 | 1232   | 16.94 |
| 2016/4/25 | 42.64 | 41.67 | 80028.77 | 47008.7  | 2.06 | 107.07 | 34.1  | 1238.6 | 16.94 |
| 2016/4/26 | 44.04 | 42.52 | 80028.77 | 47008.7  | 2.03 | 106.4  | 33.89 | 1244.2 | 16.94 |
| 2016/4/27 | 45.33 | 45.29 | 80028.77 | 47008.7  | 2    | 106.7  | 34.52 | 1249.5 | 16.94 |
| 2016/4/28 | 46.03 | 46.03 | 80028.77 | 47008.7  | 2.08 | 106.17 | 34.49 | 1270.1 | 17.58 |
| 2016/4/29 | 45.92 | 45.98 | 80028.77 | 47008.7  | 2.18 | 106.16 | 34.87 | 1293.7 | 17.87 |
| 2016/5/2  | 44.78 | 44.75 | 79234.6  | 46079.67 | 2.04 | 105.52 | 34.87 | 1291.4 | 17.54 |
| 2016/5/3  | 43.65 | 43.65 | 79234.6  | 46079.67 | 2.09 | 106.48 | 34.87 | 1287.3 | 17.44 |
| 2016/5/4  | 43.78 | 43.77 | 79234.6  | 46079.67 | 2.14 | 106.73 | 34.1  | 1279.9 | 17.37 |
| 2016/5/5  | 44.32 | 44.33 | 79234.6  | 46079.67 | 2.08 | 106.84 | 34.28 | 1278.1 | 17.35 |
| 2016/5/6  | 44.66 | 44.58 | 79234.6  | 46079.67 | 2.1  | 107.28 | 34.08 | 1289.5 | 17.51 |
| 2016/5/9  | 43.44 | 43.45 | 79234.6  | 46079.67 | 2.1  | 107.38 | 34.08 | 1264.2 | 17.02 |
| 2016/5/10 | 44.66 | 44.68 | 79234.6  | 46079.67 | 2.16 | 107.15 | 34.17 | 1267.4 | 17.12 |
| 2016/5/11 | 46.23 | 46.21 | 79234.6  | 46079.67 | 2.17 | 107.14 | 34.22 | 1272.4 | 17.42 |
| 2016/5/12 | 46.7  | 46.64 | 79234.6  | 46079.67 | 2.16 | 107.15 | 34.87 | 1264.7 | 17.27 |
| 2016/5/13 | 46.21 | 46.22 | 79234.6  | 46079.67 | 2.1  | 107.74 | 34.94 | 1273.4 | 16.99 |
| 2016/5/16 | 47.72 | 47.72 | 79234.6  | 46079.67 | 2.03 | 107.39 | 35.05 | 1275.1 | 17.17 |
| 2016/5/17 | 48.31 | 48.29 | 79234.6  | 46079.67 | 2.05 | 107.01 | 34.98 | 1276.7 | 17.26 |
| 2016/5/18 | 48.19 | 48.12 | 79234.6  | 46079.67 | 2    | 106.01 | 34.83 | 1257.3 | 16.8  |
| 2016/5/19 | 48.16 | 48.16 | 79234.6  | 46079.67 | 2.04 | 105.97 | 33.76 | 1255   | 16.48 |
| 2016/5/20 | 47.75 | 47.67 | 79234.6  | 46079.67 | 2.06 | 106.7  | 33.83 | 1254.2 | 16.47 |
| 2016/5/23 | 48.08 | 48.12 | 79234.6  | 46079.67 | 2.06 | 106.85 | 33.55 | 1249.4 | 16.44 |

|           |       |       |          |          |      |        |       |        |       |
|-----------|-------|-------|----------|----------|------|--------|-------|--------|-------|
| 2016/5/24 | 48.62 | 48.04 | 79234.6  | 46079.67 | 1.98 | 105.83 | 33.55 | 1228.6 | 16.26 |
| 2016/5/25 | 49.56 | 49.1  | 79234.6  | 46079.67 | 1.99 | 105.24 | 33.89 | 1218.7 | 16.34 |
| 2016/5/26 | 49.48 | 49    | 79234.6  | 46079.67 | 1.96 | 105.54 | 34.07 | 1230.6 | 16.35 |
| 2016/5/27 | 49.33 | 49.36 | 79234.6  | 46079.67 | 2.17 | 105.83 | 33.77 | 1212.4 | 16.18 |
| 2016/5/31 | 49.1  | 49.1  | 79234.6  | 46079.67 | 2.29 | 106.84 | 33.91 | 1214.8 | 15.98 |
| 2016/6/1  | 49.01 | 49.07 | 79931.58 | 46628    | 2.38 | 107.23 | 33.88 | 1211.5 | 15.92 |
| 2016/6/3  | 48.62 | 48.69 | 79931.58 | 46628    | 2.4  | 106.49 | 33.83 | 1244.5 | 16.35 |
| 2016/6/6  | 49.69 | 49.71 | 79931.58 | 46628    | 2.47 | 106.95 | 34.38 | 1244.9 | 16.44 |
| 2016/6/7  | 50.36 | 50.37 | 79931.58 | 46628    | 2.47 | 106.29 | 34.37 | 1244.7 | 16.37 |
| 2016/6/8  | 51.23 | 51.23 | 79931.58 | 46628    | 2.47 | 106.49 | 34.73 | 1261.3 | 17.05 |
| 2016/6/9  | 50.56 | 50.52 | 79931.58 | 46628    | 2.62 | 106.88 | 35.42 | 1270.5 | 17.08 |
| 2016/6/10 | 49.07 | 49.09 | 79931.58 | 46628    | 2.56 | 108.44 | 34.95 | 1275.9 | 17.08 |
| 2016/6/13 | 48.88 | 48.89 | 79931.58 | 46628    | 2.59 | 108.79 | 34.95 | 1284.9 | 17.08 |
| 2016/6/14 | 48.49 | 48.49 | 79931.58 | 46628    | 2.6  | 109.52 | 34.96 | 1286.3 | 17.08 |
| 2016/6/15 | 48.01 | 47.92 | 79931.58 | 46628    | 2.6  | 108.86 | 34.92 | 1290.9 | 17.49 |
| 2016/6/16 | 46.21 | 46.14 | 79931.58 | 46628    | 2.58 | 108.76 | 34.96 | 1281.2 | 17.26 |
| 2016/6/17 | 47.98 | 48    | 79931.58 | 46628    | 2.62 | 107.64 | 34.91 | 1300.1 | 17.46 |
| 2016/6/20 | 49.37 | 49.4  | 79931.58 | 46628    | 2.75 | 105.31 | 34.73 | 1291.2 | 17.45 |
| 2016/6/21 | 48.85 | 48.95 | 79931.58 | 46628    | 2.77 | 105.42 | 34.54 | 1266.9 | 17.45 |
| 2016/6/22 | 49.13 | 49.16 | 79931.58 | 46628    | 2.68 | 104.38 | 34.94 | 1265.7 | 17.24 |
| 2016/6/23 | 50.11 | 49.34 | 79931.58 | 46628    | 2.7  | 103.01 | 34.36 | 1256.9 | 17.24 |
| 2016/6/24 | 47.64 | 46.7  | 79931.58 | 46628    | 2.66 | 113.01 | 36.08 | 1316.4 | 17.78 |
| 2016/6/27 | 46.33 | 45.8  | 79931.58 | 46628    | 2.72 | 116.86 | 37.46 | 1326.9 | 17.87 |
| 2016/6/28 | 47.85 | 47.93 | 79931.58 | 46628    | 2.92 | 115.95 | 37.77 | 1314.1 | 17.87 |
| 2016/6/29 | 49.88 | 49.85 | 79931.58 | 46628    | 2.86 | 114.92 | 37.94 | 1318.3 | 18.34 |
| 2016/6/30 | 48.33 | 48.27 | 79931.58 | 46628    | 2.92 | 116.33 | 37.56 | 1323.5 | 18.82 |
| 2016/7/1  | 48.99 | 49.02 | 80649.05 | 46556.77 | 2.99 | 116.66 | 38.12 | 1344   | 19.73 |
| 2016/7/5  | 46.6  | 46.73 | 80649.05 | 46556.77 | 2.76 | 118.88 | 38.37 | 1356.7 | 20    |
| 2016/7/6  | 47.43 | 47.37 | 80649.05 | 46556.77 | 2.79 | 119.73 | 38.81 | 1363.6 | 20.12 |
| 2016/7/7  | 45.14 | 45.22 | 80649.05 | 46556.77 | 2.78 | 119.84 | 39.06 | 1359.9 | 19.72 |
| 2016/7/8  | 45.41 | 45.37 | 80649.05 | 46556.77 | 2.8  | 119.51 | 39.05 | 1365.8 | 20.21 |
| 2016/7/11 | 44.76 | 44.73 | 80649.05 | 46556.77 | 2.7  | 119.14 | 39.25 | 1353.9 | 20.32 |
| 2016/7/12 | 46.8  | 46.82 | 80649.05 | 46556.77 | 2.73 | 116.82 | 38.67 | 1332.4 | 20.19 |
| 2016/7/13 | 44.75 | 44.87 | 80649.05 | 46556.77 | 2.74 | 117.83 | 38.44 | 1336.7 | 20.42 |
| 2016/7/14 | 45.68 | 45.64 | 80649.05 | 46556.77 | 2.73 | 116.15 | 38.6  | 1331.9 | 20.3  |
| 2016/7/15 | 45.95 | 45.93 | 80649.05 | 46556.77 | 2.76 | 117.41 | 38.33 | 1327.2 | 20.1  |
| 2016/7/18 | 45.24 | 45.23 | 80649.05 | 46556.77 | 2.72 | 116.81 | 38.82 | 1328.4 | 20.08 |
| 2016/7/19 | 44.65 | 44.64 | 80649.05 | 46556.77 | 2.73 | 118.19 | 39.05 | 1331.4 | 19.96 |
| 2016/7/20 | 44.94 | 44.96 | 80649.05 | 46556.77 | 2.66 | 116.96 | 39.09 | 1317   | 19.54 |
| 2016/7/21 | 44.75 | 43.96 | 80649.05 | 46556.77 | 2.69 | 117.04 | 38.57 | 1329.5 | 19.54 |
| 2016/7/22 | 44.19 | 43.41 | 80649.05 | 46556.77 | 2.78 | 118.12 | 37.86 | 1322.2 | 19.79 |
| 2016/7/25 | 43.13 | 42.4  | 80649.05 | 46556.77 | 2.75 | 117.84 | 38.07 | 1317.1 | 19.66 |
| 2016/7/26 | 42.92 | 42.16 | 80649.05 | 46556.77 | 2.71 | 117.84 | 37.76 | 1320.3 | 19.66 |
| 2016/7/27 | 41.92 | 41.9  | 80649.05 | 46556.77 | 2.67 | 117.18 | 37.5  | 1326.3 | 19.95 |
| 2016/7/28 | 41.14 | 41.13 | 80649.05 | 46556.77 | 2.87 | 117.65 | 37.18 | 1332.6 | 20.21 |
| 2016/7/29 | 41.6  | 41.54 | 80649.05 | 46556.77 | 2.88 | 117    | 36.75 | 1350.3 | 20.07 |
| 2016/8/1  | 40.06 | 40.05 | 80106.58 | 47909.35 | 2.77 | 117.68 | 37.31 | 1351.5 | 20.5  |
| 2016/8/2  | 39.51 | 39.5  | 80106.58 | 47909.35 | 2.73 | 116.19 | 36.9  | 1362.6 | 20.75 |
| 2016/8/3  | 40.83 | 40.8  | 80106.58 | 47909.35 | 2.84 | 116.45 | 36.62 | 1355.9 | 20.41 |
| 2016/8/4  | 41.93 | 41.92 | 80106.58 | 47909.35 | 2.83 | 118.3  | 36.91 | 1358.3 | 20.42 |
| 2016/8/5  | 41.8  | 41.83 | 80106.58 | 47909.35 | 2.77 | 118.7  | 37.79 | 1334.5 | 20.27 |
| 2016/8/8  | 43.02 | 43.06 | 80106.58 | 47909.35 | 2.75 | 118.93 | 38.34 | 1333.6 | 19.81 |
| 2016/8/9  | 42.77 | 42.78 | 80106.58 | 47909.35 | 2.62 | 119.35 | 38.67 | 1338.7 | 19.81 |
| 2016/8/10 | 41.71 | 41.75 | 80106.58 | 47909.35 | 2.56 | 119.22 | 38.53 | 1344.9 | 20.19 |

|            |       |       |          |          |      |        |       |        |       |
|------------|-------|-------|----------|----------|------|--------|-------|--------|-------|
| 2016/8/11  | 43.49 | 43.51 | 80106.58 | 47909.35 | 2.55 | 119.73 | 38.73 | 1335.4 | 20.19 |
| 2016/8/12  | 44.49 | 44.47 | 80106.58 | 47909.35 | 2.59 | 120.07 | 39.08 | 1333.2 | 19.73 |
| 2016/8/15  | 45.74 | 45.72 | 80106.58 | 47909.35 | 2.59 | 120.43 | 39.26 | 1338.6 | 19.73 |
| 2016/8/16  | 46.58 | 46.57 | 80106.58 | 47909.35 | 2.62 | 118.92 | 39.35 | 1345.3 | 20.06 |
| 2016/8/17  | 46.79 | 46.81 | 80106.58 | 47909.35 | 2.62 | 118.92 | 39.04 | 1347.3 | 19.7  |
| 2016/8/18  | 48.22 | 48.2  | 80106.58 | 47909.35 | 2.67 | 117.86 | 39.17 | 1351.2 | 19.77 |
| 2016/8/19  | 48.52 | 48.48 | 80106.58 | 47909.35 | 2.58 | 118.68 | 38.83 | 1339.9 | 19.37 |
| 2016/8/22  | 47.05 | 46.8  | 80106.58 | 47909.35 | 2.68 | 118.06 | 38.76 | 1337.7 | 18.85 |
| 2016/8/23  | 48.1  | 47.54 | 80106.58 | 47909.35 | 2.76 | 117.5  | 38.1  | 1337.7 | 18.93 |
| 2016/8/24  | 46.77 | 46.29 | 80106.58 | 47909.35 | 2.8  | 117.23 | 38.02 | 1324.8 | 18.54 |
| 2016/8/25  | 47.33 | 46.97 | 80106.58 | 47909.35 | 2.85 | 117.62 | 37.92 | 1321.1 | 18.51 |
| 2016/8/26  | 47.64 | 47.64 | 80106.58 | 47909.35 | 2.87 | 118.08 | 38.04 | 1321.2 | 18.6  |
| 2016/8/29  | 46.98 | 46.97 | 80106.58 | 47909.35 | 2.85 | 118.36 | 38.22 | 1323   | 18.6  |
| 2016/8/30  | 46.35 | 46.32 | 80106.58 | 47909.35 | 2.83 | 118.59 | 38.36 | 1309.2 | 18.57 |
| 2016/8/31  | 44.7  | 44.68 | 80106.58 | 47909.35 | 2.89 | 118.04 | 37.97 | 1306.9 | 18.64 |
| 2016/9/1   | 43.16 | 43.17 | 80425.65 | 47519.56 | 2.79 | 116.8  | 37.98 | 1312.4 | 18.87 |
| 2016/9/2   | 44.44 | 44.39 | 80425.65 | 47519.56 | 2.79 | 116.67 | 37.26 | 1321.6 | 19.39 |
| 2016/9/6   | 44.83 | 44.85 | 80425.65 | 47519.56 | 2.72 | 115.47 | 37.68 | 1347.2 | 20.03 |
| 2016/9/7   | 45.5  | 45.47 | 80425.65 | 47519.56 | 2.68 | 116.28 | 37.76 | 1344.3 | 19.79 |
| 2016/9/8   | 47.62 | 47.63 | 80425.65 | 47519.56 | 2.81 | 116.6  | 38.14 | 1336.7 | 19.6  |
| 2016/9/9   | 45.88 | 45.88 | 80425.65 | 47519.56 | 2.8  | 116.84 | 38.21 | 1328   | 19.03 |
| 2016/9/12  | 46.29 | 46.28 | 80425.65 | 47519.56 | 2.92 | 116.27 | 37.73 | 1320   | 18.95 |
| 2016/9/13  | 44.9  | 44.91 | 80425.65 | 47519.56 | 2.91 | 117.59 | 37.73 | 1317   | 18.82 |
| 2016/9/14  | 43.58 | 43.62 | 80425.65 | 47519.56 | 2.89 | 117.09 | 37.97 | 1322.2 | 18.99 |
| 2016/9/15  | 43.91 | 43.85 | 80425.65 | 47519.56 | 2.93 | 117.1  | 37.76 | 1314.5 | 19.04 |
| 2016/9/16  | 43.03 | 43.04 | 80425.65 | 47519.56 | 2.95 | 119.29 | 37.95 | 1312.6 | 18.81 |
| 2016/9/19  | 43.3  | 43.34 | 80425.65 | 47519.56 | 2.93 | 118.96 | 38.39 | 1312.6 | 19.16 |
| 2016/9/20  | 43.44 | 43.85 | 80425.65 | 47519.56 | 3.05 | 119.42 | 38.69 | 1312.6 | 19.14 |
| 2016/9/21  | 45.34 | 45.33 | 80425.65 | 47519.56 | 3.06 | 118.94 | 38.97 | 1324   | 19.14 |
| 2016/9/22  | 46.32 | 46.1  | 80425.65 | 47519.56 | 2.99 | 118.58 | 39.04 | 1338.2 | 19.91 |
| 2016/9/23  | 44.48 | 44.36 | 80425.65 | 47519.56 | 2.96 | 119.6  | 39.2  | 1338   | 19.76 |
| 2016/9/26  | 45.93 | 45.6  | 80425.65 | 47519.56 | 3    | 119.51 | 39.3  | 1338.1 | 19.56 |
| 2016/9/27  | 44.67 | 44.65 | 80425.65 | 47519.56 | 3    | 119.04 | 39.44 | 1327.4 | 19.12 |
| 2016/9/28  | 47.05 | 47.07 | 80425.65 | 47519.56 | 2.95 | 119.11 | 39.17 | 1325.2 | 19.06 |
| 2016/9/29  | 47.83 | 47.72 | 80425.65 | 47519.56 | 2.96 | 119.58 | 39.64 | 1319.5 | 19.05 |
| 2016/9/30  | 48.24 | 47.72 | 80425.65 | 47519.56 | 2.91 | 119.49 | 39.53 | 1316   | 19.17 |
| 2016/10/3  | 48.81 | 48.8  | 81571.59 | 45732.9  | 2.92 | 120.72 | 40.38 | 1310.3 | 18.8  |
| 2016/10/4  | 48.69 | 48.67 | 81571.59 | 45732.9  | 2.96 | 121.81 | 40.71 | 1267   | 18    |
| 2016/10/5  | 49.83 | 49.75 | 81571.59 | 45732.9  | 3.04 | 121.6  | 40.84 | 1267.5 | 17.65 |
| 2016/10/6  | 50.44 | 50.44 | 81571.59 | 45732.9  | 3.05 | 122.85 | 40.9  | 1253.9 | 17.28 |
| 2016/10/7  | 49.81 | 49.76 | 81571.59 | 45732.9  | 3.19 | 124.67 | 41.86 | 1253.1 | 17.52 |
| 2016/10/11 | 50.79 | 50.72 | 81571.59 | 45732.9  | 3.24 | 127.97 | 42.45 | 1253.8 | 17.65 |
| 2016/10/12 | 50.18 | 50.14 | 81571.59 | 45732.9  | 3.21 | 127.12 | 42.26 | 1253.5 | 17.5  |
| 2016/10/13 | 50.44 | 50.47 | 81571.59 | 45732.9  | 3.34 | 126.57 | 42.15 | 1257.4 | 17.45 |
| 2016/10/14 | 50.35 | 50.35 | 81571.59 | 45732.9  | 3.29 | 127.2  | 42.23 | 1251.6 | 17.36 |
| 2016/10/17 | 49.94 | 49.97 | 81571.59 | 45732.9  | 3.24 | 127.23 | 42.26 | 1255   | 17.42 |
| 2016/10/18 | 50.29 | 50.3  | 81571.59 | 45732.9  | 3.26 | 126.04 | 42.14 | 1261.7 | 17.59 |
| 2016/10/19 | 51.6  | 51.59 | 81571.59 | 45732.9  | 3.17 | 126.18 | 42.16 | 1269.2 | 17.66 |
| 2016/10/20 | 50.43 | 50.31 | 81571.59 | 45732.9  | 3.14 | 126.55 | 42.39 | 1266   | 17.43 |
| 2016/10/21 | 50.85 | 50.61 | 81571.59 | 45732.9  | 2.99 | 126.75 | 42.47 | 1266   | 17.43 |
| 2016/10/24 | 50.52 | 50.18 | 81571.59 | 45732.9  | 2.83 | 126.83 | 42.66 | 1262.3 | 17.43 |
| 2016/10/25 | 49.96 | 49.45 | 81571.59 | 45732.9  | 2.77 | 127.22 | 42.79 | 1274.1 | 17.66 |
| 2016/10/26 | 49.18 | 48.75 | 81571.59 | 45732.9  | 2.73 | 126.68 | 42.71 | 1272   | 17.66 |
| 2016/10/27 | 49.72 | 49.71 | 81571.59 | 45732.9  | 2.76 | 127.43 | 42.07 | 1269.4 | 17.59 |

|            |       |       |          |          |      |        |       |        |       |
|------------|-------|-------|----------|----------|------|--------|-------|--------|-------|
| 2016/10/28 | 48.7  | 48.72 | 81571.59 | 45732.9  | 3.11 | 127.22 | 42.4  | 1276   | 17.77 |
| 2016/10/31 | 46.86 | 46.83 | 81571.59 | 45732.9  | 3.03 | 126.66 | 42.05 | 1273   | 17.81 |
| 2016/11/1  | 46.67 | 46.66 | 82632.03 | 47580.96 | 2.9  | 127.05 | 41.79 | 1287.8 | 18.42 |
| 2016/11/2  | 45.34 | 45.32 | 82632.03 | 47580.96 | 2.79 | 126.44 | 41.63 | 1296.3 | 18.6  |
| 2016/11/3  | 44.66 | 44.66 | 82632.03 | 47580.96 | 2.77 | 124.81 | 41.3  | 1303.1 | 18.33 |
| 2016/11/4  | 44.07 | 44.07 | 82632.03 | 47580.96 | 2.77 | 124.3  | 41.3  | 1296.7 | 18.37 |
| 2016/11/7  | 44.89 | 44.88 | 82632.03 | 47580.96 | 2.82 | 125.47 | 40.86 | 1280.2 | 18.18 |
| 2016/11/8  | 44.98 | 44.96 | 82632.03 | 47580.96 | 2.63 | 125.62 | 40.88 | 1275   | 18.35 |
| 2016/11/9  | 45.27 | 45.2  | 82632.03 | 47580.96 | 2.69 | 125.41 | 40.83 | 1275.3 | 18.41 |
| 2016/11/10 | 44.66 | 44.62 | 82632.03 | 47580.96 | 2.63 | 123.94 | 41.06 | 1253.3 | 18.46 |
| 2016/11/14 | 43.32 | 43.29 | 82632.03 | 47580.96 | 2.75 | 124.59 | 39.35 | 1219.2 | 16.82 |
| 2016/11/15 | 45.81 | 45.86 | 82632.03 | 47580.96 | 2.71 | 124.9  | 39.55 | 1223.9 | 17.05 |
| 2016/11/16 | 45.57 | 45.56 | 82632.03 | 47580.96 | 2.76 | 125.04 | 40.24 | 1225   | 16.93 |
| 2016/11/17 | 45.42 | 45.37 | 82632.03 | 47580.96 | 2.7  | 125.31 | 40.08 | 1211   | 16.93 |
| 2016/11/18 | 45.69 | 45.69 | 82632.03 | 47580.96 | 2.84 | 126.02 | 40.09 | 1207.8 | 16.93 |
| 2016/11/21 | 47.49 | 47.48 | 82632.03 | 47580.96 | 2.95 | 124.53 | 40.77 | 1207.8 | 16.55 |
| 2016/11/22 | 48.03 | 48.07 | 82632.03 | 47580.96 | 2.98 | 125.26 | 40.77 | 1209.9 | 16.55 |
| 2016/11/23 | 47.96 | 46.72 | 82632.03 | 47580.96 | 3.03 | 125.03 | 40.79 | 1187.1 | 16.26 |
| 2016/11/28 | 47.08 | 45.66 | 82632.03 | 47580.96 | 3.23 | 125.28 | 39.89 | 1190.2 | 16.54 |
| 2016/11/29 | 45.23 | 45.29 | 82632.03 | 47580.96 | 3.32 | 124.51 | 40.17 | 1187.1 | 16.59 |
| 2016/11/30 | 49.44 | 49.41 | 82632.03 | 47580.96 | 3.35 | 124.37 | 39.8  | 1172   | 16.49 |
| 2016/12/1  | 51.06 | 51.08 | 82090.58 | 49196.76 | 3.51 | 124.1  | 40.59 | 1171.4 | 16.48 |
| 2016/12/2  | 51.68 | 51.7  | 82090.58 | 49196.76 | 3.44 | 122.73 | 40.06 | 1175.7 | 16.75 |
| 2016/12/5  | 51.79 | 51.72 | 82090.58 | 49196.76 | 3.65 | 122.59 | 39.87 | 1169.5 | 16.73 |
| 2016/12/6  | 50.93 | 50.95 | 82090.58 | 49196.76 | 3.64 | 123.28 | 39.79 | 1167.7 | 16.77 |
| 2016/12/7  | 49.77 | 49.85 | 82090.58 | 49196.76 | 3.6  | 123.79 | 40.2  | 1172.6 | 17.12 |
| 2016/12/8  | 50.84 | 50.84 | 82090.58 | 49196.76 | 3.7  | 124.18 | 40.49 | 1170.6 | 17.01 |
| 2016/12/9  | 51.5  | 51.51 | 82090.58 | 49196.76 | 3.75 | 124.33 | 40.71 | 1158.4 | 16.82 |
| 2016/12/12 | 52.83 | 52.74 | 82090.58 | 49196.76 | 3.51 | 123.24 | 41.79 | 1162.2 | 17.07 |
| 2016/12/13 | 52.98 | 52.99 | 82090.58 | 49196.76 | 3.47 | 123.47 | 41.85 | 1158.3 | 16.86 |
| 2016/12/14 | 51.04 | 51.01 | 82090.58 | 49196.76 | 3.54 | 124.39 | 42.08 | 1142.4 | 16.8  |
| 2016/12/15 | 50.9  | 50.9  | 82090.58 | 49196.76 | 3.54 | 125.8  | 42.01 | 1130.9 | 15.99 |
| 2016/12/16 | 51.9  | 51.93 | 82090.58 | 49196.76 | 3.42 | 125.16 | 42.19 | 1133.2 | 16    |
| 2016/12/19 | 52.12 | 52.13 | 82090.58 | 49196.76 | 3.39 | 126.09 | 42.01 | 1137.9 | 15.98 |
| 2016/12/20 | 52.23 | 52.22 | 82090.58 | 49196.76 | 3.26 | 126.35 | 42.39 | 1131.3 | 16.03 |
| 2016/12/21 | 52.49 | 51.44 | 82090.58 | 49196.76 | 3.54 | 126.47 | 42.94 | 1130.9 | 15.95 |
| 2016/12/22 | 52.95 | 51.98 | 82090.58 | 49196.76 | 3.54 | 127.2  | 43.14 | 1128.5 | 15.79 |
| 2016/12/23 | 53.02 | 52.01 | 82090.58 | 49196.76 | 3.66 | 127.28 | 43.42 | 1132.8 | 15.74 |
| 2016/12/27 | 53.9  | 52.82 | 82090.58 | 49196.76 | 3.76 | 127.36 | 43.39 | 1137.4 | 15.84 |
| 2016/12/28 | 54.06 | 54.01 | 82090.58 | 49196.76 | 3.93 | 127.84 | 43.61 | 1138.1 | 15.97 |
| 2016/12/29 | 53.77 | 53.8  | 82090.58 | 49196.76 | 3.8  | 127.46 | 43.88 | 1156.5 | 16.18 |
| 2016/12/30 | 53.72 | 53.75 | 82090.58 | 49196.76 | 3.72 | 126.41 | 43.48 | 1151.4 | 15.86 |
| 2017/1/3   | 52.33 | 52.36 | 81171.05 | 46513.42 | 3.33 | 126.37 | 43.48 | 1158.7 | 16.44 |
| 2017/1/4   | 53.26 | 53.26 | 81171.05 | 46513.42 | 3.27 | 125.47 | 43.48 | 1162.8 | 16.4  |
| 2017/1/5   | 53.76 | 53.77 | 81171.05 | 46513.42 | 3.27 | 124.51 | 43.48 | 1180.1 | 16.71 |
| 2017/1/6   | 53.99 | 53.98 | 81171.05 | 46513.42 | 3.29 | 125.82 | 43.48 | 1172   | 16.49 |
| 2017/1/9   | 51.96 | 51.95 | 81171.05 | 46513.42 | 3.1  | 127.12 | 43.92 | 1183.2 | 16.66 |
| 2017/1/10  | 50.82 | 50.82 | 81171.05 | 46513.42 | 3.28 | 126.97 | 44.14 | 1184.7 | 16.8  |
| 2017/1/11  | 52.25 | 52.19 | 81171.05 | 46513.42 | 3.22 | 126.58 | 43.82 | 1190   | 16.61 |
| 2017/1/12  | 53.01 | 53.01 | 81171.05 | 46513.42 | 3.39 | 127.1  | 43.9  | 1195.3 | 16.61 |
| 2017/1/13  | 52.37 | 52.36 | 81171.05 | 46513.42 | 3.42 | 126.88 | 44.32 | 1188.1 | 16.61 |
| 2017/1/17  | 52.48 | 52.45 | 81171.05 | 46513.42 | 3.41 | 124.53 | 44.51 | 1214.6 | 16.61 |
| 2017/1/18  | 51.08 | 51.12 | 81171.05 | 46513.42 | 3.3  | 126.09 | 43.92 | 1203.2 | 17.1  |
| 2017/1/19  | 51.37 | 51.39 | 81171.05 | 46513.42 | 3.37 | 125.28 | 43.89 | 1200.2 | 17.1  |

|           |       |       |          |          |      |        |       |        |       |
|-----------|-------|-------|----------|----------|------|--------|-------|--------|-------|
| 2017/1/20 | 52.42 | 52.33 | 81171.05 | 46513.42 | 3.2  | 124.93 | 43.56 | 1210   | 17.12 |
| 2017/1/23 | 52.75 | 52.77 | 81171.05 | 46513.42 | 3.24 | 123.47 | 43.34 | 1210   | 17.19 |
| 2017/1/24 | 53.18 | 52.38 | 81171.05 | 46513.42 | 3.28 | 122.37 | 43.38 | 1207.7 | 17.19 |
| 2017/1/25 | 52.75 | 52.14 | 81171.05 | 46513.42 | 3.33 | 122.37 | 43.29 | 1195.8 | 16.94 |
| 2017/1/26 | 53.78 | 53.24 | 81171.05 | 46513.42 | 3.38 | 122.77 | 42.47 | 1185.6 | 16.9  |
| 2017/1/27 | 53.17 | 53.18 | 81171.05 | 46513.42 | 3.39 | 123.2  | 42.39 | 1188.3 | 16.9  |
| 2017/1/30 | 52.63 | 52.63 | 81171.05 | 46513.42 | 3.23 | 123.82 | 42.48 | 1194.2 | 17.15 |
| 2017/1/31 | 52.81 | 52.75 | 81171.05 | 46513.42 | 3.12 | 122.92 | 42.87 | 1209.3 | 17.56 |
| 2017/2/1  | 53.88 | 53.9  | 81165.97 | 48331.32 | 3.17 | 122.59 | 42.49 | 1209   | 17.59 |
| 2017/2/2  | 53.54 | 53.55 | 81165.97 | 48331.32 | 3.19 | 123.87 | 42.33 | 1214.9 | 17.45 |
| 2017/2/3  | 53.83 | 53.81 | 81165.97 | 48331.32 | 3.06 | 124.27 | 43.33 | 1219.7 | 17.45 |
| 2017/2/6  | 53.01 | 53.01 | 81165.97 | 48331.32 | 3.05 | 124.45 | 44.05 | 1235.2 | 17.73 |
| 2017/2/7  | 52.17 | 52.19 | 81165.97 | 48331.32 | 3.13 | 124.05 | 43.99 | 1233.2 | 17.64 |
| 2017/2/8  | 52.34 | 52.37 | 81165.97 | 48331.32 | 3.13 | 123.74 | 43.3  | 1240.8 | 17.76 |
| 2017/2/9  | 53    | 52.99 | 81165.97 | 48331.32 | 3.14 | 124.19 | 43.47 | 1227.7 | 17.82 |
| 2017/2/10 | 53.86 | 53.84 | 81165.97 | 48331.32 | 3.03 | 124.24 | 43.87 | 1233.3 | 17.94 |
| 2017/2/13 | 52.93 | 52.96 | 81165.97 | 48331.32 | 2.94 | 123.9  | 44.28 | 1225.9 | 17.9  |
| 2017/2/14 | 53.2  | 53.21 | 81165.97 | 48331.32 | 2.91 | 124.46 | 44.53 | 1229   | 17.93 |
| 2017/2/15 | 53.11 | 53.11 | 81165.97 | 48331.32 | 2.93 | 124.53 | 45.54 | 1230.5 | 17.96 |
| 2017/2/16 | 53.36 | 53.41 | 81165.97 | 48331.32 | 2.85 | 124.24 | 45.14 | 1237.8 | 18.05 |
| 2017/2/17 | 53.4  | 53.41 | 81165.97 | 48331.32 | 2.83 | 125.04 | 44.75 | 1234.8 | 18.05 |
| 2017/2/21 | 54.06 | 54.02 | 81165.97 | 48331.32 | 2.56 | 124.39 | 44.82 | 1237.1 | 17.96 |
| 2017/2/22 | 53.59 | 53.61 | 81165.97 | 48331.32 | 2.59 | 124.63 | 44.86 | 1232   | 17.96 |
| 2017/2/23 | 54.45 | 54.48 | 81165.97 | 48331.32 | 2.62 | 123.59 | 44.86 | 1249.7 | 18.11 |
| 2017/2/24 | 53.99 | 53.99 | 81165.97 | 48331.32 | 2.63 | 124.51 | 44.86 | 1256.9 | 18.11 |
| 2017/2/27 | 54.05 | 54.04 | 81165.97 | 48331.32 | 2.69 | 124.71 | 44.82 | 1251.7 | 18.25 |
| 2017/2/28 | 54.01 | 54    | 81165.97 | 48331.32 | 2.77 | 125.32 | 44.82 | 1247.4 | 18.31 |
| 2017/3/1  | 53.83 | 53.82 | 80356.55 | 49145.85 | 2.8  | 126.63 | 44.73 | 1248.3 | 18.41 |
| 2017/3/2  | 52.61 | 52.63 | 80356.55 | 49145.85 | 2.8  | 126.9  | 45    | 1232   | 17.74 |
| 2017/3/3  | 53.33 | 53.33 | 80356.55 | 49145.85 | 2.83 | 126.61 | 44.72 | 1234.1 | 17.94 |
| 2017/3/6  | 53.2  | 53.19 | 80356.55 | 49145.85 | 2.9  | 127.19 | 45.1  | 1225.7 | 17.76 |
| 2017/3/7  | 53.14 | 52.68 | 80356.55 | 49145.85 | 2.82 | 127.58 | 45.4  | 1214.9 | 17.48 |
| 2017/3/8  | 50.28 | 49.83 | 80356.55 | 49145.85 | 2.9  | 127.92 | 45.4  | 1207.9 | 17.21 |
| 2017/3/9  | 49.28 | 48.75 | 80356.55 | 49145.85 | 2.97 | 127.97 | 45.12 | 1203.5 | 16.93 |
| 2017/3/10 | 48.49 | 48.05 | 80356.55 | 49145.85 | 3.01 | 127.96 | 44.85 | 1199.7 | 17.01 |
| 2017/3/13 | 48.4  | 47.95 | 80356.55 | 49145.85 | 3.04 | 127.38 | 44.73 | 1203.5 | 16.94 |
| 2017/3/14 | 47.72 | 47.24 | 80356.55 | 49145.85 | 2.94 | 128.07 | 45.18 | 1205.3 | 16.96 |
| 2017/3/15 | 48.86 | 48.34 | 80356.55 | 49145.85 | 2.98 | 126.65 | 44.67 | 1221.2 | 17.22 |
| 2017/3/16 | 48.75 | 48.3  | 80356.55 | 49145.85 | 2.9  | 125.93 | 45.19 | 1225.7 | 17.29 |
| 2017/3/17 | 48.78 | 48.34 | 80356.55 | 49145.85 | 2.95 | 125.58 | 45.13 | 1230.5 | 17.36 |
| 2017/3/20 | 48.22 | 47.79 | 80356.55 | 49145.85 | 3.04 | 125.96 | 45.38 | 1231.3 | 17.36 |
| 2017/3/21 | 47.34 | 47.02 | 80356.55 | 49145.85 | 3.09 | 124.75 | 45.56 | 1242.3 | 17.53 |
| 2017/3/22 | 48.04 | 47.29 | 80356.55 | 49145.85 | 3.01 | 124.69 | 44.88 | 1247.7 | 17.54 |
| 2017/3/23 | 47.7  | 47    | 80356.55 | 49145.85 | 3.05 | 124.32 | 44.95 | 1246.3 | 17.58 |
| 2017/3/24 | 47.97 | 47.3  | 80356.55 | 49145.85 | 3.08 | 124.8  | 45.05 | 1248.3 | 17.58 |
| 2017/3/27 | 47.73 | 47.02 | 80356.55 | 49145.85 | 3.05 | 123.97 | 45.07 | 1253.8 | 18.1  |
| 2017/3/28 | 48.37 | 48.36 | 80356.55 | 49145.85 | 3.1  | 125.03 | 45.07 | 1255.9 | 18.14 |
| 2017/3/29 | 49.51 | 49.47 | 80356.55 | 49145.85 | 3.18 | 125.19 | 45.61 | 1252.2 | 18.14 |
| 2017/3/30 | 50.35 | 50.3  | 80356.55 | 49145.85 | 3.19 | 124.83 | 46.13 | 1241.5 | 18.25 |
| 2017/3/31 | 50.6  | 50.54 | 80356.55 | 49145.85 | 3.19 | 124.01 | 46.33 | 1247.4 | 18.12 |
| 2017/4/3  | 50.24 | 50.25 | 79928.54 | 47065.51 | 3.13 | 124.78 | 45.94 | 1252.4 | 18.21 |
| 2017/4/4  | 51.03 | 50.99 | 79928.54 | 47065.51 | 3.29 | 125.26 | 45.93 | 1254.4 | 18.21 |
| 2017/4/5  | 51.15 | 51.14 | 79928.54 | 47065.51 | 3.27 | 124.82 | 46.5  | 1255.1 | 18.17 |
| 2017/4/6  | 51.7  | 51.69 | 79928.54 | 47065.51 | 3.33 | 124.95 | 45.93 | 1251.5 | 18.17 |

|           |       |       |          |          |      |        |       |        |       |
|-----------|-------|-------|----------|----------|------|--------|-------|--------|-------|
| 2017/4/7  | 52.24 | 52.25 | 79928.54 | 47065.51 | 3.26 | 125.92 | 45.56 | 1254   | 18.17 |
| 2017/4/10 | 53.08 | 53.06 | 79928.54 | 47065.51 | 3.24 | 125.48 | 45.41 | 1252.9 | 17.78 |
| 2017/4/11 | 53.4  | 53.38 | 79928.54 | 47065.51 | 3.15 | 124.74 | 45.69 | 1272.9 | 18.28 |
| 2017/4/12 | 53.11 | 53.12 | 79928.54 | 47065.51 | 3.19 | 124.24 | 45.55 | 1285.1 | 18.39 |
| 2017/4/13 | 53.18 | 53.19 | 79928.54 | 47065.51 | 3.23 | 124.61 | 45.49 | 1286.3 | 18.5  |
| 2017/4/17 | 52.65 | 52.62 | 79928.54 | 47065.51 | 3.16 | 124    | 45.84 | 1284.3 | 18.44 |
| 2017/4/18 | 52.41 | 52.46 | 79928.54 | 47065.51 | 3.15 | 121.35 | 45.84 | 1290.6 | 18.26 |
| 2017/4/19 | 50.44 | 50.49 | 79928.54 | 47065.51 | 3.19 | 121.94 | 44.89 | 1281.8 | 18.26 |
| 2017/4/20 | 50.27 | 50.26 | 79928.54 | 47065.51 | 3.16 | 121.6  | 44.64 | 1281.4 | 18.26 |
| 2017/4/21 | 49.62 | 49.64 | 79928.54 | 47065.51 | 3.1  | 121.62 | 44.89 | 1285.1 | 17.88 |
| 2017/4/24 | 49.23 | 48.9  | 79928.54 | 47065.51 | 3.07 | 121.75 | 44.95 | 1275.9 | 17.88 |
| 2017/4/25 | 49.56 | 49.22 | 79928.54 | 47065.51 | 3.04 | 121.39 | 45.17 | 1263.3 | 17.57 |
| 2017/4/26 | 49.62 | 49.22 | 79928.54 | 47065.51 | 3.14 | 121.26 | 44.81 | 1262.5 | 17.57 |
| 2017/4/27 | 48.97 | 48.96 | 79928.54 | 47065.51 | 3.24 | 120.74 | 43.99 | 1264.5 | 17.22 |
| 2017/4/28 | 49.33 | 49.31 | 79928.54 | 47065.51 | 3.28 | 120.32 | 43.9  | 1267.2 | 17.16 |
| 2017/5/1  | 48.84 | 48.83 | 80512.56 | 48009.85 | 3.22 | 121.28 | 43.9  | 1256.1 | 16.86 |
| 2017/5/2  | 47.66 | 47.65 | 80512.56 | 48009.85 | 3.2  | 120.78 | 44.05 | 1255.3 | 16.78 |
| 2017/5/3  | 47.82 | 47.79 | 80512.56 | 48009.85 | 3.23 | 121.47 | 43.78 | 1237.8 | 16.43 |
| 2017/5/4  | 45.52 | 45.55 | 80512.56 | 48009.85 | 3.19 | 120.91 | 43.58 | 1226.4 | 16.25 |
| 2017/5/5  | 46.22 | 46.23 | 80512.56 | 48009.85 | 3.27 | 120.39 | 42.69 | 1228   | 16.3  |
| 2017/5/8  | 46.43 | 46.46 | 80512.56 | 48009.85 | 3.17 | 120.78 | 42.69 | 1225.4 | 16.18 |
| 2017/5/9  | 45.88 | 45.84 | 80512.56 | 48009.85 | 3.23 | 120.84 | 42.69 | 1219.7 | 16.13 |
| 2017/5/10 | 47.33 | 47.28 | 80512.56 | 48009.85 | 3.29 | 120.79 | 42.86 | 1217.8 | 16.14 |
| 2017/5/11 | 47.83 | 47.81 | 80512.56 | 48009.85 | 3.38 | 121.27 | 43.74 | 1220   | 16.28 |
| 2017/5/12 | 47.84 | 47.83 | 80512.56 | 48009.85 | 3.42 | 121.25 | 43.96 | 1226.7 | 16.37 |
| 2017/5/15 | 48.85 | 48.86 | 80512.56 | 48009.85 | 3.35 | 121.18 | 44.24 | 1229   | 16.56 |
| 2017/5/16 | 48.66 | 48.64 | 80512.56 | 48009.85 | 3.23 | 120.97 | 44.39 | 1236.1 | 16.78 |
| 2017/5/17 | 49.07 | 49.04 | 80512.56 | 48009.85 | 3.19 | 120.49 | 44.04 | 1259.2 | 16.78 |
| 2017/5/18 | 49.35 | 49.36 | 80512.56 | 48009.85 | 3.18 | 120.75 | 43.32 | 1248.1 | 16.52 |
| 2017/5/19 | 50.33 | 50.32 | 80512.56 | 48009.85 | 3.26 | 119.87 | 43.53 | 1248.1 | 16.78 |
| 2017/5/22 | 50.73 | 50.81 | 80512.56 | 48009.85 | 3.33 | 120.25 | 44.07 | 1255.3 | 17.07 |
| 2017/5/23 | 51.47 | 51.12 | 80512.56 | 48009.85 | 3.22 | 120.57 | 44.01 | 1250.6 | 17.02 |
| 2017/5/24 | 51.36 | 50.99 | 80512.56 | 48009.85 | 3.21 | 120.46 | 44.23 | 1257.8 | 17.08 |
| 2017/5/25 | 48.9  | 48.57 | 80512.56 | 48009.85 | 3.18 | 120.75 | 44.31 | 1256.2 | 17.19 |
| 2017/5/26 | 49.8  | 49.58 | 80512.56 | 48009.85 | 3.24 | 122.03 | 44.24 | 1256.2 | 17.27 |
| 2017/5/30 | 49.66 | 49.63 | 80512.56 | 48009.85 | 3.15 | 121.54 | 44.48 | 1261.7 | 17.36 |
| 2017/5/31 | 48.32 | 48.29 | 80512.56 | 48009.85 | 3.07 | 121.24 | 44.27 | 1267.9 | 17.34 |
| 2017/6/1  | 48.36 | 48.32 | 81042.87 | 48851.97 | 3.01 | 121.22 | 44.13 | 1264.7 | 17.26 |
| 2017/6/2  | 47.66 | 47.68 | 81042.87 | 48851.97 | 3    | 121.12 | 44.04 | 1278.5 | 17.48 |
| 2017/6/5  | 47.4  | 47.4  | 81042.87 | 48851.97 | 2.98 | 121.01 | 44.06 | 1278.4 | 17.52 |
| 2017/6/6  | 48.19 | 48.13 | 81042.87 | 48851.97 | 3.04 | 120.93 | 43.88 | 1293.8 | 17.62 |
| 2017/6/7  | 45.72 | 45.8  | 81042.87 | 48851.97 | 3.02 | 120.47 | 44.03 | 1286.1 | 17.54 |
| 2017/6/8  | 45.64 | 45.68 | 81042.87 | 48851.97 | 3.03 | 120.51 | 43.47 | 1277.3 | 17.31 |
| 2017/6/9  | 45.83 | 45.82 | 81042.87 | 48851.97 | 3.04 | 122.53 | 44.29 | 1266   | 17.17 |
| 2017/6/12 | 46.08 | 46.1  | 81042.87 | 48851.97 | 3.02 | 123.34 | 44.29 | 1264.5 | 17.01 |
| 2017/6/13 | 46.46 | 46.41 | 81042.87 | 48851.97 | 2.97 | 122.43 | 44.43 | 1266.9 | 16.74 |
| 2017/6/14 | 44.73 | 44.79 | 81042.87 | 48851.97 | 2.93 | 122.43 | 44.17 | 1258.6 | 16.97 |
| 2017/6/15 | 44.46 | 44.47 | 81042.87 | 48851.97 | 3.06 | 122.4  | 44    | 1253   | 16.73 |
| 2017/6/16 | 44.74 | 44.73 | 81042.87 | 48851.97 | 3.04 | 122.17 | 43.58 | 1253   | 16.73 |
| 2017/6/19 | 44.2  | 44.24 | 81042.87 | 48851.97 | 2.89 | 122.57 | 43.31 | 1241.9 | 16.53 |
| 2017/6/20 | 43.23 | 43.34 | 81042.87 | 48851.97 | 2.91 | 123.64 | 43.25 | 1241.5 | 16.44 |
| 2017/6/21 | 42.53 | 42.48 | 81042.87 | 48851.97 | 2.89 | 123.22 | 42.48 | 1242   | 16.39 |
| 2017/6/22 | 42.74 | 42.53 | 81042.87 | 48851.97 | 2.89 | 123.11 | 42.19 | 1249.9 | 16.44 |
| 2017/6/23 | 43.01 | 42.86 | 81042.87 | 48851.97 | 2.93 | 122.78 | 42.28 | 1256.2 | 16.66 |

|           |       |       |          |          |      |        |       |        |       |
|-----------|-------|-------|----------|----------|------|--------|-------|--------|-------|
| 2017/6/26 | 43.38 | 43.24 | 81042.87 | 48851.97 | 3.03 | 122.72 | 42.77 | 1244.3 | 16.56 |
| 2017/6/27 | 44.24 | 44.25 | 81042.87 | 48851.97 | 3.04 | 121.84 | 42.82 | 1249   | 16.56 |
| 2017/6/28 | 44.74 | 44.74 | 81042.87 | 48851.97 | 3.07 | 120.79 | 42.09 | 1248.5 | 16.72 |
| 2017/6/29 | 44.93 | 44.88 | 81042.87 | 48851.97 | 3.04 | 120.04 | 41.87 | 1243.4 | 16.57 |
| 2017/6/30 | 46.04 | 46.02 | 81042.87 | 48851.97 | 3.04 | 119.85 | 41.55 | 1239.9 | 16.56 |
| 2017/7/5  | 45.13 | 45.11 | 81587.4  | 47893.19 | 2.84 | 120.69 | 41.72 | 1220.3 | 15.96 |
| 2017/7/6  | 45.52 | 45.52 | 81587.4  | 47893.19 | 2.89 | 120.32 | 41.15 | 1222.4 | 15.96 |
| 2017/7/7  | 44.23 | 44.25 | 81587.4  | 47893.19 | 2.86 | 121.11 | 41    | 1213.2 | 15.48 |
| 2017/7/10 | 44.4  | 44.4  | 81587.4  | 47893.19 | 2.93 | 121.17 | 41.26 | 1210.9 | 15.57 |
| 2017/7/11 | 45.04 | 45.06 | 81587.4  | 47893.19 | 3.05 | 121.49 | 40.94 | 1214.9 | 15.75 |
| 2017/7/12 | 45.49 | 45.48 | 81587.4  | 47893.19 | 2.99 | 121.15 | 41.23 | 1217.9 | 15.86 |
| 2017/7/13 | 46.08 | 46.06 | 81587.4  | 47893.19 | 2.96 | 120.64 | 41.18 | 1216.7 | 15.64 |
| 2017/7/14 | 46.54 | 46.53 | 81587.4  | 47893.19 | 2.98 | 119.15 | 41.35 | 1227.5 | 15.89 |
| 2017/7/17 | 46.02 | 46.02 | 81587.4  | 47893.19 | 3.02 | 119.57 | 41.51 | 1233.4 | 16.05 |
| 2017/7/18 | 46.4  | 46.4  | 81587.4  | 47893.19 | 3.09 | 119.7  | 41.33 | 1241.2 | 16.21 |
| 2017/7/19 | 47.12 | 47.1  | 81587.4  | 47893.19 | 3.07 | 119.85 | 41.57 | 1240.1 | 16.23 |
| 2017/7/20 | 46.79 | 46.73 | 81587.4  | 47893.19 | 3.04 | 120.31 | 41.8  | 1236.8 | 16.25 |
| 2017/7/21 | 45.77 | 45.78 | 81587.4  | 47893.19 | 2.97 | 120.08 | 41.88 | 1251.1 | 16.38 |
| 2017/7/24 | 46.34 | 46.21 | 81587.4  | 47893.19 | 2.9  | 119.81 | 41.31 | 1254.9 | 16.47 |
| 2017/7/25 | 47.89 | 47.77 | 81587.4  | 47893.19 | 2.94 | 119.83 | 41.12 | 1250.7 | 16.41 |
| 2017/7/26 | 48.75 | 48.58 | 81587.4  | 47893.19 | 2.92 | 118.95 | 41.09 | 1247.2 | 16.6  |
| 2017/7/27 | 49.04 | 49.05 | 81587.4  | 47893.19 | 2.97 | 119.47 | 41.11 | 1261.2 | 16.6  |
| 2017/7/28 | 49.71 | 49.72 | 81587.4  | 47893.19 | 2.94 | 118.83 | 41.18 | 1269   | 16.69 |
| 2017/7/31 | 50.17 | 50.21 | 81587.4  | 47893.19 | 2.79 | 118.11 | 41.17 | 1268.6 | 16.78 |
| 2017/8/1  | 49.16 | 49.19 | 80977.3  | 47841.84 | 2.82 | 118.55 | 41.03 | 1268.7 | 16.69 |
| 2017/8/2  | 49.59 | 49.6  | 80977.3  | 47841.84 | 2.81 | 118.37 | 40.43 | 1265.8 | 16.69 |
| 2017/8/3  | 49.03 | 49.03 | 80977.3  | 47841.84 | 2.8  | 119.16 | 40.36 | 1267.8 | 16.69 |
| 2017/8/4  | 49.58 | 49.57 | 80977.3  | 47841.84 | 2.77 | 120.07 | 40.89 | 1258.5 | 16.21 |
| 2017/8/7  | 49.39 | 49.37 | 80977.3  | 47841.84 | 2.8  | 120.1  | 41.39 | 1256.6 | 16.24 |
| 2017/8/8  | 49.17 | 49.07 | 80977.3  | 47841.84 | 2.82 | 120.56 | 41.45 | 1260.5 | 16.42 |
| 2017/8/9  | 49.56 | 49.59 | 80977.3  | 47841.84 | 2.88 | 120.37 | 41.59 | 1277.4 | 16.85 |
| 2017/8/10 | 48.59 | 48.54 | 80977.3  | 47841.84 | 2.99 | 120.63 | 41.75 | 1285.5 | 17.09 |
| 2017/8/11 | 48.82 | 48.81 | 80977.3  | 47841.84 | 2.98 | 120.31 | 41.55 | 1290.2 | 17.08 |
| 2017/8/14 | 47.59 | 47.59 | 80977.3  | 47841.84 | 2.96 | 120.74 | 41.76 | 1281   | 17.04 |
| 2017/8/15 | 47.55 | 47.57 | 80977.3  | 47841.84 | 2.94 | 121.63 | 41.79 | 1270.8 | 16.71 |
| 2017/8/16 | 46.78 | 46.8  | 80977.3  | 47841.84 | 2.89 | 121.42 | 42.3  | 1281.5 | 17.07 |
| 2017/8/17 | 47.09 | 47.07 | 80977.3  | 47841.84 | 2.93 | 121.65 | 42.48 | 1287.2 | 16.99 |
| 2017/8/18 | 48.51 | 48.59 | 80977.3  | 47841.84 | 2.89 | 121.58 | 42.4  | 1286.8 | 16.99 |
| 2017/8/21 | 47.37 | 47.39 | 80977.3  | 47841.84 | 2.96 | 121.34 | 42.6  | 1290.2 | 16.99 |
| 2017/8/22 | 47.64 | 47.65 | 80977.3  | 47841.84 | 2.94 | 122.08 | 42.74 | 1286.2 | 16.99 |
| 2017/8/23 | 48.41 | 48.45 | 80977.3  | 47841.84 | 2.93 | 122.3  | 42.85 | 1289   | 16.99 |
| 2017/8/24 | 47.43 | 47.24 | 80977.3  | 47841.84 | 2.95 | 122.28 | 42.83 | 1285.5 | 17.06 |
| 2017/8/25 | 47.87 | 47.65 | 80977.3  | 47841.84 | 2.89 | 121.51 | 42.8  | 1290.5 | 17.06 |
| 2017/8/28 | 46.57 | 46.4  | 80977.3  | 47841.84 | 2.93 | 121.03 | 42.94 | 1311.3 | 17.06 |
| 2017/8/29 | 46.44 | 46.46 | 80977.3  | 47841.84 | 2.96 | 121.16 | 42.75 | 1314   | 17.06 |
| 2017/8/30 | 45.96 | 45.96 | 80977.3  | 47841.84 | 2.94 | 121.12 | 42.75 | 1306.4 | 17.39 |
| 2017/8/31 | 47.23 | 47.26 | 80977.3  | 47841.84 | 3.04 | 121.04 | 43.16 | 1322.1 | 17.56 |
| 2017/9/1  | 47.29 | 47.32 | 81175.07 | 48326.93 | 3.07 | 120.56 | 43.43 | 1325.1 | 17.72 |
| 2017/9/5  | 48.66 | 48.63 | 81175.07 | 48326.93 | 2.97 | 119.83 | 43.59 | 1336.9 | 17.9  |
| 2017/9/6  | 49.16 | 49.13 | 81175.07 | 48326.93 | 3    | 119.72 | 43.56 | 1333.4 | 17.86 |
| 2017/9/7  | 49.09 | 49.1  | 81175.07 | 48326.93 | 2.98 | 119.19 | 43.67 | 1349   | 18.1  |
| 2017/9/8  | 47.48 | 47.44 | 81175.07 | 48326.93 | 2.89 | 118.33 | 43.49 | 1348.7 | 17.98 |
| 2017/9/11 | 48.07 | 48.06 | 81175.07 | 48326.93 | 2.95 | 118.63 | 43.2  | 1327.3 | 17.77 |
| 2017/9/12 | 48.23 | 48.21 | 81175.07 | 48326.93 | 3    | 117.57 | 43.09 | 1326.4 | 17.87 |



|            |       |       |          |          |      |        |       |        |       |
|------------|-------|-------|----------|----------|------|--------|-------|--------|-------|
| 2017/9/13  | 49.3  | 49.3  | 81175.07 | 48326.93 | 3.06 | 118.21 | 42.48 | 1326.4 | 17.74 |
| 2017/9/14  | 49.89 | 49.86 | 81175.07 | 48326.93 | 3.07 | 116.55 | 42.7  | 1329.3 | 17.77 |
| 2017/9/15  | 49.89 | 49.9  | 81175.07 | 48326.93 | 3.02 | 114.91 | 42.13 | 1321.2 | 17.55 |
| 2017/9/18  | 49.91 | 49.88 | 81175.07 | 48326.93 | 3.15 | 115.71 | 41.74 | 1306.6 | 17.17 |
| 2017/9/19  | 49.48 | 49.54 | 81175.07 | 48326.93 | 3.12 | 115.56 | 41.58 | 1309.6 | 17.27 |
| 2017/9/20  | 50.41 | 50.29 | 81175.07 | 48326.93 | 3.09 | 115.73 | 41.47 | 1299.4 | 17.11 |
| 2017/9/21  | 50.55 | 50.58 | 81175.07 | 48326.93 | 2.95 | 114.96 | 41.43 | 1290.3 | 16.85 |
| 2017/9/22  | 50.66 | 50.33 | 81175.07 | 48326.93 | 2.96 | 115.69 | 41.63 | 1295.7 | 16.94 |
| 2017/9/25  | 52.22 | 51.85 | 81175.07 | 48326.93 | 2.92 | 115.93 | 41.81 | 1309.2 | 17.07 |
| 2017/9/26  | 51.88 | 51.59 | 81175.07 | 48326.93 | 2.92 | 116.03 | 42    | 1298.8 | 16.78 |
| 2017/9/27  | 52.14 | 52.14 | 81175.07 | 48326.93 | 2.97 | 116.66 | 41.99 | 1298.8 | 16.78 |
| 2017/9/28  | 51.56 | 51.62 | 81175.07 | 48326.93 | 3.02 | 116.16 | 41.71 | 1286.6 | 16.83 |
| 2017/9/29  | 51.67 | 51.67 | 81175.07 | 48326.93 | 3.01 | 116.56 | 41.85 | 1282   | 16.59 |
| 2017/10/2  | 50.58 | 50.59 | 81396.08 | 46564.26 | 2.92 | 117.81 | 42.27 | 1270.4 | 16.54 |
| 2017/10/3  | 50.42 | 50.44 | 81396.08 | 46564.26 | 2.9  | 118.14 | 42.3  | 1270.8 | 16.58 |
| 2017/10/4  | 49.98 | 50    | 81396.08 | 46564.26 | 2.94 | 118.05 | 42.48 | 1273.6 | 16.56 |
| 2017/10/5  | 50.79 | 50.79 | 81396.08 | 46564.26 | 2.92 | 119.22 | 42.82 | 1268.3 | 16.56 |
| 2017/10/6  | 49.29 | 49.34 | 81396.08 | 46564.26 | 2.86 | 119.68 | 43.09 | 1271.8 | 16.69 |
| 2017/10/10 | 50.92 | 50.93 | 81396.08 | 46564.26 | 2.89 | 118.46 | 42.53 | 1288   | 17.15 |
| 2017/10/11 | 51.3  | 51.3  | 81396.08 | 46564.26 | 2.89 | 118.28 | 42.55 | 1292   | 17.14 |
| 2017/10/12 | 50.6  | 50.61 | 81396.08 | 46564.26 | 2.99 | 117.92 | 42.58 | 1293.5 | 17.2  |
| 2017/10/13 | 51.45 | 51.43 | 81396.08 | 46564.26 | 3    | 117.72 | 42.43 | 1301.7 | 17.38 |
| 2017/10/16 | 51.87 | 51.86 | 81396.08 | 46564.26 | 2.95 | 118.03 | 42.87 | 1291.9 | 17.28 |
| 2017/10/17 | 51.88 | 51.87 | 81396.08 | 46564.26 | 2.96 | 118.56 | 42.74 | 1284   | 17    |
| 2017/10/18 | 52.04 | 52.05 | 81396.08 | 46564.26 | 2.85 | 118.46 | 43.09 | 1279.2 | 16.97 |
| 2017/10/19 | 51.29 | 51.29 | 81396.08 | 46564.26 | 2.87 | 118.85 | 42.88 | 1286.8 | 17.16 |
| 2017/10/20 | 51.47 | 51.63 | 81396.08 | 46564.26 | 2.92 | 118.59 | 43.09 | 1277.8 | 17    |
| 2017/10/23 | 51.9  | 51.91 | 81396.08 | 46564.26 | 2.99 | 118.51 | 42.99 | 1279.6 | 16.88 |
| 2017/10/24 | 52.47 | 52.32 | 81396.08 | 46564.26 | 2.97 | 119.08 | 42.83 | 1276.3 | 16.95 |
| 2017/10/25 | 52.18 | 51.97 | 81396.08 | 46564.26 | 2.92 | 117.92 | 43.04 | 1275.2 | 16.95 |
| 2017/10/26 | 52.64 | 52.41 | 81396.08 | 46564.26 | 2.89 | 118.84 | 42.57 | 1265.9 | 16.95 |
| 2017/10/27 | 53.9  | 53.92 | 81396.08 | 46564.26 | 2.75 | 119.13 | 42.86 | 1267.7 | 16.95 |
| 2017/10/30 | 54.15 | 54.11 | 81396.08 | 46564.26 | 2.97 | 118.41 | 42.72 | 1273.2 | 16.82 |
| 2017/10/31 | 54.38 | 54.36 | 81396.08 | 46564.26 | 2.9  | 117.74 | 42.46 | 1268.2 | 16.66 |
| 2017/11/1  | 54.3  | 54.32 | 82047.31 | 49308.31 | 2.89 | 118.52 | 42.14 | 1272.5 | 17.06 |
| 2017/11/2  | 54.54 | 54.55 | 82047.31 | 49308.31 | 2.94 | 120.23 | 42.31 | 1272.5 | 17.06 |
| 2017/11/3  | 55.64 | 55.63 | 82047.31 | 49308.31 | 2.98 | 120.07 | 42.78 | 1267.8 | 16.8  |
| 2017/11/6  | 57.35 | 57.34 | 82047.31 | 49308.31 | 3.13 | 119.17 | 42.78 | 1280   | 17.23 |
| 2017/11/7  | 57.2  | 57.19 | 82047.31 | 49308.31 | 3.15 | 119.24 | 42.39 | 1274   | 16.93 |
| 2017/11/8  | 56.81 | 56.82 | 82047.31 | 49308.31 | 3.18 | 119.69 | 41.89 | 1284.9 | 16.93 |
| 2017/11/9  | 57.17 | 57.16 | 82047.31 | 49308.31 | 3.2  | 119.42 | 41.88 | 1286.9 | 16.93 |
| 2017/11/13 | 56.76 | 56.77 | 82047.31 | 49308.31 | 3.17 | 119.71 | 42.1  | 1277   | 17.01 |
| 2017/11/14 | 55.7  | 55.67 | 82047.31 | 49308.31 | 3.1  | 119.27 | 41.69 | 1279.1 | 16.91 |
| 2017/11/15 | 55.33 | 55.28 | 82047.31 | 49308.31 | 3.08 | 119.2  | 41.04 | 1276.5 | 16.94 |
| 2017/11/16 | 55.14 | 55.14 | 82047.31 | 49308.31 | 3.05 | 118.99 | 41.29 | 1277.5 | 16.97 |
| 2017/11/17 | 56.55 | 56.21 | 82047.31 | 49308.31 | 3.1  | 118.79 | 41.3  | 1288.3 | 17.31 |
| 2017/11/20 | 56.09 | 56.21 | 82047.31 | 49308.31 | 3.05 | 118.64 | 41.53 | 1275.9 | 17.31 |
| 2017/11/21 | 56.83 | 56.84 | 82047.31 | 49308.31 | 3.02 | 118.59 | 41.37 | 1275.9 | 16.93 |
| 2017/11/22 | 58.02 | 57.88 | 82047.31 | 49308.31 | 2.97 | 117.83 | 41.7  | 1282.9 | 16.93 |
| 2017/11/27 | 58.11 | 58.1  | 82047.31 | 49308.31 | 2.93 | 117.89 | 41.94 | 1290.3 | 17.02 |
| 2017/11/28 | 57.99 | 57.96 | 82047.31 | 49308.31 | 3.07 | 117.68 | 41.86 | 1290.3 | 17.03 |
| 2017/11/29 | 57.3  | 57.25 | 82047.31 | 49308.31 | 3.18 | 117.08 | 41.64 | 1282.9 | 16.46 |
| 2017/11/30 | 57.4  | 57.4  | 82047.31 | 49308.31 | 3.03 | 116.06 | 41.26 | 1274.3 | 16.37 |
| 2017/12/1  | 58.36 | 58.35 | 81803.94 | 48473.25 | 3.06 | 116.89 | 41.14 | 1279.7 | 16.37 |

|            |       |       |          |          |      |        |       |        |       |
|------------|-------|-------|----------|----------|------|--------|-------|--------|-------|
| 2017/12/4  | 57.47 | 57.48 | 81803.94 | 48473.25 | 2.99 | 116.89 | 41.02 | 1275.7 | 16.27 |
| 2017/12/5  | 57.62 | 57.66 | 81803.94 | 48473.25 | 2.91 | 117.21 | 41.44 | 1265   | 16.03 |
| 2017/12/6  | 55.96 | 55.79 | 81803.94 | 48473.25 | 2.92 | 117.64 | 41.23 | 1262.1 | 15.91 |
| 2017/12/7  | 56.69 | 56.5  | 81803.94 | 48473.25 | 2.76 | 116.93 | 41.04 | 1245.5 | 15.64 |
| 2017/12/8  | 57.36 | 57.15 | 81803.94 | 48473.25 | 2.77 | 117.71 | 40.67 | 1245.9 | 15.73 |
| 2017/12/11 | 57.99 | 57.84 | 81803.94 | 48473.25 | 2.83 | 118.1  | 41.1  | 1241   | 15.65 |
| 2017/12/12 | 57.14 | 57.12 | 81803.94 | 48473.25 | 2.68 | 118.3  | 41.41 | 1242.6 | 15.6  |
| 2017/12/13 | 56.6  | 56.59 | 81803.94 | 48473.25 | 2.72 | 117.42 | 41.33 | 1254.5 | 16    |
| 2017/12/14 | 57.04 | 57    | 81803.94 | 48473.25 | 2.68 | 117.29 | 41.27 | 1254.4 | 15.85 |
| 2017/12/15 | 57.3  | 57.29 | 81803.94 | 48473.25 | 2.61 | 118.27 | 41.16 | 1255.8 | 16    |
| 2017/12/18 | 57.16 | 57.17 | 81803.94 | 48473.25 | 2.75 | 117.73 | 41.55 | 1261.2 | 16.07 |
| 2017/12/19 | 57.46 | 57.49 | 81803.94 | 48473.25 | 2.69 | 117.71 | 41.48 | 1261.9 | 16.08 |
| 2017/12/20 | 58.09 | 58.09 | 81803.94 | 48473.25 | 2.64 | 117.78 | 41.42 | 1266.4 | 16.13 |
| 2017/12/21 | 58.36 | 58.34 | 81803.94 | 48473.25 | 2.6  | 117.7  | 41.59 | 1265.9 | 16.12 |
| 2017/12/22 | 58.47 | 58.25 | 81803.94 | 48473.25 | 2.67 | 117.91 | 41.74 | 1275   | 16.32 |
| 2017/12/26 | 59.97 | 59.55 | 81803.94 | 48473.25 | 2.64 | 117.8  | 42.16 | 1284   | 16.48 |
| 2017/12/27 | 59.64 | 59.67 | 81803.94 | 48473.25 | 2.74 | 117.57 | 42.31 | 1285.5 | 16.63 |
| 2017/12/28 | 59.84 | 59.84 | 81803.94 | 48473.25 | 2.91 | 117.21 | 41.99 | 1293.6 | 16.8  |
| 2017/12/29 | 60.42 | 60.46 | 81803.94 | 48473.25 | 2.95 | 116.65 | 41.91 | 1302.5 | 17.05 |
| 2018/1/2   | 60.37 | 60.37 | 82250.22 | 48351.91 | 3.06 | 114.74 | 41.91 | 1316.6 | 17.13 |
| 2018/1/3   | 61.63 | 61.61 | 82250.22 | 48351.91 | 3.01 | 115.38 | 41.91 | 1312.2 | 17.08 |
| 2018/1/4   | 62.01 | 61.98 | 82250.22 | 48351.91 | 2.88 | 115.08 | 41.91 | 1321.9 | 17.23 |
| 2018/1/5   | 61.44 | 61.49 | 82250.22 | 48351.91 | 2.8  | 114.96 | 41.91 | 1316.5 | 17.23 |
| 2018/1/8   | 61.73 | 61.73 | 82250.22 | 48351.91 | 2.84 | 114.94 | 41.91 | 1318.1 | 17.23 |
| 2018/1/9   | 62.96 | 62.92 | 82250.22 | 48351.91 | 2.92 | 115.17 | 41.83 | 1309.6 | 16.95 |
| 2018/1/10  | 63.57 | 63.6  | 82250.22 | 48351.91 | 2.91 | 115.45 | 42.02 | 1315.3 | 16.95 |
| 2018/1/11  | 63.8  | 63.81 | 82250.22 | 48351.91 | 3.08 | 115.18 | 42.05 | 1319   | 16.93 |
| 2018/1/12  | 64.3  | 64.22 | 82250.22 | 48351.91 | 3.2  | 113.61 | 42.09 | 1338.2 | 17.12 |
| 2018/1/16  | 63.73 | 63.82 | 82250.22 | 48351.91 | 3.13 | 113.1  | 41.54 | 1332.5 | 17.32 |
| 2018/1/17  | 63.97 | 63.92 | 82250.22 | 48351.91 | 3.23 | 112.79 | 41.43 | 1326.9 | 16.97 |
| 2018/1/18  | 63.95 | 63.96 | 82250.22 | 48351.91 | 3.19 | 112.24 | 41.12 | 1327.3 | 16.96 |
| 2018/1/19  | 63.37 | 63.38 | 82250.22 | 48351.91 | 3.19 | 112.6  | 40.98 | 1333   | 16.99 |
| 2018/1/22  | 63.49 | 63.66 | 82250.22 | 48351.91 | 3.22 | 111.51 | 41.06 | 1328.4 | 16.99 |
| 2018/1/23  | 64.47 | 64.45 | 82250.22 | 48351.91 | 3.44 | 111.39 | 41.04 | 1335.9 | 16.99 |
| 2018/1/24  | 65.61 | 65.69 | 82250.22 | 48351.91 | 3.51 | 109.52 | 40.78 | 1357.2 | 16.99 |
| 2018/1/25  | 65.51 | 65.62 | 82250.22 | 48351.91 | 3.45 | 110.31 | 40.52 | 1346.7 | 17.53 |
| 2018/1/26  | 66.14 | 66.27 | 82250.22 | 48351.91 | 3.51 | 110.12 | 40.65 | 1352   | 17.53 |
| 2018/1/29  | 65.56 | 65.71 | 82250.22 | 48351.91 | 3.63 | 110.79 | 40.62 | 1352   | 17.53 |
| 2018/1/30  | 64.5  | 64.64 | 82250.22 | 48351.91 | 3.2  | 110.21 | 40.97 | 1337.5 | 17.06 |
| 2018/1/31  | 64.73 | 64.82 | 82250.22 | 48351.91 | 3    | 109.88 | 40.63 | 1344.4 | 17.21 |
| 2018/2/1   | 65.8  | 65.92 | 82423.14 | 49943.15 | 2.86 | 109.35 | 40.39 | 1349   | 17.21 |
| 2018/2/2   | 65.45 | 65.5  | 82423.14 | 49943.15 | 2.85 | 110.48 | 40.57 | 1329.8 | 17.21 |
| 2018/2/5   | 64.15 | 64.18 | 82423.14 | 49943.15 | 2.75 | 111.74 | 40.52 | 1338.3 | 17.21 |
| 2018/2/6   | 63.39 | 63.48 | 82423.14 | 49943.15 | 2.76 | 111.81 | 40.5  | 1322   | 16.55 |
| 2018/2/7   | 61.79 | 61.91 | 82423.14 | 49943.15 | 2.7  | 112.37 | 40.81 | 1314.6 | 16.63 |
| 2018/2/8   | 61.15 | 61.3  | 82423.14 | 49943.15 | 2.7  | 112.12 | 40.52 | 1317.7 | 16.63 |
| 2018/2/9   | 59.2  | 59.2  | 82423.14 | 49943.15 | 2.58 | 112.81 | 39.91 | 1314.5 | 16.63 |
| 2018/2/12  | 59.29 | 59.41 | 82423.14 | 49943.15 | 2.55 | 112.72 | 40.32 | 1322.2 | 16.35 |
| 2018/2/13  | 59.19 | 59.33 | 82423.14 | 49943.15 | 2.59 | 112.27 | 40.43 | 1329.7 | 16.35 |
| 2018/2/14  | 60.6  | 60.7  | 82423.14 | 49943.15 | 2.59 | 111.42 | 40.5  | 1351.5 | 16.35 |
| 2018/2/15  | 61.34 | 61.48 | 82423.14 | 49943.15 | 2.58 | 110.63 | 40.73 | 1353.2 | 16.35 |
| 2018/2/16  | 61.68 | 61.89 | 82423.14 | 49943.15 | 2.56 | 111.16 | 40.68 | 1347.7 | 16.35 |
| 2018/2/20  | 61.9  | 61.91 | 82423.14 | 49943.15 | 2.62 | 111.45 | 41.05 | 1329   | 16.35 |
| 2018/2/21  | 61.68 | 61.73 | 82423.14 | 49943.15 | 2.66 | 112.08 | 40.97 | 1324.4 | 16.35 |

|           |       |       |          |          |      |        |       |        |       |
|-----------|-------|-------|----------|----------|------|--------|-------|--------|-------|
| 2018/2/22 | 62.77 | 62.72 | 82423.14 | 49943.15 | 2.63 | 111.78 | 41.06 | 1331.4 | 16.57 |
| 2018/2/23 | 63.55 | 63.52 | 82423.14 | 49943.15 | 2.63 | 111.65 | 41.06 | 1329.8 | 16.56 |
| 2018/2/26 | 63.91 | 63.81 | 82423.14 | 49943.15 | 2.64 | 111.7  | 41.24 | 1340.5 | 16.56 |
| 2018/2/27 | 63.01 | 62.94 | 82423.14 | 49943.15 | 2.68 | 112.14 | 41.59 | 1315.7 | 16.35 |
| 2018/2/28 | 61.64 | 61.43 | 82423.14 | 49943.15 | 2.67 | 113.35 | 41.31 | 1318.1 | 16.34 |
| 2018/3/1  | 60.99 | 60.98 | 82165.45 | 49172.61 | 2.7  | 113.08 | 41.6  | 1318.1 | 16.41 |
| 2018/3/2  | 61.25 | 61.19 | 82165.45 | 49172.61 | 2.7  | 112.88 | 41.45 | 1318.9 | 16.46 |
| 2018/3/5  | 62.57 | 62.49 | 82165.45 | 49172.61 | 2.7  | 112.49 | 41.06 | 1319.3 | 16.35 |
| 2018/3/6  | 62.6  | 62.54 | 82165.45 | 49172.61 | 2.75 | 112.17 | 41.35 | 1333.4 | 16.75 |
| 2018/3/7  | 61.15 | 61.09 | 82165.45 | 49172.61 | 2.78 | 112.04 | 41.02 | 1330   | 16.43 |
| 2018/3/8  | 60.12 | 60.13 | 82165.45 | 49172.61 | 2.76 | 112.79 | 41.02 | 1320.9 | 16.43 |
| 2018/3/9  | 62.04 | 62.02 | 82165.45 | 49172.61 | 2.73 | 112.47 | 41.02 | 1321.5 | 16.54 |
| 2018/3/12 | 61.36 | 61.35 | 82165.45 | 49172.61 | 2.78 | 112.03 | 41.16 | 1321.5 | 16.48 |
| 2018/3/13 | 60.71 | 60.69 | 82165.45 | 49172.61 | 2.79 | 111.57 | 40.85 | 1325.3 | 16.52 |
| 2018/3/14 | 60.96 | 60.89 | 82165.45 | 49172.61 | 2.73 | 111.57 | 40.7  | 1324.1 | 16.5  |
| 2018/3/15 | 61.19 | 61.16 | 82165.45 | 49172.61 | 2.68 | 111.78 | 40.55 | 1324.1 | 16.32 |
| 2018/3/16 | 62.34 | 62.29 | 82165.45 | 49172.61 | 2.69 | 111.72 | 40.3  | 1310.1 | 16.23 |
| 2018/3/19 | 62.06 | 62.01 | 82165.45 | 49172.61 | 2.65 | 111.08 | 40.32 | 1316.9 | 16.26 |
| 2018/3/20 | 63.4  | 63.37 | 82165.45 | 49172.61 | 2.68 | 111.29 | 39.86 | 1309   | 16.12 |
| 2018/3/21 | 65.17 | 65.1  | 82165.45 | 49172.61 | 2.64 | 110.16 | 40.04 | 1328.8 | 16.53 |
| 2018/3/22 | 64.3  | 64.25 | 82165.45 | 49172.61 | 2.62 | 110.52 | 40.14 | 1328.8 | 16.51 |
| 2018/3/23 | 65.88 | 65.8  | 82165.45 | 49172.61 | 2.59 | 110.23 | 40.1  | 1348.7 | 16.49 |
| 2018/3/26 | 65.55 | 65.49 | 82165.45 | 49172.61 | 2.62 | 109.47 | 39.97 | 1352.2 | 16.62 |
| 2018/3/27 | 65.25 | 65.21 | 82165.45 | 49172.61 | 2.69 | 110.03 | 39.88 | 1341   | 16.51 |
| 2018/3/28 | 64.38 | 64.3  | 82165.45 | 49172.61 | 2.7  | 110.67 | 39.62 | 1323.8 | 16.21 |
| 2018/3/29 | 64.94 | 64.87 | 82165.45 | 49172.61 | 2.73 | 111.11 | 39.81 | 1325   | 16.21 |
| 2018/4/2  | 63.01 | 63.05 | 81807.24 | 48734.59 | 2.68 | 110.91 | 40.12 | 1340.2 | 16.58 |
| 2018/4/3  | 63.51 | 63.41 | 81807.24 | 48734.59 | 2.7  | 110.78 | 39.9  | 1332.2 | 16.58 |
| 2018/4/4  | 63.37 | 63.35 | 81807.24 | 48734.59 | 2.72 | 110.62 | 39.73 | 1332.7 | 16.45 |
| 2018/4/5  | 63.54 | 63.53 | 81807.24 | 48734.59 | 2.68 | 111.24 | 39.97 | 1325.5 | 16.31 |
| 2018/4/6  | 62.06 | 62.03 | 81807.24 | 48734.59 | 2.7  | 110.54 | 39.91 | 1332.2 | 16.32 |
| 2018/4/9  | 63.42 | 63.4  | 81807.24 | 48734.59 | 2.69 | 110.22 | 39.12 | 1336   | 16.49 |
| 2018/4/10 | 65.51 | 65.48 | 81807.24 | 48734.59 | 2.66 | 109.87 | 36.61 | 1341   | 16.57 |
| 2018/4/11 | 66.82 | 66.81 | 81807.24 | 48734.59 | 2.68 | 109.86 | 35.49 | 1351.7 | 16.57 |
| 2018/4/12 | 67.07 | 67.07 | 81807.24 | 48734.59 | 2.69 | 109.48 | 36.74 | 1334.6 | 16.6  |
| 2018/4/13 | 67.39 | 67.35 | 81807.24 | 48734.59 | 2.74 | 109.39 | 36.83 | 1344.6 | 16.6  |
| 2018/4/16 | 66.22 | 66.23 | 81807.24 | 48734.59 | 2.75 | 108.63 | 36.36 | 1345.4 | 16.6  |
| 2018/4/17 | 66.52 | 66.5  | 81807.24 | 48734.59 | 2.74 | 109    | 36.8  | 1348.1 | 16.6  |
| 2018/4/18 | 68.47 | 68.44 | 81807.24 | 48734.59 | 2.74 | 109.66 | 36.79 | 1351.3 | 17.17 |
| 2018/4/19 | 68.29 | 68.3  | 81807.24 | 48734.59 | 2.66 | 110.59 | 37.42 | 1347.1 | 17.17 |
| 2018/4/20 | 68.38 | 68.26 | 81807.24 | 48734.59 | 2.74 | 111.24 | 37.5  | 1336.2 | 17.1  |
| 2018/4/23 | 68.64 | 67.61 | 81807.24 | 48734.59 | 2.74 | 111.73 | 37.36 | 1324.4 | 16.83 |
| 2018/4/24 | 67.7  | 67.66 | 81807.24 | 48734.59 | 2.78 | 111.43 | 37.62 | 1331.7 | 16.66 |
| 2018/4/25 | 68.05 | 68    | 81807.24 | 48734.59 | 2.79 | 111.8  | 37.52 | 1322   | 16.56 |
| 2018/4/26 | 68.19 | 68.18 | 81807.24 | 48734.59 | 2.82 | 111.94 | 37.09 | 1315.8 | 16.56 |
| 2018/4/27 | 68.1  | 68.11 | 81807.24 | 48734.59 | 2.77 | 112.99 | 37.12 | 1321.7 | 16.47 |
| 2018/4/30 | 68.57 | 68.56 | 81807.24 | 48734.59 | 2.76 | 113.14 | 37.12 | 1313.3 | 16.27 |
| 2018/5/1  | 67.25 | 67.28 | 81602.38 | 48426.61 | 2.8  | 114.36 | 37.12 | 1303.5 | 16.1  |
| 2018/5/2  | 67.93 | 67.91 | 81602.38 | 48426.61 | 2.75 | 114.72 | 37.12 | 1303.7 | 16.42 |
| 2018/5/3  | 68.43 | 68.45 | 81602.38 | 48426.61 | 2.73 | 114.69 | 37.38 | 1303.7 | 16.37 |
| 2018/5/4  | 69.72 | 69.71 | 81602.38 | 48426.61 | 2.71 | 115.07 | 37.72 | 1303.7 | 16.46 |
| 2018/5/7  | 70.73 | 70.74 | 81602.38 | 48426.61 | 2.74 | 114.86 | 38.06 | 1312.5 | 16.42 |
| 2018/5/8  | 69.06 | 68.83 | 81602.38 | 48426.61 | 2.73 | 114.93 | 37.98 | 1308.3 | 16.43 |
| 2018/5/9  | 71.14 | 71.16 | 81602.38 | 48426.61 | 2.74 | 114.94 | 37.98 | 1308.3 | 16.46 |

|           |       |       |          |          |      |        |       |        |       |
|-----------|-------|-------|----------|----------|------|--------|-------|--------|-------|
| 2018/5/10 | 71.36 | 71.36 | 81602.38 | 48426.61 | 2.81 | 115.19 | 38.19 | 1316.7 | 16.68 |
| 2018/5/11 | 70.7  | 70.69 | 81602.38 | 48426.61 | 2.81 | 114.98 | 38.71 | 1316.7 | 16.73 |
| 2018/5/14 | 70.96 | 71.01 | 81602.38 | 48426.61 | 2.84 | 114.84 | 38.52 | 1317.9 | 16.6  |
| 2018/5/15 | 71.31 | 71.34 | 81602.38 | 48426.61 | 2.84 | 115.29 | 38.59 | 1290.3 | 16.22 |
| 2018/5/16 | 71.49 | 71.43 | 81602.38 | 48426.61 | 2.82 | 115.44 | 38.45 | 1288.8 | 16.25 |
| 2018/5/17 | 71.49 | 71.47 | 81602.38 | 48426.61 | 2.86 | 115.21 | 38.64 | 1290.7 | 16.38 |
| 2018/5/18 | 71.28 | 71.23 | 81602.38 | 48426.61 | 2.85 | 115.63 | 38.66 | 1289.6 | 16.41 |
| 2018/5/21 | 72.24 | 72.26 | 81602.38 | 48426.61 | 2.81 | 115.95 | 38.52 | 1292.1 | 16.46 |
| 2018/5/22 | 72.13 | 72.09 | 81602.38 | 48426.61 | 2.91 | 115.91 | 39.15 | 1292.1 | 16.54 |
| 2018/5/23 | 71.84 | 71.85 | 81602.38 | 48426.61 | 2.91 | 116.63 | 39.19 | 1292.1 | 16.29 |
| 2018/5/24 | 70.71 | 70.77 | 81602.38 | 48426.61 | 2.94 | 116.36 | 39.32 | 1292.1 | 16.55 |
| 2018/5/25 | 67.88 | 67.92 | 81602.38 | 48426.61 | 2.94 | 117.06 | 39.27 | 1292.1 | 16.54 |
| 2018/5/29 | 66.73 | 66.8  | 81602.38 | 48426.61 | 2.88 | 117.47 | 39.03 | 1292.1 | 16.4  |
| 2018/5/30 | 68.21 | 68.24 | 81602.38 | 48426.61 | 2.89 | 117.23 | 38.92 | 1300.7 | 16.46 |
| 2018/5/31 | 67.04 | 66.98 | 81602.38 | 48426.61 | 2.95 | 117.12 | 38.9  | 1298   | 16.5  |
| 2018/6/1  | 65.81 | 65.81 | 82248.99 | 47993.16 | 2.96 | 116.46 | 38.95 | 1293   | 16.42 |
| 2018/6/4  | 64.75 | 64.76 | 82248.99 | 47993.16 | 2.93 | 116.77 | 38.88 | 1292.1 | 16.42 |
| 2018/6/5  | 65.52 | 65.51 | 82248.99 | 47993.16 | 2.89 | 116.05 | 38.9  | 1296.3 | 16.5  |
| 2018/6/6  | 64.73 | 64.75 | 82248.99 | 47993.16 | 2.9  | 115.89 | 38.66 | 1296.8 | 16.49 |
| 2018/6/7  | 65.95 | 65.96 | 82248.99 | 47993.16 | 2.93 | 115.82 | 38.65 | 1296.5 | 16.68 |
| 2018/6/8  | 65.74 | 65.77 | 82248.99 | 47993.16 | 2.89 | 115.92 | 38.29 | 1298.6 | 16.75 |
| 2018/6/11 | 66.1  | 66.1  | 82248.99 | 47993.16 | 2.95 | 116.17 | 38.29 | 1299.8 | 16.91 |
| 2018/6/12 | 66.36 | 66.38 | 82248.99 | 47993.16 | 2.94 | 116.25 | 38.29 | 1295.1 | 16.91 |
| 2018/6/13 | 66.64 | 66.63 | 82248.99 | 47993.16 | 2.96 | 116.21 | 38.22 | 1299   | 17.07 |
| 2018/6/14 | 66.89 | 66.91 | 82248.99 | 47993.16 | 2.97 | 117.24 | 38.53 | 1301.6 | 17.2  |
| 2018/6/15 | 65.06 | 65.01 | 82248.99 | 47993.16 | 3.02 | 117.03 | 38.69 | 1278.8 | 16.7  |
| 2018/6/18 | 65.85 | 65.91 | 82248.99 | 47993.16 | 2.95 | 117.35 | 38.29 | 1276.7 | 16.7  |
| 2018/6/19 | 65.07 | 65.09 | 82248.99 | 47993.16 | 2.9  | 118    | 38.07 | 1272.8 | 16.3  |
| 2018/6/20 | 66.22 | 65.92 | 82248.99 | 47993.16 | 2.96 | 118.02 | 38.43 | 1271.5 | 16.3  |
| 2018/6/21 | 65.54 | 65.68 | 82248.99 | 47993.16 | 2.98 | 117.4  | 38.37 | 1268.3 | 16.3  |
| 2018/6/22 | 68.58 | 69.02 | 82248.99 | 47993.16 | 2.95 | 117.18 | 38.26 | 1270   | 16.3  |
| 2018/6/25 | 68.08 | 69.91 | 82248.99 | 47993.16 | 2.92 | 117.06 | 38.53 | 1266.4 | 16.3  |
| 2018/6/26 | 70.53 | 75.23 | 82248.99 | 47993.16 | 2.94 | 117.58 | 38.63 | 1260.3 | 16.3  |
| 2018/6/27 | 72.76 | 77.41 | 82248.99 | 47993.16 | 3    | 118.55 | 38.59 | 1252.3 | 16.3  |
| 2018/6/28 | 73.45 | 73.45 | 82248.99 | 47993.16 | 2.94 | 118.87 | 38.86 | 1245.7 | 15.97 |
| 2018/6/29 | 74.15 | 74.13 | 82248.99 | 47993.16 | 2.92 | 117.68 | 39.06 | 1251.4 | 16.06 |
| 2018/7/2  | 73.94 | 73.89 | 82715.26 | 48404.98 | 2.86 | 118.28 | 38.61 | 1240   | 15.79 |
| 2018/7/3  | 74.14 | 74.19 | 82715.26 | 48404.98 | 2.87 | 117.82 | 38.49 | 1253.2 | 15.94 |
| 2018/7/5  | 72.94 | 73.05 | 82715.26 | 48404.98 | 2.84 | 117.58 | 38.32 | 1256.5 | 15.99 |
| 2018/7/6  | 73.8  | 73.78 | 82715.26 | 48404.98 | 2.86 | 116.99 | 38.37 | 1254.4 | 15.97 |
| 2018/7/9  | 73.85 | 73.93 | 82715.26 | 48404.98 | 2.83 | 117.23 | 38.22 | 1258.1 | 16.09 |
| 2018/7/10 | 74.11 | 74.11 | 82715.26 | 48404.98 | 2.79 | 117.1  | 38.65 | 1254.2 | 16.09 |
| 2018/7/11 | 70.38 | 70.47 | 82715.26 | 48404.98 | 2.83 | 117.71 | 38.91 | 1246.7 | 15.74 |
| 2018/7/12 | 70.33 | 70.28 | 82715.26 | 48404.98 | 2.8  | 117.71 | 39    | 1246.7 | 15.91 |
| 2018/7/13 | 71.01 | 71.03 | 82715.26 | 48404.98 | 2.75 | 117.44 | 39.23 | 1247   | 15.76 |
| 2018/7/16 | 68.06 | 68.22 | 82715.26 | 48404.98 | 2.76 | 117.44 | 38.9  | 1243.8 | 15.73 |
| 2018/7/17 | 68.08 | 68.03 | 82715.26 | 48404.98 | 2.74 | 118.53 | 38.79 | 1243.8 | 15.54 |
| 2018/7/18 | 68.76 | 68.78 | 82715.26 | 48404.98 | 2.72 | 118.93 | 38.98 | 1223.9 | 15.43 |
| 2018/7/19 | 69.46 | 69.42 | 82715.26 | 48404.98 | 2.77 | 119.44 | 38.94 | 1223.1 | 15.3  |
| 2018/7/20 | 70.46 | 70.31 | 82715.26 | 48404.98 | 2.76 | 118.37 | 38.8  | 1223.1 | 15.48 |
| 2018/7/23 | 67.89 | 67.9  | 82715.26 | 48404.98 | 2.72 | 118.65 | 38.61 | 1222   | 15.38 |
| 2018/7/24 | 68.52 | 70.77 | 82715.26 | 48404.98 | 2.73 | 118.26 | 38.91 | 1222   | 15.46 |
| 2018/7/25 | 69.3  | 71.13 | 82715.26 | 48404.98 | 2.78 | 117.84 | 38.65 | 1222   | 15.44 |
| 2018/7/26 | 69.61 | 71.59 | 82715.26 | 48404.98 | 2.78 | 118.57 | 38.65 | 1227.8 | 15.38 |

|            |       |       |          |          |      |        |       |        |       |
|------------|-------|-------|----------|----------|------|--------|-------|--------|-------|
| 2018/7/27  | 68.69 | 68.66 | 82715.26 | 48404.98 | 2.82 | 118.56 | 38.89 | 1227.8 | 15.48 |
| 2018/7/30  | 70.13 | 71.19 | 82715.26 | 48404.98 | 2.8  | 118.44 | 38.95 | 1220.3 | 15.44 |
| 2018/7/31  | 68.76 | 69.88 | 82715.26 | 48404.98 | 2.78 | 118.44 | 39.36 | 1223.1 | 15.52 |
| 2018/8/1   | 67.66 | 68.8  | 83184.84 | 49657.07 | 2.76 | 119.14 | 39.36 | 1214.4 | 15.41 |
| 2018/8/2   | 68.96 | 68.95 | 83184.84 | 49657.07 | 2.82 | 120.14 | 39.06 | 1205.8 | 15.26 |
| 2018/8/3   | 68.49 | 68.49 | 83184.84 | 49657.07 | 2.85 | 120.25 | 39.18 | 1212.6 | 15.46 |
| 2018/8/6   | 69.01 | 69.01 | 83184.84 | 49657.07 | 2.86 | 120.82 | 39.23 | 1206.7 | 15.31 |
| 2018/8/7   | 69.17 | 69.17 | 83184.84 | 49657.07 | 2.9  | 120.86 | 39.2  | 1209.7 | 15.31 |
| 2018/8/8   | 66.94 | 66.92 | 83184.84 | 49657.07 | 2.95 | 121.39 | 39.33 | 1209   | 15.39 |
| 2018/8/9   | 66.81 | 66.81 | 83184.84 | 49657.07 | 2.96 | 121.94 | 37.9  | 1211.8 | 15.39 |
| 2018/8/10  | 67.63 | 67.61 | 83184.84 | 49657.07 | 2.94 | 122.42 | 37.83 | 1210.4 | 15.29 |
| 2018/8/13  | 67.2  | 67.25 | 83184.84 | 49657.07 | 2.93 | 122.5  | 37.07 | 1192.8 | 14.97 |
| 2018/8/14  | 67.04 | 67.04 | 83184.84 | 49657.07 | 2.96 | 122.94 | 37.81 | 1193.6 | 14.97 |
| 2018/8/15  | 65.01 | 65.07 | 83184.84 | 49657.07 | 2.94 | 123.17 | 38.24 | 1177.1 | 14.42 |
| 2018/8/16  | 65.46 | 65.44 | 83184.84 | 49657.07 | 2.91 | 123.01 | 38    | 1180.2 | 14.64 |
| 2018/8/17  | 65.91 | 65.93 | 83184.84 | 49657.07 | 2.95 | 122.65 | 37.94 | 1181.2 | 14.75 |
| 2018/8/20  | 66.43 | 66.5  | 83184.84 | 49657.07 | 2.94 | 122.21 | 37.73 | 1190   | 14.63 |
| 2018/8/21  | 67.35 | 67.32 | 83184.84 | 49657.07 | 2.98 | 121.21 | 37.48 | 1190.5 | 14.63 |
| 2018/8/22  | 67.86 | 67.85 | 83184.84 | 49657.07 | 2.96 | 121.11 | 37.09 | 1196.2 | 14.7  |
| 2018/8/23  | 67.83 | 69.13 | 83184.84 | 49657.07 | 2.96 | 122.03 | 36.63 | 1184.9 | 14.49 |
| 2018/8/24  | 68.72 | 69.71 | 83184.84 | 49657.07 | 2.92 | 121.71 | 37.11 | 1206   | 14.82 |
| 2018/8/27  | 68.87 | 69.97 | 83184.84 | 49657.07 | 2.88 | 121.29 | 37.3  | 1211.4 | 14.82 |
| 2018/8/28  | 68.53 | 68.54 | 83184.84 | 49657.07 | 2.85 | 121.51 | 37.14 | 1202.3 | 14.82 |
| 2018/8/29  | 69.51 | 69.68 | 83184.84 | 49657.07 | 2.9  | 120.04 | 36.8  | 1202.4 | 14.82 |
| 2018/8/30  | 70.25 | 70.25 | 83184.84 | 49657.07 | 2.87 | 120.19 | 36.5  | 1198.6 | 14.46 |
| 2018/8/31  | 69.8  | 69.84 | 83184.84 | 49657.07 | 2.92 | 120.69 | 36.45 | 1200.4 | 14.45 |
| 2018/9/4   | 69.87 | 69.82 | 83200.19 | 48170.35 | 2.82 | 121.62 | 36.81 | 1191.5 | 14.07 |
| 2018/9/5   | 68.72 | 68.69 | 83200.19 | 48170.35 | 2.8  | 121.14 | 36.79 | 1194.6 | 14.13 |
| 2018/9/6   | 67.77 | 67.81 | 83200.19 | 48170.35 | 2.77 | 120.93 | 36.59 | 1198.2 | 14.1  |
| 2018/9/7   | 67.75 | 67.73 | 83200.19 | 48170.35 | 2.78 | 121.05 | 36.13 | 1198.2 | 14.1  |
| 2018/9/10  | 67.54 | 67.55 | 83200.19 | 48170.35 | 2.8  | 120.02 | 35.68 | 1198.2 | 14.15 |
| 2018/9/11  | 69.25 | 69.29 | 83200.19 | 48170.35 | 2.83 | 119.95 | 35.3  | 1196.3 | 13.91 |
| 2018/9/12  | 70.37 | 70.37 | 83200.19 | 48170.35 | 2.83 | 119.83 | 35.56 | 1205   | 14.19 |
| 2018/9/13  | 68.59 | 68.6  | 83200.19 | 48170.35 | 2.82 | 119.3  | 36.05 | 1200   | 14.14 |
| 2018/9/14  | 68.99 | 68.98 | 83200.19 | 48170.35 | 2.77 | 119.63 | 35.99 | 1205.5 | 14.03 |
| 2018/9/17  | 68.91 | 68.86 | 83200.19 | 48170.35 | 2.81 | 118.83 | 36.14 | 1197   | 14.13 |
| 2018/9/18  | 69.85 | 69.87 | 83200.19 | 48170.35 | 2.93 | 118.93 | 36.24 | 1197.6 | 14.1  |
| 2018/9/19  | 71.12 | 71.08 | 83200.19 | 48170.35 | 2.91 | 118.96 | 36.57 | 1197.6 | 14.22 |
| 2018/9/20  | 70.8  | 70.77 | 83200.19 | 48170.35 | 2.98 | 117.83 | 36.78 | 1197.6 | 14.21 |
| 2018/9/21  | 70.78 | 70.8  | 83200.19 | 48170.35 | 2.98 | 119.57 | 36.82 | 1197.6 | 14.32 |
| 2018/9/24  | 72.08 | 73.23 | 83200.19 | 48170.35 | 3.04 | 119.18 | 37.17 | 1197.6 | 14.21 |
| 2018/9/25  | 72.28 | 73.4  | 83200.19 | 48170.35 | 3.08 | 118.61 | 37.32 | 1202.1 | 14.44 |
| 2018/9/26  | 71.57 | 72.22 | 83200.19 | 48170.35 | 3.02 | 118.74 | 37.27 | 1202.1 | 14.33 |
| 2018/9/27  | 72.12 | 72.18 | 83200.19 | 48170.35 | 3.06 | 119.55 | 37.38 | 1181.2 | 14.28 |
| 2018/9/28  | 73.25 | 73.16 | 83200.19 | 48170.35 | 3.01 | 119.99 | 37.61 | 1190.5 | 14.69 |
| 2018/10/1  | 75.3  | 75.37 | 84305.48 | 49682.44 | 3.09 | 119.79 | 37.63 | 1187.2 | 14.52 |
| 2018/10/2  | 75.23 | 75.16 | 84305.48 | 49682.44 | 3.17 | 120.36 | 38    | 1202.6 | 14.72 |
| 2018/10/3  | 76.41 | 76.4  | 84305.48 | 49682.44 | 3.23 | 120.73 | 37.85 | 1196.6 | 14.67 |
| 2018/10/4  | 74.33 | 74.44 | 84305.48 | 49682.44 | 3.17 | 119.98 | 37.47 | 1199   | 14.62 |
| 2018/10/5  | 74.34 | 74.26 | 84305.48 | 49682.44 | 3.14 | 119.13 | 37.08 | 1202.5 | 14.68 |
| 2018/10/8  | 74.29 | 74.27 | 84305.48 | 49682.44 | 3.27 | 119.31 | 36.81 | 1183.7 | 14.4  |
| 2018/10/9  | 74.96 | 74.95 | 84305.48 | 49682.44 | 3.27 | 118.87 | 37.13 | 1189.1 | 14.41 |
| 2018/10/10 | 73.17 | 73.18 | 84305.48 | 49682.44 | 3.28 | 118.43 | 36.95 | 1192   | 14.32 |
| 2018/10/11 | 70.97 | 70.97 | 84305.48 | 49682.44 | 3.22 | 118.09 | 36.54 | 1224.6 | 14.61 |

|            |       |       |          |          |      |        |       |        |       |
|------------|-------|-------|----------|----------|------|--------|-------|--------|-------|
| 2018/10/12 | 71.34 | 71.41 | 84305.48 | 49682.44 | 3.16 | 118.75 | 36.91 | 1219.4 | 14.63 |
| 2018/10/15 | 71.78 | 71.84 | 84305.48 | 49682.44 | 3.24 | 118.76 | 37.31 | 1225.9 | 14.72 |
| 2018/10/16 | 71.92 | 71.93 | 84305.48 | 49682.44 | 3.24 | 118.47 | 37.23 | 1230.1 | 14.69 |
| 2018/10/17 | 69.75 | 69.63 | 84305.48 | 49682.44 | 3.32 | 119.13 | 37.42 | 1225.9 | 14.63 |
| 2018/10/18 | 68.65 | 68.63 | 84305.48 | 49682.44 | 3.2  | 120.02 | 37.37 | 1225.9 | 14.6  |
| 2018/10/19 | 69.12 | 69.16 | 84305.48 | 49682.44 | 3.25 | 119.55 | 37.51 | 1225.9 | 14.65 |
| 2018/10/22 | 69.17 | 69.25 | 84305.48 | 49682.44 | 3.14 | 120.49 | 37.74 | 1221   | 14.58 |
| 2018/10/23 | 66.43 | 66.49 | 84305.48 | 49682.44 | 3.21 | 120.32 | 37.94 | 1231.4 | 14.76 |
| 2018/10/24 | 66.82 | 66.56 | 84305.48 | 49682.44 | 3.17 | 121.28 | 37.89 | 1228.5 | 14.7  |
| 2018/10/25 | 67.33 | 67.25 | 84305.48 | 49682.44 | 3.2  | 121.88 | 37.96 | 1229.6 | 14.66 |
| 2018/10/26 | 67.59 | 67.58 | 84305.48 | 49682.44 | 3.19 | 121.78 | 38.27 | 1234.4 | 14.71 |
| 2018/10/29 | 67.04 | 67    | 84305.48 | 49682.44 | 3.19 | 122.11 | 38.16 | 1234.4 | 14.46 |
| 2018/10/30 | 66.18 | 66.18 | 84305.48 | 49682.44 | 3.19 | 122.93 | 38.3  | 1224.6 | 14.47 |
| 2018/10/31 | 65.31 | 65.31 | 84305.48 | 49682.44 | 3.26 | 122.37 | 38.42 | 1216.1 | 14.25 |
| 2018/11/1  | 63.69 | 63.67 | 84239.96 | 49910.61 | 3.24 | 120.86 | 37.9  | 1235.3 | 14.75 |
| 2018/11/2  | 63.14 | 63.12 | 84239.96 | 49910.61 | 3.28 | 121.22 | 37.56 | 1234.6 | 14.75 |
| 2018/11/5  | 63.1  | 63.12 | 84239.96 | 49910.61 | 3.57 | 120.52 | 37.56 | 1233   | 14.64 |
| 2018/11/6  | 62.21 | 62.16 | 84239.96 | 49910.61 | 3.56 | 119.98 | 37.22 | 1228.5 | 14.53 |
| 2018/11/7  | 61.67 | 61.69 | 84239.96 | 49910.61 | 3.56 | 119.73 | 36.97 | 1227.8 | 14.57 |
| 2018/11/8  | 60.67 | 60.71 | 84239.96 | 49910.61 | 3.54 | 120.34 | 36.91 | 1224.7 | 14.42 |
| 2018/11/9  | 60.19 | 60.19 | 84239.96 | 49910.61 | 3.72 | 121.16 | 36.9  | 1210.3 | 14.13 |
| 2018/11/12 | 59.93 | 59.85 | 84239.96 | 49910.61 | 3.79 | 122.31 | 37    | 1200.8 | 13.97 |
| 2018/11/13 | 55.69 | 55.63 | 84239.96 | 49910.61 | 4.1  | 121.2  | 36.8  | 1202.8 | 13.97 |
| 2018/11/14 | 56.25 | 56.16 | 84239.96 | 49910.61 | 4.84 | 120.99 | 36.4  | 1211.4 | 14.11 |
| 2018/11/15 | 56.46 | 56.45 | 84239.96 | 49910.61 | 4.04 | 123.04 | 37.14 | 1213.9 | 14.27 |
| 2018/11/16 | 56.46 | 56.49 | 84239.96 | 49910.61 | 4.27 | 122.51 | 37.95 | 1222   | 14.39 |
| 2018/11/19 | 56.76 | 57.16 | 84239.96 | 49910.61 | 4.7  | 122.31 | 37.82 | 1224.8 | 14.41 |
| 2018/11/20 | 53.43 | 53.39 | 84239.96 | 49910.61 | 4.52 | 122.92 | 38.04 | 1222   | 14.3  |
| 2018/11/21 | 54.63 | 54.41 | 84239.96 | 49910.61 | 4.45 | 123.02 | 38    | 1226.7 | 14.49 |
| 2018/11/26 | 51.63 | 51.46 | 84239.96 | 49910.61 | 4.25 | 122.73 | 37.62 | 1222.3 | 14.19 |
| 2018/11/27 | 51.56 | 51.31 | 84239.96 | 49910.61 | 4.26 | 123.37 | 37.73 | 1214.5 | 14.1  |
| 2018/11/28 | 50.29 | 50.06 | 84239.96 | 49910.61 | 4.72 | 122.58 | 37.64 | 1221.1 | 14.29 |
| 2018/11/29 | 51.45 | 51.46 | 84239.96 | 49910.61 | 4.65 | 122.92 | 37.59 | 1224.1 | 14.25 |
| 2018/11/30 | 50.93 | 50.78 | 84239.96 | 49910.61 | 4.61 | 123.25 | 37.67 | 1222.1 | 14.14 |
| 2018/12/3  | 52.95 | 52.98 | 83944.81 | 50309.59 | 4.34 | 124.05 | 37.57 | 1230.2 | 14.33 |
| 2018/12/4  | 53.25 | 53.21 | 83944.81 | 50309.59 | 4.46 | 124.14 | 37.63 | 1238.5 | 14.49 |
| 2018/12/5  | 52.89 | 52.64 | 83944.81 | 50309.59 | 4.47 | 123.95 | 37.52 | 1237.3 | 14.47 |
| 2018/12/6  | 51.49 | 51.54 | 83944.81 | 50309.59 | 4.33 | 123.46 | 37.59 | 1237.2 | 14.39 |
| 2018/12/7  | 52.61 | 52.76 | 83944.81 | 50309.59 | 4.49 | 123.98 | 37.35 | 1249.4 | 14.57 |
| 2018/12/10 | 51    | 51.07 | 83944.81 | 50309.59 | 4.55 | 125.65 | 37.82 | 1244.5 | 14.51 |
| 2018/12/11 | 51.65 | 51.65 | 83944.81 | 50309.59 | 4.41 | 126.39 | 38.03 | 1243   | 14.53 |
| 2018/12/12 | 51.15 | 51.04 | 83944.81 | 50309.59 | 4.14 | 124.98 | 38.31 | 1245   | 14.71 |
| 2018/12/13 | 52.58 | 52.69 | 83944.81 | 50309.59 | 4.12 | 124.69 | 37.98 | 1242.7 | 14.73 |
| 2018/12/14 | 51.2  | 51.26 | 83944.81 | 50309.59 | 3.83 | 125.39 | 38.08 | 1238   | 14.49 |
| 2018/12/17 | 49.88 | 49.8  | 83944.81 | 50309.59 | 3.53 | 125.12 | 37.99 | 1245.9 | 14.62 |
| 2018/12/18 | 46.24 | 46.12 | 83944.81 | 50309.59 | 3.84 | 124.86 | 37.73 | 1249   | 14.61 |
| 2018/12/19 | 47.2  | 47.96 | 83944.81 | 50309.59 | 3.73 | 125.16 | 37.49 | 1255.8 | 14.61 |
| 2018/12/20 | 45.88 | 45.64 | 83944.81 | 50309.59 | 3.58 | 124.69 | 37.37 | 1260.5 | 14.72 |
| 2018/12/21 | 45.59 | 45.38 | 83944.81 | 50309.59 | 3.82 | 124.97 | 36.93 | 1255   | 14.72 |
| 2018/12/26 | 46.22 | 46.04 | 83944.81 | 50309.59 | 3.54 | 124.93 | 36.44 | 1277.4 | 14.98 |
| 2018/12/27 | 44.61 | 44.48 | 83944.81 | 50309.59 | 3.64 | 124.82 | 36.56 | 1276.7 | 14.98 |
| 2018/12/28 | 45.33 | 45.15 | 83944.81 | 50309.59 | 3.3  | 124.3  | 36.24 | 1283.4 | 15.31 |
| 2019/1/2   | 46.54 | 46.31 | 82476.34 | 49406.01 | 2.96 | 124.01 | 36.24 | 1286.5 | 15.47 |
| 2019/1/3   | 47.09 | 46.92 | 82476.34 | 49406.01 | 2.95 | 123.73 | 36.24 | 1296.2 | 15.47 |

|           |       |       |          |          |      |        |       |        |       |
|-----------|-------|-------|----------|----------|------|--------|-------|--------|-------|
| 2019/1/4  | 47.96 | 47.76 | 82476.34 | 49406.01 | 3.04 | 122.86 | 36.24 | 1286.2 | 15.64 |
| 2019/1/7  | 48.52 | 48.27 | 82476.34 | 49406.01 | 2.94 | 122.36 | 36.24 | 1290.3 | 15.75 |
| 2019/1/8  | 49.78 | 49.58 | 82476.34 | 49406.01 | 2.97 | 122.99 | 36.24 | 1286.2 | 15.75 |
| 2019/1/9  | 52.36 | 52.19 | 82476.34 | 49406.01 | 2.98 | 122.26 | 36.61 | 1294.7 | 15.68 |
| 2019/1/10 | 52.59 | 52.42 | 82476.34 | 49406.01 | 2.97 | 122.63 | 36.72 | 1287.1 | 15.68 |
| 2019/1/11 | 51.59 | 51.44 | 82476.34 | 49406.01 | 3.1  | 121.78 | 36.76 | 1287.9 | 15.58 |
| 2019/1/14 | 50.51 | 50.31 | 82476.34 | 49406.01 | 3.59 | 121.52 | 36.33 | 1291.8 | 15.62 |
| 2019/1/15 | 52.11 | 51.8  | 82476.34 | 49406.01 | 3.5  | 121.58 | 36.28 | 1289.4 | 15.56 |
| 2019/1/16 | 52.31 | 52.08 | 82476.34 | 49406.01 | 3.38 | 121.4  | 36.41 | 1293.5 | 15.6  |
| 2019/1/17 | 52.07 | 51.83 | 82476.34 | 49406.01 | 3.41 | 120.41 | 36.69 | 1291.6 | 15.49 |
| 2019/1/18 | 53.8  | 53.6  | 82476.34 | 49406.01 | 3.48 | 121.45 | 36.46 | 1281.3 | 15.29 |
| 2019/1/21 | 53.8  | 51.83 | 82476.34 | 49406.01 | 3.48 | 121.28 | 36.71 | 1281.3 | 15.29 |
| 2019/1/22 | 52.57 | 52.59 | 82476.34 | 49406.01 | 3.04 | 120.68 | 36.58 | 1284.7 | 15.3  |
| 2019/1/23 | 52.62 | 52.44 | 82476.34 | 49406.01 | 2.98 | 119.64 | 36.43 | 1281.9 | 15.29 |
| 2019/1/24 | 53.13 | 52.94 | 82476.34 | 49406.01 | 3.1  | 119.69 | 36.38 | 1280.1 | 15.27 |
| 2019/1/25 | 53.69 | 53.53 | 82476.34 | 49406.01 | 3.18 | 118.47 | 36.31 | 1302.5 | 15.25 |
| 2019/1/28 | 51.99 | 51.79 | 82476.34 | 49406.01 | 2.91 | 118.84 | 36.09 | 1302.5 | 15.7  |
| 2019/1/29 | 53.31 | 53.07 | 82476.34 | 49406.01 | 2.95 | 119.65 | 35.89 | 1310.4 | 15.7  |
| 2019/1/30 | 54.23 | 54.18 | 82476.34 | 49406.01 | 2.85 | 119.23 | 36.2  | 1319.5 | 16.08 |
| 2019/1/31 | 53.79 | 53.84 | 82476.34 | 49406.01 | 2.81 | 119.27 | 36.47 | 1319.8 | 16.07 |
| 2019/2/1  | 55.26 | 55.29 | 82389.07 | 50988.58 | 2.73 | 119.58 | 36.43 | 1317.4 | 15.91 |
| 2019/2/4  | 54.56 | 54.57 | 82389.07 | 50988.58 | 2.66 | 120    | 36.52 | 1311.5 | 15.87 |
| 2019/2/5  | 53.66 | 53.69 | 82389.07 | 50988.58 | 2.66 | 120.86 | 36.66 | 1314.1 | 15.86 |
| 2019/2/6  | 54.01 | 53.94 | 82389.07 | 50988.58 | 2.66 | 121    | 36.83 | 1305.5 | 15.67 |
| 2019/2/7  | 52.64 | 52.68 | 82389.07 | 50988.58 | 2.55 | 120.79 | 36.75 | 1308.7 | 15.74 |
| 2019/2/8  | 52.72 | 52.75 | 82389.07 | 50988.58 | 2.58 | 120.83 | 36.67 | 1313.3 | 15.83 |
| 2019/2/11 | 52.41 | 52.43 | 82389.07 | 50988.58 | 2.64 | 121.64 | 36.94 | 1306.1 | 15.7  |
| 2019/2/12 | 53.1  | 53.14 | 82389.07 | 50988.58 | 2.69 | 121.31 | 37.06 | 1309.6 | 15.69 |
| 2019/2/13 | 53.9  | 53.84 | 82389.07 | 50988.58 | 2.58 | 121.78 | 36.98 | 1308.1 | 15.55 |
| 2019/2/14 | 54.41 | 54.4  | 82389.07 | 50988.58 | 2.57 | 122.21 | 36.69 | 1311.8 | 15.59 |
| 2019/2/15 | 55.59 | 55.58 | 82389.07 | 50988.58 | 2.63 | 121.37 | 36.7  | 1318.8 | 15.76 |
| 2019/2/18 | 55.59 | 55.58 | 82389.07 | 50988.58 | 2.63 | 121.03 | 36.68 | 1318.8 | 15.76 |
| 2019/2/19 | 56.09 | 56.12 | 82389.07 | 50988.58 | 2.66 | 119.74 | 36.6  | 1338.7 | 15.97 |
| 2019/2/20 | 56.92 | 56.9  | 82389.07 | 50988.58 | 2.64 | 119.86 | 36.5  | 1338.5 | 16.03 |
| 2019/2/21 | 56.96 | 56.95 | 82389.07 | 50988.58 | 2.7  | 120    | 36.58 | 1321.2 | 15.77 |
| 2019/2/22 | 57.26 | 57.01 | 82389.07 | 50988.58 | 2.72 | 119.84 | 36.69 | 1326.7 | 15.89 |
| 2019/2/25 | 55.48 | 55.32 | 82389.07 | 50988.58 | 2.84 | 119.45 | 36.68 | 1326.6 | 15.85 |
| 2019/2/26 | 55.5  | 55.4  | 82389.07 | 50988.58 | 2.86 | 118.04 | 36.3  | 1325.2 | 15.89 |
| 2019/2/27 | 56.94 | 56.92 | 82389.07 | 50988.58 | 2.8  | 118.04 | 35.87 | 1321.7 | 15.68 |
| 2019/2/28 | 57.22 | 57.21 | 82389.07 | 50988.58 | 2.81 | 117.95 | 35.73 | 1314.7 | 15.55 |
